# Supplementary material for: The Arthropoda-specific Tramtrack group BTB protein domains use previously unknown interface to form hexamers
Source: eLife. 2024 Sep 2;13:e96832. doi: 10.7554/eLife.96832 (PMC11426971; doi:10.7554/eLife.96832)
Supplement: Supplementary file 9. [file elife-96832-supp9.xlsx]

## Sheet: HEX_HMM_sorted
HEX Hmm serch results		Taxonomy						HEX Hmm serch mean scores			Best domain scores			N of HEX domains		BTB-domains
#	Sspecies	phylum	subphylum	class	order	taxid	Protein ID	E-value	score	bias	E-valueBD	scoreBD	biasBD	expected	BD	InterPro ID	description	protein name	length	pfam ID	pos
1	Olea europaea	Streptophyta	Streptophytina	Magnoliopsida	Lamiales	158383	A0A8S0VMH2	1.7e-14	57.1	0.3	3.2e-14	56.2	0.3	1.5	1	IPR000210(25...128)	unreviewed	BTB domain-containing protein	244	PF00651	25..119
2	Rhodamnia argentea	Streptophyta	Streptophytina	Magnoliopsida	Myrtales	178133	A0A8B8P780	5.1e-14	55.6	1	1e-13	54.6	1	1.6	1	IPR000210(5...110)	unreviewed	Protein tramtrack, beta isoform-like	302	PF00651	5..101
3	Anthurium amnicola	Streptophyta	Streptophytina	Magnoliopsida	Alismatales	1678845	A0A1D1Y502	3e-13	53.2	0.4	4.7e-13	52.5	0.4	1.3	1	IPR000210(21...126)	unreviewed	BTB domain-containing protein	373	PF00651	21..116
4	Anthurium amnicola	Streptophyta	Streptophytina	Magnoliopsida	Alismatales	1678845	A0A1D1Z065	3.1e-13	53.1	0.4	4.9e-13	52.5	0.4	1.3	1	IPR000210(21...126)	unreviewed	BTB domain-containing protein	381	PF00651	21..116
5	Olea europaea	Streptophyta	Streptophytina	Magnoliopsida	Lamiales	158383	A0A8S0Q7C6	7.8e-13	51.8	1.2	1.9e-12	50.6	1.2	1.7	1	IPR000210(21...128)	unreviewed	BTB domain-containing protein	530	PF00651	21..119
6	Amphilophus citrinellus	Chordata	Craniata	Actinopteri	Cichliformes	61819	A0A3Q0R4X0	1.4e-10	44.6	0.4	2.1e-10	44	0.4	1.3	1	IPR000210(31...105)	unreviewed	BTB domain-containing protein	105	PF00651	31..104
7	Motacilla alba	Chordata	Craniata	Aves	Passeriformes	45807	A0A7K5CBQ7	2.1e-10	44.1	1.7	7.5e-10	42.3	0.5	2.3	1	IPR000210(34...139)	unreviewed	BTB domain-containing protein	298	PF00651	34..138
8	Pomatorhinus ruficollis	Chordata	Craniata	Aves	Passeriformes	932028	A0A7L4JIZ6	2.1e-10	44.1	1.7	7.5e-10	42.3	0.5	2.3	1	IPR000210(34...139)	unreviewed	BTB domain-containing protein	298	PF00651	34..138
9	Pardalotus punctatus	Chordata	Craniata	Aves	Passeriformes	254575	A0A7L3IV11	2.9e-10	43.6	1.7	9.2e-10	42	0.5	2.3	1	IPR000210(34...139)	unreviewed	BTB domain-containing protein	347	PF00651	34..138
10	Cettia cetti	Chordata	Craniata	Aves	Passeriformes	68486	A0A7L3QRP8	5.5e-10	42.7	1.7	1.3e-09	41.5	0.5	2.1	1	IPR000210(34...139)	unreviewed	BTB domain-containing protein	459	PF00651	34..138
11	Falcunculus frontatus	Chordata	Craniata	Aves	Passeriformes	254539	A0A7K6L0U2	5.4e-10	42.7	1.7	1.3e-09	41.5	0.5	2.1	1	IPR000210(34...139)	unreviewed	BTB domain-containing protein	458	PF00651	34..138
12	Smithornis capensis	Chordata	Craniata	Aves	Passeriformes	363769	A0A7K8QIC3	7.2e-10	42.3	0.5	1.3e-09	41.5	0.5	1.5	1	IPR000210(34...139)	unreviewed	BTB domain-containing protein	463	PF00651	34..138
13	Irena cyanogastra	Chordata	Craniata	Aves	Passeriformes	175120	A0A7K9QHR7	7.4e-10	42.3	0.4	1.4e-09	41.4	0.4	1.5	1	IPR000210(37...144)	unreviewed	BTB domain-containing protein	593	PF00651	37..143
14	Brachypodius atriceps	Chordata	Craniata	Aves	Passeriformes	182895	A0A7K7MLN9	5.6e-10	42.7	1.7	1.5e-09	41.3	0.5	2.3	1	IPR000210(34...139)	unreviewed	BTB domain-containing protein	520	PF00651	34..138
15	Edolisoma coerulescens	Chordata	Craniata	Aves	Passeriformes	2585810	A0A7K9NW35	8.2e-10	42.1	1.7	1.7e-09	41.2	0.5	2.1	1	IPR000210(34...139)	unreviewed	BTB domain-containing protein	556	PF00651	34..138
16	Phainopepla nitens	Chordata	Craniata	Aves	Passeriformes	161653	A0A7L1TTU2	8e-10	42.2	1.7	1.7e-09	41.1	0.5	2.1	1	IPR000210(34...139)	unreviewed	BTB domain-containing protein	563	PF00651	34..138
17	Alaudala cheleensis	Chordata	Craniata	Aves	Passeriformes	670337	A0A7L2BHH8	9.1e-10	42	1.7	1.8e-09	41.1	0.5	2.1	1	IPR000210(33...138)	unreviewed	BTB domain-containing protein	592	PF00651	33..137
18	Aleadryas rufinucha	Chordata	Craniata	Aves	Passeriformes	461220	A0A7K8HNS6	9.1e-10	42	1.7	1.8e-09	41	0.5	2.1	1	IPR000210(34...139)	unreviewed	BTB domain-containing protein	593	PF00651	34..138
19	Alopecoenas beccarii	Chordata	Craniata	Aves	Columbiformes	262131	A0A7L4F5M4	9.1e-10	42	1.7	1.8e-09	41.1	0.5	2.1	1	IPR000210(34...139)	unreviewed	BTB domain-containing protein	592	PF00651	34..138
20	Atrichornis clamosus	Chordata	Craniata	Aves	Passeriformes	449594	A0A852NL67	9.1e-10	42	1.7	1.8e-09	41.1	0.5	2.1	1	IPR000210(34...139)	unreviewed	BTB domain-containing protein	592	PF00651	34..138
21	Burhinus bistriatus	Chordata	Craniata	Aves	Charadriiformes	240201	A0A7K4SY32	9.1e-10	42	1.7	1.8e-09	41.1	0.5	2.1	1	IPR000210(34...139)	unreviewed	BTB domain-containing protein	592	PF00651	34..138
22	Callaeas wilsoni	Chordata	Craniata	Aves	Passeriformes	1347786	A0A7L4KRX9	9.1e-10	42	1.7	1.8e-09	41	0.5	2.1	1	IPR000210(34...139)	unreviewed	BTB domain-containing protein	593	PF00651	34..138
23	Chaetorhynchus papuensis	Chordata	Craniata	Aves	Passeriformes	254446	A0A7K8JIB8	8.8e-10	42	1.7	1.8e-09	41.1	0.5	2.1	1	IPR000210(34...139)	unreviewed	BTB domain-containing protein	591	PF00651	34..138
24	Chauna torquata	Chordata	Craniata	Aves	Anseriformes	30388	A0A7L0KII0	9.1e-10	42	1.7	1.8e-09	41.1	0.5	2.1	1	IPR000210(34...139)	unreviewed	BTB domain-containing protein	592	PF00651	34..138
25	Chloropsis cyanopogon	Chordata	Craniata	Aves	Passeriformes	1218682	A0A852AEW1	8.9e-10	42	1.7	1.8e-09	41.1	0.5	2.1	1	IPR000210(33...138)	unreviewed	BTB domain-containing protein	589	PF00651	33..137
26	Cinclus mexicanus	Chordata	Craniata	Aves	Passeriformes	161649	A0A7L2JJC9	9.1e-10	42	1.7	1.8e-09	41	0.5	2.1	1	IPR000210(34...139)	unreviewed	BTB domain-containing protein	593	PF00651	34..138
27	Copsychus sechellarum	Chordata	Craniata	Aves	Passeriformes	797021	A0A851VIA5	9e-10	42	1.7	1.8e-09	41.1	0.5	2	1	IPR000210(34...139)	unreviewed	BTB domain-containing protein	582	PF00651	34..138
28	Crypturellus undulatus	Chordata	Craniata	Aves	Tinamiformes	48396	A0A7K4LG74	9e-10	42	1.7	1.8e-09	41.1	0.5	2.1	1	IPR000210(33...138)	unreviewed	BTB domain-containing protein	591	PF00651	33..137
29	Donacobius atricapilla	Chordata	Craniata	Aves	Passeriformes	237420	A0A851JC14	9.2e-10	42	1.7	1.8e-09	41	0.5	2	1	IPR000210(34...139)	unreviewed	BTB domain-containing protein	593	PF00651	34..138
30	Drymodes brunneopygia	Chordata	Craniata	Aves	Passeriformes	626378	A0A7L3KZK6	9.2e-10	42	1.7	1.8e-09	41	0.5	2	1	IPR000210(34...139)	unreviewed	BTB domain-containing protein	593	PF00651	34..138
31	Formicarius rufipectus	Chordata	Craniata	Aves	Passeriformes	1118560	A0A7L0NEQ8	9.1e-10	42	1.7	1.8e-09	41.1	0.5	2.1	1	IPR000210(34...139)	unreviewed	BTB domain-containing protein	592	PF00651	34..138
32	Grantiella picta	Chordata	Craniata	Aves	Passeriformes	266360	A0A7K6EXM0	9.1e-10	42	1.7	1.8e-09	41	0.5	2.1	1	IPR000210(34...139)	unreviewed	BTB domain-containing protein	593	PF00651	34..138
33	Grus americana	Chordata	Craniata	Aves	Gruiformes	9117	A0A850TI22	9.1e-10	42	1.7	1.8e-09	41.1	0.5	2.1	1	IPR000210(34...139)	unreviewed	BTB domain-containing protein	592	PF00651	34..138
34	Halcyon senegalensis	Chordata	Craniata	Aves	Coraciiformes	342381	A0A851YNN7	9.1e-10	42	1.7	1.8e-09	41.1	0.5	2.1	1	IPR000210(34...139)	unreviewed	BTB domain-containing protein	592	PF00651	34..138
35	Ifrita kowaldi	Chordata	Craniata	Aves	Passeriformes	461245	A0A7K6PH39	9.1e-10	42	1.7	1.8e-09	41	0.5	2.1	1	IPR000210(34...139)	unreviewed	BTB domain-containing protein	593	PF00651	34..138
36	Leptocoma aspasia	Chordata	Craniata	Aves	Passeriformes	2585812	A0A7L0UXS1	9.1e-10	42	1.7	1.8e-09	41	0.5	2.1	1	IPR000210(34...139)	unreviewed	BTB domain-containing protein	593	PF00651	34..138
37	Melospiza melodia	Chordata	Craniata	Aves	Passeriformes	44397	A0A7K4Q3Z5	9.1e-10	42	1.7	1.8e-09	41	0.5	2.1	1	IPR000210(34...139)	unreviewed	BTB domain-containing protein	593	PF00651	34..138
38	Menura novaehollandiae	Chordata	Craniata	Aves	Passeriformes	47692	A0AA97N7Y6	9.1e-10	42	1.7	1.8e-09	41.1	0.5	2.1	1	IPR000210(34...139)	unreviewed	BTB domain-containing protein	592	PF00651	34..138
39	Mohoua ochrocephala	Chordata	Craniata	Aves	Passeriformes	874463	A0A7K7XKL1	9.1e-10	42	1.7	1.8e-09	41	0.5	2.1	1	IPR000210(34...139)	unreviewed	BTB domain-containing protein	593	PF00651	34..138
40	Molothrus ater	Chordata	Craniata	Aves	Passeriformes	84834	A0A7L3UXE6	9.2e-10	42	1.7	1.8e-09	41	0.5	2.1	1	IPR000210(34...139)	unreviewed	BTB domain-containing protein	593	PF00651	34..138
41	Neopipo cinnamomea	Chordata	Craniata	Aves	Passeriformes	456388	A0A7K4QDV7	9.1e-10	42	1.7	1.8e-09	41.1	0.5	2.1	1	IPR000210(34...139)	unreviewed	BTB domain-containing protein	592	PF00651	34..138
42	Nesospiza acunhae	Chordata	Craniata	Aves	Passeriformes	381881	A0A7K7S155	8.8e-10	42.1	1.7	1.8e-09	41.1	0.5	2.1	1	IPR000210(21...126)	unreviewed	BTB domain-containing protein	580	PF00651	21..125
43	Nicator chloris	Chordata	Craniata	Aves	Passeriformes	237433	A0A852HPG5	9.1e-10	42	1.7	1.8e-09	41.1	0.5	2.1	1	IPR000210(34...139)	unreviewed	BTB domain-containing protein	592	PF00651	34..138
44	Nothoprocta ornata	Chordata	Craniata	Aves	Tinamiformes	83376	A0A7K7AWN4	9.1e-10	42	1.7	1.8e-09	41.1	0.5	2.1	1	IPR000210(34...139)	unreviewed	BTB domain-containing protein	592	PF00651	34..138
45	Nothoprocta pentlandii	Chordata	Craniata	Aves	Tinamiformes	2585814	A0A7K6ZTC3	9.1e-10	42	1.7	1.8e-09	41.1	0.5	2.1	1	IPR000210(34...139)	unreviewed	BTB domain-containing protein	592	PF00651	34..138
46	Odontophorus gujanensis	Chordata	Craniata	Aves	Galliformes	886794	A0A7K9YS31	9.1e-10	42	1.7	1.8e-09	41.1	0.5	2.1	1	IPR000210(34...139)	unreviewed	BTB domain-containing protein	592	PF00651	34..138
47	Onychorhynchus coronatus	Chordata	Craniata	Aves	Passeriformes	360224	A0A7K5ZP66	9.1e-10	42	1.7	1.8e-09	41.1	0.5	2.1	1	IPR000210(34...139)	unreviewed	BTB domain-containing protein	592	PF00651	34..138
48	Origma solitaria	Chordata	Craniata	Aves	Passeriformes	720586	A0A7K6DUB1	9.1e-10	42	1.7	1.8e-09	41	0.5	2.1	1	IPR000210(34...139)	unreviewed	BTB domain-containing protein	593	PF00651	34..138
49	Pachyramphus minor	Chordata	Craniata	Aves	Passeriformes	369605	A0A7K5DN43	9.1e-10	42	1.7	1.8e-09	41.1	0.5	2.1	1	IPR000210(34...139)	unreviewed	BTB domain-containing protein	592	PF00651	34..138
50	Picathartes gymnocephalus	Chordata	Craniata	Aves	Passeriformes	175131	A0A851BL60	9.1e-10	42	1.7	1.8e-09	41	0.5	2.1	1	IPR000210(34...139)	unreviewed	BTB domain-containing protein	593	PF00651	34..138
51	Poecile atricapillus	Chordata	Craniata	Aves	Passeriformes	48891	A0A7K7R304	9.1e-10	42	1.7	1.8e-09	41	0.5	2.1	1	IPR000210(34...139)	unreviewed	BTB domain-containing protein	593	PF00651	34..138
52	Promerops cafer	Chordata	Craniata	Aves	Passeriformes	254652	A0A7K6Y5U0	9.1e-10	42	1.7	1.8e-09	41	0.5	2.1	1	IPR000210(34...139)	unreviewed	BTB domain-containing protein	593	PF00651	34..138
53	Rhegmatorhina hoffmannsi	Chordata	Craniata	Aves	Passeriformes	468512	A0A974B944	9.1e-10	42	1.7	1.8e-09	41.1	0.5	2.1	1	IPR000210(34...139)	unreviewed	BTB domain-containing protein	592	PF00651	34..138
54	Sterrhoptilus dennistouni	Chordata	Craniata	Aves	Passeriformes	2585820	A0A7K9S3X4	9.4e-10	42	1.7	1.8e-09	41	0.5	2.1	1	IPR000210(35...140)	unreviewed	BTB domain-containing protein	602	PF00651	35..139
55	Sylvietta virens	Chordata	Craniata	Aves	Passeriformes	208069	A0A7L0LKK5	9.1e-10	42	1.7	1.8e-09	41.1	0.5	2.1	1	IPR000210(33...138)	unreviewed	BTB domain-containing protein	592	PF00651	33..137
56	Syrrhaptes paradoxus	Chordata	Craniata	Aves	Ciconiiformes	302527	A0A7L3AGZ4	9.1e-10	42	1.7	1.8e-09	41.1	0.5	2.1	1	IPR000210(34...139)	unreviewed	BTB domain-containing protein	592	PF00651	34..138
57	Tachuris rubrigastra	Chordata	Craniata	Aves	Passeriformes	495162	A0A7K4W5L0	9.1e-10	42	1.7	1.8e-09	41.1	0.5	2.1	1	IPR000210(34...139)	unreviewed	BTB domain-containing protein	592	PF00651	34..138
58	Tichodroma muraria	Chordata	Craniata	Aves	Passeriformes	237442	A0A850ZQ72	9.1e-10	42	1.7	1.8e-09	41	0.5	2.1	1	IPR000210(34...139)	unreviewed	BTB domain-containing protein	593	PF00651	34..138
59	Vidua chalybeata	Chordata	Craniata	Aves	Passeriformes	81927	A0A851KL15	9.2e-10	42	1.7	1.8e-09	41	0.5	2.1	1	IPR000210(34...139)	unreviewed	BTB domain-containing protein	593	PF00651	34..138
60	Vireo altiloquus	Chordata	Craniata	Aves	Passeriformes	34956	A0A7K5L8C2	9.1e-10	42	1.7	1.8e-09	41	0.5	2.1	1	IPR000210(34...139)	unreviewed	BTB domain-containing protein	593	PF00651	34..138
61	Xiphorhynchus elegans	Chordata	Craniata	Aves	Passeriformes	269412	A0A7L3NV24	9.1e-10	42	1.7	1.8e-09	41.1	0.5	2.1	1	IPR000210(34...139)	unreviewed	BTB domain-containing protein	592	PF00651	34..138
62	Calyptomena viridis	Chordata	Craniata	Aves	Passeriformes	135972	A0A851BXP6	9.8e-10	41.9	1.7	1.9e-09	41	0.5	2	1	IPR000210(34...139)	unreviewed	BTB domain-containing protein	618	PF00651	34..138
63	Oenanthe oenanthe	Chordata	Craniata	Aves	Passeriformes	279966	A0A7L1EBF0	9.3e-10	42	1.7	1.9e-09	41	0.5	2.1	1	IPR000210(33...138)	unreviewed	BTB domain-containing protein	610	PF00651	33..137
64	Sapayoa aenigma	Chordata	Craniata	Aves	Passeriformes	239371	A0A7K7SGN4	9.8e-10	41.9	1.7	1.9e-09	41	0.5	2.1	1	IPR000210(34...139)	unreviewed	BTB domain-containing protein	618	PF00651	34..138
65	Urocynchramus pylzowi	Chordata	Craniata	Aves	Passeriformes	571890	A0A7K5SX90	9.4e-10	42	0.9	2.7e-09	40.5	0.2	2.1	1	IPR000210(34...157)	unreviewed	BTB domain-containing protein	607	PF00651	34..156
66	Pundamilia nyererei	Chordata	Craniata	Actinopteri	Cichliformes	303518	A0A3B4FH77	1.3e-09	41.5	1.5	2.8e-09	40.5	0.4	2.1	1	IPR000210(44...150)	unreviewed	BTB domain-containing protein	597	PF00651	44..149
67	Limosa lapponica	Chordata	Craniata	Aves	Charadriiformes	1758121	A0A2I0TG47	1.3e-09	41.5	2.3	3.3e-09	40.2	0.8	2.2	1	IPR000210(2...115)	unreviewed	BTB domain-containing protein	324	PF00651	2..114
68	Cnemophilus loriae	Chordata	Craniata	Aves	Passeriformes	254448	A0A7K8B136	1.8e-09	41	1.7	3.7e-09	40	0.5	2.1	1	IPR000210(34...157)	unreviewed	BTB domain-containing protein	610	PF00651	34..156
69	Sousa chinensis	Chordata	Craniata	Mammalia	Artiodactyla	103600	A0A484GVA0	3.8e-09	40	0.3	3.8e-09	40	0.3	1.8	1	IPR000210(84...188)	unreviewed	BTB domain-containing protein	641	PF00651	84..187
70	Rhodinocichla rosea	Chordata	Craniata	Aves	Passeriformes	58203	A0A7K8S9C9	1.5e-09	41.3	1	4.4e-09	39.8	0.2	2.1	1	IPR000210(34...158)	unreviewed	BTB domain-containing protein	612	PF00651	34..157
71	Neogobius melanostomus	Chordata	Craniata	Actinopteri	Gobiiformes	47308	A0A8C6WM90	3.4e-09	40.2	0.2	6.7e-09	39.2	0.2	1.5	1	IPR000210(22...72)	unreviewed	BTB domain-containing protein	72	PF00651	22..64
72	Hydra vulgaris	Cnidaria		Hydrozoa	Anthoathecata	6087	A0A8B7DDM9	3.6e-09	40.1	0.3	7.6e-09	39	0.3	1.6	1	IPR000210(24...132)	unreviewed	BTB domain-containing protein	557	PF00651	24..130
73	Conger conger	Chordata	Craniata	Actinopteri	Anguilliformes	82655	A0A9Q1HPI7	4.3e-09	39.8	0.6	9.3e-09	38.8	0.6	1.5	1	IPR000210(16...123)	unreviewed	BTB domain-containing protein	589	PF00651	16..122
74	Astatotilapia calliptera	Chordata	Craniata	Actinopteri	Cichliformes	8154	A0A3P8QB85	8.7e-09	38.9	2.8	1.1e-08	38.5	1.6	1.8	1	IPR000210(20...78)	unreviewed	BTB domain-containing protein	86	PF00651	20..64
75	Athene cunicularia	Chordata	Craniata	Aves	Strigiformes	194338	A0A663LT59	7.3e-09	39.1	2.1	1.2e-08	38.4	0.7	2.1	1	IPR000210(37...143)	unreviewed	BTB domain-containing protein	596	PF00651	37..142
76	Lates japonicus	Chordata	Craniata	Actinopteri		270547	A0AAD3MY45	6.6e-09	39.2	0	1.2e-08	38.4	0	1.5	1	IPR000210(54...125)	unreviewed	Kelch-like protein 20	125	PF00651	54..124
77	Oryzias javanicus	Chordata	Craniata	Actinopteri	Beloniformes	123683	A0A3S2M390	8.9e-09	38.8	2	1.2e-08	38.4	0.6	2	1	IPR000210(20...86)	unreviewed	BTB domain-containing protein	86	PF00651	20..82
78	Pocillopora damicornis	Cnidaria		Anthozoa	Scleractinia	46731	A0A3M6U970	5.4e-09	39.5	0	1.2e-08	38.4	0	1.6	1	IPR000210(24...131)	unreviewed	BTB domain-containing protein	385	PF00651	24..130
79	Poeciliopsis prolifica	Chordata	Craniata	Actinopteri	Cyprinodontiformes	188132	A0A0S7IB83	8.5e-09	38.9	0.3	1.2e-08	38.4	0.3	1.3	1	IPR000210(31...118)	unreviewed	BTB domain-containing protein	118	PF00651	31..115
80	Amphiprion ocellaris	Chordata	Craniata	Actinopteri		80972	A0A3Q1CHH6	7.6e-09	39	0.2	1.3e-08	38.3	0.2	1.4	1	IPR000210(26...77)	unreviewed	BTB domain-containing protein	89	PF00651	26..70
81	Galemys pyrenaicus	Chordata	Craniata	Mammalia	Eulipotyphla	202257	A0A8J6AM31	8.7e-09	38.9	0.3	1.3e-08	38.3	0.3	1.3	1	IPR000210(8...88)	unreviewed	BTB domain-containing protein	88	PF00651	8..88
82	Hippocampus comes	Chordata	Craniata	Actinopteri	Syngnathiformes	109280	A0A3Q2YXK5	9.9e-09	38.7	0.1	1.6e-08	38	0.1	1.4	1	IPR000210(25...68)	unreviewed	BTB domain-containing protein	106	PF00651	25..68
83	Hypotaenidia okinawae	Chordata	Craniata	Aves	Gruiformes	2861861	A0A6G1S0X8	1.6e-09	41.2	1.1	1.6e-08	38	0.3	2.5	1	IPR000210(1...88)	unreviewed	BTB domain-containing protein	139	PF00651	1..87
84	Seriola lalandi	Chordata	Craniata	Actinopteri	Carangiformes	1841481	A0A3B4X686	1.2e-08	38.5	0.1	1.6e-08	38	0.1	1.3	1	IPR000210(14...77)	unreviewed	BTB domain-containing protein	77	PF00651	14..59
85	Biomphalaria glabrata	Mollusca		Gastropoda		6526	A0A2C9LKQ1	7e-09	39.2	0.2	1.8e-08	37.9	0.2	1.7	1	IPR000210(17...118)	unreviewed	BTB domain-containing protein	553	PF00651	17..115
86	Biomphalaria glabrata	Mollusca		Gastropoda		6526	A0A9U8EHM0	7.2e-09	39.1	0.2	1.8e-08	37.9	0.2	1.7	1	IPR000210(17...118)	unreviewed	BTB domain-containing protein	553	PF00651	17..115
87	Biomphalaria pfeifferi	Mollusca		Gastropoda		112525	A0AAD8C356	6.8e-09	39.2	0.2	1.8e-08	37.9	0.2	1.7	1	IPR000210(17...118)	unreviewed	Kelch-like protein 29	547	PF00651	17..116
88	Homo sapiens	Chordata	Craniata	Mammalia	Primates	9606	J3KRQ2	8.8e-09	38.8	1	1.8e-08	37.8	0.5	1.8	1	IPR000210(26...102)	unreviewed	BTB domain-containing protein	102	PF00651	26..101
89	Pan troglodytes	Chordata	Craniata	Mammalia	Primates	9598	A0A2J8MP39	8.8e-09	38.8	1	1.8e-08	37.8	0.5	1.8	1	IPR000210(26...102)	unreviewed	BTB domain-containing protein	102	PF00651	26..101
90	Pongo abelii	Chordata	Craniata	Mammalia	Primates	9601	A0A2J8XGV1	8.8e-09	38.8	1	1.8e-08	37.8	0.5	1.8	1	IPR000210(26...102)	unreviewed	BTB domain-containing protein	102	PF00651	26..101
91	Scyliorhinus torazame	Chordata	Craniata	Chondrichthyes	Carcharhiniformes	75743	A0A401NK12	7.8e-09	39	0.3	1.8e-08	37.8	0.3	1.6	1	IPR000210(17...121)	unreviewed	BTB domain-containing protein	706	PF00651	17..108
92	Stylophora pistillata	Cnidaria		Anthozoa	Scleractinia	50429	A0A2B4SF54	6.9e-09	39.2	0	1.9e-08	37.8	0	1.8	1	IPR000210(24...131)	unreviewed	BTB domain-containing protein	570	PF00651	24..130
93	Amphilophus citrinellus	Chordata	Craniata	Actinopteri	Cichliformes	61819	A0A3Q0S4R2	1.3e-08	38.4	0.2	2.1e-08	37.6	0.2	1.4	1	IPR000210(21...117)	unreviewed	BTB domain-containing protein	118	PF00651	21..110
94	Homo sapiens	Chordata	Craniata	Mammalia	Primates	9606	D6RGC3	1.3e-08	38.3	0.3	2.1e-08	37.6	0.3	1.4	1	IPR000210(8...115)	unreviewed	BTB domain-containing protein	117	PF00651	8..114
95	Pan troglodytes	Chordata	Craniata	Mammalia	Primates	9598	A0A2J8MQH6	1.3e-08	38.3	0.3	2.1e-08	37.6	0.3	1.4	1	IPR000210(8...115)	unreviewed	BTB domain-containing protein	117	PF00651	8..114
96	Paramormyrops kingsleyae	Chordata	Craniata	Actinopteri	Osteoglossiformes	1676925	A0A3B3SGM5	1.3e-08	38.3	0.2	2.1e-08	37.6	0.2	1.4	1	IPR000210(16...115)	unreviewed	BTB domain-containing protein	131	PF00651	16..105
97	Pongo abelii	Chordata	Craniata	Mammalia	Primates	9601	A0A2J8W015	1.3e-08	38.3	0.3	2.1e-08	37.6	0.3	1.4	1	IPR000210(8...115)	unreviewed	BTB domain-containing protein	117	PF00651	8..114
98	Salmo salar	Chordata	Craniata	Actinopteri	Salmoniformes	8030	A0A1S3LNA1	2e-08	37.7	4.5	2.1e-08	37.7	2.2	2.1	1	IPR000210(31...156)	unreviewed	BTB domain-containing protein	576	PF00651	31..155
99	Micrurus spixii	Chordata	Craniata	Lepidosauria	Squamata	129469	A0A2D4N0E4	4.4e-09	39.8	0.9	2.2e-08	37.6	0.5	2.2	1	IPR000210(39...113)	unreviewed	BTB domain-containing protein	113	PF00651	39..112
100	Podiceps cristatus	Chordata	Craniata	Aves	Podicipediformes	345573	A0A094LB86	1.1e-08	38.5	4.1	2.2e-08	37.6	1.9	2.3	1	IPR000210(34...148)	unreviewed	BTB domain-containing protein	307	PF00651	34..147
101	Salmo salar	Chordata	Craniata	Actinopteri	Salmoniformes	8030	A0A1S3LMA4	2.2e-08	37.6	4.5	2.2e-08	37.6	2.2	2.1	1	IPR000210(31...156)	unreviewed	BTB domain-containing protein	609	PF00651	31..155
102	Salmo salar	Chordata	Craniata	Actinopteri	Salmoniformes	8030	A0A1S3LMD7	2.2e-08	37.5	2.2	2.2e-08	37.5	2.2	2.1	1	IPR000210(31...156)	unreviewed	BTB domain-containing protein	619	PF00651	31..155
103	Anas platyrhynchos	Chordata	Craniata	Aves	Anseriformes	8840	A0A493TI29	1.1e-08	38.5	0	2.4e-08	37.4	0	1.6	1	IPR000210(54...160)	unreviewed	BTB domain-containing protein	195	PF00651	54..159
104	Candidula unifasciata	Mollusca		Gastropoda	Stylommatophora	100452	A0A8S3YSH0	1.1e-08	38.6	0.2	2.4e-08	37.5	0.2	1.6	1	IPR000210(89...197)	unreviewed	BTB domain-containing protein	635	PF00651	89..196
105	Ditylenchus destructor	Nematoda		Chromadorea	Rhabditida	166010	A0AAD4RCQ5	2e-08	37.7	6.5	2.5e-08	37.4	0.1	3.6	1	IPR000210(36...139)	unreviewed	BTB/POZ domain-containing protein	1028	PF00651	36..136
106	Etheostoma spectabile	Chordata	Craniata	Actinopteri	Perciformes	54343	A0A5J5CBF1	1.2e-08	38.4	0	2.5e-08	37.4	0	1.6	1	IPR000210(59...155)	unreviewed	BTB domain-containing protein	199	PF00651	59..136
107	Nothobranchius kadleci	Chordata	Craniata	Actinopteri	Cyprinodontiformes	1051664	A0A1A8BP42	3.5e-09	40.1	1.1	2.5e-08	37.4	0.3	2.4	1	IPR000210(31...138)	unreviewed	BTB domain-containing protein	186	PF00651	31..137
108	Nothobranchius korthausae	Chordata	Craniata	Actinopteri	Cyprinodontiformes	1143690	A0A1A8FQ59	3.5e-09	40.1	1.1	2.5e-08	37.4	0.3	2.4	1	IPR000210(31...138)	unreviewed	BTB domain-containing protein	186	PF00651	31..137
109	Pelobates cultripes	Chordata	Craniata	Amphibia	Anura	61616	A0AAD1WHX6	1.2e-08	38.5	0	2.5e-08	37.4	0	1.6	1	IPR000210(58...164)	unreviewed	Kelch 20	200	PF00651	58..163
110	Sus scrofa	Chordata	Craniata	Mammalia	Artiodactyla	9823	A0A8D1XBN8	1.1e-08	38.5	0	2.5e-08	37.4	0	1.6	1	IPR000210(41...147)	unreviewed	BTB domain-containing protein	198	PF00651	41..146
111	Chelonoidis abingdonii	Chordata	Craniata		Testudines	106734	A0A8C0IR42	9.1e-09	38.8	1.9	2.6e-08	37.4	0.5	2.2	1	IPR000210(30...124)	unreviewed	BTB domain-containing protein	124	PF00651	30..109
112	Molossus molossus	Chordata	Craniata	Mammalia	Chiroptera	27622	A0A7J8CRK9	1.1e-08	38.5	0	2.6e-08	37.3	0	1.7	1	IPR000210(59...165)	unreviewed	BTB domain-containing protein	203	PF00651	59..164
113	Mus musculus	Chordata	Craniata	Mammalia	Rodentia	10090	Q8BKE8	1.2e-08	38.5	0	2.6e-08	37.4	0	1.6	1	IPR000210(54...160)	unreviewed	BTB domain-containing protein	201	PF00651	54..159
114	Owenia fusiformis	Annelida		Polychaeta	Sabellida	6347	A0A8S4Q107	1.2e-08	38.5	0	2.6e-08	37.3	0	1.7	1	IPR000210(79...149)	unreviewed	BTB domain-containing protein	149	PF00651	79..149
115	Pelobates cultripes	Chordata	Craniata	Amphibia	Anura	61616	A0AAD1WG88	1.2e-08	38.4	0	2.6e-08	37.4	0	1.6	1	IPR000210(59...165)	unreviewed	Kelch 20	201	PF00651	59..164
116	Poeciliopsis prolifica	Chordata	Craniata	Actinopteri	Cyprinodontiformes	188132	A0A0S7HZ47	1e-08	38.7	1.6	2.6e-08	37.4	0.2	2.2	1	IPR000210(14...116)	unreviewed	BTB domain-containing protein	133	PF00651	14..112
117	Poeciliopsis prolifica	Chordata	Craniata	Actinopteri	Cyprinodontiformes	188132	A0A0S7I477	1e-08	38.6	1.6	2.6e-08	37.3	0.2	2.2	1	IPR000210(16...118)	unreviewed	BTB domain-containing protein	135	PF00651	16..114
118	Cercocebus atys	Chordata	Craniata	Mammalia	Primates	9531	A0A2K5LWM2	1.2e-08	38.4	0	2.7e-08	37.3	0	1.6	1	IPR000210(52...158)	unreviewed	BTB domain-containing protein	209	PF00651	52..157
119	Danionella translucida	Chordata	Craniata	Actinopteri	Cypriniformes	623744	A0A553QD90	1.7e-08	37.9	0.3	2.7e-08	37.3	0	1.5	1	IPR000210(35...94)	unreviewed	BTB domain-containing protein	94	PF00651	35..85
120	Dicentrarchus labrax	Chordata	Craniata	Actinopteri		13489	A0A8C4E061	1.2e-08	38.4	0	2.7e-08	37.3	0	1.6	1	IPR000210(60...166)	unreviewed	BTB domain-containing protein	211	PF00651	60..165
121	Macaca nemestrina	Chordata	Craniata	Mammalia	Primates	9545	A0A2K6DZC8	1.3e-08	38.3	0	2.7e-08	37.3	0	1.6	1	IPR000210(54...160)	unreviewed	BTB domain-containing protein	209	PF00651	54..159
122	Mandrillus leucophaeus	Chordata	Craniata	Mammalia	Primates	9568	A0A2K5XEZ2	1.2e-08	38.4	0	2.7e-08	37.3	0	1.6	1	IPR000210(52...158)	unreviewed	BTB domain-containing protein	207	PF00651	52..157
123	Oreochromis aureus	Chordata	Craniata	Actinopteri	Cichliformes	47969	A0A668W483	1.1e-08	38.6	0	2.7e-08	37.3	0	1.7	1	IPR000210(41...147)	unreviewed	BTB domain-containing protein	210	PF00651	41..146
124	Pantherophis guttatus	Chordata	Craniata	Lepidosauria	Squamata	94885	A0A6P9AWC4	1.2e-08	38.4	0	2.7e-08	37.3	0	1.6	1	IPR000210(59...165)	unreviewed	BTB domain-containing protein	210	PF00651	59..164
125	Rhinopithecus roxellana	Chordata	Craniata	Mammalia	Primates	61622	A0A2K6QRT6	1.2e-08	38.4	0	2.7e-08	37.3	0	1.6	1	IPR000210(52...158)	unreviewed	BTB domain-containing protein	207	PF00651	52..157
126	Strigops habroptila	Chordata	Craniata	Aves	Psittaciformes	2489341	A0A672TH51	1.7e-08	37.9	0.1	2.7e-08	37.3	0.1	1.3	1	IPR000210(27...89)	unreviewed	BTB domain-containing protein	89	PF00651	27..87
127	Anabas testudineus	Chordata	Craniata	Actinopteri	Anabantiformes	64144	A0A3Q1I5W4	1.2e-08	38.4	0	2.8e-08	37.2	0	1.7	1	IPR000210(58...164)	unreviewed	BTB domain-containing protein	217	PF00651	58..163
128	Bos taurus	Chordata	Craniata	Mammalia	Artiodactyla	9913	A0AAA9S8X0	1.3e-08	38.3	0	2.8e-08	37.2	0	1.6	1	IPR000210(59...165)	unreviewed	Kelch like family member 20	215	PF00651	59..164
129	Cyclopterus lumpus	Chordata	Craniata	Actinopteri	Perciformes	8103	A0A8C3AUQ0	1.3e-08	38.4	0	2.8e-08	37.2	0	1.6	1	IPR000210(58...164)	unreviewed	BTB domain-containing protein	215	PF00651	58..163
130	Lates calcarifer	Chordata	Craniata	Actinopteri		8187	A0A4W6CXG5	1.2e-08	38.4	0	2.8e-08	37.3	0	1.7	1	IPR000210(54...160)	unreviewed	BTB domain-containing protein	212	PF00651	54..159
131	Mastacembelus armatus	Chordata	Craniata	Actinopteri	Synbranchiformes	205130	A0A7N9AX41	1.3e-08	38.3	0.6	2.8e-08	37.2	0	1.9	1	IPR000210(59...165)	unreviewed	BTB domain-containing protein	214	PF00651	59..164
132	Protopolystoma xenopodis	Platyhelminthes		Monogenea	Polystomatidea	117903	A0A448WM96	1.1e-08	38.5	0.2	2.8e-08	37.3	0.2	1.7	1	IPR000210(126...232)	unreviewed	BTB domain-containing protein	289	PF00651	126..231
133	Scleropages formosus	Chordata	Craniata	Actinopteri	Osteoglossiformes	113540	A0A8C9SC31	1.3e-08	38.3	0	2.8e-08	37.3	0	1.6	1	IPR000210(59...165)	unreviewed	BTB domain-containing protein	212	PF00651	59..164
134	Sparus aurata	Chordata	Craniata	Actinopteri	Spariformes	8175	A0A671WIQ9	1.1e-08	38.6	0	2.8e-08	37.2	0	1.7	1	IPR000210(58...164)	unreviewed	BTB domain-containing protein	214	PF00651	58..163
135	Sphaeramia orbicularis	Chordata	Craniata	Actinopteri	Kurtiformes	375764	A0A673CMW0	1.3e-08	38.3	0	2.8e-08	37.2	0	1.6	1	IPR000210(59...165)	unreviewed	BTB domain-containing protein	215	PF00651	59..164
136	Sus scrofa	Chordata	Craniata	Mammalia	Artiodactyla	9823	A0A5G2QKV0	1.3e-08	38.3	0	2.8e-08	37.2	0	1.6	1	IPR000210(59...165)	unreviewed	BTB domain-containing protein	216	PF00651	59..164
137	Sus scrofa	Chordata	Craniata	Mammalia	Artiodactyla	9823	A0A8D1FMB7	1.3e-08	38.3	0	2.8e-08	37.2	0	1.6	1	IPR000210(59...165)	unreviewed	BTB domain-containing protein	216	PF00651	59..164
138	Zosterops lateralis	Chordata	Craniata	Aves	Passeriformes	1220523	A0A8D2Q2N4	1.3e-08	38.3	0	2.8e-08	37.2	0	1.6	1	IPR000210(59...165)	unreviewed	BTB domain-containing protein	216	PF00651	59..164
139	Capra hircus	Chordata	Craniata	Mammalia	Artiodactyla	9925	A0A8C2XUM9	1.2e-08	38.4	0	2.9e-08	37.2	0	1.7	1	IPR000210(59...165)	unreviewed	BTB domain-containing protein	218	PF00651	59..164
140	Castor canadensis	Chordata	Craniata	Mammalia	Rodentia	51338	A0A8B7W3R3	1.5e-08	38.1	0.3	2.9e-08	37.2	0.3	1.5	1	IPR000210(59...143)	unreviewed	BTB domain-containing protein	143	PF00651	59..140
141	Chiloscyllium punctatum	Chordata	Craniata	Chondrichthyes	Orectolobiformes	137246	A0A401RTZ5	1.6e-08	38.1	0.6	2.9e-08	37.2	0.6	1.5	1	IPR000210(60...163)	unreviewed	BTB domain-containing protein	699	PF00651	60..148
142	Gorilla gorilla	Chordata	Craniata	Mammalia	Primates	9595	A0A2I2Y570	1.1e-08	38.5	0	2.9e-08	37.2	0	1.8	1	IPR000210(50...156)	unreviewed	BTB domain-containing protein	221	PF00651	50..155
143	Gulo gulo	Chordata	Craniata	Mammalia	Carnivora	48420	A0A9X9PT30	1.6e-08	38	0.3	2.9e-08	37.2	0.3	1.4	1	IPR000210(1...89)	unreviewed	BTB domain-containing protein	141	PF00651	2..88
144	Homo sapiens	Chordata	Craniata	Mammalia	Primates	9606	D6R9G5	1.4e-08	38.2	0.3	2.9e-08	37.2	0.3	1.5	1	IPR000210(92...144)	unreviewed	BTB domain-containing protein	144	PF00651	92..143
145	Marmota marmota	Chordata	Craniata	Mammalia	Rodentia	9994	A0A8C5ZVP9	1.2e-08	38.4	0	2.9e-08	37.2	0	1.7	1	IPR000210(59...165)	unreviewed	BTB domain-containing protein	218	PF00651	59..164
146	Pan paniscus	Chordata	Craniata	Mammalia	Primates	9597	A0A2R9B9K3	1.1e-08	38.5	0	2.9e-08	37.2	0	1.8	1	IPR000210(50...156)	unreviewed	BTB domain-containing protein	221	PF00651	50..155
147	Pan troglodytes	Chordata	Craniata	Mammalia	Primates	9598	A0A2J8MQI1	1.4e-08	38.2	0.3	2.9e-08	37.2	0.3	1.5	1	IPR000210(92...144)	unreviewed	BTB domain-containing protein	144	PF00651	92..143
148	Pongo abelii	Chordata	Craniata	Mammalia	Primates	9601	A0A2J8W068	1.4e-08	38.2	0.3	2.9e-08	37.2	0.3	1.5	1	IPR000210(92...144)	unreviewed	BTB domain-containing protein	144	PF00651	92..143
149	Scleropages formosus	Chordata	Craniata	Actinopteri	Osteoglossiformes	113540	A0A0N8JVA1	1.8e-08	37.8	0.3	2.9e-08	37.2	0.3	1.4	1	IPR000210(129...208)	unreviewed	BTB domain-containing protein	209	PF00651	129..208
150	Scleropages formosus	Chordata	Craniata	Actinopteri	Osteoglossiformes	113540	A0A0P7VFY6	2.8e-08	37.3	3	2.9e-08	37.2	0.2	2.3	1	IPR000210(14...116)	unreviewed	BTB domain-containing protein	160	PF00651	14..111
151	Astyanax mexicanus	Chordata	Craniata	Actinopteri	Characiformes	7994	A0A8B9M3Y5	1.4e-08	38.2	0	3e-08	37.2	0	1.6	1	IPR000210(62...168)	unreviewed	BTB domain-containing protein	224	PF00651	62..167
152	Colobus angolensis	Chordata	Craniata	Mammalia	Primates	336983	A0A2K5HKQ3	1.4e-08	38.2	0	3e-08	37.1	0	1.6	1	IPR000210(52...158)	unreviewed	BTB domain-containing protein	227	PF00651	52..157
153	Cynoglossus semilaevis	Chordata	Craniata	Actinopteri	Pleuronectiformes	244447	A0A3P8UUU3	1.8e-08	37.8	0.2	3e-08	37.1	0.2	1.4	1	IPR000210(20...129)	unreviewed	BTB domain-containing protein	146	PF00651	20..120
154	Gorilla gorilla	Chordata	Craniata	Mammalia	Primates	9595	A0A2I2ZWI9	1.2e-08	38.5	0	3e-08	37.2	0	1.7	1	IPR000210(53...159)	unreviewed	BTB domain-containing protein	224	PF00651	53..158
155	Haplochromis burtoni	Chordata	Craniata	Actinopteri	Cichliformes	8153	A0A3Q2X6D9	1.3e-08	38.3	0	3e-08	37.1	0	1.6	1	IPR000210(59...165)	unreviewed	BTB domain-containing protein	228	PF00651	59..164
156	Melopsittacus undulatus	Chordata	Craniata	Aves	Psittaciformes	13146	A0A8C6JSJ2	1.3e-08	38.3	0	3e-08	37.1	0	1.6	1	IPR000210(58...164)	unreviewed	Uncharacterized protein	225	PF00651	58..163
157	Pan troglodytes	Chordata	Craniata	Mammalia	Primates	9598	A0A2I3SSB3	1.2e-08	38.4	0	3e-08	37.2	0	1.7	1	IPR000210(53...159)	unreviewed	BTB domain-containing protein	224	PF00651	53..158
158	Propithecus coquereli	Chordata	Craniata	Mammalia	Primates	379532	A0A2K6G061	1.4e-08	38.2	0	3e-08	37.1	0	1.6	1	IPR000210(49...155)	unreviewed	BTB domain-containing protein	225	PF00651	49..154
159	Rhinopithecus bieti	Chordata	Craniata	Mammalia	Primates	61621	A0A2K6L591	1.4e-08	38.2	0	3e-08	37.1	0	1.6	1	IPR000210(52...158)	unreviewed	BTB domain-containing protein	227	PF00651	52..157
160	Salmo trutta	Chordata	Craniata	Actinopteri	Salmoniformes	8032	A0A673Z6V1	1.4e-08	38.2	0	3e-08	37.1	0	1.6	1	IPR000210(59...165)	unreviewed	BTB domain-containing protein	227	PF00651	59..164
161	Albula glossodonta	Chordata	Craniata	Actinopteri	Albuliformes	121402	A0A8T2NXC5	1.4e-08	38.2	0.3	3.1e-08	37.1	0.3	1.6	1	IPR000210(10...117)	unreviewed	BTB domain-containing protein	568	PF00651	10..116
162	Apteryx owenii	Chordata	Craniata	Aves	Apterygiformes	8824	A0A8B9PXS5	1.4e-08	38.2	0	3.1e-08	37.1	0	1.6	1	IPR000210(74...180)	unreviewed	BTB domain-containing protein	231	PF00651	74..179
163	Dromaius novaehollandiae	Chordata	Craniata	Aves	Casuariiformes	8790	A0A8C4PCG4	1.5e-08	38.1	0	3.1e-08	37.1	0	1.6	1	IPR000210(59...165)	unreviewed	BTB domain-containing protein	232	PF00651	59..164
164	Homo sapiens	Chordata	Craniata	Mammalia	Primates	9606	Q9BS75	1.2e-08	38.4	0	3.1e-08	37.1	0	1.7	1	IPR000210(59...165)	unreviewed	BTB domain-containing protein	230	PF00651	59..164
165	Junco hyemalis	Chordata	Craniata	Aves	Passeriformes	40217	A0A8C5J8X7	1.4e-08	38.2	0	3.1e-08	37.1	0	1.6	1	IPR000210(59...165)	unreviewed	BTB domain-containing protein	232	PF00651	59..164
166	Moschus moschiferus	Chordata	Craniata	Mammalia	Artiodactyla	68415	A0A8C6MHY9	1.5e-08	38.2	0	3.1e-08	37.1	0	1.6	1	IPR000210(59...165)	unreviewed	BTB domain-containing protein	231	PF00651	59..164
167	Tachysurus vachellii	Chordata	Craniata	Actinopteri	Siluriformes	175792	A0AA88LWB6	1.2e-08	38.4	0.3	3.1e-08	37.1	0.3	1.8	1	IPR000210(14...116)	unreviewed	Uncharacterized protein	880	PF00651	14..111
168	Aotus nancymaae	Chordata	Craniata	Mammalia	Primates	37293	A0A2K5F5G4	1.4e-08	38.2	0	3.2e-08	37.1	0	1.7	1	IPR000210(53...159)	unreviewed	BTB domain-containing protein	235	PF00651	53..158
169	Equus caballus	Chordata	Craniata	Mammalia	Perissodactyla	9796	A0A9L0R3Z1	1.3e-08	38.3	0	3.2e-08	37	0	1.7	1	IPR000210(59...165)	unreviewed	BTB domain-containing protein	238	PF00651	59..164
170	Equus caballus	Chordata	Craniata	Mammalia	Perissodactyla	9796	A0A9L0TA76	1.6e-08	38.1	0	3.2e-08	37	0	1.6	1	IPR000210(59...165)	unreviewed	BTB domain-containing protein	239	PF00651	59..164
171	Macaca nemestrina	Chordata	Craniata	Mammalia	Primates	9545	A0A2K6DZB8	1.2e-08	38.4	0	3.2e-08	37	0	1.8	1	IPR000210(52...158)	unreviewed	BTB domain-containing protein	238	PF00651	52..157
172	Oncorhynchus mykiss	Chordata	Craniata	Actinopteri	Salmoniformes	8022	A0A060XLP6	4.9e-09	39.7	1.1	3.2e-08	37.1	0.3	2.5	1	IPR000210(31...138)	unreviewed	BTB domain-containing protein	222	PF00651	31..137
173	Salarias fasciatus	Chordata	Craniata	Actinopteri	Blenniiformes	181472	A0A672G8K6	5.2e-09	39.6	1.1	3.2e-08	37	0.3	2.4	1	IPR000210(46...153)	unreviewed	BTB domain-containing protein	223	PF00651	46..152
174	Strigops habroptila	Chordata	Craniata	Aves	Psittaciformes	2489341	A0A672UXM7	1.8e-08	37.8	0.3	3.2e-08	37.1	0.3	1.5	1	IPR000210(70...177)	unreviewed	BTB domain-containing protein	221	PF00651	70..176
175	Xenopus tropicalis	Chordata	Craniata	Amphibia	Anura	8364	B3DLB7	1.4e-08	38.2	0	3.2e-08	37.1	0	1.6	1	IPR000210(59...165)	unreviewed	BTB domain-containing protein	234	PF00651	59..164
176	Echeneis naucrates	Chordata	Craniata	Actinopteri	Carangiformes	173247	A0A665UHH3	1.6e-08	38	0	3.3e-08	37	0	1.6	1	IPR000210(65...171)	unreviewed	BTB domain-containing protein	241	PF00651	65..170
177	Equus asinus	Chordata	Craniata	Mammalia	Perissodactyla	9793	A0A9L0IB05	1.4e-08	38.2	0	3.3e-08	37	0	1.6	1	IPR000210(59...165)	unreviewed	BTB domain-containing protein	241	PF00651	59..164
178	Equus caballus	Chordata	Craniata	Mammalia	Perissodactyla	9796	A0A9L0RA46	1.4e-08	38.2	0	3.3e-08	37	0	1.6	1	IPR000210(59...165)	unreviewed	BTB domain-containing protein	241	PF00651	59..164
179	Strix occidentalis	Chordata	Craniata	Aves	Strigiformes	311401	A0A8D0EU84	6e-09	39.4	1.1	3.3e-08	37	0.3	2.3	1	IPR000210(71...178)	unreviewed	BTB domain-containing protein	229	PF00651	71..177
180	Xiphophorus couchianus	Chordata	Craniata	Actinopteri	Cyprinodontiformes	32473	A0A3B5KWB6	1.9e-08	37.8	0.2	3.3e-08	37	0.2	1.4	1	IPR000210(35...135)	unreviewed	BTB domain-containing protein	156	PF00651	35..127
181	Macaca mulatta	Chordata	Craniata	Mammalia	Primates	9544	H9H3W0	1.3e-08	38.3	0	3.4e-08	37	0	1.8	1	IPR000210(59...165)	unreviewed	BTB domain-containing protein	245	PF00651	59..164
182	Nothobranchius kadleci	Chordata	Craniata	Actinopteri	Cyprinodontiformes	1051664	A0A1A8D322	1.1e-08	38.5	0.6	3.4e-08	37	0.6	1.8	1	IPR000210(20...126)	unreviewed	BTB domain-containing protein	152	PF00651	20..122
183	Monodelphis domestica	Chordata	Craniata	Mammalia	Didelphimorphia	13616	A0A5F8GFB3	1.7e-08	38	0	3.5e-08	36.9	0	1.6	1	IPR000210(83...189)	unreviewed	BTB domain-containing protein	251	PF00651	83..188
184	Periophthalmus magnuspinnatus	Chordata	Craniata	Actinopteri	Gobiiformes	409849	A0A3B4A2Z2	3.5e-08	36.9	0.3	3.5e-08	36.9	0.3	3.4	1	IPR000210(69...176)	unreviewed	BTB domain-containing protein	236	PF00651	69..175
185	Poeciliopsis prolifica	Chordata	Craniata	Actinopteri	Cyprinodontiformes	188132	A0A0S7HZ37	1.7e-08	37.9	1.6	3.5e-08	36.9	0.2	2.1	1	IPR000210(16...118)	unreviewed	BTB domain-containing protein	163	PF00651	16..114
186	Poeciliopsis prolifica	Chordata	Craniata	Actinopteri	Cyprinodontiformes	188132	A0A0S7HZ38	1.7e-08	38	1.6	3.5e-08	36.9	0.2	2.2	1	IPR000210(14...116)	unreviewed	BTB domain-containing protein	161	PF00651	14..112
187	Pseudonaja textilis	Chordata	Craniata	Lepidosauria	Squamata	8673	A0A670YGJ6	6.6e-09	39.2	1.1	3.5e-08	36.9	0.3	2.3	1	IPR000210(68...175)	unreviewed	BTB domain-containing protein	238	PF00651	68..174
188	Anguilla anguilla	Chordata	Craniata	Actinopteri	Anguilliformes	7936	A0A9D3LMP7	1.7e-08	38	0.4	3.6e-08	36.9	0.4	1.5	1	IPR000210(13...120)	unreviewed	BTB domain-containing protein	571	PF00651	13..119
189	Arion vulgaris	Mollusca		Gastropoda	Stylommatophora	1028688	A0A0B6YB41	1.3e-08	38.3	0	3.6e-08	36.9	0	1.7	1	IPR000210(87...195)	unreviewed	BTB domain-containing protein	308	PF00651	87..194
190	Fundulus heteroclitus	Chordata	Craniata	Actinopteri	Cyprinodontiformes	8078	A0A3Q2P665	5.7e-09	39.4	1.1	3.6e-08	36.9	0.3	2.4	1	IPR000210(72...179)	unreviewed	BTB domain-containing protein	240	PF00651	72..178
191	Synaphobranchus kaupii	Chordata	Craniata	Actinopteri	Anguilliformes	118154	A0A9Q1IM37	1.7e-08	38	0.4	3.6e-08	36.9	0.4	1.5	1	IPR000210(14...121)	unreviewed	BTB domain-containing protein	572	PF00651	14..120
192	Zonotrichia albicollis	Chordata	Craniata	Aves	Passeriformes	44394	A0A8D2MA63	6.5e-09	39.3	1.1	3.6e-08	36.9	0.3	2.3	1	IPR000210(49...156)	unreviewed	BTB domain-containing protein	241	PF00651	49..155
193	Cyclopterus lumpus	Chordata	Craniata	Actinopteri	Perciformes	8103	A0A8C3AUA4	1.6e-08	38	0	3.8e-08	36.8	0	1.6	1	IPR000210(59...165)	unreviewed	BTB domain-containing protein	268	PF00651	59..164
194	Bambusicola thoracicus	Chordata	Craniata	Aves	Galliformes	9083	A0A2P4T9C0	2.3e-08	37.5	1.7	3.9e-08	36.8	1.7	1.3	1	IPR000210(30...72)	unreviewed	BTB domain-containing protein	72	PF00651	30..72
195	Callipepla squamata	Chordata	Craniata	Aves	Galliformes	9009	A0A226N0H3	2.3e-08	37.5	1.7	3.9e-08	36.8	1.7	1.3	1	IPR000210(30...72)	unreviewed	BTB domain-containing protein	72	PF00651	30..72
196	Carlito syrichta	Chordata	Craniata	Mammalia	Primates	1868482	A0A3Q0E5Q1	2.3e-08	37.5	0	3.9e-08	36.8	0	1.4	1	IPR000210(54...101)	unreviewed	BTB domain-containing protein	101	PF00651	54..96
197	Iconisemion striatum	Chordata	Craniata	Actinopteri	Cyprinodontiformes	60296	A0A1A7XPL1	1.9e-08	37.8	0.5	3.9e-08	36.8	0.5	1.6	1	IPR000210(53...160)	unreviewed	BTB domain-containing protein	603	PF00651	53..159
198	Iconisemion striatum	Chordata	Craniata	Actinopteri	Cyprinodontiformes	60296	A0A1A7YQ18	1.8e-08	37.8	0.5	3.9e-08	36.8	0.5	1.6	1	IPR000210(53...160)	unreviewed	BTB domain-containing protein	596	PF00651	53..159
199	Lamprotornis superbus	Chordata	Craniata	Aves	Passeriformes	245042	A0A835NE94	2.3e-08	37.5	1.7	3.9e-08	36.8	1.7	1.3	1	IPR000210(30...72)	unreviewed	BTB domain-containing protein	72	PF00651	30..72
200	Romanomermis culicivorax	Nematoda		Enoplea	Mermithida	13658	A0A915KDB5	3.9e-08	36.8	1.3	3.9e-08	36.8	1.3	3	1	IPR000210(33...140)	unreviewed	BTB domain-containing protein	316	PF00651	33..139
201	Salmo trutta	Chordata	Craniata	Actinopteri	Salmoniformes	8032	A0A674E5P7	3.9e-08	36.8	0.5	3.9e-08	36.8	0.5	2	1	IPR000210(14...116)	unreviewed	Zinc finger and BTB domain containing 17	716	PF00651	14..111
202	Bagarius yarrelli	Chordata	Craniata	Actinopteri	Siluriformes	175774	A0A556U623	2.8e-08	37.2	3.1	4e-08	36.7	1.2	2.1	1	IPR000210(30...133)	unreviewed	BTB domain-containing protein	586	PF00651	30..132
203	Branchiostoma floridae	Chordata	Cephalochordata	Leptocardii	Amphioxiformes	7739	C3Z954	1.8e-08	37.8	0.6	4e-08	36.8	0.6	1.5	1	IPR000210(2...105)	unreviewed	BTB domain-containing protein	507	PF00651	2..103
204	Lynx pardinus	Chordata	Craniata	Mammalia	Carnivora	191816	A0A485PDF6	2.5e-08	37.4	0.2	4e-08	36.7	0.2	1.4	1	IPR000210(14...68)	unreviewed	BTB domain-containing protein	68	PF00651	14..58
205	Pelobates cultripes	Chordata	Craniata	Amphibia	Anura	61616	A0AAD1SFL6	2.2e-08	37.6	0.3	4e-08	36.7	0.3	1.4	1	IPR000210(47...154)	unreviewed	Kelch 2 isoform X1	191	PF00651	47..153
206	Zosterops borbonicus	Chordata	Craniata	Aves	Passeriformes	364589	A0A8K1LEL7	2.4e-08	37.5	1.7	4e-08	36.7	1.7	1.3	1	IPR000210(31...73)	unreviewed	BTB domain-containing protein	73	PF00651	31..73
207	Homo sapiens	Chordata	Craniata	Mammalia	Primates	9606	J3QL74	1.6e-08	38	0.5	4.1e-08	36.7	0.5	1.7	1	IPR000210(26...132)	unreviewed	BTB domain-containing protein	165	PF00651	26..129
208	Pan troglodytes	Chordata	Craniata	Mammalia	Primates	9598	A0A2J8MP41	1.6e-08	38	0.5	4.1e-08	36.7	0.5	1.7	1	IPR000210(26...132)	unreviewed	BTB domain-containing protein	165	PF00651	26..129
209	Pongo abelii	Chordata	Craniata	Mammalia	Primates	9601	A0A2J8XGU7	1.6e-08	38	0.5	4.1e-08	36.7	0.5	1.7	1	IPR000210(26...132)	unreviewed	BTB domain-containing protein	165	PF00651	26..129
210	Malurus cyaneus	Chordata	Craniata	Aves	Passeriformes	2593467	A0A8C5U9X5	1.4e-08	38.2	2.3	4.3e-08	36.6	0.3	2.6	1	IPR000210(59...166)	unreviewed	BTB domain-containing protein	276	PF00651	59..165
211	Salmo trutta	Chordata	Craniata	Actinopteri	Salmoniformes	8032	A0A674E445	4.3e-08	36.6	0.5	4.3e-08	36.6	0.5	1.9	1	IPR000210(14...116)	unreviewed	Zinc finger and BTB domain containing 17	793	PF00651	14..111
212	Salmo trutta	Chordata	Craniata	Actinopteri	Salmoniformes	8032	A0A674E576	4.3e-08	36.7	0.5	4.3e-08	36.7	0.5	1.9	1	IPR000210(14...116)	unreviewed	Zinc finger and BTB domain containing 17	781	PF00651	14..111
213	Chloebia gouldiae	Chordata	Craniata	Aves	Passeriformes	44316	A0A3L8RVS0	2.9e-08	37.2	3.1	4.4e-08	36.6	1.2	2.1	1	IPR000210(30...177)	unreviewed	BTB domain-containing protein	560	PF00651	30..72,112..176
214	Branchiostoma floridae	Chordata	Cephalochordata	Leptocardii	Amphioxiformes	7739	A0A9J7L6R6	1.8e-08	37.9	0.6	4.6e-08	36.5	0.6	1.7	1	IPR000210(22...128)	unreviewed	BTB domain-containing protein	578	PF00651	22..126
215	Ciccaba nigrolineata	Chordata	Craniata	Aves	Strigiformes	1118524	A0A7K8UT91	3.3e-08	37	2.9	4.6e-08	36.6	1.1	2.1	1	IPR000210(34...148)	unreviewed	BTB domain-containing protein	601	PF00651	34..147
216	Pavo cristatus	Chordata	Craniata	Aves	Galliformes	9049	A0A8C9G3G4	9.9e-09	38.7	1.1	4.6e-08	36.5	0.3	2.3	1	IPR000210(30...137)	unreviewed	BTB domain-containing protein	290	PF00651	30..136
217	Pelobates cultripes	Chordata	Craniata	Amphibia	Anura	61616	A0AAD1SKJ9	2.3e-08	37.5	0.3	4.6e-08	36.5	0.3	1.5	1	IPR000210(42...149)	unreviewed	Kelch 2	212	PF00651	42..148
218	Podargus strigoides	Chordata	Craniata	Aves	Caprimulgiformes	8905	A0A7L4GDZ4	3.3e-08	37	2.9	4.6e-08	36.6	1.1	2.1	1	IPR000210(34...148)	unreviewed	BTB domain-containing protein	601	PF00651	34..147
219	Branchiostoma floridae	Chordata	Cephalochordata	Leptocardii	Amphioxiformes	7739	A0A9J7L5C8	1.8e-08	37.8	0.6	4.7e-08	36.5	0.6	1.7	1	IPR000210(26...132)	unreviewed	BTB domain-containing protein	582	PF00651	26..130
220	Malurus cyaneus	Chordata	Craniata	Aves	Passeriformes	2593467	A0A8C5X8L7	9.7e-09	38.7	1.1	4.7e-08	36.5	0.3	2.3	1	IPR000210(30...137)	unreviewed	BTB domain-containing protein	292	PF00651	30..136
221	Odocoileus virginianus	Chordata	Craniata	Mammalia	Artiodactyla	9880	A0A6J0Y363	2.2e-08	37.6	0.2	4.7e-08	36.5	0.2	1.5	1	IPR000210(46...153)	unreviewed	BTB domain-containing protein	205	PF00651	46..152
222	Salmo salar	Chordata	Craniata	Actinopteri	Salmoniformes	8030	A0A1S3MDA3	2.2e-08	37.5	0.5	4.7e-08	36.5	0.5	1.6	1	IPR000210(14...172)	unreviewed	Zinc finger and BTB domain-containing protein 17-like isoform X3	856	PF00651	14..58
223	Salmo trutta	Chordata	Craniata	Actinopteri	Salmoniformes	8032	A0A674E541	2.3e-08	37.5	0.5	4.7e-08	36.5	0.5	1.6	1	IPR000210(14...65)	unreviewed	Zinc finger and BTB domain containing 17	850	PF00651	14..58
224	Geodia barretti	Porifera		Demospongiae	Tetractinellida	519541	A0AA35TKZ3	1.9e-08	37.8	0	4.8e-08	36.5	0	1.7	1	IPR000210(53...160)	unreviewed	BTB domain-containing protein	609	PF00651	53..158
225	Pseudonaja textilis	Chordata	Craniata	Lepidosauria	Squamata	8673	A0A670YNE0	7.6e-09	39	1.1	4.8e-08	36.5	0.3	2.6	1	IPR000210(22...129)	unreviewed	BTB domain-containing protein	299	PF00651	22..128
226	Agelaius phoeniceus	Chordata	Craniata	Aves	Passeriformes	39638	A0A7K7KC25	1.6e-08	38	2.1	4.9e-08	36.5	0.7	2.3	1	IPR000210(34...140)	unreviewed	BTB domain-containing protein	299	PF00651	34..139
227	Echeneis naucrates	Chordata	Craniata	Actinopteri	Carangiformes	173247	A0A665X6S6	3.2e-08	37	0.4	4.9e-08	36.5	0.4	1.3	1	IPR000210(19...74)	unreviewed	BTB domain-containing protein	74	PF00651	19..62
228	Larimichthys crocea	Chordata	Craniata	Actinopteri		215358	A0A6G0IIN2	2.3e-08	37.5	0	4.9e-08	36.5	0	1.6	1	IPR000210(54...160)	unreviewed	BTB domain-containing protein	330	PF00651	54..159
	Mus spicilegus	Chordata	Craniata	Mammalia	Rodentia	10103	A0A8C6MUQ9	2.2e-08	37.6	0.1	4.9e-08	36.5	0.1	1.6	1	IPR000210(54...160)	unreviewed	BTB domain-containing protein	211	PF00651	54..159
	Pleuronectes platessa	Chordata	Craniata	Actinopteri	Pleuronectiformes	8262	A0A9N7V5Q6	2e-08	37.7	0.1	4.9e-08	36.4	0.1	1.7	1	IPR000210(60...166)	unreviewed	Zinc finger and BTB domain-containing protein 21	1033	PF00651	60..158
	Amazona guildingii	Chordata	Craniata	Aves	Psittaciformes	175529	A0A7L0ML89	4.6e-08	36.5	4.1	5e-08	36.4	1.9	2.1	1	IPR000210(32...146)	unreviewed	BTB domain-containing protein	599	PF00651	32..145
	Catharus ustulatus	Chordata	Craniata	Aves	Passeriformes	91951	A0A8C3UAQ7	5e-08	36.4	1.7	5e-08	36.4	1.7	1.7	1	IPR000210(47...83)	unreviewed	BTB domain-containing protein	83	PF00651	47..83
	Podilymbus podiceps	Chordata	Craniata	Aves	Podicipediformes	9252	A0A7L0SJ04	4.7e-08	36.5	4.1	5e-08	36.4	1.9	2.1	1	IPR000210(34...148)	unreviewed	BTB domain-containing protein	601	PF00651	34..147
	Accipiter nisus	Chordata	Craniata	Aves	Accipitriformes	211598	A0A8B9N5K4	1.1e-08	38.5	1.1	5.1e-08	36.4	0.3	2.3	1	IPR000210(30...137)	unreviewed	BTB domain-containing protein	311	PF00651	30..136
	Branchiostoma floridae	Chordata	Cephalochordata	Leptocardii	Amphioxiformes	7739	A0A9J7L7X7	2e-08	37.7	0.6	5.1e-08	36.4	0.6	1.7	1	IPR000210(72...178)	unreviewed	BTB domain-containing protein	628	PF00651	72..176
	Glaucidium brasilianum	Chordata	Craniata	Aves	Strigiformes	78217	A0A7L0REK6	4.6e-08	36.6	3.9	5.1e-08	36.4	1.8	2.1	1	IPR000210(34...148)	unreviewed	BTB domain-containing protein	601	PF00651	34..147
	Nothobranchius kadleci	Chordata	Craniata	Actinopteri	Cyprinodontiformes	1051664	A0A1A8D8Z7	2.2e-08	37.6	0.1	5.1e-08	36.4	0.1	1.6	1	IPR000210(37...144)	unreviewed	BTB domain-containing protein	306	PF00651	37..143
	Salmo salar	Chordata	Craniata	Actinopteri	Salmoniformes	8030	A0A1S3MDN3	1.8e-08	37.8	0.5	5.1e-08	36.4	0.5	1.8	1	IPR000210(14...116)	unreviewed	Zinc finger and BTB domain-containing protein 17-like isoform X1	916	PF00651	14..111
	Salmo salar	Chordata	Craniata	Actinopteri	Salmoniformes	8030	A0A1S3MDN5	1.8e-08	37.9	0.5	5.1e-08	36.4	0.5	1.8	1	IPR000210(14...116)	unreviewed	Zinc finger and BTB domain-containing protein 17-like isoform X2	909	PF00651	14..111
	Salmo trutta	Chordata	Craniata	Actinopteri	Salmoniformes	8032	A0A674E5C0	1.8e-08	37.8	0.5	5.1e-08	36.4	0.5	1.8	1	IPR000210(14...116)	unreviewed	Zinc finger and BTB domain containing 17	910	PF00651	14..111
	Zonotrichia albicollis	Chordata	Craniata	Aves	Passeriformes	44394	A0A8D2MD52	1.1e-08	38.6	1.1	5.1e-08	36.4	0.3	2.4	1	IPR000210(42...149)	unreviewed	BTB domain-containing protein	314	PF00651	42..148
	Salarias fasciatus	Chordata	Craniata	Actinopteri	Blenniiformes	181472	A0A672GUR9	1.1e-08	38.5	1.1	5.2e-08	36.4	0.3	2.3	1	IPR000210(40...147)	unreviewed	BTB domain-containing protein	316	PF00651	40..146
	Callipepla squamata	Chordata	Craniata	Aves	Galliformes	9009	A0A226MTG2	2.7e-08	37.3	0.2	5.3e-08	36.4	0.2	1.5	1	IPR000210(45...152)	unreviewed	BTB domain-containing protein	186	PF00651	45..151
	Ficedula albicollis	Chordata	Craniata	Aves	Passeriformes	59894	A0A803WG36	5.3e-08	36.4	0.3	5.3e-08	36.4	0.3	3.4	1	IPR000210(83...192)	unreviewed	BTB domain-containing protein	323	PF00651	83..191
	Heterocephalus glaber	Chordata	Craniata	Mammalia	Rodentia	10181	G5ART2	2.6e-08	37.3	0	5.3e-08	36.4	0	1.5	1	IPR000210(144...250)	unreviewed	BTB domain-containing protein	347	PF00651	144..249
	Oreochromis aureus	Chordata	Craniata	Actinopteri	Cichliformes	47969	A0A668SRP6	1.8e-08	37.9	0	5.3e-08	36.4	0	1.8	1	IPR000210(27...133)	unreviewed	BTB domain-containing protein	146	PF00651	27..129
	Oreochromis niloticus	Chordata	Craniata	Actinopteri	Cichliformes	8128	A0A669CLN5	1.8e-08	37.9	0	5.3e-08	36.4	0	1.8	1	IPR000210(27...133)	unreviewed	BTB domain-containing protein	146	PF00651	27..129
	Ardeotis kori	Chordata	Craniata	Aves	Gruiformes	89386	A0A7K8LA08	4.8e-08	36.5	3.8	5.4e-08	36.3	1.7	2.1	1	IPR000210(34...148)	unreviewed	BTB domain-containing protein	601	PF00651	34..147
	Chionis minor	Chordata	Craniata	Aves	Charadriiformes	227182	A0A7K7EXT8	4.8e-08	36.5	3.8	5.4e-08	36.3	1.7	2.1	1	IPR000210(34...148)	unreviewed	BTB domain-containing protein	601	PF00651	34..147
	Himantopus himantopus	Chordata	Craniata	Aves	Charadriiformes	225398	A0A7L1LMJ3	4.8e-08	36.5	3.8	5.4e-08	36.3	1.7	2.1	1	IPR000210(34...148)	unreviewed	BTB domain-containing protein	601	PF00651	34..147
	Ibidorhyncha struthersii	Chordata	Craniata	Aves	Charadriiformes	425643	A0A7K7UGF0	4.8e-08	36.5	3.8	5.4e-08	36.3	1.7	2.1	1	IPR000210(34...148)	unreviewed	BTB domain-containing protein	601	PF00651	34..147
	Panthera tigris	Chordata	Craniata	Mammalia	Carnivora	74533	A0A8C9JGC0	3.1e-08	37.1	0.1	5.4e-08	36.3	0.1	1.4	1	IPR000210(42...132)	unreviewed	BTB domain-containing protein	132	PF00651	42..123
	Platysternon megacephalum	Chordata	Craniata		Testudines	55544	A0A4D9EZY7	1.3e-08	38.3	0.4	5.4e-08	36.3	0.2	2.1	1	IPR000210(45...145)	unreviewed	BTB domain-containing protein	188	PF00651	45..145
	Pluvianellus socialis	Chordata	Craniata	Aves	Charadriiformes	227228	A0A7L3DF81	4.8e-08	36.5	3.8	5.4e-08	36.3	1.7	2.1	1	IPR000210(34...148)	unreviewed	BTB domain-containing protein	601	PF00651	34..147
	Bubo bubo	Chordata	Craniata	Aves	Strigiformes	30461	A0A8C0FS87	3.4e-08	37	0.3	5.6e-08	36.3	0.3	1.4	1	IPR000210(30...138)	unreviewed	BTB domain-containing protein	335	PF00651	30..125
	Pelecanus crispus	Chordata	Craniata	Aves	Pelecaniformes	36300	A0A091T2P5	4.8e-08	36.5	3.8	5.6e-08	36.3	1.7	2.1	1	IPR000210(34...148)	unreviewed	BTB domain-containing protein	615	PF00651	34..147
	Ranitomeya imitator	Chordata	Craniata	Amphibia	Anura	111125	A0A822HJY7	1.5e-08	38.1	0.4	5.6e-08	36.3	0.5	1.9	1	IPR000210(26...132)	unreviewed	BTB domain-containing protein	205	PF00651	26..129
	Buceros rhinoceros	Chordata	Craniata	Aves	Bucerotiformes	175836	A0A091HBB0	2.7e-08	37.3	0	5.8e-08	36.2	0	1.6	1	IPR000210(52...158)	unreviewed	BTB domain-containing protein	376	PF00651	52..157
	Actinia tenebrosa	Cnidaria		Anthozoa	Actiniaria	6105	A0A6P8IX81	2.7e-08	37.3	0.1	6e-08	36.2	0.1	1.6	1	IPR000210(32...137)	unreviewed	BTB domain-containing protein	572	PF00651	32..136
	Bos indicus	Chordata	Craniata	Mammalia	Artiodactyla	30522	A0A4W2EXW3	3.8e-08	36.8	0.1	6.1e-08	36.2	0.1	1.3	1	IPR000210(53...143)	unreviewed	BTB domain-containing protein	143	PF00651	53..134
	Bos indicus	Chordata	Craniata	Mammalia	Artiodactyla	30522	A0A4W2HMH8	3.7e-08	36.8	0.1	6.1e-08	36.2	0.1	1.3	1	IPR000210(53...143)	unreviewed	BTB domain-containing protein	143	PF00651	53..134
	Canis lupus	Chordata	Craniata	Mammalia	Carnivora	9615	A0A8C0NJU1	3.7e-08	36.8	0.1	6.1e-08	36.2	0.1	1.3	1	IPR000210(53...143)	unreviewed	BTB domain-containing protein	143	PF00651	53..134
	Catagonus wagneri	Chordata	Craniata	Mammalia	Artiodactyla	51154	A0A8C3XAW3	3.7e-08	36.8	0.1	6.1e-08	36.2	0.1	1.3	1	IPR000210(53...141)	unreviewed	BTB domain-containing protein	143	PF00651	53..134
	Panthera leo	Chordata	Craniata	Mammalia	Carnivora	9689	A0A8C8W9Y9	3.8e-08	36.8	0.1	6.1e-08	36.2	0.1	1.3	1	IPR000210(53...140)	unreviewed	BTB domain-containing protein	143	PF00651	53..134
	Homo sapiens	Chordata	Craniata	Mammalia	Primates	9606	J3QLI2	2.6e-08	37.3	0.5	6.2e-08	36.1	0.5	1.6	1	IPR000210(26...132)	unreviewed	BTB domain-containing protein	221	PF00651	26..129
	Pan troglodytes	Chordata	Craniata	Mammalia	Primates	9598	A0A2J8MP21	2.6e-08	37.3	0.5	6.2e-08	36.1	0.5	1.6	1	IPR000210(26...132)	unreviewed	BTB domain-containing protein	221	PF00651	26..129
	Pongo abelii	Chordata	Craniata	Mammalia	Primates	9601	A0A2J8XGU6	2.6e-08	37.3	0.5	6.2e-08	36.1	0.5	1.6	1	IPR000210(26...132)	unreviewed	BTB domain-containing protein	221	PF00651	26..129
	Sus scrofa	Chordata	Craniata	Mammalia	Artiodactyla	9823	A0A8D0JXW9	3.9e-08	36.8	0.1	6.2e-08	36.1	0.1	1.3	1	IPR000210(55...143)	unreviewed	BTB domain-containing protein	145	PF00651	55..136
	Gorilla gorilla	Chordata	Craniata	Mammalia	Primates	9595	G3QHD4	2.9e-08	37.2	0.4	6.3e-08	36.1	0.4	1.5	1	IPR000210(43...136)	unreviewed	BTB domain-containing protein	576	PF00651	43..85
	Prolemur simus	Chordata	Craniata	Mammalia	Primates	1328070	A0A8C8YFA8	3.9e-08	36.8	0.1	6.3e-08	36.1	0.1	1.3	1	IPR000210(55...144)	unreviewed	BTB domain-containing protein	146	PF00651	55..136
	Sciurus vulgaris	Chordata	Craniata	Mammalia	Rodentia	55149	A0A8D2JMF1	3.8e-08	36.8	0.1	6.3e-08	36.1	0.1	1.3	1	IPR000210(55...144)	unreviewed	BTB domain-containing protein	146	PF00651	55..136
	Scophthalmus maximus	Chordata	Craniata	Actinopteri	Pleuronectiformes	52904	A0A8D3CV18	2.6e-08	37.4	0.1	6.3e-08	36.1	0.1	1.7	1	IPR000210(17...119)	unreviewed	Zinc finger and BTB domain containing 17	688	PF00651	17..114
	Kryptolebias marmoratus	Chordata	Craniata	Actinopteri	Cyprinodontiformes	37003	A0A3Q2ZNV9	2.9e-08	37.2	0.2	6.4e-08	36.1	0.2	1.6	1	IPR000210(24...126)	unreviewed	BTB domain-containing protein	144	PF00651	24..119
	Conger conger	Chordata	Craniata	Actinopteri	Anguilliformes	82655	A0A9Q1HPP3	3e-08	37.1	0.1	6.5e-08	36.1	0.1	1.5	1	IPR000210(9...115)	unreviewed	BTB domain-containing protein	553	PF00651	9..114
	Danionella translucida	Chordata	Craniata	Actinopteri	Cypriniformes	623744	A0A553RJX5	2.3e-08	37.5	0.2	6.5e-08	36.1	0.2	1.8	1	IPR000210(14...116)	unreviewed	BTB domain-containing protein	779	PF00651	14..111
	Lottia gigantea	Mollusca		Gastropoda		225164	V3ZP23	2.4e-08	37.4	0	6.7e-08	36	0	1.7	1	IPR000210(21...126)	unreviewed	BTB domain-containing protein	244	PF00651	21..123
	Macaca mulatta	Chordata	Craniata	Mammalia	Primates	9544	H9FKT6	3.3e-08	37	1.8	6.7e-08	36	0.2	2.3	1	IPR000210(2...105)	unreviewed	BTB domain-containing protein	221	PF00651	2..104
	Nematostella vectensis	Cnidaria		Anthozoa	Actiniaria	45351	A7SZP9	2.2e-08	37.6	0	6.7e-08	36	0	1.9	1	IPR000210(29...136)	unreviewed	BTB domain-containing protein	544	PF00651	29..133
	Nothoprocta perdicaria	Chordata	Craniata	Aves	Tinamiformes	30464	A0A8C6ZFS9	3.3e-08	37	0.1	6.7e-08	36	0.1	1.5	1	IPR000210(14...117)	unreviewed	BTB domain-containing protein	132	PF00651	14..111
	Scophthalmus maximus	Chordata	Craniata	Actinopteri	Pleuronectiformes	52904	A0A8D3CL00	6.7e-08	36	0.1	6.7e-08	36	0.1	2	1	IPR000210(14...116)	unreviewed	Zinc finger and BTB domain-containing protein 17	727	PF00651	14..111
	Mus musculus	Chordata	Craniata	Mammalia	Rodentia	10090	A0A804C8S8	3.3e-08	37	0.2	6.8e-08	36	0.2	1.6	1	IPR000210(81...187)	unreviewed	BTB domain-containing protein	222	PF00651	81..186
	Sus scrofa	Chordata	Craniata	Mammalia	Artiodactyla	9823	A0A8D1V8K1	2.8e-08	37.2	0	6.8e-08	36	0	1.7	1	IPR000210(238...344)	unreviewed	BTB domain-containing protein	426	PF00651	238..343
	Poeciliopsis prolifica	Chordata	Craniata	Actinopteri	Cyprinodontiformes	188132	A0A0S7I2Z2	6.9e-08	36	0.2	6.9e-08	36	0.2	2	1	IPR000210(142...244)	unreviewed	BTB domain-containing protein	261	PF00651	142..240
	Rattus norvegicus	Chordata	Craniata	Mammalia	Rodentia	10116	A6ID76	3.4e-08	37	0	6.9e-08	36	0	1.5	1	IPR000210(59...165)	unreviewed	BTB domain-containing protein	432	PF00651	59..164
	Scophthalmus maximus	Chordata	Craniata	Actinopteri	Pleuronectiformes	52904	A0A6A4T0F5	6.9e-08	36	0.1	6.9e-08	36	0.1	1.9	1	IPR000210(14...116)	unreviewed	Zinc finger and BTB domain-containing protein 17	746	PF00651	14..111
	Takifugu bimaculatus	Chordata	Craniata	Actinopteri	Tetraodontiformes	433685	A0A4Z2BZY6	3.4e-08	37	0	6.9e-08	36	0	1.5	1	IPR000210(59...165)	unreviewed	BTB domain-containing protein	433	PF00651	59..164
	Kryptolebias marmoratus	Chordata	Craniata	Actinopteri	Cyprinodontiformes	37003	A0A3Q3AVA6	4.6e-08	36.5	0.2	7e-08	36	0.2	1.4	1	IPR000210(23...88)	unreviewed	BTB domain-containing protein	88	PF00651	23..71
	Phyllostomus discolor	Chordata	Craniata	Mammalia	Chiroptera	89673	A0A833YF92	3.5e-08	36.9	0	7e-08	36	0	1.5	1	IPR000210(59...165)	unreviewed	BTB domain-containing protein	441	PF00651	59..164
	Sus scrofa	Chordata	Craniata	Mammalia	Artiodactyla	9823	A0A8D0KJ53	4e-08	36.7	0.2	7e-08	36	0.2	1.4	1	IPR000210(14...57)	unreviewed	BTB domain-containing protein	66	PF00651	14..57
	Todus mexicanus	Chordata	Craniata	Aves	Coraciiformes	135184	A0A851DK68	6.8e-08	36	4.3	7.1e-08	36	2.1	2.1	1	IPR000210(34...148)	unreviewed	BTB domain-containing protein	601	PF00651	34..147
	Danio rerio	Chordata	Craniata	Actinopteri	Cypriniformes	7955	A0A8M1RTI7	2.7e-08	37.3	0.2	7.2e-08	35.9	0.2	1.8	1	IPR000210(14...116)	unreviewed	Zinc finger and BTB domain-containing 17	856	PF00651	14..111
	Danio rerio	Chordata	Craniata	Actinopteri	Cypriniformes	7955	A0A8M3AVG3	2.8e-08	37.3	0.2	7.2e-08	35.9	0.2	1.8	1	IPR000210(14...116)	unreviewed	Zinc finger and BTB domain-containing 17	855	PF00651	14..111
	Leptonychotes weddellii	Chordata	Craniata	Mammalia	Carnivora	9713	A0A7F8QXT5	3.7e-08	36.9	0	7.2e-08	35.9	0	1.5	1	IPR000210(59...165)	unreviewed	BTB domain-containing protein	448	PF00651	59..164
	Callorhinchus milii	Chordata	Craniata	Chondrichthyes	Chimaeriformes	7868	A0A4W3I4Z0	4.6e-08	36.5	0.6	7.3e-08	35.9	0.6	1.3	1	IPR000210(22...103)	unreviewed	BTB domain-containing protein	103	PF00651	22..102
	Ovis ammon	Chordata	Craniata	Mammalia	Artiodactyla	230172	A0AAD4U9F6	3.2e-08	37.1	0.2	7.3e-08	35.9	0.2	1.6	1	IPR000210(8...115)	unreviewed	Uncharacterized protein	288	PF00651	8..114
	Anabarilius grahami	Chordata	Craniata	Actinopteri	Cypriniformes	495550	A0A3N0YSA9	3e-08	37.1	0.7	7.4e-08	35.9	0.7	1.7	1	IPR000210(13...120)	unreviewed	BTB domain-containing protein	583	PF00651	13..119
	Ditylenchus dipsaci	Nematoda		Chromadorea	Rhabditida	166011	A0A915D076	1e-08	38.6	2.2	7.4e-08	35.9	0.1	2.7	1	IPR000210(38...141)	unreviewed	Uncharacterized protein	967	PF00651	38..138
	Micrurus lemniscatus	Chordata	Craniata	Lepidosauria	Squamata	129467	A0A2D4HIJ5	3.6e-08	36.9	0	7.4e-08	35.9	0	1.5	1	IPR000210(59...165)	unreviewed	BTB domain-containing protein	459	PF00651	59..164
	Ranitomeya imitator	Chordata	Craniata	Amphibia	Anura	111125	A0A821GTZ4	3.7e-08	36.9	0	7.4e-08	35.9	0	1.5	1	IPR000210(17...123)	unreviewed	BTB domain-containing protein	458	PF00651	17..122
	Callorhinchus milii	Chordata	Craniata	Chondrichthyes	Chimaeriformes	7868	A0A4W3H3Y3	3.6e-08	36.9	0	7.5e-08	35.9	0	1.5	1	IPR000210(41...147)	unreviewed	BTB domain-containing protein	464	PF00651	41..146
	Cyprinus carpio	Chordata	Craniata	Actinopteri	Cypriniformes	7962	A0A8C1LIP1	3.9e-08	36.8	0	7.5e-08	35.9	0	1.5	1	IPR000210(41...147)	unreviewed	BTB domain-containing protein	462	PF00651	41..146
	Neotoma lepida	Chordata	Craniata	Mammalia	Rodentia	56216	A0A1A6HDL2	4.1e-08	36.7	0	7.5e-08	35.9	0	1.4	1	IPR000210(17...111)	unreviewed	BTB domain-containing protein	467	PF00651	17..100
	Oryzias sinensis	Chordata	Craniata	Actinopteri	Beloniformes	183150	A0A8C7XYC1	3.9e-08	36.8	0	7.5e-08	35.9	0	1.5	1	IPR000210(41...147)	unreviewed	BTB domain-containing protein	466	PF00651	41..146
	Scophthalmus maximus	Chordata	Craniata	Actinopteri	Pleuronectiformes	52904	A0A8D3BYX3	7.6e-08	35.8	0.1	7.6e-08	35.8	0.1	1.9	1	IPR000210(14...116)	unreviewed	Zinc finger and BTB domain-containing protein 17	815	PF00651	14..111
	Neogobius melanostomus	Chordata	Craniata	Actinopteri	Gobiiformes	47308	A0A8C6TU02	4.2e-08	36.7	0	7.7e-08	35.8	0	1.4	1	IPR000210(14...117)	unreviewed	BTB domain-containing protein	477	PF00651	14..116
	Periophthalmus magnuspinnatus	Chordata	Craniata	Actinopteri	Gobiiformes	409849	A0A3B4B2J2	3.9e-08	36.8	0	7.7e-08	35.8	0	1.5	1	IPR000210(41...147)	unreviewed	BTB domain-containing protein	475	PF00651	41..146
	Pteropus alecto	Chordata	Craniata	Mammalia	Chiroptera	9402	L5L7Z4	3.4e-08	37	0.2	7.7e-08	35.8	0.2	1.7	1	IPR000210(55...155)	unreviewed	BTB domain-containing protein	244	PF00651	55..135
	Scophthalmus maximus	Chordata	Craniata	Actinopteri	Pleuronectiformes	52904	A0A8D3D5X8	4e-08	36.7	0	7.7e-08	35.8	0	1.5	1	IPR000210(41...147)	unreviewed	BTB domain-containing protein	473	PF00651	41..146
	Sphaeramia orbicularis	Chordata	Craniata	Actinopteri	Kurtiformes	375764	A0A673CCQ6	4e-08	36.8	0	7.7e-08	35.8	0	1.5	1	IPR000210(41...147)	unreviewed	BTB domain-containing protein	477	PF00651	41..146
	Cyprinus carpio	Chordata	Craniata	Actinopteri	Cypriniformes	7962	A0A8C2INV6	3.9e-08	36.8	0	7.8e-08	35.8	0	1.5	1	IPR000210(43...147)	unreviewed	BTB domain-containing protein	480	PF00651	43..146
	Microtus ochrogaster	Chordata	Craniata	Mammalia	Rodentia	79684	A0A8J6G5Y3	3e-08	37.2	0.9	7.8e-08	35.8	0.9	1.7	1	IPR000210(208...270)	unreviewed	Heterogeneous nuclear ribonucleoprotein A0	308	PF00651	208..244
	Oncorhynchus mykiss	Chordata	Craniata	Actinopteri	Salmoniformes	8022	A0A8C7RWA8	4.1e-08	36.7	0	7.8e-08	35.8	0	1.5	1	IPR000210(41...147)	unreviewed	BTB domain-containing protein	480	PF00651	41..146
	Oncorhynchus tshawytscha	Chordata	Craniata	Actinopteri	Salmoniformes	74940	A0A8C8F4I5	4.1e-08	36.7	0	7.8e-08	35.8	0	1.5	1	IPR000210(41...147)	unreviewed	BTB domain-containing protein	480	PF00651	41..146
	Sinocyclocheilus rhinocerous	Chordata	Craniata	Actinopteri	Cypriniformes	307959	A0A673GAK1	4.1e-08	36.7	0	7.8e-08	35.8	0	1.5	1	IPR000210(41...147)	unreviewed	BTB domain-containing protein	480	PF00651	41..146
	Callorhinchus milii	Chordata	Craniata	Chondrichthyes	Chimaeriformes	7868	A0A4W3JLF3	5.5e-08	36.3	0	7.9e-08	35.8	0	1.3	1	IPR000210(19...76)	unreviewed	BTB domain-containing protein	76	PF00651	19..68
	Cyprinus carpio	Chordata	Craniata	Actinopteri	Cypriniformes	630221	A0A9J7XHY5	3.8e-08	36.8	0	7.9e-08	35.8	0	1.5	1	IPR000210(41...147)	unreviewed	BTB domain-containing protein	485	PF00651	41..146
	Nothobranchius pienaari	Chordata	Craniata	Actinopteri	Cyprinodontiformes	704102	A0A1A8MEQ6	3.4e-08	37	0.1	7.9e-08	35.8	0.1	1.6	1	IPR000210(19...126)	unreviewed	BTB domain-containing protein	436	PF00651	19..125
	Podarcis lilfordi	Chordata	Craniata	Lepidosauria	Squamata	74358	A0AA35P987	3.6e-08	36.9	0	7.9e-08	35.8	0	1.6	1	IPR000210(59...165)	unreviewed	BTB domain-containing protein	483	PF00651	59..164
	Poeciliopsis prolifica	Chordata	Craniata	Actinopteri	Cyprinodontiformes	188132	A0A0S7I2U4	7.9e-08	35.8	0.2	7.9e-08	35.8	0.2	1.9	1	IPR000210(142...244)	unreviewed	BTB domain-containing protein	289	PF00651	142..240
	Pundamilia nyererei	Chordata	Craniata	Actinopteri	Cichliformes	303518	A0A3B4G1T3	4.1e-08	36.7	0	7.9e-08	35.8	0	1.5	1	IPR000210(41...147)	unreviewed	BTB domain-containing protein	485	PF00651	41..146
	Salarias fasciatus	Chordata	Craniata	Actinopteri	Blenniiformes	181472	A0A672JMR0	4e-08	36.7	0	8e-08	35.8	0	1.5	1	IPR000210(41...147)	unreviewed	BTB domain-containing protein	488	PF00651	41..146
	Scophthalmus maximus	Chordata	Craniata	Actinopteri	Pleuronectiformes	52904	A0A8D3A8V8	8e-08	35.8	0.1	8e-08	35.8	0.1	1.9	1	IPR000210(14...116)	unreviewed	Zinc finger and BTB domain-containing protein 17	851	PF00651	14..111
	Lynx pardinus	Chordata	Craniata	Mammalia	Carnivora	191816	A0A485PTY6	4.2e-08	36.7	0	8.2e-08	35.7	0	1.5	1	IPR000210(59...165)	unreviewed	BTB domain-containing protein	501	PF00651	59..164
	Oncorhynchus mykiss	Chordata	Craniata	Actinopteri	Salmoniformes	8022	A0A8C7VDJ7	4.3e-08	36.6	0	8.2e-08	35.8	0	1.5	1	IPR000210(41...147)	unreviewed	BTB domain-containing protein	499	PF00651	41..146
	Spermophilus dauricus	Chordata	Craniata	Mammalia	Rodentia	99837	A0A8C9PT00	4e-08	36.7	0.1	8.2e-08	35.8	0.1	1.5	1	IPR000210(37...142)	unreviewed	BTB domain-containing protein	175	PF00651	37..137
	Echeneis naucrates	Chordata	Craniata	Actinopteri	Carangiformes	173247	A0A665UHQ2	4.1e-08	36.7	0	8.3e-08	35.7	0	1.5	1	IPR000210(41...147)	unreviewed	BTB domain-containing protein	506	PF00651	41..146
	Semnornis frantzii	Chordata	Craniata	Aves	Piciformes	91796	A0A7L2I3S9	3.4e-08	37	2.1	8.3e-08	35.7	0.7	2.3	1	IPR000210(33...139)	unreviewed	BTB domain-containing protein	450	PF00651	33..138
	Takifugu rubripes	Chordata	Craniata	Actinopteri	Tetraodontiformes	31033	A0A674MEJ1	4.2e-08	36.7	0	8.3e-08	35.7	0	1.5	1	IPR000210(41...147)	unreviewed	BTB domain-containing protein	506	PF00651	41..146
	Albula glossodonta	Chordata	Craniata	Actinopteri	Albuliformes	121402	A0A8T2N2B3	3.4e-08	37	0.3	8.4e-08	35.7	0.3	1.7	1	IPR000210(46...153)	unreviewed	BTB domain-containing protein	603	PF00651	46..152
	Astyanax mexicanus	Chordata	Craniata	Actinopteri	Characiformes	7994	A0A8B9RP07	4.4e-08	36.6	0	8.4e-08	35.7	0	1.5	1	IPR000210(41...147)	unreviewed	BTB domain-containing protein	513	PF00651	41..146
	Cyprinodon variegatus	Chordata	Craniata	Actinopteri	Cyprinodontiformes	28743	A0A3Q2DRC0	4.4e-08	36.6	0	8.4e-08	35.7	0	1.5	1	IPR000210(41...147)	unreviewed	BTB domain-containing protein	513	PF00651	41..146
	Cyprinus carpio	Chordata	Craniata	Actinopteri	Cypriniformes	630221	A0A8C1AMZ5	4.4e-08	36.6	0	8.4e-08	35.7	0	1.5	1	IPR000210(43...147)	unreviewed	BTB domain-containing protein	513	PF00651	43..146
	Cyprinus carpio	Chordata	Craniata	Actinopteri	Cypriniformes	7962	A0A8C1N7A6	4.4e-08	36.6	0	8.4e-08	35.7	0	1.5	1	IPR000210(43...147)	unreviewed	BTB domain-containing protein	513	PF00651	43..146
	Cyprinus carpio	Chordata	Craniata	Actinopteri	Cypriniformes	7962	A0A8C2D284	4.4e-08	36.6	0	8.4e-08	35.7	0	1.5	1	IPR000210(41...147)	unreviewed	BTB domain-containing protein	513	PF00651	41..146
	Danio rerio	Chordata	Craniata	Actinopteri	Cypriniformes	7955	Q6PFL3	4.4e-08	36.6	0	8.4e-08	35.7	0	1.5	1	IPR000210(42...147)	unreviewed	BTB domain-containing protein	513	PF00651	42..146
	Denticeps clupeoides	Chordata	Craniata	Actinopteri	Clupeiformes	299321	A0A8C4FJC8	4.4e-08	36.6	0	8.4e-08	35.7	0	1.5	1	IPR000210(41...147)	unreviewed	BTB domain-containing protein	513	PF00651	41..146
	Dicentrarchus labrax	Chordata	Craniata	Actinopteri		13489	A0A8P4K946	4.4e-08	36.6	0	8.4e-08	35.7	0	1.5	1	IPR000210(41...147)	unreviewed	BTB domain-containing protein	513	PF00651	41..146
	Electrophorus electricus	Chordata	Craniata	Actinopteri	Gymnotiformes	8005	A0A4W4FDW7	4.4e-08	36.6	0	8.4e-08	35.7	0	1.5	1	IPR000210(41...147)	unreviewed	BTB domain-containing protein	513	PF00651	41..146
	Esox lucius	Chordata	Craniata	Actinopteri	Esociformes	8010	A0A6Q2X047	4.4e-08	36.6	0	8.4e-08	35.7	0	1.5	1	IPR000210(41...147)	unreviewed	BTB domain-containing protein	513	PF00651	41..146
	Gadus morhua	Chordata	Craniata	Actinopteri	Gadiformes	8049	A0A8C5FDL5	4.4e-08	36.6	0	8.4e-08	35.7	0	1.5	1	IPR000210(41...147)	unreviewed	BTB domain-containing protein	513	PF00651	41..146
	Gouania willdenowi	Chordata	Craniata	Actinopteri	Blenniiformes	441366	A0A8C5I009	4.4e-08	36.6	0	8.4e-08	35.7	0	1.5	1	IPR000210(41...147)	unreviewed	BTB domain-containing protein	513	PF00651	41..146
	Gulo gulo	Chordata	Craniata	Mammalia	Carnivora	48420	A0A9X9LZR9	3.7e-08	36.9	0.5	8.4e-08	35.7	0.5	1.6	1	IPR000210(26...132)	unreviewed	BTB domain-containing protein	274	PF00651	26..129
	Hucho hucho	Chordata	Craniata	Actinopteri	Salmoniformes	62062	A0A4W5QL44	4.4e-08	36.6	0	8.4e-08	35.7	0	1.5	1	IPR000210(41...147)	unreviewed	BTB domain-containing protein	513	PF00651	41..146
	Lates calcarifer	Chordata	Craniata	Actinopteri		8187	A0A4W6CX15	4.4e-08	36.6	0	8.4e-08	35.7	0	1.5	1	IPR000210(41...147)	unreviewed	BTB domain-containing protein	513	PF00651	41..146
	Mastacembelus armatus	Chordata	Craniata	Actinopteri	Synbranchiformes	205130	A0A7N8X1Z8	4.4e-08	36.6	0	8.4e-08	35.7	0	1.5	1	IPR000210(41...147)	unreviewed	BTB domain-containing protein	513	PF00651	41..146
	Maylandia zebra	Chordata	Craniata	Actinopteri	Cichliformes	106582	A0A3P9CAW9	4.4e-08	36.6	0	8.4e-08	35.7	0	1.5	1	IPR000210(41...147)	unreviewed	BTB domain-containing protein	513	PF00651	41..146
	Myripristis murdjan	Chordata	Craniata	Actinopteri	Holocentriformes	586833	A0A667XK48	4.4e-08	36.6	0	8.4e-08	35.7	0	1.5	1	IPR000210(41...147)	unreviewed	BTB domain-containing protein	512	PF00651	41..146
	Neolamprologus brichardi	Chordata	Craniata	Actinopteri	Cichliformes	32507	A0A3Q4M3Q0	4.4e-08	36.6	0	8.4e-08	35.7	0	1.5	1	IPR000210(41...147)	unreviewed	BTB domain-containing protein	513	PF00651	41..146
	Oreochromis niloticus	Chordata	Craniata	Actinopteri	Cichliformes	8128	A0A669DE32	4.4e-08	36.6	0	8.4e-08	35.7	0	1.5	1	IPR000210(41...147)	unreviewed	BTB domain-containing protein	513	PF00651	41..146
	Salmo trutta	Chordata	Craniata	Actinopteri	Salmoniformes	8032	A0A673Z4A9	4.4e-08	36.6	0	8.4e-08	35.7	0	1.5	1	IPR000210(41...147)	unreviewed	BTB domain-containing protein	513	PF00651	41..146
	Sander lucioperca	Chordata	Craniata	Actinopteri	Perciformes	283035	A0A8C9Z797	4.4e-08	36.6	0	8.4e-08	35.7	0	1.5	1	IPR000210(41...147)	unreviewed	BTB domain-containing protein	513	PF00651	41..146
	Scleropages formosus	Chordata	Craniata	Actinopteri	Osteoglossiformes	113540	A0A8C9SCD7	4.4e-08	36.6	0	8.4e-08	35.7	0	1.5	1	IPR000210(41...147)	unreviewed	BTB domain-containing protein	513	PF00651	41..146
	Sinocyclocheilus anshuiensis	Chordata	Craniata	Actinopteri	Cypriniformes	1608454	A0A671RSP0	4.4e-08	36.6	0	8.4e-08	35.7	0	1.5	1	IPR000210(41...147)	unreviewed	BTB domain-containing protein	513	PF00651	41..146
	Sinocyclocheilus grahami	Chordata	Craniata	Actinopteri	Cypriniformes	75366	A0A672N333	4.4e-08	36.6	0	8.4e-08	35.7	0	1.5	1	IPR000210(41...147)	unreviewed	BTB domain-containing protein	513	PF00651	41..146
	Sinocyclocheilus grahami	Chordata	Craniata	Actinopteri	Cypriniformes	75366	A0A672PKG4	4.4e-08	36.6	0	8.4e-08	35.7	0	1.5	1	IPR000210(41...147)	unreviewed	BTB domain-containing protein	513	PF00651	41..146
	Sinocyclocheilus rhinocerous	Chordata	Craniata	Actinopteri	Cypriniformes	307959	A0A673FV78	4.4e-08	36.6	0	8.4e-08	35.7	0	1.5	1	IPR000210(41...147)	unreviewed	BTB domain-containing protein	513	PF00651	41..146
	Albula goreensis	Chordata	Craniata	Actinopteri	Albuliformes	1534307	A0A8T3CFU7	4.3e-08	36.6	0	8.5e-08	35.7	0	1.5	1	IPR000210(59...165)	unreviewed	BTB domain-containing protein	516	PF00651	59..164
	Apteryx mantelli	Chordata	Craniata	Aves	Apterygiformes	202946	A0A8B7JF37	4.3e-08	36.6	0	8.5e-08	35.7	0	1.5	1	IPR000210(59...165)	unreviewed	BTB domain-containing protein	514	PF00651	59..164
	Poecilia reticulata	Chordata	Craniata	Actinopteri	Cyprinodontiformes	8081	A0A3P9PLN0	4.4e-08	36.6	0	8.5e-08	35.7	0	1.5	1	IPR000210(41...147)	unreviewed	BTB domain-containing protein	515	PF00651	41..146
	Eptatretus burgeri	Chordata	Craniata	Myxini	Myxiniformes	7764	A0A8C4R7N4	4.1e-08	36.7	0.2	8.6e-08	35.7	0.2	1.5	1	IPR000210(42...149)	unreviewed	BTB domain-containing protein	593	PF00651	42..148
	Gallus gallus	Chordata	Craniata	Aves	Galliformes	9031	A0A8V0ZK00	2.6e-08	37.4	1.1	8.6e-08	35.7	0.3	2.2	1	IPR000210(30...137)	unreviewed	BTB domain-containing protein	476	PF00651	30..136
	Scophthalmus maximus	Chordata	Craniata	Actinopteri	Pleuronectiformes	52904	A0A8D3DHY4	2.9e-08	37.2	0.1	8.6e-08	35.7	0.1	1.9	1	IPR000210(14...174)	unreviewed	Zinc finger and BTB domain-containing protein 17	909	PF00651	14..58,127..169
	Scytalopus superciliaris	Chordata	Craniata	Aves	Passeriformes	312124	A0A7L1YYH6	4.6e-08	36.5	0.1	8.7e-08	35.7	0.1	1.5	1	IPR000210(14...111)	unreviewed	BTB domain-containing protein	111	PF00651	14..109
	Sinocyclocheilus anshuiensis	Chordata	Craniata	Actinopteri	Cypriniformes	1608454	A0A671MUB2	4.4e-08	36.6	0	8.7e-08	35.7	0	1.5	1	IPR000210(55...161)	unreviewed	BTB domain-containing protein	525	PF00651	55..160
	Sinocyclocheilus anshuiensis	Chordata	Craniata	Actinopteri	Cypriniformes	1608454	A0A671MYE9	4.4e-08	36.6	0	8.7e-08	35.7	0	1.5	1	IPR000210(56...162)	unreviewed	BTB domain-containing protein	526	PF00651	56..161
	Takifugu rubripes	Chordata	Craniata	Actinopteri	Tetraodontiformes	31033	A0A674NER7	4.3e-08	36.6	0	8.7e-08	35.7	0	1.5	1	IPR000210(30...136)	unreviewed	BTB domain-containing protein	526	PF00651	30..135
	Eptesicus nilssonii	Chordata	Craniata	Mammalia	Chiroptera	59451	A0AA40I5W2	8.8e-08	35.6	0.2	8.8e-08	35.6	0.2	1.9	1	IPR000210(90...197)	unreviewed	BTB domain-containing protein	334	PF00651	90..196
	Petromyzon marinus	Chordata	Craniata	Hyperoartia	Petromyzontiformes	7757	S4RJG3	2.9e-08	37.2	0.2	8.8e-08	35.6	0.2	1.9	1	IPR000210(54...158)	unreviewed	BTB domain-containing protein	605	PF00651	54..157
	Perca flavescens	Chordata	Craniata	Actinopteri	Perciformes	8167	A0A484C2Z0	3.5e-08	36.9	0.6	8.9e-08	35.6	0.6	1.7	1	IPR000210(20...126)	unreviewed	BTB domain-containing protein	295	PF00651	20..123
	Echeneis naucrates	Chordata	Craniata	Actinopteri	Carangiformes	173247	A0A665UHF6	4.4e-08	36.6	0	9e-08	35.6	0	1.5	1	IPR000210(41...147)	unreviewed	BTB domain-containing protein	530	PF00651	41..146
	Nematostella vectensis	Cnidaria		Anthozoa	Actiniaria	45351	A7RMV8	4e-08	36.7	0.3	9e-08	35.6	0.3	1.6	1	IPR000210(16...123)	unreviewed	BTB domain-containing protein	567	PF00651	16..122
	Sinocyclocheilus anshuiensis	Chordata	Craniata	Actinopteri	Cypriniformes	1608454	A0A671MUA0	4.4e-08	36.6	0	9e-08	35.6	0	1.5	1	IPR000210(58...164)	unreviewed	BTB domain-containing protein	528	PF00651	58..163
	Sinocyclocheilus anshuiensis	Chordata	Craniata	Actinopteri	Cypriniformes	1608454	A0A671MVQ7	4.5e-08	36.6	0	9e-08	35.6	0	1.5	1	IPR000210(60...166)	unreviewed	BTB domain-containing protein	530	PF00651	60..165
	Upupa epops	Chordata	Craniata	Aves	Upupiformes	57439	A0A7K6BKA1	3.4e-08	37	1.5	9e-08	35.6	0.4	2.1	1	IPR000210(34...150)	unreviewed	BTB domain-containing protein	509	PF00651	34..149
	Amphiprion ocellaris	Chordata	Craniata	Actinopteri		80972	A0A3Q1BJI0	4.5e-08	36.6	0	9.1e-08	35.6	0	1.5	1	IPR000210(41...147)	unreviewed	BTB domain-containing protein	533	PF00651	41..146
	Coregonus sp.	Chordata	Craniata	Actinopteri	Salmoniformes	861768	A0A6F9BL83	3.3e-08	37	1.1	9.1e-08	35.6	0.3	2.1	1	IPR000210(48...155)	unreviewed	BTB domain-containing protein	499	PF00651	48..154
	Cyprinus carpio	Chordata	Craniata	Actinopteri	Cypriniformes	7962	A0A8C1R565	4.4e-08	36.6	0	9.1e-08	35.6	0	1.5	1	IPR000210(35...139)	unreviewed	BTB domain-containing protein	531	PF00651	35..138
	Neolamprologus brichardi	Chordata	Craniata	Actinopteri	Cichliformes	32507	A0A3Q4HXU2	9.1e-08	35.6	0.3	9.1e-08	35.6	0.3	2.1	1	IPR000210(14...112)	unreviewed	Zinc finger and BTB domain containing 17	440	PF00651	14..107
	Pteropus vampyrus	Chordata	Craniata	Mammalia	Chiroptera	132908	A0A6P6D192	4.5e-08	36.6	0	9.1e-08	35.6	0	1.5	1	IPR000210(41...147)	unreviewed	BTB domain-containing protein	531	PF00651	41..146
	Anas platyrhynchos	Chordata	Craniata	Aves	Anseriformes	8839	A0A8B9QQV3	4.4e-08	36.6	0	9.2e-08	35.6	0	1.5	1	IPR000210(59...165)	unreviewed	BTB domain-containing protein	540	PF00651	59..164
	Orycteropus afer	Chordata	Craniata	Mammalia	Tubulidentata	1230840	A0A8B7ABH1	4.6e-08	36.5	0	9.2e-08	35.6	0	1.5	1	IPR000210(41...147)	unreviewed	BTB domain-containing protein	536	PF00651	41..146
	Eleutherodactylus coqui	Chordata	Craniata	Amphibia	Anura	57060	A0A8J6K5H9	4.2e-08	36.7	0.3	9.3e-08	35.6	0.3	1.6	1	IPR000210(53...160)	unreviewed	BTB domain-containing protein	431	PF00651	53..159
	Felis catus	Chordata	Craniata	Mammalia	Carnivora	9685	A0A337SHD2	4.6e-08	36.5	0	9.4e-08	35.6	0	1.5	1	IPR000210(55...147)	unreviewed	BTB domain-containing protein	546	PF00651	55..134
	Astyanax mexicanus	Chordata	Craniata	Actinopteri	Characiformes	7994	W5KQ50	4.6e-08	36.5	0	9.5e-08	35.5	0	1.5	1	IPR000210(50...156)	unreviewed	BTB domain-containing protein	551	PF00651	50..155
	Fundulus heteroclitus	Chordata	Craniata	Actinopteri	Cyprinodontiformes	8078	A0A3Q2Q8S9	4.6e-08	36.5	0	9.5e-08	35.5	0	1.5	1	IPR000210(41...147)	unreviewed	BTB domain-containing protein	554	PF00651	41..146
	Hucho hucho	Chordata	Craniata	Actinopteri	Salmoniformes	62062	A0A4W5QBF9	4.7e-08	36.5	0	9.5e-08	35.5	0	1.5	1	IPR000210(59...165)	unreviewed	BTB domain-containing protein	553	PF00651	59..164
	Lepidothrix coronata	Chordata	Craniata	Aves	Passeriformes	321398	A0A6J0I5D3	5.7e-08	36.2	0.3	9.5e-08	35.5	0.3	1.4	1	IPR000210(30...138)	unreviewed	BTB domain-containing protein	516	PF00651	30..125
	Mauremys mutica	Chordata	Craniata		Testudines	74926	A0A9D4ASB3	4.7e-08	36.5	0	9.5e-08	35.5	0	1.5	1	IPR000210(54...160)	unreviewed	BTB domain-containing protein	553	PF00651	54..159
	Muntiacus muntjak	Chordata	Craniata	Mammalia	Artiodactyla	9888	A0A5N3UWT3	4.2e-08	36.7	0	9.5e-08	35.5	0	1.6	1	IPR000210(57...163)	unreviewed	BTB domain-containing protein	554	PF00651	57..162
	Muntiacus reevesi	Chordata	Craniata	Mammalia	Artiodactyla	9886	A0A5N3XUQ5	4.2e-08	36.7	0	9.5e-08	35.5	0	1.6	1	IPR000210(57...163)	unreviewed	BTB domain-containing protein	554	PF00651	57..162
	Nothobranchius rachovii	Chordata	Craniata	Actinopteri	Cyprinodontiformes	451742	A0A1A8SKT7	4.3e-08	36.6	0.1	9.5e-08	35.5	0.1	1.6	1	IPR000210(2...104)	unreviewed	BTB domain-containing protein	506	PF00651	2..103
	Sus scrofa	Chordata	Craniata	Mammalia	Artiodactyla	9823	A0A8D1FSC7	4.7e-08	36.5	0	9.5e-08	35.5	0	1.5	1	IPR000210(59...165)	unreviewed	BTB domain-containing protein	551	PF00651	59..164
	Tupaia chinensis	Chordata	Craniata	Mammalia	Scandentia	246437	L9LAR2	4.2e-08	36.7	0.2	9.5e-08	35.5	0.2	1.6	1	IPR000210(40...147)	unreviewed	BTB domain-containing protein	355	PF00651	40..146
	Balaenoptera physalus	Chordata	Craniata	Mammalia	Artiodactyla	9770	A0A643BVZ8	4.3e-08	36.7	0.5	9.6e-08	35.5	0.5	1.6	1	IPR000210(25...131)	unreviewed	BTB domain-containing protein	302	PF00651	25..128
	Callorhinchus milii	Chordata	Craniata	Chondrichthyes	Chimaeriformes	7868	A0A4W3H3E8	4.6e-08	36.6	0	9.6e-08	35.5	0	1.5	1	IPR000210(16...122)	unreviewed	BTB domain-containing protein	560	PF00651	16..121
	Canis lupus	Chordata	Craniata	Mammalia	Carnivora	9615	A0A8C0LVY5	4.3e-08	36.7	0	9.6e-08	35.5	0	1.6	1	IPR000210(59...165)	unreviewed	BTB domain-containing protein	556	PF00651	59..164
	Canis lupus	Chordata	Craniata	Mammalia	Carnivora	9615	A0A8I3NJM1	4.3e-08	36.7	0	9.6e-08	35.5	0	1.6	1	IPR000210(59...165)	unreviewed	BTB domain-containing protein	556	PF00651	59..164
	Cyprinus carpio	Chordata	Craniata	Actinopteri	Cypriniformes	7962	A0A8C1LGV9	4.8e-08	36.5	0	9.6e-08	35.5	0	1.5	1	IPR000210(60...166)	unreviewed	BTB domain-containing protein	559	PF00651	60..165
	Cyprinus carpio	Chordata	Craniata	Actinopteri	Cypriniformes	7962	A0A8C1LKK3	4.7e-08	36.5	0	9.6e-08	35.5	0	1.5	1	IPR000210(58...164)	unreviewed	BTB domain-containing protein	557	PF00651	58..163
	Gasterosteus aculeatus	Chordata	Craniata	Actinopteri	Perciformes	69293	G3PQ89	4.8e-08	36.5	0	9.6e-08	35.5	0	1.5	1	IPR000210(14...120)	unreviewed	BTB domain-containing protein	557	PF00651	14..119
	Gasterosteus aculeatus	Chordata	Craniata	Actinopteri	Perciformes	69293	G3PQ92	4.9e-08	36.5	0	9.6e-08	35.5	0	1.5	1	IPR000210(2...108)	unreviewed	BTB domain-containing protein	557	PF00651	2..107
	Nothobranchius kadleci	Chordata	Craniata	Actinopteri	Cyprinodontiformes	1051664	A0A1A8CMR5	4.7e-08	36.5	0	9.6e-08	35.5	0	1.5	1	IPR000210(54...160)	unreviewed	BTB domain-containing protein	556	PF00651	54..159
	Oryzias sinensis	Chordata	Craniata	Actinopteri	Beloniformes	183150	A0A8C7Y1A9	4.7e-08	36.5	0	9.6e-08	35.5	0	1.5	1	IPR000210(53...159)	unreviewed	BTB domain-containing protein	556	PF00651	53..158
	Oryzias sinensis	Chordata	Craniata	Actinopteri	Beloniformes	183150	A0A8C7Y1B7	4.7e-08	36.5	0	9.6e-08	35.5	0	1.5	1	IPR000210(57...163)	unreviewed	BTB domain-containing protein	560	PF00651	57..162
	Sus scrofa	Chordata	Craniata	Mammalia	Artiodactyla	9823	A0A286ZUH2	4.8e-08	36.5	0	9.6e-08	35.5	0	1.5	1	IPR000210(59...165)	unreviewed	BTB domain-containing protein	557	PF00651	59..164
	Sus scrofa	Chordata	Craniata	Mammalia	Artiodactyla	9823	A0A8D0SKZ0	4.8e-08	36.5	0	9.6e-08	35.5	0	1.5	1	IPR000210(59...165)	unreviewed	BTB domain-containing protein	557	PF00651	59..164
	Ailuropoda melanoleuca	Chordata	Craniata	Mammalia	Carnivora	9646	A0A7N5K9U0	4.8e-08	36.5	0	9.7e-08	35.5	0	1.5	1	IPR000210(59...165)	unreviewed	BTB domain-containing protein	561	PF00651	59..164
	Aotus nancymaae	Chordata	Craniata	Mammalia	Primates	37293	A0A2K5F5H0	4.8e-08	36.5	0	9.7e-08	35.5	0	1.5	1	IPR000210(59...165)	unreviewed	BTB domain-containing protein	561	PF00651	59..164
	Callithrix jacchus	Chordata	Craniata	Mammalia	Primates	9483	A0A2R8MFJ6	4.8e-08	36.5	0	9.7e-08	35.5	0	1.5	1	IPR000210(59...165)	unreviewed	BTB domain-containing protein	561	PF00651	59..164
	Callorhinchus milii	Chordata	Craniata	Chondrichthyes	Chimaeriformes	7868	A0A4W3H2C5	4.5e-08	36.6	0	9.7e-08	35.5	0	1.5	1	IPR000210(59...165)	unreviewed	BTB domain-containing protein	561	PF00651	59..164
	Canis lupus	Chordata	Craniata	Mammalia	Carnivora	9615	A0A8C0LZH2	4.8e-08	36.5	0	9.7e-08	35.5	0	1.5	1	IPR000210(59...165)	unreviewed	BTB domain-containing protein	561	PF00651	59..164
	Canis lupus	Chordata	Craniata	Mammalia	Carnivora	9615	A0A8I3RWM8	4.8e-08	36.5	0	9.7e-08	35.5	0	1.5	1	IPR000210(59...165)	unreviewed	BTB domain-containing protein	561	PF00651	59..164
	Cyprinus carpio	Chordata	Craniata	Actinopteri	Cypriniformes	630221	A0A9J8CRW9	4.5e-08	36.6	0	9.7e-08	35.5	0	1.5	1	IPR000210(41...147)	unreviewed	BTB domain-containing protein	561	PF00651	41..146
	Eleutherodactylus coqui	Chordata	Craniata	Amphibia	Anura	57060	A0A8J6FAR6	4.8e-08	36.5	0	9.7e-08	35.5	0	1.5	1	IPR000210(59...165)	unreviewed	BTB domain-containing protein	561	PF00651	59..164
	Equus asinus	Chordata	Craniata	Mammalia	Perissodactyla	9793	A0A8C4MGG5	4.8e-08	36.5	0	9.7e-08	35.5	0	1.5	1	IPR000210(59...165)	unreviewed	BTB domain-containing protein	561	PF00651	59..164
	Equus caballus	Chordata	Craniata	Mammalia	Perissodactyla	9796	A0A3Q2HRX8	4.8e-08	36.5	0	9.7e-08	35.5	0	1.5	1	IPR000210(59...165)	unreviewed	BTB domain-containing protein	561	PF00651	59..164
	Equus caballus	Chordata	Craniata	Mammalia	Perissodactyla	9796	F6ZQT2	4.8e-08	36.5	0	9.7e-08	35.5	0	1.5	1	IPR000210(59...165)	unreviewed	BTB domain-containing protein	563	PF00651	59..164
	Hirundo rustica	Chordata	Craniata	Aves	Passeriformes	333673	A0A3M0KB32	4.8e-08	36.5	0	9.7e-08	35.5	0	1.5	1	IPR000210(41...147)	unreviewed	BTB domain-containing protein	564	PF00651	41..146
	Oncorhynchus tshawytscha	Chordata	Craniata	Actinopteri	Salmoniformes	74940	A0A8C8F432	4.8e-08	36.5	0	9.7e-08	35.5	0	1.5	1	IPR000210(59...165)	unreviewed	BTB domain-containing protein	561	PF00651	59..164
	Oryctolagus cuniculus	Chordata	Craniata	Mammalia	Lagomorpha	9986	A0A5F9CL36	4.7e-08	36.5	0	9.7e-08	35.5	0	1.5	1	IPR000210(59...165)	unreviewed	BTB domain-containing protein	561	PF00651	59..164
	Oryzias sinensis	Chordata	Craniata	Actinopteri	Beloniformes	183150	A0A8C8DPP0	4.8e-08	36.5	0	9.7e-08	35.5	0	1.5	1	IPR000210(20...116)	unreviewed	BTB domain-containing protein	562	PF00651	20..115
	Piliocolobus tephrosceles	Chordata	Craniata	Mammalia	Primates	591936	A0A8C9LLM5	4.8e-08	36.5	0	9.7e-08	35.5	0	1.5	1	IPR000210(59...165)	unreviewed	BTB domain-containing protein	561	PF00651	59..164
	Salarias fasciatus	Chordata	Craniata	Actinopteri	Blenniiformes	181472	A0A672G8Z1	5.6e-08	36.3	0.3	9.7e-08	35.5	0.3	1.4	1	IPR000210(65...172)	unreviewed	BTB domain-containing protein	524	PF00651	65..171
	Sapajus apella	Chordata	Craniata	Mammalia	Primates	9515	A0A6J3IZ26	4.8e-08	36.5	0	9.7e-08	35.5	0	1.5	1	IPR000210(59...165)	unreviewed	BTB domain-containing protein	561	PF00651	59..164
	Sarcophilus harrisii	Chordata	Craniata	Mammalia	Dasyuromorphia	9305	A0A7N4PUF0	4.8e-08	36.5	0	9.7e-08	35.5	0	1.5	1	IPR000210(59...165)	unreviewed	BTB domain-containing protein	561	PF00651	59..164
	Scophthalmus maximus	Chordata	Craniata	Actinopteri	Pleuronectiformes	52904	A0A8D3B3B2	4.9e-08	36.5	0	9.7e-08	35.5	0	1.5	1	IPR000210(41...147)	unreviewed	BTB domain-containing protein	565	PF00651	41..146
	Sus scrofa	Chordata	Craniata	Mammalia	Artiodactyla	9823	A0A8D0SM96	4.8e-08	36.5	0	9.7e-08	35.5	0	1.5	1	IPR000210(59...165)	unreviewed	BTB domain-containing protein	561	PF00651	59..164
	Vombatus ursinus	Chordata	Craniata	Mammalia	Diprotodontia	29139	A0A4X2K5Z9	4.8e-08	36.5	0	9.7e-08	35.5	0	1.5	1	IPR000210(59...165)	unreviewed	BTB domain-containing protein	561	PF00651	59..164
	Zosterops borbonicus	Chordata	Craniata	Aves	Passeriformes	364589	A0A8K1GWU9	4.8e-08	36.5	0	9.7e-08	35.5	0	1.5	1	IPR000210(41...147)	unreviewed	BTB domain-containing protein	564	PF00651	41..146
	Bos taurus	Chordata	Craniata	Mammalia	Artiodactyla	9913	A0AAA9RSU5	4.9e-08	36.5	0	9.8e-08	35.5	0	1.5	1	IPR000210(59...165)	unreviewed	Kelch like family member 20	568	PF00651	59..164
	Clarias magur	Chordata	Craniata	Actinopteri	Siluriformes	1594786	A0A8J4UDE1	4.9e-08	36.5	0	9.8e-08	35.5	0	1.5	1	IPR000210(45...151)	unreviewed	BTB domain-containing protein	567	PF00651	45..150
	Etheostoma spectabile	Chordata	Craniata	Actinopteri	Perciformes	54343	A0A5J5CYU9	4.8e-08	36.5	0	9.8e-08	35.5	0	1.5	1	IPR000210(59...165)	unreviewed	BTB domain-containing protein	570	PF00651	59..164
	Kryptolebias marmoratus	Chordata	Craniata	Actinopteri	Cyprinodontiformes	37003	A0A3Q3H161	4.7e-08	36.5	0	9.8e-08	35.5	0	1.5	1	IPR000210(54...160)	unreviewed	BTB domain-containing protein	566	PF00651	54..159
	Labeo rohita	Chordata	Craniata	Actinopteri	Cypriniformes	84645	A0A498MQC5	4.9e-08	36.5	0	9.8e-08	35.5	0	1.5	1	IPR000210(41...156)	unreviewed	BTB domain-containing protein	568	PF00651	41..155
	Loxia curvirostra	Chordata	Craniata	Aves	Passeriformes	64802	A0A7K7IYW1	9e-08	35.6	4.3	9.8e-08	35.5	2.1	2.1	1	IPR000210(34...153)	unreviewed	BTB domain-containing protein	607	PF00651	34..152
	Loxia leucoptera	Chordata	Craniata	Aves	Passeriformes	96539	A0A7K9GDC7	9e-08	35.6	4.3	9.8e-08	35.5	2.1	2.1	1	IPR000210(34...153)	unreviewed	BTB domain-containing protein	606	PF00651	34..152
	Mastacembelus armatus	Chordata	Craniata	Actinopteri	Synbranchiformes	205130	A0A3Q3MCI4	3.7e-08	36.8	0	9.8e-08	35.5	0	1.7	1	IPR000210(59...165)	unreviewed	BTB domain-containing protein	569	PF00651	59..164
	Nothobranchius furzeri	Chordata	Craniata	Actinopteri	Cyprinodontiformes	105023	A0A8C6PR77	3.4e-08	37	1.1	9.8e-08	35.5	0.3	2.1	1	IPR000210(31...138)	unreviewed	BTB domain-containing protein	528	PF00651	31..137
	Nothobranchius pienaari	Chordata	Craniata	Actinopteri	Cyprinodontiformes	704102	A0A1A8MR97	4.9e-08	36.5	0	9.8e-08	35.5	0	1.5	1	IPR000210(18...124)	unreviewed	BTB domain-containing protein	568	PF00651	18..123
	Pan troglodytes	Chordata	Craniata	Mammalia	Primates	9598	A0A2I3T344	4.6e-08	36.5	0	9.8e-08	35.5	0	1.5	1	IPR000210(50...156)	unreviewed	BTB domain-containing protein	570	PF00651	50..155
	Parambassis ranga	Chordata	Craniata	Actinopteri		210632	A0A6P7K2K1	4.9e-08	36.5	0	9.8e-08	35.5	0	1.5	1	IPR000210(17...123)	unreviewed	BTB domain-containing protein	567	PF00651	17..122
	Antrostomus carolinensis	Chordata	Craniata	Aves	Caprimulgiformes	279965	A0A094KUQ6	4.9e-08	36.5	0	9.9e-08	35.5	0	1.5	1	IPR000210(52...158)	unreviewed	BTB domain-containing protein	575	PF00651	52..157
	Balearica regulorum	Chordata	Craniata	Aves	Gruiformes	100784	A0A087VQM6	5e-08	36.4	0	9.9e-08	35.5	0	1.5	1	IPR000210(52...158)	unreviewed	BTB domain-containing protein	575	PF00651	52..157
	Bos taurus	Chordata	Craniata	Mammalia	Artiodactyla	9913	A0A3Q1MFR7	4.9e-08	36.5	0	9.9e-08	35.5	0	1.5	1	IPR000210(59...165)	unreviewed	BTB domain-containing protein	573	PF00651	59..164
	Collichthys lucidus	Chordata	Craniata	Actinopteri		240159	A0A4U5UZW2	5e-08	36.4	0	9.9e-08	35.5	0	1.5	1	IPR000210(54...160)	unreviewed	BTB domain-containing protein	574	PF00651	54..159
	Columba livia	Chordata	Craniata	Aves	Columbiformes	8932	A0A2I0MBU0	4.9e-08	36.4	0	9.9e-08	35.5	0	1.5	1	IPR000210(17...123)	unreviewed	BTB domain-containing protein	572	PF00651	17..122
	Cyprinus carpio	Chordata	Craniata	Actinopteri	Cypriniformes	630221	A0A8C1BUL7	3.4e-08	37	1.1	9.9e-08	35.5	0.3	2.1	1	IPR000210(31...138)	unreviewed	BTB domain-containing protein	534	PF00651	31..137
	Cyprinus carpio	Chordata	Craniata	Actinopteri	Cypriniformes	7962	A0A8C2PTC5	4.9e-08	36.5	0	9.9e-08	35.5	0	1.5	1	IPR000210(43...147)	unreviewed	BTB domain-containing protein	575	PF00651	43..146
	Geotrypetes seraphini	Chordata	Craniata	Amphibia	Gymnophiona	260995	A0A6P8P441	6.1e-08	36.1	0.3	9.9e-08	35.5	0.3	1.4	1	IPR000210(50...158)	unreviewed	BTB domain-containing protein	536	PF00651	50..145
	Macaca nemestrina	Chordata	Craniata	Mammalia	Primates	9545	A0A2K6DZB2	4.7e-08	36.5	0	9.9e-08	35.5	0	1.5	1	IPR000210(54...160)	unreviewed	BTB domain-containing protein	574	PF00651	54..159
	Paramormyrops kingsleyae	Chordata	Craniata	Actinopteri	Osteoglossiformes	1676925	A0A3B3SB81	5e-08	36.4	0	9.9e-08	35.5	0	1.5	1	IPR000210(59...165)	unreviewed	BTB domain-containing protein	572	PF00651	59..164
	Patagioenas fasciata	Chordata	Craniata	Aves	Columbiformes	372326	A0A1V4KNR9	3.5e-08	36.9	1.1	9.9e-08	35.5	0.3	2.1	1	IPR000210(30...137)	unreviewed	BTB domain-containing protein	534	PF00651	30..136
	Propithecus coquereli	Chordata	Craniata	Mammalia	Primates	379532	A0A2K6G047	4.9e-08	36.5	0	9.9e-08	35.5	0	1.5	1	IPR000210(59...165)	unreviewed	BTB domain-containing protein	571	PF00651	59..164
	Sparus aurata	Chordata	Craniata	Actinopteri	Spariformes	8175	A0A671WHY2	4.8e-08	36.5	0	9.9e-08	35.5	0	1.5	1	IPR000210(62...168)	unreviewed	BTB domain-containing protein	572	PF00651	62..167
	Acipenser ruthenus	Chordata	Craniata	Actinopteri	Acipenseriformes	7906	A0A444U9L1	5.1e-08	36.4	0	1e-07	35.5	0	1.5	1	IPR000210(50...156)	unreviewed	BTB domain-containing protein	583	PF00651	50..155
	Acipenser ruthenus	Chordata	Craniata	Actinopteri	Acipenseriformes	7906	A0A444UD20	5.1e-08	36.4	0	1e-07	35.4	0	1.5	1	IPR000210(41...147)	unreviewed	BTB domain-containing protein	591	PF00651	41..146
	Acropora cervicornis	Cnidaria		Anthozoa	Scleractinia	6130	A0AAD9Q397	6e-08	36.2	0.9	1e-07	35.5	0.2	1.8	1	IPR000210(24...131)	unreviewed	Kelch-like protein 28	570	PF00651	24..130
	Ailuropoda melanoleuca	Chordata	Craniata	Mammalia	Carnivora	9646	D2H5I0	5.2e-08	36.4	0	1e-07	35.4	0	1.5	1	IPR000210(52...158)	unreviewed	BTB domain-containing protein	602	PF00651	52..157
	Alligator sinensis	Chordata	Craniata		Crocodylia	38654	A0A3Q0G2B7	5.1e-08	36.4	0	1e-07	35.4	0	1.5	1	IPR000210(41...147)	unreviewed	BTB domain-containing protein	591	PF00651	41..146
	Amphilophus citrinellus	Chordata	Craniata	Actinopteri	Cichliformes	61819	A0A3Q0SXR5	5e-08	36.4	0	1e-07	35.4	0	1.5	1	IPR000210(54...160)	unreviewed	BTB domain-containing protein	591	PF00651	54..159
	Anas platyrhynchos	Chordata	Craniata	Aves	Anseriformes	8839	A0A8B9QTH7	4.9e-08	36.5	0	1e-07	35.5	0	1.5	1	IPR000210(59...165)	unreviewed	BTB domain-containing protein	576	PF00651	59..164
	Anser brachyrhynchus	Chordata	Craniata	Aves	Anseriformes	132585	A0A8B9D199	5.1e-08	36.4	0	1e-07	35.4	0	1.5	1	IPR000210(41...147)	unreviewed	BTB domain-containing protein	600	PF00651	41..146
	Aptenodytes forsteri	Chordata	Craniata	Aves	Sphenisciformes	9233	A0A087QVK7	5.2e-08	36.4	0	1e-07	35.4	0	1.5	1	IPR000210(52...158)	unreviewed	BTB domain-containing protein	602	PF00651	52..157
	Astatotilapia calliptera	Chordata	Craniata	Actinopteri	Cichliformes	8154	A0A3P8Q4Z5	1e-07	35.4	0.2	1e-07	35.4	0.2	2	1	IPR000210(15...113)	unreviewed	Zinc finger and BTB domain containing 17	379	PF00651	15..108
	Astyanax mexicanus	Chordata	Craniata	Actinopteri	Characiformes	7994	A0A3B1JRG3	5.1e-08	36.4	0	1e-07	35.4	0	1.5	1	IPR000210(41...147)	unreviewed	BTB domain-containing protein	591	PF00651	41..146
	Astyanax mexicanus	Chordata	Craniata	Actinopteri	Characiformes	7994	A0A8B9RPL0	5.1e-08	36.4	0	1e-07	35.4	0	1.5	1	IPR000210(41...147)	unreviewed	BTB domain-containing protein	591	PF00651	41..146
	Balaenoptera musculus	Chordata	Craniata	Mammalia	Artiodactyla	9771	A0A8B8V3B0	5.1e-08	36.4	0	1e-07	35.4	0	1.5	1	IPR000210(41...147)	unreviewed	BTB domain-containing protein	591	PF00651	41..146
	Bambusicola thoracicus	Chordata	Craniata	Aves	Galliformes	9083	A0A2P4TFA0	5.1e-08	36.4	0	1e-07	35.4	0	1.5	1	IPR000210(41...147)	unreviewed	BTB domain-containing protein	591	PF00651	41..146
	Bison bison	Chordata	Craniata	Mammalia	Artiodactyla	43346	A0A6P3I9D3	5.1e-08	36.4	0	1e-07	35.4	0	1.5	1	IPR000210(41...147)	unreviewed	BTB domain-containing protein	591	PF00651	41..146
	Bos indicus	Chordata	Craniata	Mammalia	Artiodactyla	9915	A0A6P5D1A9	5.1e-08	36.4	0	1e-07	35.4	0	1.5	1	IPR000210(41...147)	unreviewed	BTB domain-containing protein	591	PF00651	41..146
	Bos mutus	Chordata	Craniata	Mammalia	Artiodactyla	72004	A0A6B0RCF6	5.1e-08	36.4	0	1e-07	35.4	0	1.5	1	IPR000210(41...147)	unreviewed	BTB domain-containing protein	591	PF00651	41..146
	Bos mutus	Chordata	Craniata	Mammalia	Artiodactyla	30521	A0A8B9YH24	5e-08	36.4	0	1e-07	35.4	0	1.5	1	IPR000210(80...186)	unreviewed	BTB domain-containing protein	594	PF00651	80..185
	Bos mutus	Chordata	Craniata	Mammalia	Artiodactyla	72004	L8ITM7	5.2e-08	36.4	0	1e-07	35.4	0	1.5	1	IPR000210(52...158)	unreviewed	BTB domain-containing protein	602	PF00651	52..157
	Bos taurus	Chordata	Craniata	Mammalia	Artiodactyla	9913	A0A3Q1MPP7	5.2e-08	36.4	0	1e-07	35.4	0	1.5	1	IPR000210(52...158)	unreviewed	BTB domain-containing protein	602	PF00651	52..157
	Callipepla squamata	Chordata	Craniata	Aves	Galliformes	9009	A0A226N1T4	4.8e-08	36.5	0	1e-07	35.4	0	1.5	1	IPR000210(69...175)	unreviewed	BTB domain-containing protein	592	PF00651	69..174
	Calypte anna	Chordata	Craniata	Aves	Apodiformes	9244	A0A091IAA0	5.2e-08	36.4	0	1e-07	35.4	0	1.5	1	IPR000210(52...158)	unreviewed	BTB domain-containing protein	599	PF00651	52..157
	Canis lupus	Chordata	Craniata	Mammalia	Carnivora	286419	A0A8C0KXZ5	5.1e-08	36.4	0	1e-07	35.4	0	1.5	1	IPR000210(41...147)	unreviewed	BTB domain-containing protein	591	PF00651	41..146
	Canis lupus	Chordata	Craniata	Mammalia	Carnivora	9615	A0A8C0LW03	5.1e-08	36.4	0	1e-07	35.4	0	1.5	1	IPR000210(41...147)	unreviewed	BTB domain-containing protein	591	PF00651	41..146
	Carassius auratus	Chordata	Craniata	Actinopteri	Cypriniformes	7957	A0A6P6IUE0	5.1e-08	36.4	0	1e-07	35.4	0	1.5	1	IPR000210(43...147)	unreviewed	BTB domain-containing protein	591	PF00651	43..146
	Carassius auratus	Chordata	Craniata	Actinopteri	Cypriniformes	7957	A0A9E7VC95	5e-08	36.4	0	1e-07	35.5	0	1.5	1	IPR000210(43...147)	unreviewed	BTB domain-containing protein	580	PF00651	43..146
	Carassius gibelio	Chordata	Craniata	Actinopteri	Cypriniformes	101364	A0A9E8DEL6	5e-08	36.4	0	1e-07	35.5	0	1.5	1	IPR000210(43...147)	unreviewed	BTB domain-containing protein	580	PF00651	43..146
	Cariama cristata	Chordata	Craniata	Aves	Cariamiformes	54380	A0A091MJG9	5.2e-08	36.4	0	1e-07	35.4	0	1.5	1	IPR000210(52...158)	unreviewed	BTB domain-containing protein	601	PF00651	52..157
	Castor canadensis	Chordata	Craniata	Mammalia	Rodentia	51338	A0A8C0X388	5.2e-08	36.4	0	1e-07	35.4	0	1.5	1	IPR000210(51...157)	unreviewed	BTB domain-containing protein	601	PF00651	51..156
	Certhia brachydactyla	Chordata	Craniata	Aves	Passeriformes	73330	A0A7L1W723	5.2e-08	36.4	0	1e-07	35.4	0	1.5	1	IPR000210(52...158)	unreviewed	BTB domain-containing protein	602	PF00651	52..157
	Cervus elaphus	Chordata	Craniata	Mammalia	Artiodactyla	46360	A0A212C713	4.2e-08	36.7	0.5	1e-07	35.5	0.5	1.7	1	IPR000210(25...131)	unreviewed	BTB domain-containing protein	316	PF00651	25..128
	Charadrius vociferus	Chordata	Craniata	Aves	Charadriiformes	50402	A0A0A0B092	5.2e-08	36.4	0	1e-07	35.4	0	1.5	1	IPR000210(52...158)	unreviewed	BTB domain-containing protein	602	PF00651	52..157
	Chrysolophus pictus	Chordata	Craniata	Aves	Galliformes	9089	A0A8C3L5U0	5.2e-08	36.4	0	1e-07	35.4	0	1.5	1	IPR000210(53...159)	unreviewed	BTB domain-containing protein	596	PF00651	53..158
	Cirrhinus molitorella	Chordata	Craniata	Actinopteri	Cypriniformes	172907	A0AA88TZL4	5.1e-08	36.4	0	1e-07	35.4	0	1.5	1	IPR000210(41...147)	unreviewed	BTB domain-containing protein	591	PF00651	41..146
	Clupea harengus	Chordata	Craniata	Actinopteri	Clupeiformes	7950	A0A6P3VUX4	5.1e-08	36.4	0	1e-07	35.4	0	1.5	1	IPR000210(41...147)	unreviewed	BTB domain-containing protein	591	PF00651	41..146
	Collichthys lucidus	Chordata	Craniata	Actinopteri		240159	A0A4U5UZX0	5.1e-08	36.4	0	1e-07	35.5	0	1.5	1	IPR000210(54...160)	unreviewed	BTB domain-containing protein	585	PF00651	54..159
	Corvus brachyrhynchos	Chordata	Craniata	Aves	Passeriformes	85066	A0A091EEN4	5.2e-08	36.4	0	1e-07	35.4	0	1.5	1	IPR000210(52...158)	unreviewed	BTB domain-containing protein	602	PF00651	52..157
	Corvus moneduloides	Chordata	Craniata	Aves	Passeriformes	1196302	A0A8C3EFX7	5e-08	36.4	0	1e-07	35.4	0	1.5	1	IPR000210(58...164)	unreviewed	Uncharacterized protein	591	PF00651	58..163
	Cuculus canorus	Chordata	Craniata	Aves	Cuculiformes	55661	A0A091G1W7	5.2e-08	36.4	0	1e-07	35.4	0	1.5	1	IPR000210(52...158)	unreviewed	BTB domain-containing protein	602	PF00651	52..157
	Cyanistes caeruleus	Chordata	Craniata	Aves	Passeriformes	156563	A0A8C0VKM0	5e-08	36.4	0	1e-07	35.5	0	1.5	1	IPR000210(58...164)	unreviewed	BTB domain-containing protein	583	PF00651	58..163
	Cyanoderma ruficeps	Chordata	Craniata	Aves	Passeriformes	181631	A0A8C3R856	4.1e-08	36.7	1.1	1e-07	35.4	0.3	2	1	IPR000210(1...108)	unreviewed	BTB domain-containing protein	561	PF00651	1..107
	Cyanoderma ruficeps	Chordata	Craniata	Aves	Passeriformes	181631	A0A8C3RAB0	3.9e-08	36.8	1.1	1e-07	35.4	0.3	2.1	1	IPR000210(1...108)	unreviewed	BTB domain-containing protein	561	PF00651	1..107
	Cyclopterus lumpus	Chordata	Craniata	Actinopteri	Perciformes	8103	A0A8C2X7P7	3.7e-08	36.8	1.1	1e-07	35.4	0.3	2.1	1	IPR000210(31...138)	unreviewed	BTB domain-containing protein	554	PF00651	31..137
	Cyprinus carpio	Chordata	Craniata	Actinopteri	Cypriniformes	7962	A0A8C1TQK3	5.2e-08	36.4	0	1e-07	35.4	0	1.5	1	IPR000210(52...158)	unreviewed	BTB domain-containing protein	602	PF00651	52..157
	Cyprinus carpio	Chordata	Craniata	Actinopteri	Cypriniformes	7962	A0A8C1TS17	5.2e-08	36.4	0	1e-07	35.4	0	1.5	1	IPR000210(52...158)	unreviewed	BTB domain-containing protein	602	PF00651	52..157
	Cyprinus carpio	Chordata	Craniata	Actinopteri	Cypriniformes	7962	A0A8C1ZET5	5.1e-08	36.4	0	1e-07	35.4	0	1.5	1	IPR000210(43...147)	unreviewed	BTB domain-containing protein	591	PF00651	43..146
	Cyprinus carpio	Chordata	Craniata	Actinopteri	Cypriniformes	7962	A0A8C2PT74	5e-08	36.4	0	1e-07	35.4	0	1.5	1	IPR000210(57...161)	unreviewed	BTB domain-containing protein	589	PF00651	57..160
	Cyprinus carpio	Chordata	Craniata	Actinopteri	Cypriniformes	630221	A0A9J7Z455	5.1e-08	36.4	0	1e-07	35.4	0	1.5	1	IPR000210(43...147)	unreviewed	BTB domain-containing protein	591	PF00651	43..146
	Cyprinus carpio	Chordata	Craniata	Actinopteri	Cypriniformes	630221	A0A9J8AMK5	5.1e-08	36.4	0	1e-07	35.5	0	1.5	1	IPR000210(83...189)	unreviewed	BTB domain-containing protein	582	PF00651	83..188
	Cyprinus carpio	Chordata	Craniata	Actinopteri	Cypriniformes	7962	A0A9Q9Z4D0	5.1e-08	36.4	0	1e-07	35.4	0	1.5	1	IPR000210(43...147)	unreviewed	BTB domain-containing protein	592	PF00651	43..146
	Danio rerio	Chordata	Craniata	Actinopteri	Cypriniformes	7955	E9QC58	5.1e-08	36.4	0	1e-07	35.4	0	1.5	1	IPR000210(41...147)	unreviewed	BTB domain-containing protein	591	PF00651	41..146
	Delphinapterus leucas	Chordata	Craniata	Mammalia	Artiodactyla	9749	A0A2Y9MGB6	5.1e-08	36.4	0	1e-07	35.4	0	1.5	1	IPR000210(41...147)	unreviewed	BTB domain-containing protein	591	PF00651	41..146
	Dicaeum eximium	Chordata	Craniata	Aves	Passeriformes	667154	A0A7K9KEG9	5.2e-08	36.4	0	1e-07	35.4	0	1.5	1	IPR000210(52...158)	unreviewed	BTB domain-containing protein	602	PF00651	52..157
	Dicentrarchus labrax	Chordata	Craniata	Actinopteri		13489	A0A8C4E0N1	5.1e-08	36.4	0	1e-07	35.4	0	1.5	1	IPR000210(60...166)	unreviewed	BTB domain-containing protein	591	PF00651	60..165
	Dicentrarchus labrax	Chordata	Craniata	Actinopteri		13489	A0A8P4GKL4	5e-08	36.4	0	1e-07	35.5	0	1.5	1	IPR000210(17...123)	unreviewed	BTB domain-containing protein	579	PF00651	17..122
	Dissostichus eleginoides	Chordata	Craniata	Actinopteri	Perciformes	100907	A0AAD9B7P7	5.2e-08	36.4	0	1e-07	35.4	0	1.5	1	IPR000210(59...148)	unreviewed	Kelch-like protein 20	592	PF00651	59..135
	Dromaius novaehollandiae	Chordata	Craniata	Aves	Casuariiformes	8790	A0A8C4KI20	5e-08	36.4	0	1e-07	35.5	0	1.5	1	IPR000210(59...165)	unreviewed	BTB domain-containing protein	582	PF00651	59..164
	Dromaius novaehollandiae	Chordata	Craniata	Aves	Casuariiformes	8790	A0A8C4PCG2	5.1e-08	36.4	0	1e-07	35.4	0	1.5	1	IPR000210(41...147)	unreviewed	BTB domain-containing protein	591	PF00651	41..146
	Dryobates pubescens	Chordata	Craniata	Aves	Piciformes	118200	A0A093GN74	5.2e-08	36.4	0	1e-07	35.4	0	1.5	1	IPR000210(52...158)	unreviewed	BTB domain-containing protein	602	PF00651	52..157
	Echeneis naucrates	Chordata	Craniata	Actinopteri	Carangiformes	173247	A0A665UHJ9	5e-08	36.4	0	1e-07	35.4	0	1.5	1	IPR000210(54...160)	unreviewed	BTB domain-containing protein	597	PF00651	54..159
	Egretta garzetta	Chordata	Craniata	Aves	Pelecaniformes	188379	A0A091KC14	5.2e-08	36.4	0	1e-07	35.4	0	1.5	1	IPR000210(52...158)	unreviewed	BTB domain-containing protein	601	PF00651	52..157
	Elachura formosa	Chordata	Craniata	Aves	Passeriformes	1463973	A0A851UU91	3.3e-08	37	2.3	1e-07	35.4	0.8	2.3	1	IPR000210(33...143)	unreviewed	BTB domain-containing protein	302	PF00651	33..142
	Electrophorus electricus	Chordata	Craniata	Actinopteri	Gymnotiformes	8005	A0A4W4FCB1	5.2e-08	36.4	0	1e-07	35.4	0	1.5	1	IPR000210(54...160)	unreviewed	BTB domain-containing protein	602	PF00651	54..159
	Electrophorus electricus	Chordata	Craniata	Actinopteri	Gymnotiformes	8005	A0A4W4FDV8	5.1e-08	36.4	0	1e-07	35.4	0	1.5	1	IPR000210(41...147)	unreviewed	BTB domain-containing protein	591	PF00651	41..146
	Electrophorus electricus	Chordata	Craniata	Actinopteri	Gymnotiformes	8005	A0A4W4FE07	5.2e-08	36.4	0	1e-07	35.4	0	1.5	1	IPR000210(54...160)	unreviewed	BTB domain-containing protein	602	PF00651	54..159
	Equus asinus	Chordata	Craniata	Mammalia	Perissodactyla	9793	A0A9L0JM51	5.2e-08	36.4	0	1e-07	35.4	0	1.5	1	IPR000210(52...158)	unreviewed	BTB domain-containing protein	602	PF00651	52..157
	Erythrocercus mccallii	Chordata	Craniata	Aves	Passeriformes	107208	A0A7K5PXL0	5.1e-08	36.4	0	1e-07	35.5	0	1.5	1	IPR000210(52...158)	unreviewed	BTB domain-containing protein	585	PF00651	52..157
	Fukomys damarensis	Chordata	Craniata	Mammalia	Rodentia	885580	A0A091D8N2	5.1e-08	36.4	0	1e-07	35.4	0	1.5	1	IPR000210(41...147)	unreviewed	BTB domain-containing protein	591	PF00651	41..146
	Fulmarus glacialis	Chordata	Craniata	Aves	Procellariiformes	30455	A0A093JL61	5.2e-08	36.4	0	1e-07	35.4	0	1.5	1	IPR000210(52...158)	unreviewed	BTB domain-containing protein	602	PF00651	52..157
	Galemys pyrenaicus	Chordata	Craniata	Mammalia	Eulipotyphla	202257	A0A8J6ABK9	5.1e-08	36.4	0	1e-07	35.4	0	1.5	1	IPR000210(41...147)	unreviewed	BTB domain-containing protein	590	PF00651	41..146
	Gallus gallus	Chordata	Craniata	Aves	Galliformes	9031	A0A8V0Y7S6	5.1e-08	36.4	0	1e-07	35.4	0	1.5	1	IPR000210(41...147)	unreviewed	BTB domain-containing protein	591	PF00651	41..146
	Gambusia affinis	Chordata	Craniata	Actinopteri	Cyprinodontiformes	33528	A0A315VS05	5.1e-08	36.4	0	1e-07	35.4	0	1.5	1	IPR000210(41...147)	unreviewed	BTB domain-containing protein	591	PF00651	41..146
	Gopherus agassizii	Chordata	Craniata		Testudines	38772	A0A452IAU6	5.1e-08	36.4	0	1e-07	35.4	0	1.5	1	IPR000210(55...161)	unreviewed	BTB domain-containing protein	588	PF00651	55..160
	Gouania willdenowi	Chordata	Craniata	Actinopteri	Blenniiformes	441366	A0A8C5I472	5.2e-08	36.4	0	1e-07	35.4	0	1.5	1	IPR000210(50...156)	unreviewed	BTB domain-containing protein	600	PF00651	50..155
	Haliaeetus albicilla	Chordata	Craniata	Aves	Accipitriformes	8969	A0A091QS61	5.2e-08	36.4	0	1e-07	35.4	0	1.5	1	IPR000210(52...158)	unreviewed	BTB domain-containing protein	601	PF00651	52..157
	Hemibagrus guttatus	Chordata	Craniata	Actinopteri	Siluriformes	175788	A0AAE0R992	5e-08	36.4	0	1e-07	35.5	0	1.5	1	IPR000210(41...147)	unreviewed	Uncharacterized protein	577	PF00651	41..146
	Hipposideros armiger	Chordata	Craniata	Mammalia	Chiroptera	186990	A0A8B7RRK0	5.1e-08	36.4	0	1e-07	35.4	0	1.5	1	IPR000210(41...147)	unreviewed	BTB domain-containing protein	591	PF00651	41..146
	Hymenochirus boettgeri	Chordata	Craniata	Amphibia	Anura	247094	A0A8T2J2U2	5.2e-08	36.4	0	1e-07	35.4	0	1.5	1	IPR000210(59...165)	unreviewed	BTB domain-containing protein	602	PF00651	59..164
	Ictalurus punctatus	Chordata	Craniata	Actinopteri	Siluriformes	7998	A0A2D0RAV1	5.1e-08	36.4	0	1e-07	35.4	0	1.5	1	IPR000210(41...147)	unreviewed	BTB domain-containing protein	591	PF00651	41..146
	Jaculus jaculus	Chordata	Craniata	Mammalia	Rodentia	51337	A0A8C5LGH3	5e-08	36.4	0	1e-07	35.5	0	1.5	1	IPR000210(52...158)	unreviewed	BTB domain-containing protein	578	PF00651	52..157
	Labrus bergylta	Chordata	Craniata	Actinopteri	Labriformes	56723	A0A3Q3MXT0	5e-08	36.4	0	1e-07	35.4	0	1.5	1	IPR000210(59...165)	unreviewed	BTB domain-containing protein	588	PF00651	59..164
	Lamprotornis superbus	Chordata	Craniata	Aves	Passeriformes	245042	A0A835NY84	2.8e-08	37.3	0.3	1e-07	35.5	0.5	1.9	1	IPR000210(27...133)	unreviewed	BTB domain-containing protein	312	PF00651	27..130
	Lates calcarifer	Chordata	Craniata	Actinopteri		8187	A0A4W6CXS4	5.2e-08	36.4	0	1e-07	35.4	0	1.5	1	IPR000210(54...160)	unreviewed	BTB domain-containing protein	598	PF00651	54..159
	Leptosomus discolor	Chordata	Craniata	Aves	Coraciiformes	188344	A0A091PZM2	5.1e-08	36.4	0	1e-07	35.4	0	1.5	1	IPR000210(52...158)	unreviewed	BTB domain-containing protein	593	PF00651	52..157
	Macaca fascicularis	Chordata	Craniata	Mammalia	Primates	9541	I7G3J2	5.2e-08	36.4	0	1e-07	35.4	0	1.5	1	IPR000210(59...165)	unreviewed	BTB domain-containing protein	599	PF00651	59..164
	Macaca nemestrina	Chordata	Craniata	Mammalia	Primates	9545	A0A2K6DZD2	5.1e-08	36.4	0	1e-07	35.4	0	1.5	1	IPR000210(41...147)	unreviewed	BTB domain-containing protein	591	PF00651	41..146
	Manacus vitellinus	Chordata	Craniata	Aves	Passeriformes	328815	A0A093S006	5.2e-08	36.4	0	1e-07	35.4	0	1.5	1	IPR000210(52...158)	unreviewed	BTB domain-containing protein	602	PF00651	52..157
	Merluccius polli	Chordata	Craniata	Actinopteri	Gadiformes	89951	A0AA47M5X7	5.1e-08	36.4	0	1e-07	35.4	0	1.5	1	IPR000210(41...147)	unreviewed	BTB domain-containing protein	591	PF00651	41..146
	Microcaecilia unicolor	Chordata	Craniata	Amphibia	Gymnophiona	1415580	A0A6P7YDS9	5.2e-08	36.4	0	1e-07	35.4	0	1.5	1	IPR000210(48...154)	unreviewed	BTB domain-containing protein	598	PF00651	48..153
	Microcebus murinus	Chordata	Craniata	Mammalia	Primates	30608	A0A8B7GD27	5.1e-08	36.4	0	1e-07	35.4	0	1.5	1	IPR000210(41...147)	unreviewed	BTB domain-containing protein	591	PF00651	41..146
	Mola mola	Chordata	Craniata	Actinopteri	Tetraodontiformes	94237	A0A3Q3X9D1	4.9e-08	36.5	0	1e-07	35.5	0	1.5	1	IPR000210(59...165)	unreviewed	BTB domain-containing protein	580	PF00651	59..164
	Monodelphis domestica	Chordata	Craniata	Mammalia	Didelphimorphia	13616	A0A5F8GTZ2	4.5e-08	36.6	0	1e-07	35.5	0	1.6	1	IPR000210(83...189)	unreviewed	BTB domain-containing protein	580	PF00651	83..188
	Monopterus albus	Chordata	Craniata	Actinopteri	Synbranchiformes	43700	A0A3Q3JWP5	4.5e-08	36.6	0	1e-07	35.4	0	1.6	1	IPR000210(54...160)	unreviewed	BTB domain-containing protein	593	PF00651	54..159
	Mustela putorius	Chordata	Craniata	Mammalia	Carnivora	9669	A0A8U0RK48	5.1e-08	36.4	0	1e-07	35.4	0	1.5	1	IPR000210(41...147)	unreviewed	BTB domain-containing protein	591	PF00651	41..146
	Myripristis murdjan	Chordata	Craniata	Actinopteri	Holocentriformes	586833	A0A667XR81	5.2e-08	36.4	0	1e-07	35.4	0	1.5	1	IPR000210(52...158)	unreviewed	BTB domain-containing protein	601	PF00651	52..157
	Myripristis murdjan	Chordata	Craniata	Actinopteri	Holocentriformes	586833	A0A667XZ75	5.1e-08	36.4	0	1e-07	35.4	0	1.5	1	IPR000210(41...147)	unreviewed	BTB domain-containing protein	590	PF00651	41..146
	Nannospalax galili	Chordata	Craniata	Mammalia	Rodentia	1026970	A0A8C6W7Y6	5.2e-08	36.4	0	1e-07	35.4	0	1.5	1	IPR000210(51...157)	unreviewed	BTB domain-containing protein	601	PF00651	51..156
	Neogobius melanostomus	Chordata	Craniata	Actinopteri	Gobiiformes	47308	A0A8C6TT09	5e-08	36.4	0	1e-07	35.5	0	1.5	1	IPR000210(35...141)	unreviewed	BTB domain-containing protein	579	PF00651	35..140
	Neogobius melanostomus	Chordata	Craniata	Actinopteri	Gobiiformes	47308	A0A8C6TYG9	5e-08	36.4	0	1e-07	35.5	0	1.5	1	IPR000210(38...144)	unreviewed	BTB domain-containing protein	582	PF00651	38..143
	Nestor notabilis	Chordata	Craniata	Aves	Psittaciformes	176057	A0A091T820	5.2e-08	36.4	0	1e-07	35.4	0	1.5	1	IPR000210(52...158)	unreviewed	BTB domain-containing protein	597	PF00651	52..157
	Nipponia nippon	Chordata	Craniata	Aves	Pelecaniformes	128390	A0A091UVH5	5.2e-08	36.4	0	1e-07	35.4	0	1.5	1	IPR000210(52...158)	unreviewed	BTB domain-containing protein	600	PF00651	52..157
	Nomascus leucogenys	Chordata	Craniata	Mammalia	Primates	61853	G1RZ92	5.1e-08	36.4	0	1e-07	35.4	0	1.5	1	IPR000210(53...146)	unreviewed	BTB domain-containing protein	590	PF00651	53..145
	Nothobranchius furzeri	Chordata	Craniata	Actinopteri	Cyprinodontiformes	105023	A0A9D2YL43	5.1e-08	36.4	0	1e-07	35.4	0	1.5	1	IPR000210(41...147)	unreviewed	BTB domain-containing protein	591	PF00651	41..146
	Nothoprocta perdicaria	Chordata	Craniata	Aves	Tinamiformes	30464	A0A8C6YJ62	3e-08	37.1	0.2	1e-07	35.4	0.2	2	1	IPR000210(40...147)	unreviewed	BTB domain-containing protein	313	PF00651	40..146
	Nyctereutes procyonoides	Chordata	Craniata	Mammalia	Carnivora	34880	A0A811Y7W4	5.1e-08	36.4	0	1e-07	35.4	0	1.5	1	IPR000210(41...147)	unreviewed	BTB domain-containing protein	591	PF00651	41..146
	Odocoileus virginianus	Chordata	Craniata	Mammalia	Artiodactyla	9880	A0A6J0Y8H7	5.1e-08	36.4	0	1e-07	35.4	0	1.5	1	IPR000210(41...147)	unreviewed	BTB domain-containing protein	591	PF00651	41..146
	Oncorhynchus kisutch	Chordata	Craniata	Actinopteri	Salmoniformes	8019	A0A8C7MS28	5.3e-08	36.4	0	1e-07	35.4	0	1.5	1	IPR000210(52...158)	unreviewed	BTB domain-containing protein	602	PF00651	52..157
	Oncorhynchus mykiss	Chordata	Craniata	Actinopteri	Salmoniformes	8022	A0A060WM49	5.2e-08	36.4	0	1e-07	35.4	0	1.5	1	IPR000210(41...147)	unreviewed	BTB domain-containing protein	591	PF00651	41..146
	Oncorhynchus mykiss	Chordata	Craniata	Actinopteri	Salmoniformes	8022	A0A8C7P1M3	5.3e-08	36.4	0	1e-07	35.4	0	1.5	1	IPR000210(55...161)	unreviewed	BTB domain-containing protein	598	PF00651	55..160
	Onychostoma macrolepis	Chordata	Craniata	Actinopteri	Cypriniformes	369639	A0A7J6BNX9	4e-08	36.8	1.1	1e-07	35.4	0.3	2.1	1	IPR000210(31...138)	unreviewed	BTB domain-containing protein	561	PF00651	31..137
	Ophiophagus hannah	Chordata	Craniata	Lepidosauria	Squamata	8665	V8NVL4	5.2e-08	36.4	0	1e-07	35.4	0	1.5	1	IPR000210(59...165)	unreviewed	BTB domain-containing protein	602	PF00651	59..164
	Paramormyrops kingsleyae	Chordata	Craniata	Actinopteri	Osteoglossiformes	1676925	A0A3B3SC38	5e-08	36.4	0	1e-07	35.5	0	1.5	1	IPR000210(59...165)	unreviewed	BTB domain-containing protein	583	PF00651	59..164
	Pelecanus crispus	Chordata	Craniata	Aves	Pelecaniformes	36300	A0A091SR98	5.2e-08	36.4	0	1e-07	35.4	0	1.5	1	IPR000210(52...158)	unreviewed	BTB domain-containing protein	595	PF00651	52..157
	Phaethon lepturus	Chordata	Craniata	Aves	Phaethontiformes	97097	A0A091T9Y0	5.2e-08	36.4	0	1e-07	35.4	0	1.5	1	IPR000210(52...158)	unreviewed	BTB domain-containing protein	602	PF00651	52..157
	Phocoena sinus	Chordata	Craniata	Mammalia	Artiodactyla	42100	A0A8C9E6S7	5.1e-08	36.4	0	1e-07	35.4	0	1.5	1	IPR000210(41...147)	unreviewed	BTB domain-containing protein	591	PF00651	41..146
	Phyllostomus discolor	Chordata	Craniata	Mammalia	Chiroptera	89673	A0A833YI55	5.1e-08	36.4	0	1e-07	35.4	0	1.5	1	IPR000210(41...147)	unreviewed	BTB domain-containing protein	591	PF00651	41..146
	Pocillopora damicornis	Cnidaria		Anthozoa	Scleractinia	46731	A0A3M6U4W9	5.6e-08	36.3	0.3	1e-07	35.4	0.3	1.4	1	IPR000210(40...132)	unreviewed	BTB domain-containing protein	132	PF00651	40..131
	Poecilia latipinna	Chordata	Craniata	Actinopteri	Cyprinodontiformes	48699	A0A3B3TL38	4.9e-08	36.5	0	1e-07	35.5	0	1.5	1	IPR000210(59...165)	unreviewed	BTB domain-containing protein	584	PF00651	59..164
	Prolemur simus	Chordata	Craniata	Mammalia	Primates	1328070	A0A8C9DK28	4.9e-08	36.5	0	1e-07	35.5	0	1.5	1	IPR000210(54...160)	unreviewed	BTB domain-containing protein	577	PF00651	54..159
	Pterocles gutturalis	Chordata	Craniata	Aves	Ciconiiformes	240206	A0A093EIY9	5.2e-08	36.4	0	1e-07	35.4	0	1.5	1	IPR000210(52...158)	unreviewed	BTB domain-containing protein	602	PF00651	52..157
	Pygocentrus nattereri	Chordata	Craniata	Actinopteri	Characiformes	42514	A0A3B4BVZ4	5.1e-08	36.4	0	1e-07	35.4	0	1.5	1	IPR000210(41...147)	unreviewed	BTB domain-containing protein	591	PF00651	41..146
	Pygoscelis adeliae	Chordata	Craniata	Aves	Sphenisciformes	9238	A0A093NIZ9	5.2e-08	36.4	0	1e-07	35.4	0	1.5	1	IPR000210(52...158)	unreviewed	BTB domain-containing protein	597	PF00651	52..157
	Regulus satrapa	Chordata	Craniata	Aves	Passeriformes	13245	A0A7K4XUL2	5.1e-08	36.4	0	1e-07	35.4	0	1.5	1	IPR000210(52...158)	unreviewed	BTB domain-containing protein	596	PF00651	52..157
	Salarias fasciatus	Chordata	Craniata	Actinopteri	Blenniiformes	181472	A0A672GUS6	2.3e-08	37.5	4.1	1e-07	35.4	0.3	3	1	IPR000210(18...121)	unreviewed	BTB domain-containing protein	553	PF00651	18..120
	Salmo trutta	Chordata	Craniata	Actinopteri	Salmoniformes	8032	A0A673Z472	5.2e-08	36.4	0	1e-07	35.4	0	1.5	1	IPR000210(50...156)	unreviewed	BTB domain-containing protein	600	PF00651	50..155
	Salvelinus namaycush	Chordata	Craniata	Actinopteri	Salmoniformes	8040	A0A8U0P770	5.3e-08	36.4	0	1e-07	35.4	0	1.5	1	IPR000210(52...158)	unreviewed	BTB domain-containing protein	602	PF00651	52..157
	Scophthalmus maximus	Chordata	Craniata	Actinopteri	Pleuronectiformes	52904	A0A8D3C0X0	5.2e-08	36.4	0	1e-07	35.4	0	1.5	1	IPR000210(41...147)	unreviewed	BTB domain-containing protein	591	PF00651	41..146
	Scophthalmus maximus	Chordata	Craniata	Actinopteri	Pleuronectiformes	52904	A0A8D3CAS9	5.3e-08	36.4	0	1e-07	35.4	0	1.5	1	IPR000210(51...157)	unreviewed	BTB domain-containing protein	601	PF00651	51..156
	Scophthalmus maximus	Chordata	Craniata	Actinopteri	Pleuronectiformes	52904	A0A8D3E5F1	5.3e-08	36.4	0	1e-07	35.4	0	1.5	1	IPR000210(51...157)	unreviewed	BTB domain-containing protein	601	PF00651	51..156
	Silurus asotus	Chordata	Craniata	Actinopteri	Siluriformes	30991	A0AAD5B370	5.2e-08	36.4	0	1e-07	35.4	0	1.5	1	IPR000210(44...150)	unreviewed	Kelch-like protein 20 isoform X1	596	PF00651	44..149
	Sinocyclocheilus anshuiensis	Chordata	Craniata	Actinopteri	Cypriniformes	1608454	A0A671RSR2	5.1e-08	36.4	0	1e-07	35.4	0	1.5	1	IPR000210(52...158)	unreviewed	BTB domain-containing protein	601	PF00651	52..157
	Sinocyclocheilus grahami	Chordata	Craniata	Actinopteri	Cypriniformes	75366	A0A672N328	5.1e-08	36.4	0	1e-07	35.4	0	1.5	1	IPR000210(41...147)	unreviewed	BTB domain-containing protein	591	PF00651	41..146
	Sinocyclocheilus rhinocerous	Chordata	Craniata	Actinopteri	Cypriniformes	307959	A0A673FKV1	5.2e-08	36.4	0	1e-07	35.4	0	1.5	1	IPR000210(47...153)	unreviewed	BTB domain-containing protein	597	PF00651	47..152
	Sinocyclocheilus rhinocerous	Chordata	Craniata	Actinopteri	Cypriniformes	307959	A0A673FUV0	5.1e-08	36.4	0	1e-07	35.4	0	1.5	1	IPR000210(41...147)	unreviewed	BTB domain-containing protein	591	PF00651	41..146
	Sphaeramia orbicularis	Chordata	Craniata	Actinopteri	Kurtiformes	375764	A0A673CGS4	5.1e-08	36.4	0	1e-07	35.4	0	1.5	1	IPR000210(41...147)	unreviewed	BTB domain-containing protein	591	PF00651	41..146
	Strigops habroptila	Chordata	Craniata	Aves	Psittaciformes	2489341	A0A672UAY8	5.1e-08	36.4	0	1e-07	35.4	0	1.5	1	IPR000210(60...166)	unreviewed	BTB domain-containing protein	591	PF00651	60..165
	Struthio camelus	Chordata	Craniata	Aves	Struthioniformes	441894	A0A093HKX3	5.2e-08	36.4	0	1e-07	35.4	0	1.5	1	IPR000210(52...158)	unreviewed	BTB domain-containing protein	602	PF00651	52..157
	Sus scrofa	Chordata	Craniata	Mammalia	Artiodactyla	9823	A0A8D0K308	5.1e-08	36.4	0	1e-07	35.4	0	1.5	1	IPR000210(41...147)	unreviewed	BTB domain-containing protein	591	PF00651	41..146
	Sus scrofa	Chordata	Craniata	Mammalia	Artiodactyla	9823	A0A8D0SM93	5e-08	36.4	0	1e-07	35.5	0	1.5	1	IPR000210(59...165)	unreviewed	BTB domain-containing protein	582	PF00651	59..164
	Takifugu flavidus	Chordata	Craniata	Actinopteri	Tetraodontiformes	433684	A0A5C6P0P5	5.1e-08	36.4	0	1e-07	35.4	0	1.5	1	IPR000210(41...147)	unreviewed	BTB domain-containing protein	591	PF00651	41..146
	Takifugu rubripes	Chordata	Craniata	Actinopteri	Tetraodontiformes	31033	A0A674N1Z7	4.9e-08	36.5	0	1e-07	35.4	0	1.5	1	IPR000210(54...160)	unreviewed	BTB domain-containing protein	594	PF00651	54..159
	Takifugu rubripes	Chordata	Craniata	Actinopteri	Tetraodontiformes	31033	A0A674PQU8	4.6e-08	36.5	0.3	1e-07	35.4	0.3	1.7	1	IPR000210(31...138)	unreviewed	BTB domain-containing protein	552	PF00651	31..137
	Tinamus guttatus	Chordata	Craniata	Aves	Tinamiformes	94827	A0A099Z1B2	5.2e-08	36.4	0	1e-07	35.4	0	1.5	1	IPR000210(52...158)	unreviewed	BTB domain-containing protein	602	PF00651	52..157
	Trichechus manatus	Chordata	Craniata	Mammalia	Sirenia	127582	A0A2Y9QWR0	5.1e-08	36.4	0	1e-07	35.4	0	1.5	1	IPR000210(41...147)	unreviewed	BTB domain-containing protein	591	PF00651	41..146
	Triplophysa rosa	Chordata	Craniata	Actinopteri	Cypriniformes	992332	A0A9W8C7E1	5.2e-08	36.4	0	1e-07	35.4	0	1.5	1	IPR000210(51...157)	unreviewed	BTB domain-containing protein	601	PF00651	51..156
	Triplophysa tibetana	Chordata	Craniata	Actinopteri	Cypriniformes	1572043	A0A5A9PBL8	5.1e-08	36.4	0	1e-07	35.4	0	1.5	1	IPR000210(41...147)	unreviewed	BTB domain-containing protein	591	PF00651	41..146
	Tursiops truncatus	Chordata	Craniata	Mammalia	Artiodactyla	9739	A0A2U4CQB5	5.1e-08	36.4	0	1e-07	35.4	0	1.5	1	IPR000210(41...147)	unreviewed	BTB domain-containing protein	591	PF00651	41..146
	Tyto alba	Chordata	Craniata	Aves	Strigiformes	56313	A0A093FGG2	5.2e-08	36.4	0	1e-07	35.4	0	1.5	1	IPR000210(52...158)	unreviewed	BTB domain-containing protein	602	PF00651	52..157
	Ursus americanus	Chordata	Craniata	Mammalia	Carnivora	9643	A0A452RZA2	5.2e-08	36.4	0	1e-07	35.4	0	1.5	1	IPR000210(50...156)	unreviewed	BTB domain-containing protein	600	PF00651	50..155
	Xenopus tropicalis	Chordata	Craniata	Amphibia	Anura	8364	A0A6I8QI95	5.2e-08	36.4	0	1e-07	35.4	0	1.5	1	IPR000210(47...153)	unreviewed	BTB domain-containing protein	597	PF00651	47..152
	Xenopus tropicalis	Chordata	Craniata	Amphibia	Anura	8364	F7DPQ6	5.1e-08	36.4	0	1e-07	35.4	0	1.5	1	IPR000210(41...147)	unreviewed	BTB domain-containing protein	591	PF00651	41..146
	Zapornia atra	Chordata	Craniata	Aves	Gruiformes	2585822	A0A7L3FJ56	4.2e-08	36.7	0.2	1e-07	35.4	0.2	1.6	1	IPR000210(37...144)	unreviewed	BTB domain-containing protein	308	PF00651	37..143
	Acanthochromis polyacanthus	Chordata	Craniata	Actinopteri		80966	A0A3Q1ET68	5.1e-08	36.4	0	1.1e-07	35.4	0	1.5	1	IPR000210(73...179)	unreviewed	BTB domain-containing protein	616	PF00651	73..178
	Acanthochromis polyacanthus	Chordata	Craniata	Actinopteri		80966	A0A3Q1FIY1	5.3e-08	36.3	0	1.1e-07	35.4	0	1.5	1	IPR000210(59...165)	unreviewed	BTB domain-containing protein	609	PF00651	59..164
	Acanthochromis polyacanthus	Chordata	Craniata	Actinopteri		80966	A0A3Q1GFS2	4.3e-08	36.6	1.1	1.1e-07	35.3	0.3	2.1	1	IPR000210(31...138)	unreviewed	BTB domain-containing protein	591	PF00651	31..137
	Accipiter nisus	Chordata	Craniata	Aves	Accipitriformes	211598	A0A8B9MR74	5.3e-08	36.3	0	1.1e-07	35.4	0	1.5	1	IPR000210(59...165)	unreviewed	BTB domain-containing protein	611	PF00651	59..164
	Acinonyx jubatus	Chordata	Craniata	Mammalia	Carnivora	32536	A0A6I9ZGE2	5.3e-08	36.3	0	1.1e-07	35.4	0	1.5	1	IPR000210(59...165)	unreviewed	BTB domain-containing protein	609	PF00651	59..164
	Acipenser oxyrinchus	Chordata	Craniata	Actinopteri	Acipenseriformes	40147	A0AAD8D5M0	5.6e-08	36.3	0	1.1e-07	35.3	0	1.5	1	IPR000210(89...195)	unreviewed	Kelch-like protein 20	639	PF00651	89..194
	Acipenser oxyrinchus	Chordata	Craniata	Actinopteri	Acipenseriformes	40147	A0AAD8D9Z6	5.3e-08	36.3	0	1.1e-07	35.4	0	1.5	1	IPR000210(60...166)	unreviewed	Kelch-like protein 20	610	PF00651	60..165
	Ailuropoda melanoleuca	Chordata	Craniata	Mammalia	Carnivora	9646	G1MAT4	5.3e-08	36.3	0	1.1e-07	35.4	0	1.5	1	IPR000210(59...165)	unreviewed	BTB domain-containing protein	609	PF00651	59..164
	Albula glossodonta	Chordata	Craniata	Actinopteri	Albuliformes	121402	A0A8T2PP73	4.3e-08	36.7	1.1	1.1e-07	35.3	0.3	2.1	1	IPR000210(31...138)	unreviewed	BTB domain-containing protein	591	PF00651	31..137
	Aldrovandia affinis	Chordata	Craniata	Actinopteri	Notacanthiformes	143900	A0AAD7RUI6	5.3e-08	36.3	0	1.1e-07	35.4	0	1.5	1	IPR000210(59...165)	unreviewed	Uncharacterized protein	609	PF00651	59..164
	Aldrovandia affinis	Chordata	Craniata	Actinopteri	Notacanthiformes	143900	A0AAD7RXA6	4.3e-08	36.7	1.1	1.1e-07	35.3	0.3	2.1	1	IPR000210(31...138)	unreviewed	Uncharacterized protein	591	PF00651	31..137
	Aldrovandia affinis	Chordata	Craniata	Actinopteri	Notacanthiformes	143900	A0AAD7WNJ9	1.1e-07	35.4	0.4	1.1e-07	35.4	0.4	2.1	1	IPR000210(6...113)	unreviewed	Uncharacterized protein	577	PF00651	6..112
	Alligator mississippiensis	Chordata	Craniata		Crocodylia	8496	A0A151N4K9	4.3e-08	36.6	1.1	1.1e-07	35.3	0.3	2.1	1	IPR000210(30...137)	unreviewed	BTB domain-containing protein	590	PF00651	30..136
	Alligator sinensis	Chordata	Craniata		Crocodylia	38654	A0A1U7RGT8	5.3e-08	36.3	0	1.1e-07	35.4	0	1.5	1	IPR000210(59...165)	unreviewed	BTB domain-containing protein	609	PF00651	59..164
	Alligator sinensis	Chordata	Craniata		Crocodylia	38654	A0A1U7RR45	4.2e-08	36.7	1.1	1.1e-07	35.3	0.3	2.1	1	IPR000210(30...137)	unreviewed	BTB domain-containing protein	588	PF00651	30..135
	Alligator sinensis	Chordata	Craniata		Crocodylia	38654	A0A3Q0FYT3	5.3e-08	36.3	0	1.1e-07	35.4	0	1.5	1	IPR000210(59...165)	unreviewed	BTB domain-containing protein	608	PF00651	59..164
	Amazona aestiva	Chordata	Craniata	Aves	Psittaciformes	12930	A0A0Q3QRX6	4.3e-08	36.6	1.1	1.1e-07	35.3	0.3	2.1	1	IPR000210(30...137)	unreviewed	BTB domain-containing protein	590	PF00651	30..136
	Amazona aestiva	Chordata	Craniata	Aves	Psittaciformes	12930	A0A0Q3XB97	5.3e-08	36.4	0	1.1e-07	35.4	0	1.5	1	IPR000210(59...165)	unreviewed	BTB domain-containing protein	613	PF00651	59..164
	Amazona collaria	Chordata	Craniata	Aves	Psittaciformes	241587	A0A8B9FCE1	4.3e-08	36.6	1.1	1.1e-07	35.3	0.3	2.1	1	IPR000210(33...140)	unreviewed	BTB domain-containing protein	593	PF00651	33..139
	Amazona collaria	Chordata	Craniata	Aves	Psittaciformes	241587	A0A8B9FPL0	5.3e-08	36.4	0	1.1e-07	35.4	0	1.5	1	IPR000210(59...165)	unreviewed	BTB domain-containing protein	609	PF00651	59..164
	Amphiprion percula	Chordata	Craniata	Actinopteri		161767	A0A3P8SJH9	5.3e-08	36.3	0	1.1e-07	35.4	0	1.5	1	IPR000210(59...165)	unreviewed	BTB domain-containing protein	609	PF00651	59..164
	Amphiprion percula	Chordata	Craniata	Actinopteri		161767	A0A3P8U0U4	4.3e-08	36.6	1.1	1.1e-07	35.3	0.3	2.1	1	IPR000210(31...138)	unreviewed	BTB domain-containing protein	591	PF00651	31..137
	Anabas testudineus	Chordata	Craniata	Actinopteri	Anabantiformes	64144	A0A3Q1I5R8	5.3e-08	36.3	0	1.1e-07	35.4	0	1.5	1	IPR000210(59...165)	unreviewed	BTB domain-containing protein	609	PF00651	59..164
	Anabas testudineus	Chordata	Craniata	Actinopteri	Anabantiformes	64144	A0A3Q1IWG3	4.3e-08	36.6	1.1	1.1e-07	35.3	0.3	2.1	1	IPR000210(31...138)	unreviewed	BTB domain-containing protein	591	PF00651	31..137
	Anabas testudineus	Chordata	Craniata	Actinopteri	Anabantiformes	64144	A0A3Q1J0Y6	4.5e-08	36.6	1.1	1.1e-07	35.3	0.3	2.1	1	IPR000210(45...152)	unreviewed	BTB domain-containing protein	605	PF00651	45..151
	Anas platyrhynchos	Chordata	Craniata	Aves	Anseriformes	8840	U3ILB7	4.3e-08	36.7	1.1	1.1e-07	35.3	0.3	2.1	1	IPR000210(30...137)	unreviewed	BTB domain-containing protein	590	PF00651	30..136
	Anas zonorhyncha	Chordata	Craniata	Aves	Anseriformes	75864	A0A8B9USY4	5.3e-08	36.3	0	1.1e-07	35.4	0	1.5	1	IPR000210(59...165)	unreviewed	BTB domain-containing protein	618	PF00651	59..164
	Anas zonorhyncha	Chordata	Craniata	Aves	Anseriformes	75864	A0A8B9VR90	4.5e-08	36.6	1.1	1.1e-07	35.3	0.3	2.1	1	IPR000210(45...152)	unreviewed	BTB domain-containing protein	605	PF00651	45..151
	Anguilla anguilla	Chordata	Craniata	Actinopteri	Anguilliformes	7936	A0A9D3MGG2	5.3e-08	36.3	0	1.1e-07	35.4	0	1.5	1	IPR000210(59...165)	unreviewed	BTB domain-containing protein	609	PF00651	59..164
	Anguilla anguilla	Chordata	Craniata	Actinopteri	Anguilliformes	7936	A0A9D3RM87	4.3e-08	36.7	1.1	1.1e-07	35.3	0.3	2.1	1	IPR000210(31...138)	unreviewed	BTB domain-containing protein	591	PF00651	31..137
	Anolis carolinensis	Chordata	Craniata	Lepidosauria	Squamata	28377	G1KR49	5.3e-08	36.4	0	1.1e-07	35.4	0	1.5	1	IPR000210(59...165)	unreviewed	BTB domain-containing protein	609	PF00651	59..164
	Anser brachyrhynchus	Chordata	Craniata	Aves	Anseriformes	132585	A0A8B9IDD2	5.3e-08	36.3	0	1.1e-07	35.4	0	1.5	1	IPR000210(59...165)	unreviewed	BTB domain-containing protein	618	PF00651	59..164
	Anser cygnoides	Chordata	Craniata	Aves	Anseriformes	8845	A0A8B9EQH3	5.3e-08	36.3	0	1.1e-07	35.4	0	1.5	1	IPR000210(59...165)	unreviewed	BTB domain-containing protein	618	PF00651	59..164
	Aotus nancymaae	Chordata	Craniata	Mammalia	Primates	37293	A0A2K5F5P9	5.3e-08	36.3	0	1.1e-07	35.4	0	1.5	1	IPR000210(59...165)	unreviewed	BTB domain-containing protein	609	PF00651	59..164
	Apaloderma vittatum	Chordata	Craniata	Aves	Trogoniformes	57397	A0A091NZG5	5.2e-08	36.4	0	1.1e-07	35.4	0	1.5	1	IPR000210(52...158)	unreviewed	BTB domain-containing protein	607	PF00651	52..157
	Apteryx mantelli	Chordata	Craniata	Aves	Apterygiformes	202946	A0A8B7JG19	5.2e-08	36.4	0	1.1e-07	35.4	0	1.5	1	IPR000210(62...168)	unreviewed	BTB domain-containing protein	612	PF00651	62..167
	Apteryx mantelli	Chordata	Craniata	Aves	Apterygiformes	202946	A0A8B7JG27	5.3e-08	36.3	0	1.1e-07	35.4	0	1.5	1	IPR000210(59...165)	unreviewed	BTB domain-containing protein	609	PF00651	59..164
	Apteryx mantelli	Chordata	Craniata	Aves	Apterygiformes	202946	A0A8B7JVK3	4.3e-08	36.7	1.1	1.1e-07	35.3	0.3	2.1	1	IPR000210(30...137)	unreviewed	BTB domain-containing protein	590	PF00651	30..136
	Apteryx owenii	Chordata	Craniata	Aves	Apterygiformes	8824	A0A8B9P6P7	4.3e-08	36.7	1.1	1.1e-07	35.3	0.3	2.1	1	IPR000210(30...137)	unreviewed	BTB domain-containing protein	590	PF00651	30..136
	Apteryx owenii	Chordata	Craniata	Aves	Apterygiformes	8824	A0A8B9PXX0	5.6e-08	36.3	0	1.1e-07	35.3	0	1.5	1	IPR000210(59...165)	unreviewed	BTB domain-containing protein	641	PF00651	59..164
	Apteryx owenii	Chordata	Craniata	Aves	Apterygiformes	8824	A0A8B9Q017	5.5e-08	36.3	0	1.1e-07	35.3	0	1.5	1	IPR000210(74...180)	unreviewed	BTB domain-containing protein	633	PF00651	74..179
	Aquila chrysaetos	Chordata	Craniata	Aves	Accipitriformes	223781	A0A663DRH5	5.4e-08	36.3	0	1.1e-07	35.4	0	1.5	1	IPR000210(59...165)	unreviewed	BTB domain-containing protein	617	PF00651	59..164
	Aquila chrysaetos	Chordata	Craniata	Aves	Accipitriformes	223781	A0A663DRY9	5.3e-08	36.3	0	1.1e-07	35.4	0	1.5	1	IPR000210(59...165)	unreviewed	BTB domain-containing protein	609	PF00651	59..164
	Aquila chrysaetos	Chordata	Craniata	Aves	Accipitriformes	223781	A0A663F1W7	4.3e-08	36.6	1.1	1.1e-07	35.3	0.3	2.1	1	IPR000210(33...140)	unreviewed	BTB domain-containing protein	593	PF00651	33..139
	Astatotilapia calliptera	Chordata	Craniata	Actinopteri	Cichliformes	8154	A0A3P8NKR9	5.3e-08	36.3	0	1.1e-07	35.4	0	1.5	1	IPR000210(59...165)	unreviewed	BTB domain-containing protein	609	PF00651	59..164
	Astyanax mexicanus	Chordata	Craniata	Actinopteri	Characiformes	7994	A0A8B9J7C1	4.3e-08	36.6	1.1	1.1e-07	35.3	0.3	2.1	1	IPR000210(31...138)	unreviewed	BTB domain-containing protein	591	PF00651	31..137
	Astyanax mexicanus	Chordata	Craniata	Actinopteri	Characiformes	7994	A0A8B9LVQ4	5.4e-08	36.3	0	1.1e-07	35.4	0	1.5	1	IPR000210(62...168)	unreviewed	BTB domain-containing protein	612	PF00651	62..167
	Astyanax mexicanus	Chordata	Craniata	Actinopteri	Characiformes	7994	A0A8B9LXJ6	5.3e-08	36.4	0	1.1e-07	35.4	0	1.5	1	IPR000210(54...160)	unreviewed	BTB domain-containing protein	604	PF00651	54..159
	Astyanax mexicanus	Chordata	Craniata	Actinopteri	Characiformes	7994	A0A8B9LZ05	5.1e-08	36.4	0	1.1e-07	35.4	0	1.5	1	IPR000210(58...164)	unreviewed	BTB domain-containing protein	608	PF00651	58..163
	Astyanax mexicanus	Chordata	Craniata	Actinopteri	Characiformes	7994	W5L027	4.3e-08	36.6	1.1	1.1e-07	35.3	0.3	2.1	1	IPR000210(31...138)	unreviewed	BTB domain-containing protein	591	PF00651	31..137
	Athene cunicularia	Chordata	Craniata	Aves	Strigiformes	194338	A0A663LTB7	5.3e-08	36.4	0	1.1e-07	35.4	0	1.5	1	IPR000210(59...165)	unreviewed	BTB domain-containing protein	618	PF00651	59..164
	Austrofundulus limnaeus	Chordata	Craniata	Actinopteri	Cyprinodontiformes	52670	A0A2I4AWP4	5.3e-08	36.4	0	1.1e-07	35.4	0	1.5	1	IPR000210(54...160)	unreviewed	BTB domain-containing protein	604	PF00651	54..159
	Austrofundulus limnaeus	Chordata	Craniata	Actinopteri	Cyprinodontiformes	52670	A0A2I4BTW5	4.4e-08	36.6	1.1	1.1e-07	35.3	0.3	2.1	1	IPR000210(31...138)	unreviewed	BTB domain-containing protein	597	PF00651	31..137
	Aythya fuligula	Chordata	Craniata	Aves	Anseriformes	219594	A0A6J3DGC9	5.3e-08	36.3	0	1.1e-07	35.4	0	1.5	1	IPR000210(59...165)	unreviewed	BTB domain-containing protein	609	PF00651	59..164
	Aythya fuligula	Chordata	Craniata	Aves	Anseriformes	219594	A0A6J3E7M0	4.3e-08	36.7	1.1	1.1e-07	35.3	0.3	2.1	1	IPR000210(30...137)	unreviewed	BTB domain-containing protein	590	PF00651	30..136
	Balaenoptera acutorostrata	Chordata	Craniata	Mammalia	Artiodactyla	310752	A0A383YRB4	5.3e-08	36.3	0	1.1e-07	35.4	0	1.5	1	IPR000210(59...165)	unreviewed	BTB domain-containing protein	609	PF00651	59..164
	Balaenoptera musculus	Chordata	Craniata	Mammalia	Artiodactyla	9771	A0A8B8V396	5.3e-08	36.3	0	1.1e-07	35.4	0	1.5	1	IPR000210(59...165)	unreviewed	BTB domain-containing protein	609	PF00651	59..164
	Betta splendens	Chordata	Craniata	Actinopteri	Anabantiformes	158456	A0A6P7L164	5.3e-08	36.3	0	1.1e-07	35.4	0	1.5	1	IPR000210(59...165)	unreviewed	BTB domain-containing protein	609	PF00651	59..164
	Betta splendens	Chordata	Craniata	Actinopteri	Anabantiformes	158456	A0A6P7MZ86	4.3e-08	36.6	1.1	1.1e-07	35.3	0.3	2.1	1	IPR000210(31...138)	unreviewed	BTB domain-containing protein	591	PF00651	31..137
	Bison bison	Chordata	Craniata	Mammalia	Artiodactyla	43346	A0A6P3I0X6	5.3e-08	36.3	0	1.1e-07	35.4	0	1.5	1	IPR000210(59...165)	unreviewed	BTB domain-containing protein	609	PF00651	59..164
	Bos indicus	Chordata	Craniata	Mammalia	Artiodactyla	30522	A0A4W2CJ58	5.3e-08	36.3	0	1.1e-07	35.4	0	1.5	1	IPR000210(59...165)	unreviewed	BTB domain-containing protein	609	PF00651	59..164
	Bos indicus	Chordata	Craniata	Mammalia	Artiodactyla	9915	A0A6P5D1U3	5.3e-08	36.3	0	1.1e-07	35.4	0	1.5	1	IPR000210(59...165)	unreviewed	BTB domain-containing protein	609	PF00651	59..164
	Bos mutus	Chordata	Craniata	Mammalia	Artiodactyla	30521	A0A8B9YM05	5.3e-08	36.3	0	1.1e-07	35.4	0	1.5	1	IPR000210(59...165)	unreviewed	BTB domain-containing protein	609	PF00651	59..164
	Bos taurus	Chordata	Craniata	Mammalia	Artiodactyla	9913	A0AAA9S1J0	5.2e-08	36.4	0	1.1e-07	35.3	0	1.5	1	IPR000210(41...147)	unreviewed	Kelch like family member 20	637	PF00651	41..146
	Bos taurus	Chordata	Craniata	Mammalia	Artiodactyla	9913	Q08DK3	5.3e-08	36.3	0	1.1e-07	35.4	0	1.5	1	IPR000210(59...165)	reviewed	Kelch-like protein 20	609	PF00651	59..164
	Bubo bubo	Chordata	Craniata	Aves	Strigiformes	30461	A0A8C0EKP2	5.3e-08	36.3	0	1.1e-07	35.4	0	1.5	1	IPR000210(62...168)	unreviewed	BTB domain-containing protein	612	PF00651	62..167
	Bubo bubo	Chordata	Craniata	Aves	Strigiformes	30461	A0A8C0EMS5	5.3e-08	36.4	0	1.1e-07	35.4	0	1.5	1	IPR000210(55...161)	unreviewed	BTB domain-containing protein	605	PF00651	55..160
	Buteo japonicus	Chordata	Craniata	Aves	Accipitriformes	224669	A0A8B9Z3X4	4.3e-08	36.6	1.1	1.1e-07	35.3	0.3	2.1	1	IPR000210(33...140)	unreviewed	BTB domain-containing protein	593	PF00651	33..139
	Buteo japonicus	Chordata	Craniata	Aves	Accipitriformes	224669	A0A8C0HL24	5.3e-08	36.3	0	1.1e-07	35.4	0	1.5	1	IPR000210(60...166)	unreviewed	BTB domain-containing protein	610	PF00651	60..165
	Caenorhabditis briggsae	Nematoda		Chromadorea	Rhabditida	6238	A0AAE9E3J2	5.7e-08	36.2	0.3	1.1e-07	35.3	0.3	1.4	1	IPR000210(48...154)	unreviewed	Uncharacterized protein	612	PF00651	48..153
	Caenorhabditis briggsae	Nematoda		Chromadorea	Rhabditida	6238	A0AAE9IZK7	5.7e-08	36.2	0.3	1.1e-07	35.3	0.3	1.4	1	IPR000210(48...154)	unreviewed	Uncharacterized protein	612	PF00651	48..153
	Caenorhabditis briggsae	Nematoda		Chromadorea	Rhabditida	6238	A8XEJ4	5.6e-08	36.3	0.3	1.1e-07	35.3	0.3	1.5	1	IPR000210(48...141)	unreviewed	BTB domain-containing protein	599	PF00651	48..140
	Caenorhabditis nigoni	Nematoda		Chromadorea	Rhabditida	1611254	A0A2G5VI70	5.7e-08	36.2	0.3	1.1e-07	35.3	0.3	1.4	1	IPR000210(48...154)	unreviewed	BTB domain-containing protein	612	PF00651	48..153
	Cairina moschata	Chordata	Craniata	Aves	Anseriformes	1240228	A0A8C3BI26	5.3e-08	36.3	0	1.1e-07	35.4	0	1.5	1	IPR000210(59...165)	unreviewed	BTB domain-containing protein	618	PF00651	59..164
	Cairina moschata	Chordata	Craniata	Aves	Anseriformes	1240228	A0A8C3BQM7	4.3e-08	36.7	1.1	1.1e-07	35.3	0.3	2.1	1	IPR000210(30...137)	unreviewed	BTB domain-containing protein	590	PF00651	30..136
	Cairina moschata	Chordata	Craniata	Aves	Anseriformes	1240228	A0A8C3GFS2	5.3e-08	36.3	0	1.1e-07	35.4	0	1.5	1	IPR000210(59...165)	unreviewed	BTB domain-containing protein	608	PF00651	59..164
	Calidris pygmaea	Chordata	Craniata	Aves	Charadriiformes	425635	A0A8C3JPU3	5.3e-08	36.4	0	1.1e-07	35.3	0	1.5	1	IPR000210(59...165)	unreviewed	BTB domain-containing protein	627	PF00651	59..164
	Calidris pygmaea	Chordata	Craniata	Aves	Charadriiformes	425635	A0A8C3JRC3	5.3e-08	36.3	0	1.1e-07	35.4	0	1.5	1	IPR000210(59...165)	unreviewed	BTB domain-containing protein	611	PF00651	59..164
	Calidris pygmaea	Chordata	Craniata	Aves	Charadriiformes	425635	A0A8C3KEV6	4.3e-08	36.7	1.1	1.1e-07	35.3	0.3	2.1	1	IPR000210(30...137)	unreviewed	BTB domain-containing protein	590	PF00651	30..136
	Callithrix jacchus	Chordata	Craniata	Mammalia	Primates	9483	F7FYX2	5.3e-08	36.4	0	1.1e-07	35.4	0	1.5	1	IPR000210(57...163)	unreviewed	BTB domain-containing protein	607	PF00651	57..162
	Callithrix jacchus	Chordata	Craniata	Mammalia	Primates	9483	U3E5Z3	5.3e-08	36.3	0	1.1e-07	35.4	0	1.5	1	IPR000210(59...165)	unreviewed	BTB domain-containing protein	609	PF00651	59..164
	Callorhinchus milii	Chordata	Craniata	Chondrichthyes	Chimaeriformes	7868	A0A4W3H3D4	5.1e-08	36.4	0	1.1e-07	35.4	0	1.5	1	IPR000210(59...165)	unreviewed	BTB domain-containing protein	609	PF00651	59..164
	Callorhinus ursinus	Chordata	Craniata	Mammalia	Carnivora	34884	A0A3Q7PJ45	5.3e-08	36.3	0	1.1e-07	35.4	0	1.5	1	IPR000210(59...165)	unreviewed	BTB domain-containing protein	609	PF00651	59..164
	Camelus bactrianus	Chordata	Craniata	Mammalia	Artiodactyla	9837	A0A9W3HGT2	5.3e-08	36.4	0	1.1e-07	35.4	0	1.5	1	IPR000210(57...163)	unreviewed	BTB domain-containing protein	622	PF00651	57..162
	Camelus ferus	Chordata	Craniata	Mammalia	Artiodactyla	419612	A0A8B6Y5J6	5.3e-08	36.3	0	1.1e-07	35.4	0	1.5	1	IPR000210(59...165)	unreviewed	BTB domain-containing protein	609	PF00651	59..164
	Canis lupus	Chordata	Craniata	Mammalia	Carnivora	9615	A0A8C0LZF2	5.3e-08	36.3	0	1.1e-07	35.4	0	1.5	1	IPR000210(59...165)	unreviewed	BTB domain-containing protein	609	PF00651	59..164
	Canis lupus	Chordata	Craniata	Mammalia	Carnivora	9615	A0A8C0LZN1	5.3e-08	36.4	0	1.1e-07	35.4	0	1.5	1	IPR000210(54...160)	unreviewed	BTB domain-containing protein	604	PF00651	54..159
	Canis lupus	Chordata	Craniata	Mammalia	Carnivora	9615	A0A8I3N9S1	5.3e-08	36.4	0	1.1e-07	35.4	0	1.5	1	IPR000210(54...160)	unreviewed	BTB domain-containing protein	604	PF00651	54..159
	Canis lupus	Chordata	Craniata	Mammalia	Carnivora	9615	A0A8I3N9W4	5.3e-08	36.3	0	1.1e-07	35.4	0	1.5	1	IPR000210(59...165)	unreviewed	BTB domain-containing protein	609	PF00651	59..164
	Capra hircus	Chordata	Craniata	Mammalia	Artiodactyla	9925	A0A452F0N4	5.3e-08	36.4	0	1.1e-07	35.4	0	1.5	1	IPR000210(58...164)	unreviewed	BTB domain-containing protein	608	PF00651	58..163
	Capra hircus	Chordata	Craniata	Mammalia	Artiodactyla	9925	A0A452F0Y5	5.3e-08	36.3	0	1.1e-07	35.4	0	1.5	1	IPR000210(59...165)	unreviewed	BTB domain-containing protein	609	PF00651	59..164
	Carassius auratus	Chordata	Craniata	Actinopteri	Cypriniformes	7957	A0A6P6JPD9	5.6e-08	36.3	0	1.1e-07	35.3	0	1.5	1	IPR000210(83...189)	unreviewed	BTB domain-containing protein	637	PF00651	83..188
	Carassius auratus	Chordata	Craniata	Actinopteri	Cypriniformes	7957	A0A6P6JR58	5.6e-08	36.3	0	1.1e-07	35.3	0	1.5	1	IPR000210(83...189)	unreviewed	BTB domain-containing protein	633	PF00651	83..188
	Carassius auratus	Chordata	Craniata	Actinopteri	Cypriniformes	7957	A0A6P6MLM0	4.3e-08	36.6	1.1	1.1e-07	35.3	0.3	2.1	1	IPR000210(31...138)	unreviewed	BTB domain-containing protein	591	PF00651	31..137
	Carassius auratus	Chordata	Craniata	Actinopteri	Cypriniformes	7957	A0A9E7VC59	4.3e-08	36.6	1.1	1.1e-07	35.3	0.3	2.1	1	IPR000210(31...139)	unreviewed	BTB domain-containing protein	591	PF00651	31..138
	Carassius auratus	Chordata	Craniata	Actinopteri	Cypriniformes	7957	A0A9E7VC94	5.5e-08	36.3	0	1.1e-07	35.3	0	1.5	1	IPR000210(58...168)	unreviewed	BTB domain-containing protein	648	PF00651	58..167
	Carassius gibelio	Chordata	Craniata	Actinopteri	Cypriniformes	101364	A0A9E8DGF4	4.3e-08	36.6	1.1	1.1e-07	35.3	0.3	2.1	1	IPR000210(31...139)	unreviewed	BTB domain-containing protein	592	PF00651	31..138
	Carassius gibelio	Chordata	Craniata	Actinopteri	Cypriniformes	101364	A0A9E8DGJ1	5.3e-08	36.3	0	1.1e-07	35.4	0	1.5	1	IPR000210(41...147)	unreviewed	BTB domain-containing protein	617	PF00651	41..146
	Cariama cristata	Chordata	Craniata	Aves	Cariamiformes	54380	A0A091M6X3	4.3e-08	36.6	1.1	1.1e-07	35.3	0.3	2.1	1	IPR000210(34...141)	unreviewed	BTB domain-containing protein	594	PF00651	34..140
	Carlito syrichta	Chordata	Craniata	Mammalia	Primates	1868482	A0A1U7TCJ1	5.3e-08	36.3	0	1.1e-07	35.4	0	1.5	1	IPR000210(59...165)	unreviewed	BTB domain-containing protein	609	PF00651	59..164
	Castor canadensis	Chordata	Craniata	Mammalia	Rodentia	51338	A0A250Y3A1	5.3e-08	36.4	0	1.1e-07	35.4	0	1.5	1	IPR000210(54...160)	unreviewed	BTB domain-containing protein	604	PF00651	54..159
	Castor canadensis	Chordata	Craniata	Mammalia	Rodentia	51338	A0A8B7VLB8	5.3e-08	36.3	0	1.1e-07	35.4	0	1.5	1	IPR000210(59...165)	unreviewed	BTB domain-containing protein	609	PF00651	59..164
	Catagonus wagneri	Chordata	Craniata	Mammalia	Artiodactyla	51154	A0A8C3X8J3	5.3e-08	36.3	0	1.1e-07	35.4	0	1.5	1	IPR000210(59...165)	unreviewed	BTB domain-containing protein	609	PF00651	59..164
	Catharus ustulatus	Chordata	Craniata	Aves	Passeriformes	91951	A0A8C3TRG3	5.3e-08	36.4	0	1.1e-07	35.4	0	1.5	1	IPR000210(57...163)	unreviewed	BTB domain-containing protein	607	PF00651	57..162
	Cavia porcellus	Chordata	Craniata	Mammalia	Rodentia	10141	A0A286XYU4	5.3e-08	36.3	0	1.1e-07	35.4	0	1.5	1	IPR000210(59...165)	unreviewed	BTB domain-containing protein	609	PF00651	59..164
	Cavia porcellus	Chordata	Craniata	Mammalia	Rodentia	10141	H0V3M0	5.3e-08	36.4	0	1.1e-07	35.4	0	1.5	1	IPR000210(54...160)	unreviewed	BTB domain-containing protein	604	PF00651	54..159
	Cebus imitator	Chordata	Craniata	Mammalia	Primates	2715852	A0A2K5S736	5.2e-08	36.4	0	1.1e-07	35.4	0	1.5	1	IPR000210(53...159)	unreviewed	BTB domain-containing protein	603	PF00651	53..158
	Cebus imitator	Chordata	Craniata	Mammalia	Primates	2715852	A0A2K5S737	5.3e-08	36.3	0	1.1e-07	35.4	0	1.5	1	IPR000210(59...165)	unreviewed	BTB domain-containing protein	609	PF00651	59..164
	Cepphus grylle	Chordata	Craniata	Aves	Charadriiformes	28697	A0A7L3RYA3	4.3e-08	36.6	1.1	1.1e-07	35.3	0.3	2.1	1	IPR000210(34...141)	unreviewed	BTB domain-containing protein	594	PF00651	34..140
	Cercocebus atys	Chordata	Craniata	Mammalia	Primates	9531	A0A2K5LWH2	5.3e-08	36.4	0	1.1e-07	35.4	0	1.5	1	IPR000210(59...165)	unreviewed	BTB domain-containing protein	609	PF00651	59..164
	Channa argus	Chordata	Craniata	Actinopteri	Anabantiformes	215402	A0A6G1Q2V1	4.4e-08	36.6	1.1	1.1e-07	35.3	0.3	2.1	1	IPR000210(31...138)	unreviewed	BTB domain-containing protein	597	PF00651	31..137
	Channa argus	Chordata	Craniata	Actinopteri	Anabantiformes	215402	A0A6G1Q9B1	5.3e-08	36.4	0	1.1e-07	35.4	0	1.5	1	IPR000210(57...163)	unreviewed	BTB domain-containing protein	607	PF00651	57..162
	Channa striata	Chordata	Craniata	Actinopteri	Anabantiformes	64152	A0AA88N501	4.3e-08	36.6	1.1	1.1e-07	35.3	0.3	2.1	1	IPR000210(31...138)	unreviewed	BTB domain-containing protein	591	PF00651	31..137
	Chanos chanos	Chordata	Craniata	Actinopteri	Gonorynchiformes	29144	A0A6J2UXX8	4.3e-08	36.6	1.1	1.1e-07	35.3	0.3	2.1	1	IPR000210(31...138)	unreviewed	BTB domain-containing protein	591	PF00651	31..137
	Chanos chanos	Chordata	Craniata	Actinopteri	Gonorynchiformes	29144	A0A6J2VEL4	5.3e-08	36.3	0	1.1e-07	35.4	0	1.5	1	IPR000210(59...165)	unreviewed	BTB domain-containing protein	609	PF00651	59..164
	Chelonoidis abingdonii	Chordata	Craniata		Testudines	106734	A0A8C0J0U1	5.3e-08	36.3	0	1.1e-07	35.4	0	1.5	1	IPR000210(59...165)	unreviewed	BTB domain-containing protein	609	PF00651	59..164
	Chelonoidis abingdonii	Chordata	Craniata		Testudines	106734	A0A8C0JEE3	4.4e-08	36.6	1.1	1.1e-07	35.3	0.3	2.1	1	IPR000210(36...143)	unreviewed	BTB domain-containing protein	596	PF00651	36..142
	Chelydra serpentina	Chordata	Craniata		Testudines	8475	A0A8C3SY92	5.3e-08	36.3	0	1.1e-07	35.4	0	1.5	1	IPR000210(59...165)	unreviewed	BTB domain-containing protein	609	PF00651	59..164
	Chelydra serpentina	Chordata	Craniata		Testudines	8475	A0A8C3T107	4.3e-08	36.6	1.1	1.1e-07	35.3	0.3	2.1	1	IPR000210(35...141)	unreviewed	BTB domain-containing protein	594	PF00651	35..140
	Chelydra serpentina	Chordata	Craniata		Testudines	8475	A0A8T1T606	4.3e-08	36.7	1.1	1.1e-07	35.3	0.3	2.1	1	IPR000210(31...137)	unreviewed	BTB domain-containing protein	590	PF00651	31..136
	Chiloscyllium punctatum	Chordata	Craniata	Chondrichthyes	Orectolobiformes	137246	A0A401SJ34	5.4e-08	36.3	0	1.1e-07	35.3	0	1.5	1	IPR000210(92...198)	unreviewed	BTB domain-containing protein	642	PF00651	92..197
	Chinchilla lanigera	Chordata	Craniata	Mammalia	Rodentia	34839	A0A8C2VGT6	5.3e-08	36.4	0	1.1e-07	35.4	0	1.5	1	IPR000210(54...160)	unreviewed	BTB domain-containing protein	604	PF00651	54..159
	Chinchilla lanigera	Chordata	Craniata	Mammalia	Rodentia	34839	A0A8C2VJG9	5.2e-08	36.4	0	1.1e-07	35.4	0	1.5	1	IPR000210(54...160)	unreviewed	BTB domain-containing protein	604	PF00651	54..159
	Chlorocebus sabaeus	Chordata	Craniata	Mammalia	Primates	60711	A0A0D9RH98	5.3e-08	36.3	0	1.1e-07	35.4	0	1.5	1	IPR000210(59...165)	unreviewed	BTB domain-containing protein	609	PF00651	59..164
	Chrysemys picta	Chordata	Craniata		Testudines	8478	A0A8C3HMA1	5.4e-08	36.3	0	1.1e-07	35.4	0	1.5	1	IPR000210(59...165)	unreviewed	BTB domain-containing protein	619	PF00651	59..164
	Chrysemys picta	Chordata	Craniata		Testudines	8478	A0A8C3HMW2	5.5e-08	36.3	0	1.1e-07	35.3	0	1.5	1	IPR000210(59...165)	unreviewed	BTB domain-containing protein	623	PF00651	59..164
	Chrysemys picta	Chordata	Craniata		Testudines	8478	A0A8C3ICM0	4.3e-08	36.6	1.1	1.1e-07	35.3	0.3	2.1	1	IPR000210(30...137)	unreviewed	BTB domain-containing protein	590	PF00651	30..136
	Chrysemys picta	Chordata	Craniata		Testudines	8478	A0A8C3P723	5.3e-08	36.3	0	1.1e-07	35.4	0	1.5	1	IPR000210(59...165)	unreviewed	BTB domain-containing protein	608	PF00651	59..164
	Chrysochloris asiatica	Chordata	Craniata	Mammalia		185453	A0A9B0TNH4	5.3e-08	36.3	0	1.1e-07	35.4	0	1.5	1	IPR000210(59...165)	unreviewed	BTB domain-containing protein	609	PF00651	59..164
	Chrysolophus pictus	Chordata	Craniata	Aves	Galliformes	9089	A0A8C3L5Q9	5.3e-08	36.4	0	1.1e-07	35.4	0	1.5	1	IPR000210(60...166)	unreviewed	BTB domain-containing protein	603	PF00651	60..165
	Chrysolophus pictus	Chordata	Craniata	Aves	Galliformes	9089	A0A8C3L6E2	5.2e-08	36.4	0	1.1e-07	35.4	0	1.5	1	IPR000210(63...169)	unreviewed	BTB domain-containing protein	606	PF00651	63..168
	Cirrhinus molitorella	Chordata	Craniata	Actinopteri	Cypriniformes	172907	A0AA88PLG4	4.3e-08	36.7	1.1	1.1e-07	35.3	0.3	2.1	1	IPR000210(30...137)	unreviewed	BTB domain-containing protein	590	PF00651	30..136
	Clupea harengus	Chordata	Craniata	Actinopteri	Clupeiformes	7950	A0A6P3VUW8	5.3e-08	36.3	0	1.1e-07	35.4	0	1.5	1	IPR000210(59...165)	unreviewed	BTB domain-containing protein	609	PF00651	59..164
	Colobus angolensis	Chordata	Craniata	Mammalia	Primates	336983	A0A2K5HKQ9	5.3e-08	36.3	0	1.1e-07	35.4	0	1.5	1	IPR000210(59...165)	unreviewed	BTB domain-containing protein	609	PF00651	59..164
	Conger conger	Chordata	Craniata	Actinopteri	Anguilliformes	82655	A0A9Q1DL53	5.1e-08	36.4	0	1.1e-07	35.4	0	1.5	1	IPR000210(59...165)	unreviewed	BTB domain-containing protein	619	PF00651	59..164
	Coregonus sp.	Chordata	Craniata	Actinopteri	Salmoniformes	861768	A0A6F9A2Y3	5.3e-08	36.3	0	1.1e-07	35.4	0	1.5	1	IPR000210(59...165)	unreviewed	BTB domain-containing protein	609	PF00651	59..164
	Coregonus sp.	Chordata	Craniata	Actinopteri	Salmoniformes	861768	A0A6F9AR93	5.4e-08	36.3	0	1.1e-07	35.4	0	1.5	1	IPR000210(66...172)	unreviewed	BTB domain-containing protein	607	PF00651	66..171
	Corvus moneduloides	Chordata	Craniata	Aves	Passeriformes	1196302	A0A8U7NC65	4.3e-08	36.7	1.1	1.1e-07	35.3	0.3	2.1	1	IPR000210(30...137)	unreviewed	Uncharacterized protein	590	PF00651	30..136
	Cottoperca gobio	Chordata	Craniata	Actinopteri	Perciformes	56716	A0A6J2PZH7	4.3e-08	36.6	1.1	1.1e-07	35.3	0.3	2.1	1	IPR000210(31...138)	unreviewed	BTB domain-containing protein	597	PF00651	31..137
	Cottoperca gobio	Chordata	Craniata	Actinopteri	Perciformes	56716	A0A6J2RGR9	5.3e-08	36.3	0	1.1e-07	35.4	0	1.5	1	IPR000210(59...165)	unreviewed	BTB domain-containing protein	609	PF00651	59..164
	Coturnix japonica	Chordata	Craniata	Aves	Galliformes	93934	A0A8C2TGA6	4.3e-08	36.7	1.1	1.1e-07	35.3	0.3	2.1	1	IPR000210(30...137)	unreviewed	BTB domain-containing protein	590	PF00651	30..136
	Cricetulus griseus	Chordata	Craniata	Mammalia	Rodentia	10029	A0A061I3G5	5.5e-08	36.3	0	1.1e-07	35.3	0	1.5	1	IPR000210(59...165)	unreviewed	BTB domain-containing protein	636	PF00651	59..164
	Cricetulus griseus	Chordata	Craniata	Mammalia	Rodentia	10029	A0A8C2MYC2	5.3e-08	36.3	0	1.1e-07	35.4	0	1.5	1	IPR000210(59...165)	unreviewed	BTB domain-containing protein	609	PF00651	59..164
	Cricetulus griseus	Chordata	Craniata	Mammalia	Rodentia	10029	A0A8C2MZR5	5.3e-08	36.4	0	1.1e-07	35.4	0	1.5	1	IPR000210(54...160)	unreviewed	BTB domain-containing protein	604	PF00651	54..159
	Crocodylus porosus	Chordata	Craniata		Crocodylia	8502	A0A7M4E3T2	4.3e-08	36.6	1.1	1.1e-07	35.3	0.3	2.1	1	IPR000210(30...137)	unreviewed	BTB domain-containing protein	590	PF00651	30..136
	Crocodylus porosus	Chordata	Craniata		Crocodylia	8502	A0A7M4ED96	5.3e-08	36.3	0	1.1e-07	35.4	0	1.5	1	IPR000210(59...165)	unreviewed	BTB domain-containing protein	608	PF00651	59..164
	Crocodylus porosus	Chordata	Craniata		Crocodylia	8502	A0A7M4EDA4	5.3e-08	36.3	0	1.1e-07	35.4	0	1.5	1	IPR000210(59...165)	unreviewed	BTB domain-containing protein	609	PF00651	59..164
	Crocuta crocuta	Chordata	Craniata	Mammalia	Carnivora	9678	A0A6G1AZR7	5.3e-08	36.3	0	1.1e-07	35.4	0	1.5	1	IPR000210(60...166)	unreviewed	BTB domain-containing protein	610	PF00651	60..165
	Crotalus adamanteus	Chordata	Craniata	Lepidosauria	Squamata	8729	J3SEK5	5.3e-08	36.3	0	1.1e-07	35.4	0	1.5	1	IPR000210(59...165)	unreviewed	BTB domain-containing protein	609	PF00651	59..164
	Cyanoderma ruficeps	Chordata	Craniata	Aves	Passeriformes	181631	A0A8C3NMR3	5.3e-08	36.4	0	1.1e-07	35.4	0	1.5	1	IPR000210(59...165)	unreviewed	BTB domain-containing protein	618	PF00651	59..164
	Cyclopterus lumpus	Chordata	Craniata	Actinopteri	Perciformes	8103	A0A8C3AWB0	5.3e-08	36.3	0	1.1e-07	35.4	0	1.5	1	IPR000210(59...165)	unreviewed	BTB domain-containing protein	609	PF00651	59..164
	Cynoglossus semilaevis	Chordata	Craniata	Actinopteri	Pleuronectiformes	244447	A0A3P8V6F7	4.3e-08	36.6	1.1	1.1e-07	35.3	0.3	2.1	1	IPR000210(31...138)	unreviewed	BTB domain-containing protein	591	PF00651	31..137
	Cynoglossus semilaevis	Chordata	Craniata	Actinopteri	Pleuronectiformes	244447	A0A3P8WZH9	5.3e-08	36.4	0	1.1e-07	35.4	0	1.5	1	IPR000210(54...160)	unreviewed	BTB domain-containing protein	604	PF00651	54..159
	Cynoglossus semilaevis	Chordata	Craniata	Actinopteri	Pleuronectiformes	244447	A0A3P8X1E9	5.2e-08	36.4	0	1.1e-07	35.4	0	1.5	1	IPR000210(54...160)	unreviewed	BTB domain-containing protein	603	PF00651	54..159
	Cyprinodon variegatus	Chordata	Craniata	Actinopteri	Cyprinodontiformes	28743	A0A3Q2CC00	5.3e-08	36.3	0	1.1e-07	35.4	0	1.5	1	IPR000210(59...165)	unreviewed	BTB domain-containing protein	609	PF00651	59..164
	Cyprinodon variegatus	Chordata	Craniata	Actinopteri	Cyprinodontiformes	28743	A0A3Q2FKU3	4.3e-08	36.6	1.1	1.1e-07	35.3	0.3	2.1	1	IPR000210(31...138)	unreviewed	BTB domain-containing protein	591	PF00651	31..137
	Cyprinus carpio	Chordata	Craniata	Actinopteri	Cypriniformes	630221	A0A8C1BWV1	4.5e-08	36.6	1.1	1.1e-07	35.3	0.3	2.1	1	IPR000210(46...153)	unreviewed	BTB domain-containing protein	606	PF00651	46..152
	Cyprinus carpio	Chordata	Craniata	Actinopteri	Cypriniformes	630221	A0A8C1C111	4.3e-08	36.6	1.1	1.1e-07	35.3	0.3	2.1	1	IPR000210(31...138)	unreviewed	BTB domain-containing protein	591	PF00651	31..137
	Cyprinus carpio	Chordata	Craniata	Actinopteri	Cypriniformes	7962	A0A8C1GAL3	4.4e-08	36.6	1.1	1.1e-07	35.3	0.3	2.1	1	IPR000210(40...147)	unreviewed	BTB domain-containing protein	600	PF00651	40..146
	Cyprinus carpio	Chordata	Craniata	Actinopteri	Cypriniformes	7962	A0A8C1I7D2	4.3e-08	36.6	1.1	1.1e-07	35.3	0.3	2.1	1	IPR000210(31...138)	unreviewed	BTB domain-containing protein	591	PF00651	31..137
	Cyprinus carpio	Chordata	Craniata	Actinopteri	Cypriniformes	7962	A0A8C1LIL4	5.7e-08	36.3	0	1.1e-07	35.3	0	1.5	1	IPR000210(83...189)	unreviewed	BTB domain-containing protein	642	PF00651	83..188
	Cyprinus carpio	Chordata	Craniata	Actinopteri	Cypriniformes	7962	A0A8C1LN48	5.6e-08	36.3	0	1.1e-07	35.3	0	1.5	1	IPR000210(83...189)	unreviewed	BTB domain-containing protein	633	PF00651	83..188
	Cyprinus carpio	Chordata	Craniata	Actinopteri	Cypriniformes	7962	A0A8C1N876	5.3e-08	36.3	0	1.1e-07	35.4	0	1.5	1	IPR000210(62...166)	unreviewed	BTB domain-containing protein	610	PF00651	62..165
	Cyprinus carpio	Chordata	Craniata	Actinopteri	Cypriniformes	7962	A0A8C1TPB5	5.3e-08	36.4	0	1.1e-07	35.4	0	1.5	1	IPR000210(55...161)	unreviewed	BTB domain-containing protein	605	PF00651	55..160
	Cyprinus carpio	Chordata	Craniata	Actinopteri	Cypriniformes	7962	A0A8C1TS07	5.3e-08	36.4	0	1.1e-07	35.4	0	1.5	1	IPR000210(58...164)	unreviewed	BTB domain-containing protein	608	PF00651	58..163
	Cyprinus carpio	Chordata	Craniata	Actinopteri	Cypriniformes	7962	A0A8C1UKV1	4.3e-08	36.6	1.1	1.1e-07	35.3	0.3	2.1	1	IPR000210(31...138)	unreviewed	BTB domain-containing protein	591	PF00651	31..137
	Cyprinus carpio	Chordata	Craniata	Actinopteri	Cypriniformes	7962	A0A8C1ULZ5	4.3e-08	36.6	1.1	1.1e-07	35.3	0.3	2.1	1	IPR000210(40...147)	unreviewed	BTB domain-containing protein	597	PF00651	40..146
	Cyprinus carpio	Chordata	Craniata	Actinopteri	Cypriniformes	7962	A0A8C1WZL3	5.2e-08	36.4	0	1.1e-07	35.4	0	1.5	1	IPR000210(57...161)	unreviewed	BTB domain-containing protein	605	PF00651	57..160
	Cyprinus carpio	Chordata	Craniata	Actinopteri	Cypriniformes	7962	A0A8C1X004	5.2e-08	36.4	0	1.1e-07	35.4	0	1.5	1	IPR000210(57...161)	unreviewed	BTB domain-containing protein	605	PF00651	57..160
	Cyprinus carpio	Chordata	Craniata	Actinopteri	Cypriniformes	7962	A0A8C2D3H4	5.6e-08	36.3	0	1.1e-07	35.3	0	1.5	1	IPR000210(83...189)	unreviewed	BTB domain-containing protein	634	PF00651	83..188
	Cyprinus carpio	Chordata	Craniata	Actinopteri	Cypriniformes	7962	A0A8C2GE11	4.3e-08	36.7	1.1	1.1e-07	35.3	0.3	2.1	1	IPR000210(31...138)	unreviewed	BTB domain-containing protein	589	PF00651	31..137
	Cyprinus carpio	Chordata	Craniata	Actinopteri	Cypriniformes	7962	A0A8C2H5N0	5.3e-08	36.3	0	1.1e-07	35.4	0	1.5	1	IPR000210(60...166)	unreviewed	BTB domain-containing protein	610	PF00651	60..165
	Cyprinus carpio	Chordata	Craniata	Actinopteri	Cypriniformes	7962	A0A8C2HUK9	4.1e-08	36.7	1.1	1.1e-07	35.4	0.3	2.1	1	IPR000210(31...138)	unreviewed	BTB domain-containing protein	577	PF00651	31..137
	Cyprinus carpio	Chordata	Craniata	Actinopteri	Cypriniformes	7962	A0A8C2IL17	5.3e-08	36.3	0	1.1e-07	35.3	0	1.5	1	IPR000210(62...166)	unreviewed	BTB domain-containing protein	632	PF00651	62..165
	Cyprinus carpio	Chordata	Craniata	Actinopteri	Cypriniformes	7962	A0A8C2INI0	5.2e-08	36.4	0	1.1e-07	35.3	0	1.5	1	IPR000210(57...161)	unreviewed	BTB domain-containing protein	627	PF00651	57..160
	Cyprinus carpio	Chordata	Craniata	Actinopteri	Cypriniformes	630221	A0A9J7XR86	5.2e-08	36.4	0	1.1e-07	35.4	0	1.5	1	IPR000210(57...161)	unreviewed	BTB domain-containing protein	605	PF00651	57..160
	Cyprinus carpio	Chordata	Craniata	Actinopteri	Cypriniformes	630221	A0A9J8CQ91	5.6e-08	36.3	0	1.1e-07	35.3	0	1.5	1	IPR000210(83...189)	unreviewed	BTB domain-containing protein	633	PF00651	83..188
	Cyprinus carpio	Chordata	Craniata	Actinopteri	Cypriniformes	7962	A0A9Q9VGY2	5.6e-08	36.3	0	1.1e-07	35.3	0	1.5	1	IPR000210(83...189)	unreviewed	BTB domain-containing protein	633	PF00651	83..188
	Cyprinus carpio	Chordata	Craniata	Actinopteri	Cypriniformes	7962	A0A9Q9VGZ4	5.6e-08	36.3	0	1.1e-07	35.3	0	1.5	1	IPR000210(83...189)	unreviewed	BTB domain-containing protein	637	PF00651	83..188
	Cyprinus carpio	Chordata	Craniata	Actinopteri	Cypriniformes	7962	A0A9R0AQ97	4.3e-08	36.7	1.1	1.1e-07	35.3	0.3	2.1	1	IPR000210(31...138)	unreviewed	BTB domain-containing protein	591	PF00651	31..137
	Cyprinus carpio	Chordata	Craniata	Actinopteri	Cypriniformes	630221	A0A9R1SJQ6	5.2e-08	36.4	0	1.1e-07	35.4	0	1.5	1	IPR000210(57...161)	unreviewed	BTB domain-containing protein	605	PF00651	57..160
	Cyprinus carpio	Chordata	Craniata	Actinopteri	Cypriniformes	630221	A0A9R1SLP9	5.3e-08	36.3	0	1.1e-07	35.4	0	1.5	1	IPR000210(62...166)	unreviewed	BTB domain-containing protein	610	PF00651	62..165
	Danio rerio	Chordata	Craniata	Actinopteri	Cypriniformes	7955	A0A8M2B929	4.3e-08	36.6	1.1	1.1e-07	35.3	0.3	2.1	1	IPR000210(31...138)	unreviewed	BTB domain-containing protein	591	PF00651	31..137
	Danionella translucida	Chordata	Craniata	Actinopteri	Cypriniformes	623744	A0A553R350	4.3e-08	36.6	1.1	1.1e-07	35.3	0.3	2.1	1	IPR000210(30...137)	unreviewed	BTB domain-containing protein	590	PF00651	30..136
	Delphinapterus leucas	Chordata	Craniata	Mammalia	Artiodactyla	9749	A0A2Y9MUS8	5.3e-08	36.3	0	1.1e-07	35.4	0	1.5	1	IPR000210(59...165)	unreviewed	BTB domain-containing protein	609	PF00651	59..164
	Denticeps clupeoides	Chordata	Craniata	Actinopteri	Clupeiformes	299321	A0A8C3Z2Y9	5.3e-08	36.3	0	1.1e-07	35.4	0	1.5	1	IPR000210(59...165)	unreviewed	BTB domain-containing protein	609	PF00651	59..164
	Denticeps clupeoides	Chordata	Craniata	Actinopteri	Clupeiformes	299321	A0A8C3Z2Z9	5.3e-08	36.4	0	1.1e-07	35.4	0	1.5	1	IPR000210(53...159)	unreviewed	BTB domain-containing protein	603	PF00651	53..158
	Denticeps clupeoides	Chordata	Craniata	Actinopteri	Clupeiformes	299321	A0A8C3Z3M5	5.6e-08	36.3	0	1.1e-07	35.3	0	1.5	1	IPR000210(80...186)	unreviewed	BTB domain-containing protein	630	PF00651	80..185
	Denticeps clupeoides	Chordata	Craniata	Actinopteri	Clupeiformes	299321	A0A8C3Z3N5	5.3e-08	36.3	0	1.1e-07	35.4	0	1.5	1	IPR000210(59...165)	unreviewed	BTB domain-containing protein	609	PF00651	59..164
	Denticeps clupeoides	Chordata	Craniata	Actinopteri	Clupeiformes	299321	A0A8C3Z3T4	5.3e-08	36.4	0	1.1e-07	35.4	0	1.5	1	IPR000210(53...159)	unreviewed	BTB domain-containing protein	603	PF00651	53..158
	Denticeps clupeoides	Chordata	Craniata	Actinopteri	Clupeiformes	299321	A0A8C3ZE87	4.3e-08	36.6	1.1	1.1e-07	35.3	0.3	2.1	1	IPR000210(31...138)	unreviewed	BTB domain-containing protein	591	PF00651	31..137
	Desmodus rotundus	Chordata	Craniata	Mammalia	Chiroptera	9430	K9ITJ0	5.6e-08	36.3	0	1.1e-07	35.3	0	1.5	1	IPR000210(79...185)	unreviewed	BTB domain-containing protein	629	PF00651	79..184
	Dicentrarchus labrax	Chordata	Craniata	Actinopteri		13489	A0A8P4GCY0	4.4e-08	36.6	1.1	1.1e-07	35.3	0.3	2.1	1	IPR000210(31...138)	unreviewed	BTB domain-containing protein	597	PF00651	31..137
	Dicentrarchus labrax	Chordata	Craniata	Actinopteri		13489	A0A8P4K2L4	5.3e-08	36.3	0	1.1e-07	35.4	0	1.5	1	IPR000210(59...165)	unreviewed	BTB domain-containing protein	609	PF00651	59..164
	Dicentrarchus labrax	Chordata	Craniata	Actinopteri		13489	A0A8P4K5X7	5.3e-08	36.4	0	1.1e-07	35.4	0	1.5	1	IPR000210(60...166)	unreviewed	BTB domain-containing protein	610	PF00651	60..165
	Dipodomys ordii	Chordata	Craniata	Mammalia	Rodentia	10020	A0A1S3F3N5	5.3e-08	36.3	0	1.1e-07	35.4	0	1.5	1	IPR000210(59...165)	unreviewed	BTB domain-containing protein	609	PF00651	59..164
	Dissostichus eleginoides	Chordata	Craniata	Actinopteri	Perciformes	100907	A0AAD9CBK5	4.3e-08	36.6	1.1	1.1e-07	35.3	0.3	2.1	1	IPR000210(31...138)	unreviewed	Kelch-like protein 17	597	PF00651	31..137
	Dissostichus mawsoni	Chordata	Craniata	Actinopteri	Perciformes	36200	A0A7J5ZAD1	5.3e-08	36.4	0	1.1e-07	35.4	0	1.5	1	IPR000210(57...163)	unreviewed	BTB domain-containing protein	606	PF00651	57..162
	Dromaius novaehollandiae	Chordata	Craniata	Aves	Casuariiformes	8790	A0A8C4JX06	4.3e-08	36.7	1.1	1.1e-07	35.3	0.3	2.1	1	IPR000210(30...137)	unreviewed	BTB domain-containing protein	590	PF00651	30..136
	Dromaius novaehollandiae	Chordata	Craniata	Aves	Casuariiformes	8790	A0A8C4KI05	5.3e-08	36.3	0	1.1e-07	35.4	0	1.5	1	IPR000210(59...165)	unreviewed	BTB domain-containing protein	618	PF00651	59..164
	Echeneis naucrates	Chordata	Craniata	Actinopteri	Carangiformes	173247	A0A665UAM5	4.5e-08	36.6	1.1	1.1e-07	35.3	0.3	2.1	1	IPR000210(48...155)	unreviewed	BTB domain-containing protein	605	PF00651	48..154
	Echeneis naucrates	Chordata	Craniata	Actinopteri	Carangiformes	173247	A0A665UGI7	5.3e-08	36.3	0	1.1e-07	35.4	0	1.5	1	IPR000210(59...165)	unreviewed	BTB domain-containing protein	609	PF00651	59..164
	Echeneis naucrates	Chordata	Craniata	Actinopteri	Carangiformes	173247	A0A665UHE0	5.1e-08	36.4	0	1.1e-07	35.4	0	1.5	1	IPR000210(68...174)	unreviewed	BTB domain-containing protein	611	PF00651	68..173
	Electrophorus electricus	Chordata	Craniata	Actinopteri	Gymnotiformes	8005	A0A4W4FEY9	5.3e-08	36.4	0	1.1e-07	35.4	0	1.5	1	IPR000210(66...172)	unreviewed	BTB domain-containing protein	614	PF00651	66..171
	Electrophorus voltai	Chordata	Craniata	Actinopteri	Gymnotiformes	2609070	A0AAD8YVW7	5e-08	36.4	0	1.1e-07	35.4	0	1.5	1	IPR000210(51...157)	unreviewed	Uncharacterized protein	604	PF00651	51..156
	Eleutherodactylus coqui	Chordata	Craniata	Amphibia	Anura	57060	A0A8J6F9B3	5.3e-08	36.3	0	1.1e-07	35.4	0	1.5	1	IPR000210(59...165)	unreviewed	BTB domain-containing protein	609	PF00651	59..164
	Enhydra lutris	Chordata	Craniata	Mammalia	Carnivora	391180	A0A2Y9K325	5.3e-08	36.3	0	1.1e-07	35.4	0	1.5	1	IPR000210(59...165)	unreviewed	BTB domain-containing protein	609	PF00651	59..164
	Equus asinus	Chordata	Craniata	Mammalia	Perissodactyla	9793	A0A9L0JVM3	5.3e-08	36.3	0	1.1e-07	35.4	0	1.5	1	IPR000210(59...165)	unreviewed	BTB domain-containing protein	609	PF00651	59..164
	Equus asinus	Chordata	Craniata	Mammalia	Perissodactyla	9793	A0A9L0K7I0	5.5e-08	36.3	0	1.1e-07	35.3	0	1.5	1	IPR000210(74...180)	unreviewed	BTB domain-containing protein	624	PF00651	74..179
	Equus caballus	Chordata	Craniata	Mammalia	Perissodactyla	9796	A0A9L0RH86	5.3e-08	36.3	0	1.1e-07	35.4	0	1.5	1	IPR000210(59...165)	unreviewed	BTB domain-containing protein	609	PF00651	59..164
	Equus caballus	Chordata	Craniata	Mammalia	Perissodactyla	9796	A0A9L0RW86	5.3e-08	36.4	0	1.1e-07	35.4	0	1.5	1	IPR000210(57...163)	unreviewed	BTB domain-containing protein	607	PF00651	57..162
	Equus caballus	Chordata	Craniata	Mammalia	Perissodactyla	9796	A0A9L0SA92	5.5e-08	36.3	0	1.1e-07	35.3	0	1.5	1	IPR000210(74...180)	unreviewed	BTB domain-containing protein	624	PF00651	74..179
	Erinaceus europaeus	Chordata	Craniata	Mammalia	Eulipotyphla	9365	A0A1S2ZVG8	5.3e-08	36.4	0	1.1e-07	35.4	0	1.5	1	IPR000210(59...165)	unreviewed	BTB domain-containing protein	609	PF00651	59..164
	Erpetoichthys calabaricus	Chordata	Craniata	Cladistia	Polypteriformes	27687	A0A8C4SH16	5.3e-08	36.4	0	1.1e-07	35.4	0	1.5	1	IPR000210(54...160)	unreviewed	BTB domain-containing protein	604	PF00651	54..159
	Erpetoichthys calabaricus	Chordata	Craniata	Cladistia	Polypteriformes	27687	A0A8C4SHL3	5.2e-08	36.4	0	1.1e-07	35.4	0	1.5	1	IPR000210(61...167)	unreviewed	BTB domain-containing protein	611	PF00651	61..166
	Erpetoichthys calabaricus	Chordata	Craniata	Cladistia	Polypteriformes	27687	A0A8C4XAQ0	5.3e-08	36.4	0	1.1e-07	35.4	0	1.5	1	IPR000210(55...161)	unreviewed	BTB domain-containing protein	605	PF00651	55..160
	Esox lucius	Chordata	Craniata	Actinopteri	Esociformes	8010	A0A3P8XU11	4.4e-08	36.6	1.1	1.1e-07	35.3	0.3	2	1	IPR000210(36...143)	unreviewed	BTB domain-containing protein	596	PF00651	36..142
	Esox lucius	Chordata	Craniata	Actinopteri	Esociformes	8010	A0A3P8ZRH9	4.4e-08	36.6	1.1	1.1e-07	35.3	0.3	2.1	1	IPR000210(31...138)	unreviewed	BTB domain-containing protein	591	PF00651	31..137
	Esox lucius	Chordata	Craniata	Actinopteri	Esociformes	8010	A0A3P8ZVQ6	5.3e-08	36.3	0	1.1e-07	35.4	0	1.5	1	IPR000210(59...165)	unreviewed	BTB domain-containing protein	609	PF00651	59..164
	Esox lucius	Chordata	Craniata	Actinopteri	Esociformes	8010	A0A6Q2YWI5	5.3e-08	36.4	0	1.1e-07	35.4	0	1.5	1	IPR000210(61...167)	unreviewed	BTB domain-containing protein	603	PF00651	61..166
	Esox lucius	Chordata	Craniata	Actinopteri	Esociformes	8010	A0A6Q2ZDG6	5.4e-08	36.3	0	1.1e-07	35.4	0	1.5	1	IPR000210(61...167)	unreviewed	BTB domain-containing protein	611	PF00651	61..166
	Etheostoma spectabile	Chordata	Craniata	Actinopteri	Perciformes	54343	A0A5J5DBT2	4.3e-08	36.6	1.1	1.1e-07	35.3	0.3	2.1	1	IPR000210(31...138)	unreviewed	BTB domain-containing protein	597	PF00651	31..137
	Eublepharis macularius	Chordata	Craniata	Lepidosauria	Squamata	481883	A0AA97JFI4	5.3e-08	36.3	0	1.1e-07	35.4	0	1.5	1	IPR000210(59...165)	unreviewed	BTB domain-containing protein	609	PF00651	59..164
	Eublepharis macularius	Chordata	Craniata	Lepidosauria	Squamata	481883	A0AA97KLF7	4.3e-08	36.7	1.1	1.1e-07	35.3	0.3	2.1	1	IPR000210(30...137)	unreviewed	BTB domain-containing protein	590	PF00651	30..136
	Falco tinnunculus	Chordata	Craniata	Aves	Falconiformes	100819	A0A8C4U7N3	5e-08	36.4	0	1.1e-07	35.4	0	1.5	1	IPR000210(63...169)	unreviewed	BTB domain-containing protein	612	PF00651	63..168
	Falco tinnunculus	Chordata	Craniata	Aves	Falconiformes	100819	A0A8C4UAG6	5.3e-08	36.3	0	1.1e-07	35.4	0	1.5	1	IPR000210(59...165)	unreviewed	BTB domain-containing protein	611	PF00651	59..164
	Falco tinnunculus	Chordata	Craniata	Aves	Falconiformes	100819	A0A8C4XRS5	4.3e-08	36.7	1.1	1.1e-07	35.3	0.3	2.1	1	IPR000210(30...137)	unreviewed	BTB domain-containing protein	590	PF00651	30..136
	Felis catus	Chordata	Craniata	Mammalia	Carnivora	9685	M3WID1	5.3e-08	36.3	0	1.1e-07	35.4	0	1.5	1	IPR000210(59...165)	unreviewed	BTB domain-containing protein	608	PF00651	59..164
	Ficedula albicollis	Chordata	Craniata	Aves	Passeriformes	59894	U3JZW6	5.3e-08	36.4	0	1.1e-07	35.4	0	1.5	1	IPR000210(59...165)	unreviewed	BTB domain-containing protein	618	PF00651	59..164
	Gadus morhua	Chordata	Craniata	Actinopteri	Gadiformes	8049	A0A8C4YUZ5	3.4e-08	37	1.1	1.1e-07	35.4	0.3	2.2	1	IPR000210(44...151)	unreviewed	BTB domain-containing protein	563	PF00651	44..150
	Gadus morhua	Chordata	Craniata	Actinopteri	Gadiformes	8049	A0A8C4ZJ02	5.2e-08	36.4	0	1.1e-07	35.4	0	1.5	1	IPR000210(53...159)	unreviewed	BTB domain-containing protein	603	PF00651	53..158
	Gadus morhua	Chordata	Craniata	Actinopteri	Gadiformes	8049	A0A8C5B267	5.3e-08	36.3	0	1.1e-07	35.4	0	1.5	1	IPR000210(59...165)	unreviewed	BTB domain-containing protein	609	PF00651	59..164
	Gadus morhua	Chordata	Craniata	Actinopteri	Gadiformes	8049	A0A8C5BFN3	4.4e-08	36.6	1.1	1.1e-07	35.3	0.3	2	1	IPR000210(39...146)	unreviewed	BTB domain-containing protein	596	PF00651	39..145
	Gadus morhua	Chordata	Craniata	Actinopteri	Gadiformes	8049	A0A8C5BLT7	5.3e-08	36.4	0	1.1e-07	35.4	0	1.5	1	IPR000210(56...162)	unreviewed	BTB domain-containing protein	606	PF00651	56..161
	Gadus morhua	Chordata	Craniata	Actinopteri	Gadiformes	8049	A0A8C5BQ96	4.3e-08	36.7	1.1	1.1e-07	35.3	0.3	2.1	1	IPR000210(39...146)	unreviewed	BTB domain-containing protein	584	PF00651	39..145
	Gadus morhua	Chordata	Craniata	Actinopteri	Gadiformes	8049	A0A8C5CHV4	5.3e-08	36.4	0	1.1e-07	35.4	0	1.5	1	IPR000210(56...162)	unreviewed	BTB domain-containing protein	606	PF00651	56..161
	Gallus gallus	Chordata	Craniata	Aves	Galliformes	9031	A0A1D5P2A9	5.3e-08	36.3	0	1.1e-07	35.4	0	1.5	1	IPR000210(59...165)	unreviewed	Kelch like family member 20	609	PF00651	59..164
	Gallus gallus	Chordata	Craniata	Aves	Galliformes	9031	A0A1D5PY38	5.3e-08	36.3	0	1.1e-07	35.4	0	1.5	1	IPR000210(59...165)	unreviewed	Kelch like family member 20	613	PF00651	59..164
	Gallus gallus	Chordata	Craniata	Aves	Galliformes	9031	A0A8V0Y1K9	5.6e-08	36.3	0	1.1e-07	35.3	0	1.5	1	IPR000210(86...192)	unreviewed	BTB domain-containing protein	636	PF00651	86..191
	Gallus gallus	Chordata	Craniata	Aves	Galliformes	9031	A0A8V0ZJZ5	4.3e-08	36.7	1.1	1.1e-07	35.3	0.3	2.1	1	IPR000210(30...137)	unreviewed	BTB domain-containing protein	589	PF00651	30..136
	Gallus gallus	Chordata	Craniata	Aves	Galliformes	9031	F1NVA2	4.3e-08	36.7	1.1	1.1e-07	35.3	0.3	2.1	1	IPR000210(30...137)	unreviewed	Kelch like family member 17	590	PF00651	30..136
	Gallus gallus	Chordata	Craniata	Aves	Galliformes	9031	Q5ZKD9	5.4e-08	36.3	0	1.1e-07	35.4	0	1.5	1	IPR000210(59...165)	reviewed	Kelch-like protein 20	610	PF00651	59..164
	Gasterosteus aculeatus	Chordata	Craniata	Actinopteri	Perciformes	69293	G3PQ87	5.3e-08	36.3	0	1.1e-07	35.4	0	1.5	1	IPR000210(60...166)	unreviewed	BTB domain-containing protein	610	PF00651	60..165
	Geospiza fortis	Chordata	Craniata	Aves	Passeriformes	48883	A0A6I9HQ55	4.3e-08	36.6	1.1	1.1e-07	35.3	0.3	2.1	1	IPR000210(30...137)	unreviewed	BTB domain-containing protein	590	PF00651	30..136
	Geospiza fortis	Chordata	Craniata	Aves	Passeriformes	48883	A0A6I9HW02	5.3e-08	36.3	0	1.1e-07	35.4	0	1.5	1	IPR000210(59...165)	unreviewed	BTB domain-containing protein	609	PF00651	59..164
	Geospiza fortis	Chordata	Craniata	Aves	Passeriformes	48883	A0A8N5F0H0	5.3e-08	36.4	0	1.1e-07	35.4	0	1.5	1	IPR000210(59...165)	unreviewed	BTB domain-containing protein	618	PF00651	59..164
	Geospiza fortis	Chordata	Craniata	Aves	Passeriformes	48883	A0A8N5F2J4	5.3e-08	36.4	0	1.1e-07	35.4	0	1.5	1	IPR000210(62...168)	unreviewed	BTB domain-containing protein	621	PF00651	62..167
	Geotrypetes seraphini	Chordata	Craniata	Amphibia	Gymnophiona	260995	A0A6P8N6Z5	5.3e-08	36.3	0	1.1e-07	35.4	0	1.5	1	IPR000210(59...165)	unreviewed	BTB domain-containing protein	609	PF00651	59..164
	Geotrypetes seraphini	Chordata	Craniata	Amphibia	Gymnophiona	260995	A0A6P8PUD5	4.4e-08	36.6	1.1	1.1e-07	35.3	0.3	2.1	1	IPR000210(30...137)	unreviewed	BTB domain-containing protein	590	PF00651	30..136
	Gopherus agassizii	Chordata	Craniata		Testudines	38772	A0A452HJX2	4.3e-08	36.6	1.1	1.1e-07	35.3	0.3	2.1	1	IPR000210(30...137)	unreviewed	BTB domain-containing protein	590	PF00651	30..136
	Gopherus agassizii	Chordata	Craniata		Testudines	38772	A0A452IBF1	5.2e-08	36.4	0	1.1e-07	35.4	0	1.5	1	IPR000210(63...169)	unreviewed	BTB domain-containing protein	613	PF00651	63..168
	Gopherus evgoodei	Chordata	Craniata		Testudines	1825980	A0A8C4WHX6	4.4e-08	36.6	1.1	1.1e-07	35.3	0.3	2.1	1	IPR000210(34...141)	unreviewed	BTB domain-containing protein	594	PF00651	34..140
	Gopherus evgoodei	Chordata	Craniata		Testudines	1825980	A0A8C4WLK0	5.3e-08	36.3	0	1.1e-07	35.4	0	1.5	1	IPR000210(59...165)	unreviewed	BTB domain-containing protein	608	PF00651	59..164
	Gorilla gorilla	Chordata	Craniata	Mammalia	Primates	9595	G3RXB8	5.3e-08	36.3	0	1.1e-07	35.4	0	1.5	1	IPR000210(59...165)	unreviewed	BTB domain-containing protein	609	PF00651	59..164
	Gouania willdenowi	Chordata	Craniata	Actinopteri	Blenniiformes	441366	A0A8C5I2A1	5.3e-08	36.4	0	1.1e-07	35.4	0	1.5	1	IPR000210(53...159)	unreviewed	BTB domain-containing protein	603	PF00651	53..158
	Gouania willdenowi	Chordata	Craniata	Actinopteri	Blenniiformes	441366	A0A8C5I3Z6	4.3e-08	36.6	1.1	1.1e-07	35.3	0.3	2.1	1	IPR000210(31...138)	unreviewed	BTB domain-containing protein	591	PF00651	31..137
	Gouania willdenowi	Chordata	Craniata	Actinopteri	Blenniiformes	441366	A0A8C5NGC1	5.3e-08	36.3	0	1.1e-07	35.4	0	1.5	1	IPR000210(59...165)	unreviewed	BTB domain-containing protein	609	PF00651	59..164
	Gymnodraco acuticeps	Chordata	Craniata	Actinopteri	Perciformes	8218	A0A6P8SN38	5.3e-08	36.3	0	1.1e-07	35.4	0	1.5	1	IPR000210(59...165)	unreviewed	BTB domain-containing protein	609	PF00651	59..164
	Gymnodraco acuticeps	Chordata	Craniata	Actinopteri	Perciformes	8218	A0A6P8SNB7	5.5e-08	36.3	0	1.1e-07	35.3	0	1.5	1	IPR000210(77...183)	unreviewed	BTB domain-containing protein	627	PF00651	77..182
	Gymnodraco acuticeps	Chordata	Craniata	Actinopteri	Perciformes	8218	A0A6P8TMI5	4.3e-08	36.6	1.1	1.1e-07	35.3	0.3	2.1	1	IPR000210(31...138)	unreviewed	BTB domain-containing protein	597	PF00651	31..137
	Gymnodraco acuticeps	Chordata	Craniata	Actinopteri	Perciformes	8218	A0A6P8U2Z5	4.5e-08	36.6	1.1	1.1e-07	35.3	0.3	2.1	1	IPR000210(46...153)	unreviewed	BTB domain-containing protein	606	PF00651	46..152
	Haplochromis burtoni	Chordata	Craniata	Actinopteri	Cichliformes	8153	A0A3Q2W1W9	4.3e-08	36.6	1.1	1.1e-07	35.3	0.3	2.1	1	IPR000210(31...138)	unreviewed	BTB domain-containing protein	591	PF00651	31..137
	Heterocephalus glaber	Chordata	Craniata	Mammalia	Rodentia	10181	A0A0P6JD30	5.3e-08	36.3	0	1.1e-07	35.4	0	1.5	1	IPR000210(59...165)	unreviewed	BTB domain-containing protein	609	PF00651	59..164
	Hippocampus comes	Chordata	Craniata	Actinopteri	Syngnathiformes	109280	A0A3Q2XJY3	4.3e-08	36.6	1.1	1.1e-07	35.3	0.3	2.1	1	IPR000210(31...138)	unreviewed	BTB domain-containing protein	591	PF00651	31..137
	Hippocampus comes	Chordata	Craniata	Actinopteri	Syngnathiformes	109280	A0A3Q2Y1B5	5.3e-08	36.3	0	1.1e-07	35.4	0	1.5	1	IPR000210(57...163)	unreviewed	BTB domain-containing protein	607	PF00651	57..162
	Hippocampus comes	Chordata	Craniata	Actinopteri	Syngnathiformes	109280	A0A3Q3DF99	5.3e-08	36.3	0	1.1e-07	35.4	0	1.5	1	IPR000210(59...165)	unreviewed	BTB domain-containing protein	609	PF00651	59..164
	Hipposideros armiger	Chordata	Craniata	Mammalia	Chiroptera	186990	A0A8B7RRJ2	5.3e-08	36.3	0	1.1e-07	35.4	0	1.5	1	IPR000210(59...165)	unreviewed	BTB domain-containing protein	609	PF00651	59..164
	Hipposideros armiger	Chordata	Craniata	Mammalia	Chiroptera	186990	A0A8B7SUS9	5.1e-08	36.4	0	1.1e-07	35.3	0	1.5	1	IPR000210(54...161)	unreviewed	Kelch-like protein 3	501	PF00651	54..160
	Homo sapiens	Chordata	Craniata	Mammalia	Primates	9606	Q9Y2M5	5.3e-08	36.3	0	1.1e-07	35.4	0	1.5	1	IPR000210(59...165)	reviewed	Kelch-like protein 20	609	PF00651	59..164
	Hucho hucho	Chordata	Craniata	Actinopteri	Salmoniformes	62062	A0A4W5KVY7	5.3e-08	36.3	0	1.1e-07	35.4	0	1.5	1	IPR000210(59...165)	unreviewed	BTB domain-containing protein	609	PF00651	59..164
	Hucho hucho	Chordata	Craniata	Actinopteri	Salmoniformes	62062	A0A4W5PB86	4.3e-08	36.6	1.1	1.1e-07	35.3	0.3	2.1	1	IPR000210(31...138)	unreviewed	BTB domain-containing protein	591	PF00651	31..137
	Hucho hucho	Chordata	Craniata	Actinopteri	Salmoniformes	62062	A0A4W5QBI4	5.3e-08	36.3	0	1.1e-07	35.4	0	1.5	1	IPR000210(58...164)	unreviewed	BTB domain-containing protein	608	PF00651	58..163
	Hucho hucho	Chordata	Craniata	Actinopteri	Salmoniformes	62062	A0A4W5QLI4	5.4e-08	36.3	0	1.1e-07	35.4	0	1.5	1	IPR000210(65...171)	unreviewed	BTB domain-containing protein	615	PF00651	65..170
	Hypotaenidia okinawae	Chordata	Craniata	Aves	Gruiformes	2861861	A0A6G1RBB9	5.3e-08	36.3	0	1.1e-07	35.4	0	1.5	1	IPR000210(59...165)	unreviewed	BTB domain-containing protein	609	PF00651	59..164
	Iconisemion striatum	Chordata	Craniata	Actinopteri	Cyprinodontiformes	60296	A0A1A7WK76	4.3e-08	36.6	1.1	1.1e-07	35.3	0.3	2.1	1	IPR000210(31...138)	unreviewed	BTB domain-containing protein	591	PF00651	31..137
	Iconisemion striatum	Chordata	Craniata	Actinopteri	Cyprinodontiformes	60296	A0A1A7YYL4	5.3e-08	36.4	0	1.1e-07	35.4	0	1.5	1	IPR000210(54...160)	unreviewed	BTB domain-containing protein	604	PF00651	54..159
	Ictalurus punctatus	Chordata	Craniata	Actinopteri	Siluriformes	7998	A0A2D0SK63	4e-08	36.7	1.1	1.1e-07	35.3	0.3	2.1	1	IPR000210(31...138)	unreviewed	BTB domain-containing protein	591	PF00651	31..137
	Ictidomys tridecemlineatus	Chordata	Craniata	Mammalia	Rodentia	43179	I3MPF4	5.3e-08	36.3	0	1.1e-07	35.4	0	1.5	1	IPR000210(59...165)	unreviewed	BTB domain-containing protein	609	PF00651	59..164
	Junco hyemalis	Chordata	Craniata	Aves	Passeriformes	40217	A0A8C5J4L1	5.3e-08	36.4	0	1.1e-07	35.4	0	1.5	1	IPR000210(59...165)	unreviewed	BTB domain-containing protein	618	PF00651	59..164
	Kryptolebias marmoratus	Chordata	Craniata	Actinopteri	Cyprinodontiformes	37003	A0A3Q3B051	4.3e-08	36.6	1.1	1.1e-07	35.3	0.3	2.1	1	IPR000210(31...138)	unreviewed	BTB domain-containing protein	591	PF00651	31..137
	Kryptolebias marmoratus	Chordata	Craniata	Actinopteri	Cyprinodontiformes	37003	A0A3Q3H150	5.3e-08	36.4	0	1.1e-07	35.4	0	1.5	1	IPR000210(54...160)	unreviewed	BTB domain-containing protein	604	PF00651	54..159
	Labrus bergylta	Chordata	Craniata	Actinopteri	Labriformes	56723	A0A3Q3G4S4	5.3e-08	36.3	0	1.1e-07	35.4	0	1.5	1	IPR000210(59...165)	unreviewed	BTB domain-containing protein	609	PF00651	59..164
	Labrus bergylta	Chordata	Craniata	Actinopteri	Labriformes	56723	A0A3Q3MXP4	5.4e-08	36.3	0	1.1e-07	35.4	0	1.5	1	IPR000210(59...165)	unreviewed	BTB domain-containing protein	614	PF00651	59..164
	Labrus bergylta	Chordata	Craniata	Actinopteri	Labriformes	56723	A0A3Q3N1F6	4.3e-08	36.6	1.1	1.1e-07	35.3	0.3	2.1	1	IPR000210(31...138)	unreviewed	BTB domain-containing protein	591	PF00651	31..137
	Larimichthys crocea	Chordata	Craniata	Actinopteri		215358	A0A6G0IPI6	4.3e-08	36.6	1.1	1.1e-07	35.3	0.3	2.1	1	IPR000210(31...138)	unreviewed	BTB domain-containing protein	591	PF00651	31..137
	Lates calcarifer	Chordata	Craniata	Actinopteri		8187	A0A4W6CG97	4.3e-08	36.6	1.1	1.1e-07	35.3	0.3	2.1	1	IPR000210(31...138)	unreviewed	BTB domain-containing protein	591	PF00651	31..137
	Lates calcarifer	Chordata	Craniata	Actinopteri		8187	A0A4W6CX19	5.3e-08	36.4	0	1.1e-07	35.4	0	1.5	1	IPR000210(56...162)	unreviewed	BTB domain-containing protein	606	PF00651	56..161
	Lates calcarifer	Chordata	Craniata	Actinopteri		8187	A0A4W6CXN5	5.3e-08	36.3	0	1.1e-07	35.4	0	1.5	1	IPR000210(59...165)	unreviewed	BTB domain-containing protein	609	PF00651	59..164
	Laticauda laticaudata	Chordata	Craniata	Lepidosauria	Squamata	8630	A0A8C5RPT9	5.3e-08	36.3	0	1.1e-07	35.4	0	1.5	1	IPR000210(59...165)	unreviewed	BTB domain-containing protein	609	PF00651	59..164
	Laticauda laticaudata	Chordata	Craniata	Lepidosauria	Squamata	8630	A0A8C5SCE6	4.1e-08	36.7	1.1	1.1e-07	35.3	0.3	2.1	1	IPR000210(69...176)	unreviewed	BTB domain-containing protein	588	PF00651	69..175
	Latimeria chalumnae	Chordata	Craniata		Coelacanthiformes	7897	H3APG9	5.3e-08	36.3	0	1.1e-07	35.4	0	1.5	1	IPR000210(59...165)	unreviewed	BTB domain-containing protein	609	PF00651	59..164
	Latimeria chalumnae	Chordata	Craniata		Coelacanthiformes	7897	H3BDM1	4.3e-08	36.6	1.1	1.1e-07	35.3	0.3	2.1	1	IPR000210(33...140)	unreviewed	BTB domain-containing protein	593	PF00651	33..139
	Lepidothrix coronata	Chordata	Craniata	Aves	Passeriformes	321398	A0A6J0HA60	5.3e-08	36.3	0	1.1e-07	35.4	0	1.5	1	IPR000210(59...165)	unreviewed	BTB domain-containing protein	609	PF00651	59..164
	Lepidothrix coronata	Chordata	Craniata	Aves	Passeriformes	321398	A0A6J0HB44	5.3e-08	36.4	0	1.1e-07	35.4	0	1.5	1	IPR000210(62...168)	unreviewed	BTB domain-containing protein	621	PF00651	62..167
	Lepidothrix coronata	Chordata	Craniata	Aves	Passeriformes	321398	A0A6J0HB81	5.3e-08	36.4	0	1.1e-07	35.4	0	1.5	1	IPR000210(59...165)	unreviewed	BTB domain-containing protein	618	PF00651	59..164
	Lepidothrix coronata	Chordata	Craniata	Aves	Passeriformes	321398	A0A6J0I403	4.3e-08	36.7	1.1	1.1e-07	35.3	0.3	2.1	1	IPR000210(30...137)	unreviewed	BTB domain-containing protein	590	PF00651	30..136
	Lepisosteus oculatus	Chordata	Craniata	Actinopteri	Semionotiformes	7918	W5MS45	5.3e-08	36.3	0	1.1e-07	35.4	0	1.5	1	IPR000210(60...166)	unreviewed	BTB domain-containing protein	610	PF00651	60..165
	Lepisosteus oculatus	Chordata	Craniata	Actinopteri	Semionotiformes	7918	W5MS53	5.3e-08	36.4	0	1.1e-07	35.4	0	1.5	1	IPR000210(59...165)	unreviewed	BTB domain-containing protein	609	PF00651	59..164
	Leptobrachium leishanense	Chordata	Craniata	Amphibia	Anura	445787	A0A8C5R8C1	5.5e-08	36.3	0	1.1e-07	35.3	0	1.5	1	IPR000210(59...165)	unreviewed	BTB domain-containing protein	631	PF00651	59..164
	Leptobrachium leishanense	Chordata	Craniata	Amphibia	Anura	445787	A0A8C5R8E4	5.3e-08	36.3	0	1.1e-07	35.4	0	1.5	1	IPR000210(62...168)	unreviewed	BTB domain-containing protein	612	PF00651	62..167
	Leptobrachium leishanense	Chordata	Craniata	Amphibia	Anura	445787	A0A8C5R8F0	5.3e-08	36.3	0	1.1e-07	35.4	0	1.5	1	IPR000210(59...165)	unreviewed	BTB domain-containing protein	609	PF00651	59..164
	Leptobrachium leishanense	Chordata	Craniata	Amphibia	Anura	445787	A0A8C5R8N0	5.5e-08	36.3	0	1.1e-07	35.3	0	1.5	1	IPR000210(84...190)	unreviewed	BTB domain-containing protein	634	PF00651	84..189
	Leptobrachium leishanense	Chordata	Craniata	Amphibia	Anura	445787	A0A8C5R9D1	5.5e-08	36.3	0	1.1e-07	35.3	0	1.5	1	IPR000210(58...164)	unreviewed	BTB domain-containing protein	630	PF00651	58..163
	Leptobrachium leishanense	Chordata	Craniata	Amphibia	Anura	445787	A0A8C5RB28	5.3e-08	36.4	0	1.1e-07	35.4	0	1.5	1	IPR000210(53...159)	unreviewed	BTB domain-containing protein	603	PF00651	53..158
	Liparis tanakae	Chordata	Craniata	Actinopteri	Perciformes	230148	A0A4Z2EJF6	5.4e-08	36.3	1.3	1.1e-07	35.3	0.7	1.9	1	IPR000210(20...79)	unreviewed	BTB domain-containing protein	160	PF00651	20..79
	Liparis tanakae	Chordata	Craniata	Actinopteri	Perciformes	230148	A0A4Z2JC99	4.3e-08	36.7	1.1	1.1e-07	35.3	0.3	2.1	1	IPR000210(31...138)	unreviewed	BTB domain-containing protein	591	PF00651	31..137
	Lipotes vexillifer	Chordata	Craniata	Mammalia	Artiodactyla	118797	A0A340YFH9	5.3e-08	36.3	0	1.1e-07	35.4	0	1.5	1	IPR000210(59...165)	unreviewed	BTB domain-containing protein	609	PF00651	59..164
	Lonchura striata	Chordata	Craniata	Aves	Passeriformes	299123	A0A218V4I4	5.3e-08	36.3	0	1.1e-07	35.4	0	1.5	1	IPR000210(59...165)	unreviewed	BTB domain-containing protein	609	PF00651	59..164
	Loxodonta africana	Chordata	Craniata	Mammalia	Proboscidea	9785	G3THE0	5.5e-08	36.3	0	1.1e-07	35.3	0	1.5	1	IPR000210(77...183)	unreviewed	BTB domain-containing protein	627	PF00651	77..182
	Lynx canadensis	Chordata	Craniata	Mammalia	Carnivora	61383	A0A667IAT8	5.3e-08	36.3	0	1.1e-07	35.4	0	1.5	1	IPR000210(59...165)	unreviewed	BTB domain-containing protein	609	PF00651	59..164
	Lynx canadensis	Chordata	Craniata	Mammalia	Carnivora	61383	A0A667IUV9	5.3e-08	36.4	0	1.1e-07	35.4	0	1.5	1	IPR000210(54...160)	unreviewed	BTB domain-containing protein	604	PF00651	54..159
	Lynx pardinus	Chordata	Craniata	Mammalia	Carnivora	191816	A0A485NB28	4.6e-08	36.5	0.2	1.1e-07	35.4	0.2	1.6	1	IPR000210(53...160)	unreviewed	BTB domain-containing protein	393	PF00651	53..159
	Lynx pardinus	Chordata	Craniata	Mammalia	Carnivora	191816	A0A485PSH6	5.3e-08	36.3	0	1.1e-07	35.4	0	1.5	1	IPR000210(59...165)	unreviewed	BTB domain-containing protein	609	PF00651	59..164
	Macaca fascicularis	Chordata	Craniata	Mammalia	Primates	9541	A0A2K5TQ44	5.5e-08	36.3	0	1.1e-07	35.3	0	1.5	1	IPR000210(84...190)	unreviewed	BTB domain-containing protein	634	PF00651	84..189
	Macaca fascicularis	Chordata	Craniata	Mammalia	Primates	9541	A0A8J8YDZ5	5.3e-08	36.3	0	1.1e-07	35.4	0	1.5	1	IPR000210(59...165)	unreviewed	BTB domain-containing protein	609	PF00651	59..164
	Macaca fascicularis	Chordata	Craniata	Mammalia	Primates	9541	G7NVI1	5.3e-08	36.3	0	1.1e-07	35.4	0	1.5	1	IPR000210(59...165)	unreviewed	BTB domain-containing protein	609	PF00651	59..164
	Macaca mulatta	Chordata	Craniata	Mammalia	Primates	9544	A0A5K1U510	5.3e-08	36.4	0	1.1e-07	35.4	0	1.5	1	IPR000210(59...165)	unreviewed	BTB domain-containing protein	607	PF00651	59..164
	Macaca mulatta	Chordata	Craniata	Mammalia	Primates	9544	A0A8J8XZF8	5.3e-08	36.3	0	1.1e-07	35.4	0	1.5	1	IPR000210(59...165)	unreviewed	BTB domain-containing protein	609	PF00651	59..164
	Macaca mulatta	Chordata	Craniata	Mammalia	Primates	9544	G7MFD2	5.3e-08	36.3	0	1.1e-07	35.4	0	1.5	1	IPR000210(59...165)	unreviewed	BTB domain-containing protein	609	PF00651	59..164
	Macaca nemestrina	Chordata	Craniata	Mammalia	Primates	9545	A0A2K6DZA0	5.3e-08	36.3	0	1.1e-07	35.4	0	1.5	1	IPR000210(59...165)	unreviewed	BTB domain-containing protein	609	PF00651	59..164
	Malurus cyaneus	Chordata	Craniata	Aves	Passeriformes	2593467	A0A8C5UBF1	5.2e-08	36.4	0	1.1e-07	35.4	0	1.5	1	IPR000210(62...168)	unreviewed	BTB domain-containing protein	612	PF00651	62..167
	Mandrillus leucophaeus	Chordata	Craniata	Mammalia	Primates	9568	A0A2K5XEY3	5.3e-08	36.3	0	1.1e-07	35.4	0	1.5	1	IPR000210(59...165)	unreviewed	BTB domain-containing protein	609	PF00651	59..164
	Marmota marmota	Chordata	Craniata	Mammalia	Rodentia	9994	A0A8C5ZUH6	5.3e-08	36.4	0	1.1e-07	35.4	0	1.5	1	IPR000210(54...160)	unreviewed	BTB domain-containing protein	604	PF00651	54..159
	Mastacembelus armatus	Chordata	Craniata	Actinopteri	Synbranchiformes	205130	A0A3Q3S091	4.4e-08	36.6	1.1	1.1e-07	35.3	0.3	2.1	1	IPR000210(31...138)	unreviewed	BTB domain-containing protein	591	PF00651	31..137
	Mastacembelus armatus	Chordata	Craniata	Actinopteri	Synbranchiformes	205130	A0A7N8Y3H2	4.2e-08	36.7	1.1	1.1e-07	35.3	0.3	2.1	1	IPR000210(48...155)	unreviewed	BTB domain-containing protein	587	PF00651	48..154
	Mastacembelus armatus	Chordata	Craniata	Actinopteri	Synbranchiformes	205130	A0A7N8YHQ7	5.3e-08	36.3	0	1.1e-07	35.4	0	1.5	1	IPR000210(59...165)	unreviewed	BTB domain-containing protein	609	PF00651	59..164
	Maylandia zebra	Chordata	Craniata	Actinopteri	Cichliformes	106582	A0A3P9C679	4.3e-08	36.6	1.1	1.1e-07	35.3	0.3	2.1	1	IPR000210(31...138)	unreviewed	BTB domain-containing protein	591	PF00651	31..137
	Maylandia zebra	Chordata	Craniata	Actinopteri	Cichliformes	106582	A0A3P9CBP8	5.3e-08	36.3	0	1.1e-07	35.4	0	1.5	1	IPR000210(59...165)	unreviewed	BTB domain-containing protein	609	PF00651	59..164
	Meleagris gallopavo	Chordata	Craniata	Aves	Galliformes	9103	G1MWM7	5.3e-08	36.3	0	1.1e-07	35.4	0	1.5	1	IPR000210(59...165)	unreviewed	BTB domain-containing protein	618	PF00651	59..164
	Meleagris gallopavo	Chordata	Craniata	Aves	Galliformes	9103	G1MWQ5	4.3e-08	36.7	1.1	1.1e-07	35.3	0.3	2.1	1	IPR000210(30...137)	unreviewed	BTB domain-containing protein	590	PF00651	30..136
	Meleagris gallopavo	Chordata	Craniata	Aves	Galliformes	9103	G3US41	5.3e-08	36.3	0	1.1e-07	35.4	0	1.5	1	IPR000210(59...165)	unreviewed	BTB domain-containing protein	608	PF00651	59..164
	Menidia menidia	Chordata	Craniata	Actinopteri	Atheriniformes	238744	A0A8S4AX09	5.3e-08	36.3	0	1.1e-07	35.4	0	1.5	1	IPR000210(59...165)	unreviewed	BTB domain-containing protein	609	PF00651	59..164
	Menidia menidia	Chordata	Craniata	Actinopteri	Atheriniformes	238744	A0A8S4B3K5	5.5e-08	36.3	0	1.1e-07	35.4	0	1.5	1	IPR000210(59...165)	unreviewed	BTB domain-containing protein	620	PF00651	59..164
	Menidia menidia	Chordata	Craniata	Actinopteri	Atheriniformes	238744	A0A8S4BSZ1	4.4e-08	36.6	1.1	1.1e-07	35.3	0.3	2.1	1	IPR000210(31...138)	unreviewed	BTB domain-containing protein	597	PF00651	31..137
	Mesocricetus auratus	Chordata	Craniata	Mammalia	Rodentia	10036	A0A1U7QR99	5.3e-08	36.3	0	1.1e-07	35.4	0	1.5	1	IPR000210(59...165)	unreviewed	BTB domain-containing protein	609	PF00651	59..164
	Microcaecilia unicolor	Chordata	Craniata	Amphibia	Gymnophiona	1415580	A0A6P7YJH8	5.3e-08	36.3	0	1.1e-07	35.4	0	1.5	1	IPR000210(59...165)	unreviewed	BTB domain-containing protein	609	PF00651	59..164
	Microcaecilia unicolor	Chordata	Craniata	Amphibia	Gymnophiona	1415580	A0A6P7ZGB6	4.3e-08	36.6	1.1	1.1e-07	35.3	0.3	2.1	1	IPR000210(30...137)	unreviewed	BTB domain-containing protein	590	PF00651	30..136
	Microcebus murinus	Chordata	Craniata	Mammalia	Primates	30608	A0A8B7GE01	5.3e-08	36.3	0	1.1e-07	35.4	0	1.5	1	IPR000210(59...165)	unreviewed	BTB domain-containing protein	609	PF00651	59..164
	Microcebus murinus	Chordata	Craniata	Mammalia	Primates	30608	A0A8C5URT4	5.3e-08	36.4	0	1.1e-07	35.4	0	1.5	1	IPR000210(59...165)	unreviewed	BTB domain-containing protein	608	PF00651	59..164
	Micrurus lemniscatus	Chordata	Craniata	Lepidosauria	Squamata	129467	A0A2D4HIK2	5.3e-08	36.3	0	1.1e-07	35.4	0	1.5	1	IPR000210(59...165)	unreviewed	BTB domain-containing protein	609	PF00651	59..164
	Mola mola	Chordata	Craniata	Actinopteri	Tetraodontiformes	94237	A0A3Q3W663	4.2e-08	36.7	1.1	1.1e-07	35.3	0.3	2.1	1	IPR000210(60...167)	unreviewed	BTB domain-containing protein	586	PF00651	60..166
	Molossus molossus	Chordata	Craniata	Mammalia	Chiroptera	27622	A0A7J8CRH5	5.3e-08	36.3	0	1.1e-07	35.4	0	1.5	1	IPR000210(59...165)	unreviewed	BTB domain-containing protein	609	PF00651	59..164
	Monodelphis domestica	Chordata	Craniata	Mammalia	Didelphimorphia	13616	A0A5F8G4N8	5.6e-08	36.3	0	1.1e-07	35.3	0	1.5	1	IPR000210(83...189)	unreviewed	BTB domain-containing protein	633	PF00651	83..188
	Monodelphis domestica	Chordata	Craniata	Mammalia	Didelphimorphia	13616	F6UVL8	5.3e-08	36.3	0	1.1e-07	35.4	0	1.5	1	IPR000210(59...165)	unreviewed	BTB domain-containing protein	612	PF00651	59..164
	Monodon monoceros	Chordata	Craniata	Mammalia	Artiodactyla	40151	A0A8C6AEK2	5.3e-08	36.3	0	1.1e-07	35.4	0	1.5	1	IPR000210(59...165)	unreviewed	BTB domain-containing protein	609	PF00651	59..164
	Monopterus albus	Chordata	Craniata	Actinopteri	Synbranchiformes	43700	A0A3Q3K9S1	4e-08	36.7	1.1	1.1e-07	35.4	0.3	2.1	1	IPR000210(45...152)	unreviewed	BTB domain-containing protein	577	PF00651	45..151
	Moschus moschiferus	Chordata	Craniata	Mammalia	Artiodactyla	68415	A0A8C6FVV5	5.3e-08	36.3	0	1.1e-07	35.4	0	1.5	1	IPR000210(59...165)	unreviewed	BTB domain-containing protein	609	PF00651	59..164
	Muraenolepis orangiensis	Chordata	Craniata	Actinopteri	Gadiformes	630683	A0A9Q0DW44	5.3e-08	36.3	0	1.1e-07	35.4	0	1.5	1	IPR000210(59...165)	unreviewed	BTB domain-containing protein	609	PF00651	59..164
	Mus caroli	Chordata	Craniata	Mammalia	Rodentia	10089	A0A6P5PHA6	5.3e-08	36.4	0	1.1e-07	35.4	0	1.5	1	IPR000210(54...160)	unreviewed	BTB domain-containing protein	604	PF00651	54..159
	Mus musculus	Chordata	Craniata	Mammalia	Rodentia	10090	Q8VCK5	5.3e-08	36.4	0	1.1e-07	35.4	0	1.5	1	IPR000210(54...160)	reviewed	Kelch-like protein 20	604	PF00651	54..159
	Mus spicilegus	Chordata	Craniata	Mammalia	Rodentia	10103	A0A8C6MZC6	5.3e-08	36.4	0	1.1e-07	35.4	0	1.5	1	IPR000210(54...160)	unreviewed	BTB domain-containing protein	604	PF00651	54..159
	Mustela putorius	Chordata	Craniata	Mammalia	Carnivora	9669	M3Y007	5.3e-08	36.3	0	1.1e-07	35.4	0	1.5	1	IPR000210(59...165)	unreviewed	BTB domain-containing protein	609	PF00651	59..164
	Myotis brandtii	Chordata	Craniata	Mammalia	Chiroptera	109478	S7MVX6	5.5e-08	36.3	0	1.1e-07	35.3	0	1.5	1	IPR000210(79...185)	unreviewed	BTB domain-containing protein	629	PF00651	79..184
	Myotis davidii	Chordata	Craniata	Mammalia	Chiroptera	225400	L5LNX9	5.5e-08	36.3	0	1.1e-07	35.3	0	1.5	1	IPR000210(79...185)	unreviewed	BTB domain-containing protein	629	PF00651	79..184
	Myotis lucifugus	Chordata	Craniata	Mammalia	Chiroptera	59463	G1PH73	5.2e-08	36.4	0	1.1e-07	35.4	0	1.5	1	IPR000210(61...167)	unreviewed	BTB domain-containing protein	611	PF00651	61..166
	Myotis myotis	Chordata	Craniata	Mammalia	Chiroptera	51298	A0A7J7SR80	5.6e-08	36.3	0	1.1e-07	35.3	0	1.5	1	IPR000210(89...195)	unreviewed	BTB domain-containing protein	639	PF00651	89..194
	Myotis myotis	Chordata	Craniata	Mammalia	Chiroptera	51298	A0A7J7SRH6	5.3e-08	36.3	0	1.1e-07	35.4	0	1.5	1	IPR000210(59...165)	unreviewed	BTB domain-containing protein	609	PF00651	59..164
	Myripristis murdjan	Chordata	Craniata	Actinopteri	Holocentriformes	586833	A0A667WBN4	3.8e-08	36.8	1.1	1.1e-07	35.4	0.3	2.1	1	IPR000210(31...138)	unreviewed	BTB domain-containing protein	577	PF00651	31..137
	Myripristis murdjan	Chordata	Craniata	Actinopteri	Holocentriformes	586833	A0A667WK49	4.1e-08	36.7	1.1	1.1e-07	35.4	0.3	2.1	1	IPR000210(31...138)	unreviewed	BTB domain-containing protein	578	PF00651	31..137
	Myripristis murdjan	Chordata	Craniata	Actinopteri	Holocentriformes	586833	A0A667WK67	4.3e-08	36.6	1.1	1.1e-07	35.3	0.3	2.1	1	IPR000210(31...138)	unreviewed	BTB domain-containing protein	591	PF00651	31..137
	Myripristis murdjan	Chordata	Craniata	Actinopteri	Holocentriformes	586833	A0A667XH92	5.3e-08	36.3	0	1.1e-07	35.4	0	1.5	1	IPR000210(59...165)	unreviewed	BTB domain-containing protein	609	PF00651	59..164
	Myripristis murdjan	Chordata	Craniata	Actinopteri	Holocentriformes	586833	A0A667XHA1	5.3e-08	36.3	0	1.1e-07	35.4	0	1.5	1	IPR000210(63...169)	unreviewed	BTB domain-containing protein	612	PF00651	63..168
	Naja naja	Chordata	Craniata	Lepidosauria	Squamata	35670	A0A8C6VDI9	5.7e-08	36.3	0	1.1e-07	35.3	0	1.5	1	IPR000210(59...165)	unreviewed	BTB domain-containing protein	649	PF00651	59..164
	Neogobius melanostomus	Chordata	Craniata	Actinopteri	Gobiiformes	47308	A0A8C6UCR9	4.3e-08	36.6	1.1	1.1e-07	35.3	0.3	2.1	1	IPR000210(31...138)	unreviewed	BTB domain-containing protein	591	PF00651	31..137
	Neolamprologus brichardi	Chordata	Craniata	Actinopteri	Cichliformes	32507	A0A3Q4MGA8	4.4e-08	36.6	1.1	1.1e-07	35.3	0.3	2.1	1	IPR000210(40...147)	unreviewed	BTB domain-containing protein	600	PF00651	40..146
	Neomonachus schauinslandi	Chordata	Craniata	Mammalia	Carnivora	29088	A0A2Y9GGQ9	5.3e-08	36.3	0	1.1e-07	35.4	0	1.5	1	IPR000210(59...165)	unreviewed	BTB domain-containing protein	609	PF00651	59..164
	Neophocaena asiaeorientalis	Chordata	Craniata	Mammalia	Artiodactyla	1706337	A0A341CL06	5.3e-08	36.3	0	1.1e-07	35.4	0	1.5	1	IPR000210(59...165)	unreviewed	BTB domain-containing protein	609	PF00651	59..164
	Notechis scutatus	Chordata	Craniata	Lepidosauria	Squamata	8663	A0A6J1U200	5.4e-08	36.3	0	1.1e-07	35.4	0	1.5	1	IPR000210(59...165)	unreviewed	BTB domain-containing protein	618	PF00651	59..164
	Notechis scutatus	Chordata	Craniata	Lepidosauria	Squamata	8663	A0A6J1U8Y2	5.3e-08	36.3	0	1.1e-07	35.4	0	1.5	1	IPR000210(59...165)	unreviewed	BTB domain-containing protein	609	PF00651	59..164
	Nothobranchius furzeri	Chordata	Craniata	Actinopteri	Cyprinodontiformes	105023	A0A1A7ZE48	5.3e-08	36.4	0	1.1e-07	35.4	0	1.5	1	IPR000210(54...160)	unreviewed	BTB domain-containing protein	604	PF00651	54..159
	Nothobranchius furzeri	Chordata	Craniata	Actinopteri	Cyprinodontiformes	105023	A0A1A8VD11	4.3e-08	36.6	1.1	1.1e-07	35.3	0.3	2.1	1	IPR000210(31...138)	unreviewed	BTB domain-containing protein	591	PF00651	31..137
	Nothobranchius furzeri	Chordata	Craniata	Actinopteri	Cyprinodontiformes	105023	A0A8C6Q1T7	5.1e-08	36.4	0	1.1e-07	35.4	0	1.5	1	IPR000210(57...163)	unreviewed	BTB domain-containing protein	613	PF00651	57..162
	Nothobranchius furzeri	Chordata	Craniata	Actinopteri	Cyprinodontiformes	105023	A0A8C6Q4N4	5.1e-08	36.4	0	1.1e-07	35.4	0	1.5	1	IPR000210(54...160)	unreviewed	BTB domain-containing protein	610	PF00651	54..159
	Nothobranchius furzeri	Chordata	Craniata	Actinopteri	Cyprinodontiformes	105023	A0A9D2XXU1	4.4e-08	36.6	1.1	1.1e-07	35.3	0.3	2.1	1	IPR000210(31...138)	unreviewed	BTB domain-containing protein	597	PF00651	31..137
	Nothobranchius furzeri	Chordata	Craniata	Actinopteri	Cyprinodontiformes	105023	A0A9D2Y557	4.3e-08	36.6	0.6	1.1e-07	35.3	0.6	1.7	1	IPR000210(20...126)	unreviewed	Zinc finger and BTB domain containing 14	356	PF00651	20..122
	Nothobranchius furzeri	Chordata	Craniata	Actinopteri	Cyprinodontiformes	105023	A0A9D2YL55	5.3e-08	36.4	0	1.1e-07	35.4	0	1.5	1	IPR000210(57...163)	unreviewed	BTB domain-containing protein	607	PF00651	57..162
	Nothobranchius kadleci	Chordata	Craniata	Actinopteri	Cyprinodontiformes	1051664	A0A1A8DI41	5.3e-08	36.4	0	1.1e-07	35.4	0	1.5	1	IPR000210(54...160)	unreviewed	BTB domain-containing protein	604	PF00651	54..159
	Nothobranchius kadleci	Chordata	Craniata	Actinopteri	Cyprinodontiformes	1051664	A0A1A8EAF3	4.3e-08	36.6	1.1	1.1e-07	35.3	0.3	2.1	1	IPR000210(31...138)	unreviewed	BTB domain-containing protein	591	PF00651	31..137
	Nothobranchius korthausae	Chordata	Craniata	Actinopteri	Cyprinodontiformes	1143690	A0A1A8EVT1	5.3e-08	36.4	0	1.1e-07	35.4	0	1.5	1	IPR000210(54...160)	unreviewed	BTB domain-containing protein	604	PF00651	54..159
	Nothobranchius korthausae	Chordata	Craniata	Actinopteri	Cyprinodontiformes	1143690	A0A1A8GE99	4.3e-08	36.6	1.1	1.1e-07	35.3	0.3	2.1	1	IPR000210(31...138)	unreviewed	BTB domain-containing protein	591	PF00651	31..137
	Nothobranchius kuhntae	Chordata	Craniata	Actinopteri	Cyprinodontiformes	321403	A0A1A8IDU1	5.3e-08	36.4	0	1.1e-07	35.4	0	1.5	1	IPR000210(54...160)	unreviewed	BTB domain-containing protein	604	PF00651	54..159
	Nothobranchius kuhntae	Chordata	Craniata	Actinopteri	Cyprinodontiformes	321403	A0A1A8KA96	4.3e-08	36.6	1.1	1.1e-07	35.3	0.3	2.1	1	IPR000210(31...138)	unreviewed	BTB domain-containing protein	591	PF00651	31..137
	Nothobranchius pienaari	Chordata	Craniata	Actinopteri	Cyprinodontiformes	704102	A0A1A8Q1R0	4.3e-08	36.6	1.1	1.1e-07	35.3	0.3	2.1	1	IPR000210(31...138)	unreviewed	BTB domain-containing protein	591	PF00651	31..137
	Nothobranchius rachovii	Chordata	Craniata	Actinopteri	Cyprinodontiformes	451742	A0A1A8PV43	4.3e-08	36.6	1.1	1.1e-07	35.3	0.3	2.1	1	IPR000210(31...138)	unreviewed	BTB domain-containing protein	591	PF00651	31..137
	Nothobranchius rachovii	Chordata	Craniata	Actinopteri	Cyprinodontiformes	451742	A0A1A8SC04	5.3e-08	36.4	0	1.1e-07	35.4	0	1.5	1	IPR000210(54...160)	unreviewed	BTB domain-containing protein	604	PF00651	54..159
	Nothoprocta perdicaria	Chordata	Craniata	Aves	Tinamiformes	30464	A0A8C6YY89	3.8e-08	36.8	1.1	1.1e-07	35.4	0.3	2.1	1	IPR000210(36...143)	unreviewed	BTB domain-containing protein	563	PF00651	36..142
	Nothoprocta perdicaria	Chordata	Craniata	Aves	Tinamiformes	30464	A0A8C6ZMP1	3.1e-08	37.1	0.3	1.1e-07	35.3	0.5	1.9	1	IPR000210(20...126)	unreviewed	ZBT14 protein	340	PF00651	20..123
	Nothoprocta perdicaria	Chordata	Craniata	Aves	Tinamiformes	30464	A0A8C6ZRW4	5.3e-08	36.4	0	1.1e-07	35.4	0	1.5	1	IPR000210(58...164)	unreviewed	BTB domain-containing protein	608	PF00651	58..163
	Notothenia coriiceps	Chordata	Craniata	Actinopteri	Perciformes	8208	A0A6I9MSD7	5.3e-08	36.3	0	1.1e-07	35.4	0	1.5	1	IPR000210(59...165)	unreviewed	BTB domain-containing protein	609	PF00651	59..164
	Notothenia coriiceps	Chordata	Craniata	Actinopteri	Perciformes	8208	A0A6I9NF61	4.3e-08	36.7	1.1	1.1e-07	35.3	0.3	2.1	1	IPR000210(31...138)	unreviewed	BTB domain-containing protein	591	PF00651	31..137
	Notothenia coriiceps	Chordata	Craniata	Actinopteri	Perciformes	8208	A0A6I9NKZ3	4.4e-08	36.6	1.1	1.1e-07	35.3	0.3	2.1	1	IPR000210(31...138)	unreviewed	BTB domain-containing protein	597	PF00651	31..137
	Octodon degus	Chordata	Craniata	Mammalia	Rodentia	10160	A0A6P6E1M2	5.2e-08	36.4	0	1.1e-07	35.4	0	1.5	1	IPR000210(59...165)	unreviewed	BTB domain-containing protein	609	PF00651	59..164
	Odobenus rosmarus	Chordata	Craniata	Mammalia	Carnivora	9708	A0A2U3WKD7	5.3e-08	36.3	0	1.1e-07	35.4	0	1.5	1	IPR000210(59...165)	unreviewed	BTB domain-containing protein	609	PF00651	59..164
	Odocoileus virginianus	Chordata	Craniata	Mammalia	Artiodactyla	9880	A0A6J0Y8H2	4.9e-08	36.5	0	1.1e-07	35.3	0	1.6	1	IPR000210(83...189)	unreviewed	BTB domain-containing protein	633	PF00651	83..188
	Odocoileus virginianus	Chordata	Craniata	Mammalia	Artiodactyla	9880	A0A6J0Y8P6	5.3e-08	36.3	0	1.1e-07	35.4	0	1.5	1	IPR000210(59...165)	unreviewed	BTB domain-containing protein	609	PF00651	59..164
	Oncorhynchus kisutch	Chordata	Craniata	Actinopteri	Salmoniformes	8019	A0A8C7HUQ2	4.3e-08	36.6	1.1	1.1e-07	35.3	0.3	2.1	1	IPR000210(31...138)	unreviewed	BTB domain-containing protein	591	PF00651	31..137
	Oncorhynchus kisutch	Chordata	Craniata	Actinopteri	Salmoniformes	8019	A0A8C7IHJ1	5.5e-08	36.3	0	1.1e-07	35.3	0	1.5	1	IPR000210(78...184)	unreviewed	BTB domain-containing protein	628	PF00651	78..183
	Oncorhynchus kisutch	Chordata	Craniata	Actinopteri	Salmoniformes	8019	A0A8C7IKF6	5.4e-08	36.3	0	1.1e-07	35.4	0	1.5	1	IPR000210(59...165)	unreviewed	BTB domain-containing protein	609	PF00651	59..164
	Oncorhynchus kisutch	Chordata	Craniata	Actinopteri	Salmoniformes	8019	A0A8C7JX96	4.3e-08	36.6	1.1	1.1e-07	35.3	0.3	2.1	1	IPR000210(33...140)	unreviewed	BTB domain-containing protein	593	PF00651	33..139
	Oncorhynchus kisutch	Chordata	Craniata	Actinopteri	Salmoniformes	8019	A0A8C7MKX4	4.3e-08	36.6	1.1	1.1e-07	35.3	0.3	2.1	1	IPR000210(32...139)	unreviewed	BTB domain-containing protein	597	PF00651	32..138
	Oncorhynchus mykiss	Chordata	Craniata	Actinopteri	Salmoniformes	8022	A0A060VTZ5	5.5e-08	36.3	0	1.1e-07	35.3	0	1.5	1	IPR000210(82...188)	unreviewed	BTB domain-containing protein	632	PF00651	82..187
	Oncorhynchus mykiss	Chordata	Craniata	Actinopteri	Salmoniformes	8022	A0A060XRK6	4.3e-08	36.6	1.1	1.1e-07	35.3	0.3	2.1	1	IPR000210(31...138)	unreviewed	BTB domain-containing protein	591	PF00651	31..137
	Oncorhynchus mykiss	Chordata	Craniata	Actinopteri	Salmoniformes	8022	A0A8C7P1L0	5.5e-08	36.3	0	1.1e-07	35.3	0	1.5	1	IPR000210(73...179)	unreviewed	BTB domain-containing protein	623	PF00651	73..178
	Oncorhynchus mykiss	Chordata	Craniata	Actinopteri	Salmoniformes	8022	A0A8C7RQM0	5.3e-08	36.4	0	1.1e-07	35.4	0	1.5	1	IPR000210(57...163)	unreviewed	BTB domain-containing protein	607	PF00651	57..162
	Oncorhynchus mykiss	Chordata	Craniata	Actinopteri	Salmoniformes	8022	A0A8C7RW77	5.3e-08	36.3	0	1.1e-07	35.4	0	1.5	1	IPR000210(59...165)	unreviewed	BTB domain-containing protein	609	PF00651	59..164
	Oncorhynchus tshawytscha	Chordata	Craniata	Actinopteri	Salmoniformes	74940	A0A8C8BYX4	4.3e-08	36.6	1.1	1.1e-07	35.3	0.3	2.1	1	IPR000210(32...139)	unreviewed	BTB domain-containing protein	597	PF00651	32..138
	Oncorhynchus tshawytscha	Chordata	Craniata	Actinopteri	Salmoniformes	74940	A0A8C8CH41	5.3e-08	36.3	0	1.1e-07	35.4	0	1.5	1	IPR000210(59...165)	unreviewed	BTB domain-containing protein	609	PF00651	59..164
	Oncorhynchus tshawytscha	Chordata	Craniata	Actinopteri	Salmoniformes	74940	A0A8C8LMY6	5.4e-08	36.3	0	1.1e-07	35.4	0	1.5	1	IPR000210(59...165)	unreviewed	BTB domain-containing protein	609	PF00651	59..164
	Oncorhynchus tshawytscha	Chordata	Craniata	Actinopteri	Salmoniformes	74940	A0A8C8LPS2	4.3e-08	36.6	1.1	1.1e-07	35.3	0.3	2.1	1	IPR000210(32...139)	unreviewed	BTB domain-containing protein	592	PF00651	32..138
	Opisthocomus hoazin	Chordata	Craniata	Aves	Opisthocomiformes	30419	A0A091WFX7	5.3e-08	36.4	0	1.1e-07	35.4	0	1.5	1	IPR000210(55...161)	unreviewed	BTB domain-containing protein	605	PF00651	55..160
	Oreochromis aureus	Chordata	Craniata	Actinopteri	Cichliformes	47969	A0A668VRI7	4.3e-08	36.6	1.1	1.1e-07	35.3	0.3	2.1	1	IPR000210(31...138)	unreviewed	BTB domain-containing protein	591	PF00651	31..137
	Oreochromis niloticus	Chordata	Craniata	Actinopteri	Cichliformes	8128	A0A669C470	5.3e-08	36.3	0	1.1e-07	35.4	0	1.5	1	IPR000210(59...165)	unreviewed	BTB domain-containing protein	609	PF00651	59..164
	Oreochromis niloticus	Chordata	Craniata	Actinopteri	Cichliformes	8128	A0A669DCS3	5.2e-08	36.4	0	1.1e-07	35.4	0	1.5	1	IPR000210(54...160)	unreviewed	BTB domain-containing protein	604	PF00651	54..159
	Oreochromis niloticus	Chordata	Craniata	Actinopteri	Cichliformes	8128	A0A669EHX2	4.3e-08	36.6	1.1	1.1e-07	35.3	0.3	2.1	1	IPR000210(31...138)	unreviewed	BTB domain-containing protein	591	PF00651	31..137
	Oreochromis niloticus	Chordata	Craniata	Actinopteri	Cichliformes	8128	A0A669ENK4	4.1e-08	36.7	1.1	1.1e-07	35.3	0.3	2.1	1	IPR000210(30...137)	unreviewed	BTB domain-containing protein	583	PF00651	30..136
	Oreochromis niloticus	Chordata	Craniata	Actinopteri	Cichliformes	8128	I3KIN4	5.3e-08	36.3	0	1.1e-07	35.4	0	1.5	1	IPR000210(59...165)	unreviewed	BTB domain-containing protein	609	PF00651	59..164
	Ornithorhynchus anatinus	Chordata	Craniata	Mammalia	Monotremata	9258	F6QG34	5.3e-08	36.3	0	1.1e-07	35.4	0	1.5	1	IPR000210(59...165)	unreviewed	BTB domain-containing protein	609	PF00651	59..164
	Ornithorhynchus anatinus	Chordata	Craniata	Mammalia	Monotremata	9258	F6QG43	5.6e-08	36.3	0	1.1e-07	35.3	0	1.5	1	IPR000210(87...193)	unreviewed	BTB domain-containing protein	637	PF00651	87..192
	Oryctolagus cuniculus	Chordata	Craniata	Mammalia	Lagomorpha	9986	G1SX14	5.3e-08	36.4	0	1.1e-07	35.4	0	1.5	1	IPR000210(59...165)	unreviewed	BTB domain-containing protein	609	PF00651	59..164
	Oryzias javanicus	Chordata	Craniata	Actinopteri	Beloniformes	123683	A0A437CHA1	5.3e-08	36.3	0	1.1e-07	35.4	0	1.5	1	IPR000210(59...165)	unreviewed	BTB domain-containing protein	609	PF00651	59..164
	Oryzias latipes	Chordata	Craniata	Actinopteri	Beloniformes	8090	A0A3P9K7M6	5.3e-08	36.4	0	1.1e-07	35.4	0	1.5	1	IPR000210(59...165)	unreviewed	BTB domain-containing protein	609	PF00651	59..164
	Oryzias latipes	Chordata	Craniata	Actinopteri	Beloniformes	8090	A0A3P9KSV4	4.4e-08	36.6	1.1	1.1e-07	35.3	0.3	2.1	1	IPR000210(31...138)	unreviewed	BTB domain-containing protein	591	PF00651	31..137
	Oryzias latipes	Chordata	Craniata	Actinopteri	Beloniformes	8090	H2LLP0	4.4e-08	36.6	1.1	1.1e-07	35.3	0.3	2.1	1	IPR000210(31...138)	unreviewed	BTB domain-containing protein	591	PF00651	31..137
	Oryzias latipes	Chordata	Craniata	Actinopteri	Beloniformes	8090	H2MD39	5.3e-08	36.4	0	1.1e-07	35.4	0	1.5	1	IPR000210(59...165)	unreviewed	BTB domain-containing protein	609	PF00651	59..164
	Oryzias melastigma	Chordata	Craniata	Actinopteri	Beloniformes	30732	A0A3B3CAS2	5.3e-08	36.4	0	1.1e-07	35.4	0	1.5	1	IPR000210(59...165)	unreviewed	BTB domain-containing protein	609	PF00651	59..164
	Oryzias melastigma	Chordata	Craniata	Actinopteri	Beloniformes	30732	A0A3B3CQW8	4.4e-08	36.6	1.1	1.1e-07	35.3	0.3	2.1	1	IPR000210(31...138)	unreviewed	BTB domain-containing protein	591	PF00651	31..137
	Oryzias sinensis	Chordata	Craniata	Actinopteri	Beloniformes	183150	A0A8C7XYJ0	5.3e-08	36.4	0	1.1e-07	35.4	0	1.5	1	IPR000210(59...165)	unreviewed	BTB domain-containing protein	609	PF00651	59..164
	Otolemur garnettii	Chordata	Craniata	Mammalia	Primates	30611	H0WP07	5.3e-08	36.4	0	1.1e-07	35.4	0	1.5	1	IPR000210(59...165)	unreviewed	BTB domain-containing protein	609	PF00651	59..164
	Otus sunia	Chordata	Craniata	Aves	Strigiformes	257818	A0A8C8AUX1	4.3e-08	36.7	1.1	1.1e-07	35.3	0.3	2.1	1	IPR000210(30...137)	unreviewed	BTB domain-containing protein	590	PF00651	30..136
	Otus sunia	Chordata	Craniata	Aves	Strigiformes	257818	A0A8C8EFF3	5.6e-08	36.3	0	1.1e-07	35.3	0	1.5	1	IPR000210(59...165)	unreviewed	BTB domain-containing protein	641	PF00651	59..164
	Otus sunia	Chordata	Craniata	Aves	Strigiformes	257818	A0A8C8EFU5	5.3e-08	36.4	0	1.1e-07	35.4	0	1.5	1	IPR000210(59...165)	unreviewed	BTB domain-containing protein	618	PF00651	59..164
	Ovis aries	Chordata	Craniata	Mammalia	Artiodactyla	9940	A0A836A754	5.3e-08	36.3	0	1.1e-07	35.4	0	1.5	1	IPR000210(59...165)	unreviewed	BTB domain-containing protein	609	PF00651	59..164
	Ovis aries	Chordata	Craniata	Mammalia	Artiodactyla	9940	W5PS25	5.4e-08	36.3	0	1.1e-07	35.4	0	1.5	1	IPR000210(72...178)	unreviewed	BTB domain-containing protein	622	PF00651	72..177
	Pan paniscus	Chordata	Craniata	Mammalia	Primates	9597	A0A2R9B5T6	5.3e-08	36.3	0	1.1e-07	35.4	0	1.5	1	IPR000210(59...165)	unreviewed	BTB domain-containing protein	609	PF00651	59..164
	Pan troglodytes	Chordata	Craniata	Mammalia	Primates	9598	A0A6D2WS91	5.3e-08	36.3	0	1.1e-07	35.4	0	1.5	1	IPR000210(59...165)	unreviewed	BTB domain-containing protein	609	PF00651	59..164
	Pan troglodytes	Chordata	Craniata	Mammalia	Primates	9598	H2Q0M8	5.3e-08	36.3	0	1.1e-07	35.4	0	1.5	1	IPR000210(59...165)	unreviewed	BTB domain-containing protein	609	PF00651	59..164
	Pangasianodon hypophthalmus	Chordata	Craniata	Actinopteri	Siluriformes	310915	A0A5N5PKG7	5.5e-08	36.3	0	1.1e-07	35.4	0	1.5	1	IPR000210(72...178)	unreviewed	BTB domain-containing protein	622	PF00651	72..177
	Panthera leo	Chordata	Craniata	Mammalia	Carnivora	9689	A0A8C9D788	5.3e-08	36.3	0	1.1e-07	35.4	0	1.5	1	IPR000210(59...165)	unreviewed	BTB domain-containing protein	609	PF00651	59..164
	Panthera pardus	Chordata	Craniata	Mammalia	Carnivora	9691	A0A9V1EFW8	5.3e-08	36.3	0	1.1e-07	35.4	0	1.5	1	IPR000210(59...165)	unreviewed	BTB domain-containing protein	609	PF00651	59..164
	Panthera tigris	Chordata	Craniata	Mammalia	Carnivora	74533	A0A8C9KMD9	5.3e-08	36.3	0	1.1e-07	35.4	0	1.5	1	IPR000210(59...165)	unreviewed	BTB domain-containing protein	609	PF00651	59..164
	Pantherophis guttatus	Chordata	Craniata	Lepidosauria	Squamata	94885	A0A6P9AWS1	4.2e-08	36.7	1.1	1.1e-07	35.3	0.3	2.1	1	IPR000210(30...137)	unreviewed	BTB domain-containing protein	590	PF00651	30..136
	Pantherophis guttatus	Chordata	Craniata	Lepidosauria	Squamata	94885	A0A6P9B376	5.3e-08	36.3	0	1.1e-07	35.4	0	1.5	1	IPR000210(59...165)	unreviewed	BTB domain-containing protein	609	PF00651	59..164
	Pantherophis guttatus	Chordata	Craniata	Lepidosauria	Squamata	94885	A0A6P9BHQ0	5.3e-08	36.3	0	1.1e-07	35.4	0	1.5	1	IPR000210(59...165)	unreviewed	BTB domain-containing protein	609	PF00651	59..164
	Papio anubis	Chordata	Craniata	Mammalia	Primates	9555	A0A096N993	5.2e-08	36.4	0	1.1e-07	35.4	0	1.5	1	IPR000210(55...161)	unreviewed	BTB domain-containing protein	605	PF00651	55..160
	Papio anubis	Chordata	Craniata	Mammalia	Primates	9555	A0A2I3NDN9	3.7e-08	36.8	0	1.1e-07	35.3	0	1.8	1	IPR000210(135...241)	unreviewed	BTB domain-containing protein	632	PF00651	135..240
	Papio anubis	Chordata	Craniata	Mammalia	Primates	9555	A0A8I5N3S2	4.1e-08	36.7	0	1.1e-07	35.3	0	1.7	1	IPR000210(135...241)	unreviewed	BTB domain-containing protein	637	PF00651	135..240
	Parambassis ranga	Chordata	Craniata	Actinopteri		210632	A0A6P7IIG1	4.3e-08	36.7	1.1	1.1e-07	35.3	0.3	2.1	1	IPR000210(31...138)	unreviewed	BTB domain-containing protein	591	PF00651	31..137
	Parambassis ranga	Chordata	Craniata	Actinopteri		210632	A0A6P7IPQ2	4.3e-08	36.6	1.1	1.1e-07	35.3	0.3	2.1	1	IPR000210(31...138)	unreviewed	BTB domain-containing protein	597	PF00651	31..137
	Parambassis ranga	Chordata	Craniata	Actinopteri		210632	A0A6P7K2C7	5.3e-08	36.3	0	1.1e-07	35.4	0	1.5	1	IPR000210(59...165)	unreviewed	BTB domain-containing protein	609	PF00651	59..164
	Paramormyrops kingsleyae	Chordata	Craniata	Actinopteri	Osteoglossiformes	1676925	A0A3B3R3U2	4.2e-08	36.7	1.1	1.1e-07	35.3	0.3	2.1	1	IPR000210(58...164)	unreviewed	BTB domain-containing protein	596	PF00651	58..163
	Paramormyrops kingsleyae	Chordata	Craniata	Actinopteri	Osteoglossiformes	1676925	A0A3B3SDB6	5.3e-08	36.3	0	1.1e-07	35.4	0	1.5	1	IPR000210(59...165)	unreviewed	BTB domain-containing protein	609	PF00651	59..164
	Patagioenas fasciata	Chordata	Craniata	Aves	Columbiformes	372326	A0A1V4JZ19	5.4e-08	36.3	0	1.1e-07	35.4	0	1.5	1	IPR000210(59...165)	unreviewed	BTB domain-containing protein	618	PF00651	59..164
	Pavo cristatus	Chordata	Craniata	Aves	Galliformes	9049	A0A8C9G9E6	5.3e-08	36.3	0	1.1e-07	35.4	0	1.5	1	IPR000210(59...165)	unreviewed	BTB domain-containing protein	608	PF00651	59..164
	Pelodiscus sinensis	Chordata	Craniata		Testudines	13735	K7G1M7	4.4e-08	36.6	1.1	1.1e-07	35.3	0.3	2.1	1	IPR000210(39...148)	unreviewed	BTB domain-containing protein	601	PF00651	39..123
	Pelodiscus sinensis	Chordata	Craniata		Testudines	13735	K7GGK9	5.3e-08	36.4	0	1.1e-07	35.3	0	1.5	1	IPR000210(59...165)	unreviewed	BTB domain-containing protein	646	PF00651	59..164
	Pelusios castaneus	Chordata	Craniata		Testudines	367368	A0A8C8R988	5.3e-08	36.3	0	1.1e-07	35.4	0	1.5	1	IPR000210(59...165)	unreviewed	BTB domain-containing protein	614	PF00651	59..164
	Pelusios castaneus	Chordata	Craniata		Testudines	367368	A0A8C8VNR4	4.3e-08	36.6	1.1	1.1e-07	35.3	0.3	2.1	1	IPR000210(34...141)	unreviewed	BTB domain-containing protein	594	PF00651	34..140
	Perca flavescens	Chordata	Craniata	Actinopteri	Perciformes	8167	A0A484CU56	5.3e-08	36.3	0	1.1e-07	35.4	0	1.5	1	IPR000210(59...165)	unreviewed	BTB domain-containing protein	609	PF00651	59..164
	Perca fluviatilis	Chordata	Craniata	Actinopteri	Perciformes	8168	A0A6A5EMW8	4.3e-08	36.6	1.1	1.1e-07	35.3	0.3	2.1	1	IPR000210(31...138)	unreviewed	BTB domain-containing protein	597	PF00651	31..137
	Perca fluviatilis	Chordata	Craniata	Actinopteri	Perciformes	8168	A0A6A5EVY6	5.7e-08	36.3	0	1.1e-07	35.3	0	1.5	1	IPR000210(94...200)	unreviewed	BTB domain-containing protein	644	PF00651	94..199
	Peromyscus maniculatus	Chordata	Craniata	Mammalia	Rodentia	230844	A0A6I9LI52	5.3e-08	36.3	0	1.1e-07	35.4	0	1.5	1	IPR000210(59...165)	unreviewed	BTB domain-containing protein	609	PF00651	59..164
	Peromyscus maniculatus	Chordata	Craniata	Mammalia	Rodentia	230844	A0A8C8T302	5.3e-08	36.4	0	1.1e-07	35.4	0	1.5	1	IPR000210(54...160)	unreviewed	BTB domain-containing protein	604	PF00651	54..159
	Phascolarctos cinereus	Chordata	Craniata	Mammalia	Diprotodontia	38626	A0A6P5IYG8	5.3e-08	36.3	0	1.1e-07	35.4	0	1.5	1	IPR000210(59...165)	unreviewed	BTB domain-containing protein	608	PF00651	59..164
	Phascolarctos cinereus	Chordata	Craniata	Mammalia	Diprotodontia	38626	A0A6P5J4J8	5.3e-08	36.3	0	1.1e-07	35.4	0	1.5	1	IPR000210(59...165)	unreviewed	BTB domain-containing protein	609	PF00651	59..164
	Phasianus colchicus	Chordata	Craniata	Aves	Galliformes	9054	A0A669QVG1	4.3e-08	36.7	1.1	1.1e-07	35.3	0.3	2.1	1	IPR000210(30...137)	unreviewed	BTB domain-containing protein	590	PF00651	30..136
	Phocoena sinus	Chordata	Craniata	Mammalia	Artiodactyla	42100	A0A8C9CKG2	5.3e-08	36.3	0	1.1e-07	35.4	0	1.5	1	IPR000210(59...165)	unreviewed	BTB domain-containing protein	609	PF00651	59..164
	Phrynocephalus forsythii	Chordata	Craniata	Lepidosauria	Squamata	171643	A0A9Q0XY24	5.3e-08	36.3	0	1.1e-07	35.4	0	1.5	1	IPR000210(59...165)	unreviewed	BTB domain-containing protein	609	PF00651	59..164
	Phyllostomus discolor	Chordata	Craniata	Mammalia	Chiroptera	89673	A0A6J2N912	5.3e-08	36.3	0	1.1e-07	35.4	0	1.5	1	IPR000210(59...165)	unreviewed	BTB domain-containing protein	609	PF00651	59..164
	Piliocolobus tephrosceles	Chordata	Craniata	Mammalia	Primates	591936	A0A8C9H5B7	5.3e-08	36.3	0	1.1e-07	35.4	0	1.5	1	IPR000210(59...165)	unreviewed	BTB domain-containing protein	609	PF00651	59..164
	Pipistrellus kuhlii	Chordata	Craniata	Mammalia	Chiroptera	59472	A0A7J7UTC3	5.3e-08	36.3	0	1.1e-07	35.4	0	1.5	1	IPR000210(59...165)	unreviewed	BTB domain-containing protein	609	PF00651	59..164
	Pipra filicauda	Chordata	Craniata	Aves	Passeriformes	649802	A0A6J2I8P5	5.3e-08	36.3	0	1.1e-07	35.4	0	1.5	1	IPR000210(59...165)	unreviewed	BTB domain-containing protein	609	PF00651	59..164
	Pipra filicauda	Chordata	Craniata	Aves	Passeriformes	649802	A0A6J2IA10	5.3e-08	36.4	0	1.1e-07	35.4	0	1.5	1	IPR000210(59...165)	unreviewed	BTB domain-containing protein	618	PF00651	59..164
	Pipra filicauda	Chordata	Craniata	Aves	Passeriformes	649802	A0A6J2IB36	5.3e-08	36.4	0	1.1e-07	35.4	0	1.5	1	IPR000210(62...168)	unreviewed	BTB domain-containing protein	621	PF00651	62..167
	Podarcis lilfordi	Chordata	Craniata	Lepidosauria	Squamata	74358	A0AA35KDK9	5.3e-08	36.3	0	1.1e-07	35.4	0	1.5	1	IPR000210(59...165)	unreviewed	BTB domain-containing protein	609	PF00651	59..164
	Podarcis lilfordi	Chordata	Craniata	Lepidosauria	Squamata	74358	A0AA35KSH0	3.9e-08	36.8	1.1	1.1e-07	35.4	0.3	2.1	1	IPR000210(30...137)	unreviewed	BTB domain-containing protein	590	PF00651	30..136
	Podarcis muralis	Chordata	Craniata	Lepidosauria	Squamata	64176	A0A670HTA7	5.3e-08	36.3	0	1.1e-07	35.4	0	1.5	1	IPR000210(59...165)	unreviewed	BTB domain-containing protein	609	PF00651	59..164
	Podarcis muralis	Chordata	Craniata	Lepidosauria	Squamata	64176	A0A670JD09	3.9e-08	36.8	1.1	1.1e-07	35.4	0.3	2.1	1	IPR000210(30...137)	unreviewed	BTB domain-containing protein	590	PF00651	30..136
	Poecilia formosa	Chordata	Craniata	Actinopteri	Cyprinodontiformes	48698	A0A087X861	5.3e-08	36.3	0	1.1e-07	35.4	0	1.5	1	IPR000210(59...165)	unreviewed	BTB domain-containing protein	609	PF00651	59..164
	Poecilia latipinna	Chordata	Craniata	Actinopteri	Cyprinodontiformes	48699	A0A3B3TMU5	5.3e-08	36.3	0	1.1e-07	35.4	0	1.5	1	IPR000210(59...165)	unreviewed	BTB domain-containing protein	609	PF00651	59..164
	Poecilia latipinna	Chordata	Craniata	Actinopteri	Cyprinodontiformes	48699	A0A3B3VYT1	4.4e-08	36.6	1.1	1.1e-07	35.3	0.3	2.1	1	IPR000210(31...138)	unreviewed	BTB domain-containing protein	591	PF00651	31..137
	Poecilia mexicana	Chordata	Craniata	Actinopteri	Cyprinodontiformes	48701	A0A3B3Y9N8	4.4e-08	36.6	1.1	1.1e-07	35.3	0.3	2.1	1	IPR000210(31...138)	unreviewed	BTB domain-containing protein	591	PF00651	31..137
	Poecilia mexicana	Chordata	Craniata	Actinopteri	Cyprinodontiformes	48701	A0A3B3YL38	5.3e-08	36.4	0	1.1e-07	35.4	0	1.5	1	IPR000210(54...160)	unreviewed	BTB domain-containing protein	604	PF00651	54..159
	Poecilia mexicana	Chordata	Craniata	Actinopteri	Cyprinodontiformes	48701	A0A3B3YL54	5.3e-08	36.3	0	1.1e-07	35.4	0	1.5	1	IPR000210(59...165)	unreviewed	BTB domain-containing protein	609	PF00651	59..164
	Poecilia reticulata	Chordata	Craniata	Actinopteri	Cyprinodontiformes	8081	A0A3P9PLD9	5.3e-08	36.3	0	1.1e-07	35.4	0	1.5	1	IPR000210(59...165)	unreviewed	BTB domain-containing protein	609	PF00651	59..164
	Pogona vitticeps	Chordata	Craniata	Lepidosauria	Squamata	103695	A0A6J0SSK0	4.3e-08	36.7	1.1	1.1e-07	35.3	0.3	2.1	1	IPR000210(30...137)	unreviewed	BTB domain-containing protein	590	PF00651	30..136
	Pogona vitticeps	Chordata	Craniata	Lepidosauria	Squamata	103695	A0A6J0U7D3	5.3e-08	36.3	0	1.1e-07	35.4	0	1.5	1	IPR000210(59...165)	unreviewed	BTB domain-containing protein	609	PF00651	59..164
	Pogonophryne albipinna	Chordata	Craniata	Actinopteri	Perciformes	1090488	A0AAD6AZ64	4.4e-08	36.6	1.1	1.1e-07	35.3	0.3	2.1	1	IPR000210(31...138)	unreviewed	Uncharacterized protein	597	PF00651	31..137
	Pogonophryne albipinna	Chordata	Craniata	Actinopteri	Perciformes	1090488	A0AAD6B5B9	5.3e-08	36.3	0	1.1e-07	35.4	0	1.5	1	IPR000210(59...165)	unreviewed	Uncharacterized protein	609	PF00651	59..164
	Polypterus senegalus	Chordata	Craniata	Cladistia	Polypteriformes	55291	A0A8X7X160	6.3e-08	36.1	0.3	1.1e-07	35.4	0.3	1.4	1	IPR000210(98...206)	unreviewed	BTB domain-containing protein	563	PF00651	98..192
	Pongo abelii	Chordata	Craniata	Mammalia	Primates	9601	A0A2J8UBU4	5.3e-08	36.3	0	1.1e-07	35.4	0	1.5	1	IPR000210(59...165)	unreviewed	BTB domain-containing protein	609	PF00651	59..164
	Pongo abelii	Chordata	Craniata	Mammalia	Primates	9601	H2N4N4	5.4e-08	36.3	0	1.1e-07	35.4	0	1.5	1	IPR000210(68...174)	unreviewed	BTB domain-containing protein	618	PF00651	68..173
	Pongo abelii	Chordata	Craniata	Mammalia	Primates	9601	Q5R7B8	5.3e-08	36.3	0	1.1e-07	35.4	0	1.5	1	IPR000210(59...165)	reviewed	Kelch-like protein 20	609	PF00651	59..164
	Prolemur simus	Chordata	Craniata	Mammalia	Primates	1328070	A0A8C8Z8B2	5.3e-08	36.4	0	1.1e-07	35.4	0	1.5	1	IPR000210(54...160)	unreviewed	BTB domain-containing protein	604	PF00651	54..159
	Pseudonaja textilis	Chordata	Craniata	Lepidosauria	Squamata	8673	A0A670Y2B2	5.3e-08	36.3	0	1.1e-07	35.4	0	1.5	1	IPR000210(59...165)	unreviewed	BTB domain-containing protein	609	PF00651	59..164
	Pteropus alecto	Chordata	Craniata	Mammalia	Chiroptera	9402	L5KYJ8	5.7e-08	36.3	0	1.1e-07	35.3	0	1.5	1	IPR000210(102...208)	unreviewed	BTB domain-containing protein	652	PF00651	102..207
	Pundamilia nyererei	Chordata	Craniata	Actinopteri	Cichliformes	303518	A0A3B4G1R9	5.3e-08	36.3	0	1.1e-07	35.4	0	1.5	1	IPR000210(59...165)	unreviewed	BTB domain-containing protein	609	PF00651	59..164
	Pundamilia nyererei	Chordata	Craniata	Actinopteri	Cichliformes	303518	A0A9Y3R890	4.4e-08	36.6	1.1	1.1e-07	35.3	0.3	2.1	1	IPR000210(31...138)	unreviewed	BTB domain-containing protein	597	PF00651	31..137
	Pundamilia nyererei	Chordata	Craniata	Actinopteri	Cichliformes	303518	A0A9Y3RDP9	4.3e-08	36.6	1.1	1.1e-07	35.3	0.3	2.1	1	IPR000210(31...138)	unreviewed	BTB domain-containing protein	591	PF00651	31..137
	Pygocentrus nattereri	Chordata	Craniata	Actinopteri	Characiformes	42514	A0A3B4E8K3	4.3e-08	36.6	1.1	1.1e-07	35.3	0.3	2.1	1	IPR000210(31...138)	unreviewed	BTB domain-containing protein	591	PF00651	31..137
	Python bivittatus	Chordata	Craniata	Lepidosauria	Squamata	176946	A0A9F2NHP4	5.3e-08	36.3	0	1.1e-07	35.4	0	1.5	1	IPR000210(59...165)	unreviewed	BTB domain-containing protein	609	PF00651	59..164
	Python bivittatus	Chordata	Craniata	Lepidosauria	Squamata	176946	A0A9F2R3K3	4.2e-08	36.7	1.1	1.1e-07	35.3	0.3	2.1	1	IPR000210(30...137)	unreviewed	BTB domain-containing protein	590	PF00651	30..136
	Ranitomeya imitator	Chordata	Craniata	Amphibia	Anura	111125	A0A822G1C7	8.8e-08	35.7	0.1	1.1e-07	35.3	0.1	1.3	1	IPR000210(1...76)	unreviewed	BTB domain-containing protein	76	PF00651	1..74
	Ranitomeya imitator	Chordata	Craniata	Amphibia	Anura	111125	A0A822IP61	1.1e-07	35.3	0.7	1.1e-07	35.3	0.7	1.9	1	IPR000210(16...122)	unreviewed	BTB domain-containing protein	179	PF00651	16..111
	Rattus norvegicus	Chordata	Craniata	Mammalia	Rodentia	10116	A0A8L2QYR5	5.6e-08	36.3	0	1.1e-07	35.3	0	1.5	1	IPR000210(83...189)	unreviewed	BTB domain-containing protein	633	PF00651	83..188
	Rattus norvegicus	Chordata	Craniata	Mammalia	Rodentia	10116	D3Z8N4	5.3e-08	36.3	0	1.1e-07	35.4	0	1.5	1	IPR000210(59...165)	reviewed	Kelch-like protein 20	609	PF00651	59..164
	Rhinolophus ferrumequinum	Chordata	Craniata	Mammalia	Chiroptera	59479	A0A671FCB8	5.3e-08	36.3	0	1.1e-07	35.4	0	1.5	1	IPR000210(59...165)	unreviewed	BTB domain-containing protein	609	PF00651	59..164
	Rhinopithecus bieti	Chordata	Craniata	Mammalia	Primates	61621	A0A2K6L563	5.3e-08	36.3	0	1.1e-07	35.4	0	1.5	1	IPR000210(59...165)	unreviewed	BTB domain-containing protein	609	PF00651	59..164
	Rhinopithecus roxellana	Chordata	Craniata	Mammalia	Primates	61622	A0A2K6QRS3	5.3e-08	36.3	0	1.1e-07	35.4	0	1.5	1	IPR000210(59...165)	unreviewed	BTB domain-containing protein	609	PF00651	59..164
	Rousettus aegyptiacus	Chordata	Craniata	Mammalia	Chiroptera	9407	A0A7J8BDZ9	5.3e-08	36.3	0	1.1e-07	35.4	0	1.5	1	IPR000210(59...165)	unreviewed	BTB domain-containing protein	609	PF00651	59..164
	Rousettus aegyptiacus	Chordata	Craniata	Mammalia	Chiroptera	9407	A0A7J8BR53	4.5e-08	36.6	0.1	1.1e-07	35.3	0.1	1.7	1	IPR000210(46...153)	unreviewed	BTB domain-containing protein	319	PF00651	46..152
	Saimiri boliviensis	Chordata	Craniata	Mammalia	Primates	39432	A0A2K6TVJ8	5.3e-08	36.3	0	1.1e-07	35.4	0	1.5	1	IPR000210(59...165)	unreviewed	BTB domain-containing protein	609	PF00651	59..164
	Saimiri boliviensis	Chordata	Craniata	Mammalia	Primates	39432	A0A2K6TVK6	5.3e-08	36.4	0	1.1e-07	35.4	0	1.5	1	IPR000210(53...159)	unreviewed	BTB domain-containing protein	603	PF00651	53..158
	Salarias fasciatus	Chordata	Craniata	Actinopteri	Blenniiformes	181472	A0A672G8G0	2.6e-08	37.3	4.1	1.1e-07	35.4	0.3	3	1	IPR000210(30...137)	unreviewed	BTB domain-containing protein	569	PF00651	30..136
	Salarias fasciatus	Chordata	Craniata	Actinopteri	Blenniiformes	181472	A0A672GUX2	3.7e-08	36.8	1.1	1.1e-07	35.4	0.3	2.2	1	IPR000210(41...148)	unreviewed	BTB domain-containing protein	572	PF00651	41..147
	Salarias fasciatus	Chordata	Craniata	Actinopteri	Blenniiformes	181472	A0A672JJW3	5.3e-08	36.3	0	1.1e-07	35.4	0	1.5	1	IPR000210(59...165)	unreviewed	BTB domain-containing protein	609	PF00651	59..164
	Salmo salar	Chordata	Craniata	Actinopteri	Salmoniformes	8030	A0A1S3LM01	4.3e-08	36.6	1.1	1.1e-07	35.3	0.3	2.1	1	IPR000210(31...138)	unreviewed	BTB domain-containing protein	591	PF00651	31..137
	Salmo salar	Chordata	Craniata	Actinopteri	Salmoniformes	8030	A0A1S3LM13	4.4e-08	36.6	1.1	1.1e-07	35.3	0.3	2.1	1	IPR000210(31...138)	unreviewed	BTB domain-containing protein	601	PF00651	31..137
	Salmo salar	Chordata	Craniata	Actinopteri	Salmoniformes	8030	A0A1S3LX01	5.5e-08	36.3	0	1.1e-07	35.3	0	1.5	1	IPR000210(73...179)	unreviewed	BTB domain-containing protein	623	PF00651	73..178
	Salmo salar	Chordata	Craniata	Actinopteri	Salmoniformes	8030	A0A1S3LX43	5.3e-08	36.3	0	1.1e-07	35.4	0	1.5	1	IPR000210(59...165)	unreviewed	BTB domain-containing protein	609	PF00651	59..164
	Salmo salar	Chordata	Craniata	Actinopteri	Salmoniformes	8030	A0A1S3LXC8	5.4e-08	36.3	0	1.1e-07	35.4	0	1.5	1	IPR000210(65...171)	unreviewed	BTB domain-containing protein	615	PF00651	65..170
	Salmo salar	Chordata	Craniata	Actinopteri	Salmoniformes	8030	A0A1S3LXX2	5.5e-08	36.3	0	1.1e-07	35.4	0	1.5	1	IPR000210(73...179)	unreviewed	BTB domain-containing protein	622	PF00651	73..178
	Salmo trutta	Chordata	Craniata	Actinopteri	Salmoniformes	8032	A0A673Z487	5.3e-08	36.4	0	1.1e-07	35.4	0	1.5	1	IPR000210(53...159)	unreviewed	BTB domain-containing protein	603	PF00651	53..158
	Salmo trutta	Chordata	Craniata	Actinopteri	Salmoniformes	8032	A0A673Z5A7	5.3e-08	36.3	0	1.1e-07	35.4	0	1.5	1	IPR000210(58...164)	unreviewed	BTB domain-containing protein	608	PF00651	58..163
	Salmo trutta	Chordata	Craniata	Actinopteri	Salmoniformes	8032	A0A674C1W9	5.6e-08	36.3	0	1.1e-07	35.3	0	1.5	1	IPR000210(95...201)	unreviewed	BTB domain-containing protein	645	PF00651	95..200
	Salmo trutta	Chordata	Craniata	Actinopteri	Salmoniformes	8032	A0A674C1Z8	5.4e-08	36.3	0	1.1e-07	35.4	0	1.5	1	IPR000210(65...171)	unreviewed	BTB domain-containing protein	615	PF00651	65..170
	Salvator merianae	Chordata	Craniata	Lepidosauria	Squamata	96440	A0A8D0BXJ3	5.4e-08	36.3	0	1.1e-07	35.4	0	1.5	1	IPR000210(59...165)	unreviewed	BTB domain-containing protein	609	PF00651	59..164
	Salvator merianae	Chordata	Craniata	Lepidosauria	Squamata	96440	A0A8D0BZI7	4.3e-08	36.7	1.1	1.1e-07	35.3	0.3	2.1	1	IPR000210(30...137)	unreviewed	BTB domain-containing protein	590	PF00651	30..136
	Salvelinus namaycush	Chordata	Craniata	Actinopteri	Salmoniformes	8040	A0A8U0P7W9	5.3e-08	36.3	0	1.1e-07	35.4	0	1.5	1	IPR000210(59...165)	unreviewed	BTB domain-containing protein	609	PF00651	59..164
	Salvelinus namaycush	Chordata	Craniata	Actinopteri	Salmoniformes	8040	A0A8U1BM04	5.5e-08	36.3	0	1.1e-07	35.4	0	1.5	1	IPR000210(73...179)	unreviewed	BTB domain-containing protein	622	PF00651	73..178
	Salvelinus namaycush	Chordata	Craniata	Actinopteri	Salmoniformes	8040	A0A8U1BUS6	5.4e-08	36.3	0	1.1e-07	35.4	0	1.5	1	IPR000210(65...171)	unreviewed	BTB domain-containing protein	615	PF00651	65..170
	Salvelinus namaycush	Chordata	Craniata	Actinopteri	Salmoniformes	8040	A0A8U1C0N0	5.3e-08	36.3	0	1.1e-07	35.4	0	1.5	1	IPR000210(59...165)	unreviewed	BTB domain-containing protein	609	PF00651	59..164
	Salvelinus namaycush	Chordata	Craniata	Actinopteri	Salmoniformes	8040	A0A8U1C3D4	5.5e-08	36.3	0	1.1e-07	35.3	0	1.5	1	IPR000210(73...179)	unreviewed	BTB domain-containing protein	623	PF00651	73..178
	Salvelinus namaycush	Chordata	Craniata	Actinopteri	Salmoniformes	8040	A0A8U1EVD3	4.3e-08	36.7	1.1	1.1e-07	35.3	0.3	2.1	1	IPR000210(30...137)	unreviewed	BTB domain-containing protein	590	PF00651	30..136
	Salvelinus namaycush	Chordata	Craniata	Actinopteri	Salmoniformes	8040	A0A8U1H0A9	4.3e-08	36.7	1.1	1.1e-07	35.3	0.3	2.1	1	IPR000210(31...138)	unreviewed	BTB domain-containing protein	591	PF00651	31..137
	Salvelinus namaycush	Chordata	Craniata	Actinopteri	Salmoniformes	8040	A0A8U1H0R9	4.4e-08	36.6	1.1	1.1e-07	35.3	0.3	2.1	1	IPR000210(31...138)	unreviewed	BTB domain-containing protein	601	PF00651	31..137
	Sander lucioperca	Chordata	Craniata	Actinopteri	Perciformes	283035	A0A8C9Z8G6	5.3e-08	36.3	0	1.1e-07	35.4	0	1.5	1	IPR000210(59...165)	unreviewed	BTB domain-containing protein	609	PF00651	59..164
	Sander lucioperca	Chordata	Craniata	Actinopteri	Perciformes	283035	A0A8C9Z8K0	5.3e-08	36.4	0	1.1e-07	35.4	0	1.5	1	IPR000210(55...161)	unreviewed	BTB domain-containing protein	605	PF00651	55..160
	Sapajus apella	Chordata	Craniata	Mammalia	Primates	9515	A0A6J3IXV9	5.3e-08	36.3	0	1.1e-07	35.4	0	1.5	1	IPR000210(59...165)	unreviewed	BTB domain-containing protein	609	PF00651	59..164
	Sarcophilus harrisii	Chordata	Craniata	Mammalia	Dasyuromorphia	9305	A0A7N4V4V8	5.4e-08	36.3	0	1.1e-07	35.3	0	1.5	1	IPR000210(59...165)	unreviewed	BTB domain-containing protein	641	PF00651	59..164
	Sarcophilus harrisii	Chordata	Craniata	Mammalia	Dasyuromorphia	9305	G3VQ16	5.3e-08	36.3	0	1.1e-07	35.4	0	1.5	1	IPR000210(59...165)	unreviewed	BTB domain-containing protein	609	PF00651	59..164
	Sciurus vulgaris	Chordata	Craniata	Mammalia	Rodentia	55149	A0A8D2DI82	5.3e-08	36.3	0	1.1e-07	35.4	0	1.5	1	IPR000210(59...165)	unreviewed	BTB domain-containing protein	609	PF00651	59..164
	Scleropages formosus	Chordata	Craniata	Actinopteri	Osteoglossiformes	113540	A0A0P7UBI3	5.6e-08	36.3	0	1.1e-07	35.3	0	1.5	1	IPR000210(54...160)	unreviewed	BTB domain-containing protein	642	PF00651	54..159
	Scleropages formosus	Chordata	Craniata	Actinopteri	Osteoglossiformes	113540	A0A8C9S544	5.3e-08	36.3	0	1.1e-07	35.4	0	1.5	1	IPR000210(59...165)	unreviewed	BTB domain-containing protein	609	PF00651	59..164
	Scleropages formosus	Chordata	Craniata	Actinopteri	Osteoglossiformes	113540	A0A8C9TRL4	4.3e-08	36.7	1.1	1.1e-07	35.3	0.3	2.1	1	IPR000210(31...137)	unreviewed	BTB domain-containing protein	590	PF00651	31..136
	Scophthalmus maximus	Chordata	Craniata	Actinopteri	Pleuronectiformes	52904	A0A6A4TY47	5.3e-08	36.3	0	1.1e-07	35.3	0	1.5	1	IPR000210(41...147)	unreviewed	BTB domain-containing protein	623	PF00651	41..146
	Scophthalmus maximus	Chordata	Craniata	Actinopteri	Pleuronectiformes	52904	A0A8D3B820	4.3e-08	36.7	1.1	1.1e-07	35.3	0.3	2.1	1	IPR000210(31...138)	unreviewed	BTB domain-containing protein	591	PF00651	31..137
	Scophthalmus maximus	Chordata	Craniata	Actinopteri	Pleuronectiformes	52904	A0A8D3BWK3	5.4e-08	36.3	0	1.1e-07	35.4	0	1.5	1	IPR000210(59...165)	unreviewed	BTB domain-containing protein	606	PF00651	59..164
	Scophthalmus maximus	Chordata	Craniata	Actinopteri	Pleuronectiformes	52904	A0A8D3BY24	5.7e-08	36.3	0	1.1e-07	35.3	0	1.5	1	IPR000210(59...165)	unreviewed	BTB domain-containing protein	645	PF00651	59..164
	Scyliorhinus torazame	Chordata	Craniata	Chondrichthyes	Carcharhiniformes	75743	A0A401P3N8	5.1e-08	36.4	0	1.1e-07	35.4	0	1.5	1	IPR000210(59...165)	unreviewed	BTB domain-containing protein	609	PF00651	59..164
	Serinus canaria	Chordata	Craniata	Aves	Passeriformes	9135	A0A8C9KYQ6	5.3e-08	36.4	0	1.1e-07	35.4	0	1.5	1	IPR000210(59...165)	unreviewed	BTB domain-containing protein	618	PF00651	59..164
	Seriola dumerili	Chordata	Craniata	Actinopteri	Carangiformes	41447	A0A3B4TY40	4.3e-08	36.6	1.1	1.1e-07	35.3	0.3	2.1	1	IPR000210(31...138)	unreviewed	BTB domain-containing protein	591	PF00651	31..137
	Seriola dumerili	Chordata	Craniata	Actinopteri	Carangiformes	41447	A0A3B4UAB3	5.3e-08	36.3	0	1.1e-07	35.4	0	1.5	1	IPR000210(59...165)	unreviewed	BTB domain-containing protein	609	PF00651	59..164
	Seriola lalandi	Chordata	Craniata	Actinopteri	Carangiformes	1841481	A0A3B4WJ48	4.3e-08	36.6	1.1	1.1e-07	35.3	0.3	2.1	1	IPR000210(31...138)	unreviewed	BTB domain-containing protein	591	PF00651	31..137
	Seriola lalandi	Chordata	Craniata	Actinopteri	Carangiformes	1841481	A0A3B4YDC5	5.3e-08	36.3	0	1.1e-07	35.4	0	1.5	1	IPR000210(59...165)	unreviewed	BTB domain-containing protein	609	PF00651	59..164
	Silurus meridionalis	Chordata	Craniata	Actinopteri	Siluriformes	175797	A0A8T0BG01	5.7e-08	36.3	0	1.1e-07	35.3	0	1.5	1	IPR000210(87...193)	unreviewed	BTB domain-containing protein	637	PF00651	87..192
	Sinocyclocheilus anshuiensis	Chordata	Craniata	Actinopteri	Cypriniformes	1608454	A0A671ME88	4.4e-08	36.6	1.1	1.1e-07	35.3	0.3	2	1	IPR000210(41...148)	unreviewed	BTB domain-containing protein	592	PF00651	41..138
	Sinocyclocheilus anshuiensis	Chordata	Craniata	Actinopteri	Cypriniformes	1608454	A0A671RSD0	5.2e-08	36.4	0	1.1e-07	35.4	0	1.5	1	IPR000210(56...162)	unreviewed	BTB domain-containing protein	605	PF00651	56..161
	Sinocyclocheilus anshuiensis	Chordata	Craniata	Actinopteri	Cypriniformes	1608454	A0A671RT61	5.2e-08	36.4	0	1.1e-07	35.4	0	1.5	1	IPR000210(59...165)	unreviewed	BTB domain-containing protein	608	PF00651	59..164
	Sinocyclocheilus grahami	Chordata	Craniata	Actinopteri	Cypriniformes	75366	A0A672MZ12	5.2e-08	36.4	0	1.1e-07	35.4	0	1.5	1	IPR000210(54...160)	unreviewed	BTB domain-containing protein	604	PF00651	54..159
	Sinocyclocheilus grahami	Chordata	Craniata	Actinopteri	Cypriniformes	75366	A0A672N2I9	5.3e-08	36.4	0	1.1e-07	35.4	0	1.5	1	IPR000210(53...159)	unreviewed	BTB domain-containing protein	603	PF00651	53..158
	Sinocyclocheilus grahami	Chordata	Craniata	Actinopteri	Cypriniformes	75366	A0A672P7W6	4.3e-08	36.6	1.1	1.1e-07	35.3	0.3	2.1	1	IPR000210(31...138)	unreviewed	BTB domain-containing protein	591	PF00651	31..137
	Sinocyclocheilus grahami	Chordata	Craniata	Actinopteri	Cypriniformes	75366	A0A672PDC5	5.3e-08	36.4	0	1.1e-07	35.4	0	1.5	1	IPR000210(55...161)	unreviewed	BTB domain-containing protein	605	PF00651	55..160
	Sinocyclocheilus grahami	Chordata	Craniata	Actinopteri	Cypriniformes	75366	A0A672PE14	5.4e-08	36.3	0	1.1e-07	35.4	0	1.5	1	IPR000210(69...175)	unreviewed	BTB domain-containing protein	619	PF00651	69..174
	Sinocyclocheilus grahami	Chordata	Craniata	Actinopteri	Cypriniformes	75366	A0A672PFJ0	5.3e-08	36.3	0	1.1e-07	35.4	0	1.5	1	IPR000210(57...163)	unreviewed	BTB domain-containing protein	607	PF00651	57..162
	Sinocyclocheilus grahami	Chordata	Craniata	Actinopteri	Cypriniformes	75366	A0A672PFJ9	5.3e-08	36.4	0	1.1e-07	35.4	0	1.5	1	IPR000210(55...161)	unreviewed	BTB domain-containing protein	605	PF00651	55..160
	Sinocyclocheilus rhinocerous	Chordata	Craniata	Actinopteri	Cypriniformes	307959	A0A673FQX7	5.3e-08	36.4	0	1.1e-07	35.4	0	1.5	1	IPR000210(55...161)	unreviewed	BTB domain-containing protein	605	PF00651	55..160
	Sinocyclocheilus rhinocerous	Chordata	Craniata	Actinopteri	Cypriniformes	307959	A0A673FTK6	5.4e-08	36.3	0	1.1e-07	35.4	0	1.5	1	IPR000210(60...166)	unreviewed	BTB domain-containing protein	610	PF00651	60..165
	Sinocyclocheilus rhinocerous	Chordata	Craniata	Actinopteri	Cypriniformes	307959	A0A673KIE3	1e-07	35.4	7.2	1.1e-07	35.4	0.3	3.1	1	IPR000210(25...134)	unreviewed	BTB domain-containing protein	140	PF00651	25..129
	Sinocyclocheilus rhinocerous	Chordata	Craniata	Actinopteri	Cypriniformes	307959	A0A673LD90	4.4e-08	36.6	1.1	1.1e-07	35.3	0.3	2.1	1	IPR000210(41...148)	unreviewed	BTB domain-containing protein	601	PF00651	41..147
	Sinocyclocheilus rhinocerous	Chordata	Craniata	Actinopteri	Cypriniformes	307959	A0A673LKJ8	3.9e-08	36.8	1.1	1.1e-07	35.4	0.3	2.1	1	IPR000210(50...157)	unreviewed	BTB domain-containing protein	563	PF00651	50..156
	Sinocyclocheilus rhinocerous	Chordata	Craniata	Actinopteri	Cypriniformes	307959	A0A673M353	6.5e-08	36.1	0.3	1.1e-07	35.3	0.3	1.4	1	IPR000210(52...159)	unreviewed	BTB domain-containing protein	606	PF00651	52..158
	Sparus aurata	Chordata	Craniata	Actinopteri	Spariformes	8175	A0A671U2H9	4.5e-08	36.6	1.1	1.1e-07	35.3	0.3	2.1	1	IPR000210(44...151)	unreviewed	BTB domain-containing protein	605	PF00651	44..150
	Sparus aurata	Chordata	Craniata	Actinopteri	Spariformes	8175	A0A671U2I5	4.3e-08	36.6	1.1	1.1e-07	35.3	0.3	2.1	1	IPR000210(31...138)	unreviewed	BTB domain-containing protein	592	PF00651	31..137
	Sparus aurata	Chordata	Craniata	Actinopteri	Spariformes	8175	A0A671WPI9	5.3e-08	36.3	0	1.1e-07	35.4	0	1.5	1	IPR000210(59...165)	unreviewed	BTB domain-containing protein	609	PF00651	59..164
	Spermophilus dauricus	Chordata	Craniata	Mammalia	Rodentia	99837	A0A8C9PZE6	5.3e-08	36.4	0	1.1e-07	35.4	0	1.5	1	IPR000210(54...160)	unreviewed	BTB domain-containing protein	604	PF00651	54..159
	Sphaeramia orbicularis	Chordata	Craniata	Actinopteri	Kurtiformes	375764	A0A673CGT4	5.3e-08	36.4	0	1.1e-07	35.4	0	1.5	1	IPR000210(54...160)	unreviewed	BTB domain-containing protein	604	PF00651	54..159
	Sphaeramia orbicularis	Chordata	Craniata	Actinopteri	Kurtiformes	375764	A0A673CL45	5.4e-08	36.3	0	1.1e-07	35.4	0	1.5	1	IPR000210(63...169)	unreviewed	BTB domain-containing protein	613	PF00651	63..168
	Sphenodon punctatus	Chordata	Craniata	Lepidosauria	Sphenodontia	8508	A0A8D0HRG1	5.3e-08	36.3	0	1.1e-07	35.4	0	1.5	1	IPR000210(59...165)	unreviewed	BTB domain-containing protein	609	PF00651	59..164
	Stegastes partitus	Chordata	Craniata	Actinopteri		144197	A0A3B5A6V8	4.3e-08	36.6	1.1	1.1e-07	35.3	0.3	2.1	1	IPR000210(31...138)	unreviewed	BTB domain-containing protein	597	PF00651	31..137
	Stegastes partitus	Chordata	Craniata	Actinopteri		144197	A0A3B5AXA8	5.5e-08	36.3	0	1.1e-07	35.4	0	1.5	1	IPR000210(72...178)	unreviewed	BTB domain-containing protein	622	PF00651	72..177
	Stegastes partitus	Chordata	Craniata	Actinopteri		144197	A0A9Y4K7P3	5.3e-08	36.3	0	1.1e-07	35.4	0	1.5	1	IPR000210(59...165)	unreviewed	BTB domain-containing protein	609	PF00651	59..164
	Stegastes partitus	Chordata	Craniata	Actinopteri		144197	A0A9Y4K8U1	4.3e-08	36.6	1.1	1.1e-07	35.3	0.3	2.1	1	IPR000210(31...138)	unreviewed	BTB domain-containing protein	591	PF00651	31..137
	Strix occidentalis	Chordata	Craniata	Aves	Strigiformes	311401	A0A8D0EGB8	5.3e-08	36.4	0	1.1e-07	35.4	0	1.5	1	IPR000210(55...161)	unreviewed	BTB domain-containing protein	605	PF00651	55..160
	Suricata suricatta	Chordata	Craniata	Mammalia	Carnivora	37032	A0A673T7L2	5.3e-08	36.3	0	1.1e-07	35.4	0	1.5	1	IPR000210(59...165)	unreviewed	BTB domain-containing protein	609	PF00651	59..164
	Sus scrofa	Chordata	Craniata	Mammalia	Artiodactyla	9823	A0A480TKR3	5.3e-08	36.3	0	1.1e-07	35.4	0	1.5	1	IPR000210(59...165)	unreviewed	BTB domain-containing protein	609	PF00651	59..164
	Sus scrofa	Chordata	Craniata	Mammalia	Artiodactyla	9823	A0A4X1UCA1	5.3e-08	36.3	0	1.1e-07	35.4	0	1.5	1	IPR000210(59...165)	unreviewed	BTB domain-containing protein	608	PF00651	59..164
	Sus scrofa	Chordata	Craniata	Mammalia	Artiodactyla	9823	A0A8D0LUA9	5.6e-08	36.3	0	1.1e-07	35.3	0	1.5	1	IPR000210(87...193)	unreviewed	BTB domain-containing protein	637	PF00651	87..192
	Sus scrofa	Chordata	Craniata	Mammalia	Artiodactyla	9823	A0A8D0S3E2	4.4e-08	36.6	0.2	1.1e-07	35.4	0.2	1.6	1	IPR000210(40...147)	unreviewed	BTB domain-containing protein	393	PF00651	40..146
	Sus scrofa	Chordata	Craniata	Mammalia	Artiodactyla	9823	A0A8D0Y512	5.3e-08	36.4	0	1.1e-07	35.4	0	1.5	1	IPR000210(59...165)	unreviewed	BTB domain-containing protein	607	PF00651	59..164
	Tachysurus vachellii	Chordata	Craniata	Actinopteri	Siluriformes	175792	A0AA88NQT8	5.6e-08	36.3	0	1.1e-07	35.3	0	1.5	1	IPR000210(80...186)	unreviewed	BTB domain-containing protein	630	PF00651	80..185
	Taeniopygia guttata	Chordata	Craniata	Aves	Passeriformes	59729	A0A674GLI9	5.3e-08	36.3	0	1.1e-07	35.4	0	1.5	1	IPR000210(59...165)	unreviewed	BTB domain-containing protein	609	PF00651	59..164
	Taeniopygia guttata	Chordata	Craniata	Aves	Passeriformes	59729	A0A674GNE2	5.3e-08	36.4	0	1.1e-07	35.4	0	1.5	1	IPR000210(59...165)	unreviewed	BTB domain-containing protein	607	PF00651	59..164
	Taeniopygia guttata	Chordata	Craniata	Aves	Passeriformes	59729	H0Z0N9	4.3e-08	36.6	1.1	1.1e-07	35.3	0.3	2.1	1	IPR000210(30...137)	unreviewed	BTB domain-containing protein	590	PF00651	30..136
	Taeniopygia guttata	Chordata	Craniata	Aves	Passeriformes	59729	H1A3Z5	5.3e-08	36.4	0	1.1e-07	35.4	0	1.5	1	IPR000210(59...165)	unreviewed	BTB domain-containing protein	618	PF00651	59..164
	Takifugu bimaculatus	Chordata	Craniata	Actinopteri	Tetraodontiformes	433685	A0A4Z2B5C9	5.5e-08	36.3	0.3	1.1e-07	35.3	0.3	1.6	1	IPR000210(31...138)	unreviewed	BTB domain-containing protein	591	PF00651	31..137
	Takifugu flavidus	Chordata	Craniata	Actinopteri	Tetraodontiformes	433684	A0A5C6MNX3	5.6e-08	36.3	0.3	1.1e-07	35.3	0.3	1.6	1	IPR000210(30...137)	unreviewed	BTB domain-containing protein	596	PF00651	30..136
	Takifugu rubripes	Chordata	Craniata	Actinopteri	Tetraodontiformes	31033	A0A674MHB5	5.4e-08	36.3	0.3	1.1e-07	35.3	0.3	1.6	1	IPR000210(47...154)	unreviewed	BTB domain-containing protein	583	PF00651	47..153
	Takifugu rubripes	Chordata	Craniata	Actinopteri	Tetraodontiformes	31033	A0A674MX65	5.5e-08	36.3	0.3	1.1e-07	35.3	0.3	1.6	1	IPR000210(31...138)	unreviewed	BTB domain-containing protein	591	PF00651	31..137
	Takifugu rubripes	Chordata	Craniata	Actinopteri	Tetraodontiformes	31033	A0A674PAB6	5.3e-08	36.3	0	1.1e-07	35.4	0	1.5	1	IPR000210(59...165)	unreviewed	BTB domain-containing protein	608	PF00651	59..164
	Takifugu rubripes	Chordata	Craniata	Actinopteri	Tetraodontiformes	31033	H2T0D5	5.4e-08	36.3	0	1.1e-07	35.3	0	1.5	1	IPR000210(59...165)	unreviewed	BTB domain-containing protein	632	PF00651	59..164
	Terrapene carolina	Chordata	Craniata		Testudines	2587831	A0A674IQP9	5.3e-08	36.3	0	1.1e-07	35.4	0	1.5	1	IPR000210(59...165)	unreviewed	BTB domain-containing protein	609	PF00651	59..164
	Tetraodon nigroviridis	Chordata	Craniata	Actinopteri	Tetraodontiformes	99883	H3DCH1	4.3e-08	36.6	1.1	1.1e-07	35.3	0.3	2.1	1	IPR000210(30...137)	unreviewed	BTB domain-containing protein	590	PF00651	30..136
	Tetraodon nigroviridis	Chordata	Craniata	Actinopteri	Tetraodontiformes	99883	Q4RVQ4	4.1e-08	36.7	1.1	1.1e-07	35.4	0.3	2.1	1	IPR000210(31...138)	unreviewed	BTB domain-containing protein	573	PF00651	31..137
	Thamnophis sirtalis	Chordata	Craniata	Lepidosauria	Squamata	35019	A0A6I9X1I8	5.4e-08	36.3	0	1.1e-07	35.4	0	1.5	1	IPR000210(59...165)	unreviewed	BTB domain-containing protein	618	PF00651	59..164
	Thamnophis sirtalis	Chordata	Craniata	Lepidosauria	Squamata	35019	A0A6I9X8T5	5.3e-08	36.3	0	1.1e-07	35.4	0	1.5	1	IPR000210(59...165)	unreviewed	BTB domain-containing protein	609	PF00651	59..164
	Thamnophis sirtalis	Chordata	Craniata	Lepidosauria	Squamata	35019	A0A6I9YV73	4.2e-08	36.7	1.1	1.1e-07	35.3	0.3	2.1	1	IPR000210(30...137)	unreviewed	BTB domain-containing protein	590	PF00651	30..136
	Theropithecus gelada	Chordata	Craniata	Mammalia	Primates	9565	A0A8D2JVR6	5.3e-08	36.3	0	1.1e-07	35.4	0	1.5	1	IPR000210(59...165)	unreviewed	BTB domain-containing protein	609	PF00651	59..164
	Trichechus manatus	Chordata	Craniata	Mammalia	Sirenia	127582	A0A2Y9DE19	5.3e-08	36.3	0	1.1e-07	35.4	0	1.5	1	IPR000210(59...165)	unreviewed	BTB domain-containing protein	609	PF00651	59..164
	Triplophysa tibetana	Chordata	Craniata	Actinopteri	Cypriniformes	1572043	A0A5A9NF64	6.3e-08	36.1	2.2	1.1e-07	35.3	0.7	2.1	1	IPR000210(30...137)	unreviewed	BTB domain-containing protein	560	PF00651	30..136
	Tursiops truncatus	Chordata	Craniata	Mammalia	Artiodactyla	9739	A0A2U4CQB4	5.3e-08	36.3	0	1.1e-07	35.4	0	1.5	1	IPR000210(59...165)	unreviewed	BTB domain-containing protein	609	PF00651	59..164
	Urocitellus parryii	Chordata	Craniata	Mammalia	Rodentia	9999	A0A8D2GNI7	5.5e-08	36.3	0	1.1e-07	35.3	0	1.5	1	IPR000210(59...165)	unreviewed	BTB domain-containing protein	627	PF00651	59..164
	Urocitellus parryii	Chordata	Craniata	Mammalia	Rodentia	9999	A0A8D2GRT8	5.3e-08	36.3	0	1.1e-07	35.4	0	1.5	1	IPR000210(59...165)	unreviewed	BTB domain-containing protein	609	PF00651	59..164
	Ursus maritimus	Chordata	Craniata	Mammalia	Carnivora	29073	A0A384CIN9	5.3e-08	36.3	0	1.1e-07	35.4	0	1.5	1	IPR000210(59...165)	unreviewed	BTB domain-containing protein	609	PF00651	59..164
	Varanus komodoensis	Chordata	Craniata	Lepidosauria	Squamata	61221	A0A8D2L6I2	5.3e-08	36.4	0	1.1e-07	35.4	0	1.5	1	IPR000210(68...174)	unreviewed	BTB domain-containing protein	618	PF00651	68..173
	Vicugna pacos	Chordata	Craniata	Mammalia	Artiodactyla	30538	A0A6I9IGD5	5.3e-08	36.3	0	1.1e-07	35.4	0	1.5	1	IPR000210(59...165)	unreviewed	BTB domain-containing protein	609	PF00651	59..164
	Vombatus ursinus	Chordata	Craniata	Mammalia	Diprotodontia	29139	A0A4X2K5Y6	5.3e-08	36.3	0	1.1e-07	35.4	0	1.5	1	IPR000210(59...165)	unreviewed	BTB domain-containing protein	609	PF00651	59..164
	Vulpes vulpes	Chordata	Craniata	Mammalia	Carnivora	9627	A0A3Q7T8M4	5.3e-08	36.3	0	1.1e-07	35.4	0	1.5	1	IPR000210(59...165)	unreviewed	BTB domain-containing protein	609	PF00651	59..164
	Xenopus laevis	Chordata	Craniata	Amphibia	Anura	8355	A0A1L8GGC8	5.3e-08	36.3	0	1.1e-07	35.4	0	1.5	1	IPR000210(59...165)	unreviewed	BTB domain-containing protein	609	PF00651	59..164
	Xenopus laevis	Chordata	Craniata	Amphibia	Anura	8355	A0A8J0VBY3	5.3e-08	36.4	0	1.1e-07	35.4	0	1.5	1	IPR000210(58...164)	unreviewed	BTB domain-containing protein	608	PF00651	58..163
	Xenopus laevis	Chordata	Craniata	Amphibia	Anura	8355	A0A974D0R2	5.3e-08	36.3	0	1.1e-07	35.4	0	1.5	1	IPR000210(59...165)	unreviewed	BTB domain-containing protein	609	PF00651	59..164
	Xenopus laevis	Chordata	Craniata	Amphibia	Anura	8355	A0A974D6P4	5.3e-08	36.4	0	1.1e-07	35.4	0	1.5	1	IPR000210(54...160)	unreviewed	BTB domain-containing protein	604	PF00651	54..159
	Xenopus laevis	Chordata	Craniata	Amphibia	Anura	8355	Q6DFF6	5.3e-08	36.4	0	1.1e-07	35.4	0	1.5	1	IPR000210(54...160)	reviewed	Kelch-like protein 20	604	PF00651	54..159
	Xenopus tropicalis	Chordata	Craniata	Amphibia	Anura	8364	A0A6I8RPX1	5.3e-08	36.4	0	1.1e-07	35.4	0	1.5	1	IPR000210(58...164)	unreviewed	BTB domain-containing protein	608	PF00651	58..163
	Xenopus tropicalis	Chordata	Craniata	Amphibia	Anura	8364	A0A6I8SZ54	5.3e-08	36.3	0	1.1e-07	35.4	0	1.5	1	IPR000210(58...164)	unreviewed	BTB domain-containing protein	608	PF00651	58..163
	Xiphophorus couchianus	Chordata	Craniata	Actinopteri	Cyprinodontiformes	32473	A0A3B5L198	4.4e-08	36.6	1.1	1.1e-07	35.3	0.3	2.1	1	IPR000210(31...138)	unreviewed	BTB domain-containing protein	591	PF00651	31..137
	Xiphophorus couchianus	Chordata	Craniata	Actinopteri	Cyprinodontiformes	32473	A0A3B5LIN1	5.3e-08	36.3	0	1.1e-07	35.4	0	1.5	1	IPR000210(59...165)	unreviewed	BTB domain-containing protein	609	PF00651	59..164
	Xiphophorus maculatus	Chordata	Craniata	Actinopteri	Cyprinodontiformes	8083	A0A3B5REV7	4.4e-08	36.6	1.1	1.1e-07	35.3	0.3	2.1	1	IPR000210(31...138)	unreviewed	BTB domain-containing protein	591	PF00651	31..137
	Xiphophorus maculatus	Chordata	Craniata	Actinopteri	Cyprinodontiformes	8083	M4AVK2	5.3e-08	36.3	0	1.1e-07	35.4	0	1.5	1	IPR000210(59...165)	unreviewed	BTB domain-containing protein	609	PF00651	59..164
	Zalophus californianus	Chordata	Craniata	Mammalia	Carnivora	9704	A0A6J2EN73	5.3e-08	36.3	0	1.1e-07	35.4	0	1.5	1	IPR000210(59...165)	unreviewed	BTB domain-containing protein	609	PF00651	59..164
	Zonotrichia albicollis	Chordata	Craniata	Aves	Passeriformes	44394	A0A8D2MEX7	5.3e-08	36.4	0	1.1e-07	35.4	0	1.5	1	IPR000210(59...165)	unreviewed	BTB domain-containing protein	618	PF00651	59..164
	Albula goreensis	Chordata	Craniata	Actinopteri	Albuliformes	1534307	A0A8T3D5F9	4.5e-08	36.6	1.1	1.2e-07	35.3	0.3	2.1	1	IPR000210(49...156)	unreviewed	BTB domain-containing protein	609	PF00651	49..155
	Alligator mississippiensis	Chordata	Craniata		Crocodylia	8496	A0A151MIH7	5.9e-08	36.2	0	1.2e-07	35.2	0	1.5	1	IPR000210(87...193)	unreviewed	BTB domain-containing protein	674	PF00651	87..192
	Alligator mississippiensis	Chordata	Craniata		Crocodylia	8496	A0A151MIN6	6.1e-08	36.2	0	1.2e-07	35.2	0	1.5	1	IPR000210(87...193)	unreviewed	BTB domain-containing protein	677	PF00651	87..192
	Ameiurus melas	Chordata	Craniata	Actinopteri	Siluriformes	219545	A0A7J6B7S7	5.8e-08	36.2	0	1.2e-07	35.2	0	1.5	1	IPR000210(122...228)	unreviewed	BTB domain-containing protein	672	PF00651	122..227
	Amphiprion ocellaris	Chordata	Craniata	Actinopteri		80972	A0A3Q1CUD1	4.5e-08	36.6	1.1	1.2e-07	35.2	0.3	2.1	1	IPR000210(56...163)	unreviewed	BTB domain-containing protein	628	PF00651	56..162
	Amphiprion percula	Chordata	Craniata	Actinopteri		161767	A0A3P8TZF1	4.5e-08	36.6	1.1	1.2e-07	35.2	0.3	2.1	1	IPR000210(56...163)	unreviewed	BTB domain-containing protein	628	PF00651	56..162
	Anabas testudineus	Chordata	Craniata	Actinopteri	Anabantiformes	64144	A0A3Q1K524	4.5e-08	36.6	1.1	1.2e-07	35.3	0.3	2.1	1	IPR000210(56...163)	unreviewed	BTB domain-containing protein	613	PF00651	56..162
	Anas zonorhyncha	Chordata	Craniata	Aves	Anseriformes	75864	A0A8B9VKW7	4.6e-08	36.6	1.1	1.2e-07	35.3	0.3	2.1	1	IPR000210(53...160)	unreviewed	BTB domain-containing protein	613	PF00651	53..159
	Anolis carolinensis	Chordata	Craniata	Lepidosauria	Squamata	28377	H9G599	4.6e-08	36.5	1.1	1.2e-07	35.3	0.3	2.1	1	IPR000210(54...161)	unreviewed	BTB domain-containing protein	614	PF00651	54..160
	Apteryx owenii	Chordata	Craniata	Aves	Apterygiformes	8824	A0A8B9PVV6	5.8e-08	36.2	0	1.2e-07	35.3	0	1.5	1	IPR000210(74...180)	unreviewed	BTB domain-containing protein	656	PF00651	74..179
	Aquarana catesbeiana	Chordata	Craniata	Amphibia	Anura	8400	A0A2G9RAQ0	3.2e-08	37	0.5	1.2e-07	35.2	0.5	1.9	1	IPR000210(25...131)	unreviewed	Zinc finger and BTB domain-containing protein 14	355	PF00651	25..128
	Asarcornis scutulata	Chordata	Craniata	Aves	Anseriformes	75869	A0A7K7KWF5	6.8e-08	36	2.1	1.2e-07	35.3	0.7	2.1	1	IPR000210(34...140)	unreviewed	BTB domain-containing protein	594	PF00651	34..139
	Astatotilapia calliptera	Chordata	Craniata	Actinopteri	Cichliformes	8154	A0A3P8RAW7	4.6e-08	36.5	1.1	1.2e-07	35.2	0.3	2.1	1	IPR000210(66...173)	unreviewed	BTB domain-containing protein	626	PF00651	66..172
	Atlantisia rogersi	Chordata	Craniata	Aves	Gruiformes	2478892	A0A7L3WFX8	6.8e-08	36	2.1	1.2e-07	35.3	0.7	2.1	1	IPR000210(34...140)	unreviewed	BTB domain-containing protein	593	PF00651	34..139
	Austrofundulus limnaeus	Chordata	Craniata	Actinopteri	Cyprinodontiformes	52670	A0A2I4BTW9	4.6e-08	36.5	1.1	1.2e-07	35.2	0.3	2.1	1	IPR000210(59...166)	unreviewed	BTB domain-containing protein	625	PF00651	59..165
	Aythya fuligula	Chordata	Craniata	Aves	Anseriformes	219594	A0A6J3CG63	3.4e-08	37	0.3	1.2e-07	35.3	0.5	1.8	1	IPR000210(26...132)	unreviewed	Zinc finger and BTB domain-containing protein 14 isoform X4	349	PF00651	26..129
	Aythya fuligula	Chordata	Craniata	Aves	Anseriformes	219594	A0A6J3CHT0	3.6e-08	36.9	0.3	1.2e-07	35.2	0.5	1.8	1	IPR000210(26...132)	unreviewed	Zinc finger and BTB domain-containing protein 14 isoform X3	359	PF00651	26..129
	Aythya fuligula	Chordata	Craniata	Aves	Anseriformes	219594	A0A6J3CIT6	3.6e-08	36.9	0.3	1.2e-07	35.2	0.5	1.8	1	IPR000210(26...132)	unreviewed	Zinc finger and BTB domain-containing protein 14 isoform X2	360	PF00651	26..129
	Bos indicus	Chordata	Craniata	Mammalia	Artiodactyla	30522	A0A4W2EKJ7	5.8e-08	36.2	0	1.2e-07	35.3	0	1.5	1	IPR000210(112...218)	unreviewed	BTB domain-containing protein	662	PF00651	112..217
	Callorhinchus milii	Chordata	Craniata	Chondrichthyes	Chimaeriformes	7868	A0A4W3I1F3	7e-08	36	0.6	1.2e-07	35.2	0.6	1.4	1	IPR000210(60...145)	unreviewed	BTB domain-containing protein	145	PF00651	60..144
	Callorhinchus milii	Chordata	Craniata	Chondrichthyes	Chimaeriformes	7868	V9LA89	6e-08	36.2	0.5	1.2e-07	35.2	0.5	1.5	1	IPR000210(20...126)	unreviewed	BTB domain-containing protein	240	PF00651	20..122
	Camelus dromedarius	Chordata	Craniata	Mammalia	Artiodactyla	9838	A0A5N4CPV8	5.7e-08	36.2	0	1.2e-07	35.3	0	1.5	1	IPR000210(75...181)	unreviewed	BTB domain-containing protein	659	PF00651	75..180
	Casuarius casuarius	Chordata	Craniata	Aves	Casuariiformes	8787	A0A7K8NRL2	6.8e-08	36	2.1	1.2e-07	35.3	0.7	2.1	1	IPR000210(34...140)	unreviewed	BTB domain-containing protein	593	PF00651	34..139
	Centropus bengalensis	Chordata	Craniata	Aves	Cuculiformes	1463675	A0A852M7G0	6.8e-08	36	2.1	1.2e-07	35.3	0.7	2.1	1	IPR000210(34...140)	unreviewed	BTB domain-containing protein	593	PF00651	34..139
	Centropus unirufus	Chordata	Craniata	Aves	Cuculiformes	1118519	A0A7K4ZMN5	6.8e-08	36	2.1	1.2e-07	35.3	0.7	2.1	1	IPR000210(34...140)	unreviewed	BTB domain-containing protein	593	PF00651	34..139
	Chlorella vulgaris	Chlorophyta		Trebouxiophyceae	Chlorellales	3077	A0A9D4TMG6	4e-08	36.7	0.1	1.2e-07	35.2	0.1	1.8	1	IPR000210(24...142)	unreviewed	BTB domain-containing protein	665	PF00651	24..141
	Clarias magur	Chordata	Craniata	Actinopteri	Siluriformes	1594786	A0A8J4XDN5	4.4e-08	36.6	1.1	1.2e-07	35.2	0.3	2.1	1	IPR000210(62...169)	unreviewed	BTB domain-containing protein	622	PF00651	62..168
	Clupea harengus	Chordata	Craniata	Actinopteri	Clupeiformes	7950	A0A6P3VUH6	4.8e-08	36.5	1.1	1.2e-07	35.2	0.3	2.1	1	IPR000210(90...197)	unreviewed	BTB domain-containing protein	650	PF00651	90..196
	Columba livia	Chordata	Craniata	Aves	Columbiformes	8932	A0A2I0M325	4.7e-08	36.5	1.1	1.2e-07	35.2	0.3	2.1	1	IPR000210(68...175)	unreviewed	BTB domain-containing protein	628	PF00651	68..174
	Cottoperca gobio	Chordata	Craniata	Actinopteri	Perciformes	56716	A0A6J2PZV4	4.8e-08	36.5	1.1	1.2e-07	35.2	0.3	2.1	1	IPR000210(73...180)	unreviewed	BTB domain-containing protein	633	PF00651	73..179
	Cottoperca gobio	Chordata	Craniata	Actinopteri	Perciformes	56716	A0A6J2Q0U2	4.9e-08	36.5	1.1	1.2e-07	35.2	0.3	2.1	1	IPR000210(73...180)	unreviewed	BTB domain-containing protein	639	PF00651	73..179
	Coturnix japonica	Chordata	Craniata	Aves	Galliformes	93934	A0A8C2UIB1	6.2e-08	36.1	0	1.2e-07	35.2	0	1.5	1	IPR000210(141...247)	unreviewed	BTB domain-containing protein	691	PF00651	141..246
	Crotophaga sulcirostris	Chordata	Craniata	Aves	Cuculiformes	33598	A0A7K5I3A6	7.2e-08	35.9	2.1	1.2e-07	35.2	0.7	2.1	1	IPR000210(34...140)	unreviewed	BTB domain-containing protein	619	PF00651	34..139
	Cyanistes caeruleus	Chordata	Craniata	Aves	Passeriformes	156563	A0A8C0VHH9	4.8e-08	36.5	1.1	1.2e-07	35.2	0.3	2	1	IPR000210(63...170)	unreviewed	BTB domain-containing protein	623	PF00651	63..169
	Cynoglossus semilaevis	Chordata	Craniata	Actinopteri	Pleuronectiformes	244447	A0A3P8V408	4.5e-08	36.6	1.1	1.2e-07	35.3	0.3	2.1	1	IPR000210(49...156)	unreviewed	BTB domain-containing protein	609	PF00651	49..155
	Cyprinodon variegatus	Chordata	Craniata	Actinopteri	Cyprinodontiformes	28743	A0A3Q2DTX5	4.7e-08	36.5	1.1	1.2e-07	35.2	0.3	2.1	1	IPR000210(75...182)	unreviewed	BTB domain-containing protein	635	PF00651	75..181
	Cyprinus carpio	Chordata	Craniata	Actinopteri	Cypriniformes	630221	A0A8C1BWU1	6.8e-08	36	2.2	1.2e-07	35.3	0.7	2.1	1	IPR000210(31...138)	unreviewed	BTB domain-containing protein	570	PF00651	31..137
	Cyprinus carpio	Chordata	Craniata	Actinopteri	Cypriniformes	630221	A0A8C1D665	7.4e-08	35.9	2.2	1.2e-07	35.2	0.7	2.1	1	IPR000210(31...138)	unreviewed	BTB domain-containing protein	591	PF00651	31..137
	Cyprinus carpio	Chordata	Craniata	Actinopteri	Cypriniformes	7962	A0A8C1M9W1	7.4e-08	35.9	2.2	1.2e-07	35.2	0.7	2.1	1	IPR000210(31...138)	unreviewed	BTB domain-containing protein	591	PF00651	31..137
	Cyprinus carpio	Chordata	Craniata	Actinopteri	Cypriniformes	7962	A0A8C1MCK2	6.8e-08	36	2.2	1.2e-07	35.3	0.7	2.1	1	IPR000210(31...138)	unreviewed	BTB domain-containing protein	570	PF00651	31..137
	Cyprinus carpio	Chordata	Craniata	Actinopteri	Cypriniformes	7962	A0A8C2BM08	7.4e-08	35.9	2.2	1.2e-07	35.2	0.7	2.1	1	IPR000210(31...138)	unreviewed	BTB domain-containing protein	591	PF00651	31..137
	Cyprinus carpio	Chordata	Craniata	Actinopteri	Cypriniformes	7962	A0A8C2IL27	5.5e-08	36.3	0	1.2e-07	35.3	0	1.5	1	IPR000210(85...189)	unreviewed	BTB domain-containing protein	655	PF00651	85..188
	Danionella translucida	Chordata	Craniata	Actinopteri	Cypriniformes	623744	A0A553QIP2	5.9e-08	36.2	0	1.2e-07	35.3	0	1.5	1	IPR000210(154...260)	unreviewed	BTB domain-containing protein	656	PF00651	154..259
	Denticeps clupeoides	Chordata	Craniata	Actinopteri	Clupeiformes	299321	A0A8C3ZDZ4	4.8e-08	36.5	1.1	1.2e-07	35.2	0.3	2.1	1	IPR000210(72...179)	unreviewed	BTB domain-containing protein	632	PF00651	72..178
	Dicentrarchus labrax	Chordata	Craniata	Actinopteri		13489	A0A8C4I8J2	4.9e-08	36.5	1.1	1.2e-07	35.2	0.3	2	1	IPR000210(71...178)	unreviewed	BTB domain-containing protein	631	PF00651	71..177
	Dissostichus mawsoni	Chordata	Craniata	Actinopteri	Perciformes	36200	A0A7J5ZH63	4.9e-08	36.5	1.1	1.2e-07	35.2	0.3	2.1	1	IPR000210(71...178)	unreviewed	BTB domain-containing protein	637	PF00651	71..177
	Dromaius novaehollandiae	Chordata	Craniata	Aves	Casuariiformes	8790	A0A7K9AZR8	6.8e-08	36	2.1	1.2e-07	35.3	0.7	2.1	1	IPR000210(34...140)	unreviewed	BTB domain-containing protein	593	PF00651	34..139
	Echeneis naucrates	Chordata	Craniata	Actinopteri	Carangiformes	173247	A0A665UA12	4.6e-08	36.5	1.1	1.2e-07	35.2	0.3	2.1	1	IPR000210(58...165)	unreviewed	BTB domain-containing protein	618	PF00651	58..164
	Electrophorus electricus	Chordata	Craniata	Actinopteri	Gymnotiformes	8005	A0A4W4G1A1	4.9e-08	36.4	1.1	1.2e-07	35.2	0.3	2	1	IPR000210(79...186)	unreviewed	BTB domain-containing protein	639	PF00651	79..185
	Electrophorus voltai	Chordata	Craniata	Actinopteri	Gymnotiformes	2609070	A0AAD9E2D0	4.9e-08	36.4	1.1	1.2e-07	35.2	0.3	2.1	1	IPR000210(49...156)	unreviewed	Uncharacterized protein	645	PF00651	49..155
	Eleutherodactylus coqui	Chordata	Craniata	Amphibia	Anura	57060	A0A8J6K611	5.1e-08	36.4	0.3	1.2e-07	35.3	0.3	1.6	1	IPR000210(53...160)	unreviewed	BTB domain-containing protein	521	PF00651	53..159
	Eolophus roseicapilla	Chordata	Craniata	Aves	Psittaciformes	176039	A0A851XLW4	6.9e-08	36	2.1	1.2e-07	35.2	0.7	2.1	1	IPR000210(34...140)	unreviewed	BTB domain-containing protein	620	PF00651	34..139
	Eptesicus nilssonii	Chordata	Craniata	Mammalia	Chiroptera	59451	A0AA40LF26	4.9e-08	36.5	0	1.2e-07	35.2	0	1.6	1	IPR000210(124...230)	unreviewed	BTB domain-containing protein	674	PF00651	124..229
	Erpetoichthys calabaricus	Chordata	Craniata	Cladistia	Polypteriformes	27687	A0A8C4RYZ3	4.6e-08	36.5	1.1	1.2e-07	35.2	0.3	2.1	1	IPR000210(64...171)	unreviewed	BTB domain-containing protein	624	PF00651	64..170
	Esox lucius	Chordata	Craniata	Actinopteri	Esociformes	8010	A0A3P8XU42	4.5e-08	36.6	1.1	1.2e-07	35.2	0.3	2.1	1	IPR000210(31...138)	unreviewed	BTB domain-containing protein	627	PF00651	31..137
	Eubucco bourcierii	Chordata	Craniata	Aves	Piciformes	91767	A0A7K8X5Q8	6.7e-08	36	2.1	1.2e-07	35.3	0.7	2.1	1	IPR000210(32...138)	unreviewed	BTB domain-containing protein	591	PF00651	32..137
	Eudromia elegans	Chordata	Craniata	Aves	Tinamiformes	8805	A0A7K7VIW8	6.7e-08	36	2.1	1.2e-07	35.3	0.7	2.1	1	IPR000210(33...139)	unreviewed	BTB domain-containing protein	592	PF00651	33..138
	Ficedula albicollis	Chordata	Craniata	Aves	Passeriformes	59894	U3JY77	3.5e-08	36.9	1.1	1.2e-07	35.2	0.3	2.4	1	IPR000210(83...190)	unreviewed	BTB domain-containing protein	644	PF00651	83..189
	Gambusia affinis	Chordata	Craniata	Actinopteri	Cyprinodontiformes	33528	A0A315W5N6	4.8e-08	36.5	1.1	1.2e-07	35.2	0.3	2	1	IPR000210(65...172)	unreviewed	BTB domain-containing protein	625	PF00651	65..171
	Gasterosteus aculeatus	Chordata	Craniata	Actinopteri	Perciformes	69293	G3NWN0	4.7e-08	36.5	1.1	1.2e-07	35.2	0.3	2.1	1	IPR000210(60...167)	unreviewed	BTB domain-containing protein	620	PF00651	60..166
	Gasterosteus aculeatus	Chordata	Craniata	Actinopteri	Perciformes	69293	G3NWP1	4.6e-08	36.5	1.1	1.2e-07	35.2	0.3	2.1	1	IPR000210(70...177)	unreviewed	BTB domain-containing protein	621	PF00651	70..176
	Geotrypetes seraphini	Chordata	Craniata	Amphibia	Gymnophiona	260995	A0A6P8PBK5	4.6e-08	36.5	1.1	1.2e-07	35.3	0.3	2	1	IPR000210(50...157)	unreviewed	BTB domain-containing protein	610	PF00651	50..156
	Glareola pratincola	Chordata	Craniata	Aves	Charadriiformes	43316	A0A7L4LUY4	6.6e-08	36	2.1	1.2e-07	35.3	0.7	2.1	1	IPR000210(34...140)	unreviewed	BTB domain-containing protein	589	PF00651	34..139
	Gymnodraco acuticeps	Chordata	Craniata	Actinopteri	Perciformes	8218	A0A6P8TMI0	4.6e-08	36.6	1.1	1.2e-07	35.3	0.3	2.1	1	IPR000210(46...153)	unreviewed	BTB domain-containing protein	612	PF00651	46..152
	Hemibagrus wyckioides	Chordata	Craniata	Actinopteri	Siluriformes	337641	A0A9D3NJ40	4.6e-08	36.6	1.1	1.2e-07	35.2	0.3	2.1	1	IPR000210(72...179)	unreviewed	BTB domain-containing protein	632	PF00651	72..178
	Hemibagrus wyckioides	Chordata	Craniata	Actinopteri	Siluriformes	337641	A0A9D3NW71	6.2e-08	36.1	0	1.2e-07	35.2	0	1.4	1	IPR000210(133...239)	unreviewed	BTB domain-containing protein	683	PF00651	133..238
	Hucho hucho	Chordata	Craniata	Actinopteri	Salmoniformes	62062	A0A4W5NK68	4.5e-08	36.6	1.1	1.2e-07	35.3	0.3	2.1	1	IPR000210(49...156)	unreviewed	BTB domain-containing protein	609	PF00651	49..155
	Hucho hucho	Chordata	Craniata	Actinopteri	Salmoniformes	62062	A0A4W5P2K8	5e-08	36.4	1.1	1.2e-07	35.2	0.3	2	1	IPR000210(83...190)	unreviewed	BTB domain-containing protein	643	PF00651	83..189
	Hucho hucho	Chordata	Craniata	Actinopteri	Salmoniformes	62062	A0A4W5PB99	4.6e-08	36.6	1.1	1.2e-07	35.3	0.3	2.1	1	IPR000210(51...158)	unreviewed	BTB domain-containing protein	611	PF00651	51..157
	Hydra vulgaris	Cnidaria		Hydrozoa	Anthoathecata	6087	A0A8B7DNI7	5.2e-08	36.4	0.2	1.2e-07	35.3	0.2	1.6	1	IPR000210(92...199)	unreviewed	BTB domain-containing protein	628	PF00651	92..198
	Hymenochirus boettgeri	Chordata	Craniata	Amphibia	Anura	247094	A0A8T2KEM5	6.1e-08	36.2	0.3	1.2e-07	35.2	0.3	1.5	1	IPR000210(1...108)	unreviewed	BTB domain-containing protein	548	PF00651	1..107
	Indicator maculatus	Chordata	Craniata	Aves	Piciformes	545262	A0A7L1GX58	6.8e-08	36	2.1	1.2e-07	35.3	0.7	2.1	1	IPR000210(34...140)	unreviewed	BTB domain-containing protein	593	PF00651	34..139
	Labeo rohita	Chordata	Craniata	Actinopteri	Cypriniformes	84645	A0A498LNY3	4.3e-08	36.6	1.1	1.2e-07	35.2	0.3	2.1	1	IPR000210(30...159)	unreviewed	BTB domain-containing protein	612	PF00651	30..158
	Laticauda laticaudata	Chordata	Craniata	Lepidosauria	Squamata	8630	A0A8C5SER1	4.4e-08	36.6	1.1	1.2e-07	35.3	0.3	2.1	1	IPR000210(69...176)	unreviewed	BTB domain-containing protein	607	PF00651	69..175
	Lophotis ruficrista	Chordata	Craniata	Aves	Gruiformes	172689	A0A7K8K3U9	6.8e-08	36	2.1	1.2e-07	35.3	0.7	2.1	1	IPR000210(34...140)	unreviewed	BTB domain-containing protein	593	PF00651	34..139
	Macaca fascicularis	Chordata	Craniata	Mammalia	Primates	9541	A0A2K5TQ59	4.6e-08	36.5	0	1.2e-07	35.2	0	1.7	1	IPR000210(134...240)	unreviewed	BTB domain-containing protein	684	PF00651	134..239
	Malurus cyaneus	Chordata	Craniata	Aves	Passeriformes	2593467	A0A8C5U902	4.4e-08	36.6	1.1	1.2e-07	35.2	0.3	2.1	1	IPR000210(90...197)	unreviewed	BTB domain-containing protein	630	PF00651	90..196
	Marmota monax	Chordata	Craniata	Mammalia	Rodentia	9995	A0A5E4BWR2	5.7e-08	36.3	0	1.2e-07	35.2	0	1.5	1	IPR000210(140...246)	unreviewed	BTB domain-containing protein	690	PF00651	140..245
	Marmota monax	Chordata	Craniata	Mammalia	Rodentia	9995	A0A5E4BWU2	5.4e-08	36.3	0	1.2e-07	35.3	0	1.5	1	IPR000210(140...246)	unreviewed	BTB domain-containing protein	663	PF00651	140..245
	Marmota monax	Chordata	Craniata	Mammalia	Rodentia	9995	A0A834UKY1	5.4e-08	36.3	0	1.2e-07	35.3	0	1.5	1	IPR000210(140...246)	unreviewed	BTB domain-containing protein	663	PF00651	140..245
	Maylandia zebra	Chordata	Craniata	Actinopteri	Cichliformes	106582	A0A3P9C6F7	4.4e-08	36.6	1.1	1.2e-07	35.3	0.3	2.1	1	IPR000210(89...196)	unreviewed	BTB domain-containing protein	615	PF00651	89..195
	Megalops atlanticus	Chordata	Craniata	Actinopteri	Elopiformes	7932	A0A9D3Q9T6	4.6e-08	36.6	1.1	1.2e-07	35.3	0.3	2.1	1	IPR000210(49...156)	unreviewed	BTB domain-containing protein	609	PF00651	49..155
	Melopsittacus undulatus	Chordata	Craniata	Aves	Psittaciformes	13146	A0A8C6NG60	4.5e-08	36.6	1.1	1.2e-07	35.3	0.3	2.1	1	IPR000210(56...163)	unreviewed	Uncharacterized protein	616	PF00651	56..162
	Microcaecilia unicolor	Chordata	Craniata	Amphibia	Gymnophiona	1415580	A0A6P7WW67	5.8e-08	36.2	0.3	1.2e-07	35.2	0.3	1.5	1	IPR000210(45...152)	unreviewed	BTB domain-containing protein	544	PF00651	45..151
	Monopterus albus	Chordata	Craniata	Actinopteri	Synbranchiformes	43700	A0A3Q3JSM2	5.3e-08	36.3	0	1.2e-07	35.2	0	1.6	1	IPR000210(59...165)	unreviewed	BTB domain-containing protein	667	PF00651	59..164
	Muraenolepis orangiensis	Chordata	Craniata	Actinopteri	Gadiformes	630683	A0A9Q0IUR4	4e-08	36.7	0.6	1.2e-07	35.3	0.6	1.8	1	IPR000210(20...126)	unreviewed	Zinc finger and BTB domain-containing protein 14	365	PF00651	20..123
	Myripristis murdjan	Chordata	Craniata	Actinopteri	Holocentriformes	586833	A0A667WK53	5e-08	36.4	1.1	1.2e-07	35.2	0.3	2.1	1	IPR000210(91...198)	unreviewed	BTB domain-containing protein	651	PF00651	91..197
	Nothobranchius furzeri	Chordata	Craniata	Actinopteri	Cyprinodontiformes	105023	A0A1A7ZU88	5.3e-08	36.3	0.1	1.2e-07	35.3	0.1	1.5	1	IPR000210(53...160)	unreviewed	BTB domain-containing protein	603	PF00651	53..159
	Nothobranchius furzeri	Chordata	Craniata	Actinopteri	Cyprinodontiformes	105023	A0A8C6VXD4	5.5e-08	36.3	0.1	1.2e-07	35.2	0.1	1.6	1	IPR000210(80...187)	unreviewed	BTB domain-containing protein	630	PF00651	80..186
	Nothobranchius kadleci	Chordata	Craniata	Actinopteri	Cyprinodontiformes	1051664	A0A1A8CWH9	5.3e-08	36.3	0.1	1.2e-07	35.3	0.1	1.5	1	IPR000210(53...160)	unreviewed	BTB domain-containing protein	603	PF00651	53..159
	Nothobranchius kuhntae	Chordata	Craniata	Actinopteri	Cyprinodontiformes	321403	A0A1A8I508	5.3e-08	36.3	0.1	1.2e-07	35.3	0.1	1.5	1	IPR000210(53...160)	unreviewed	BTB domain-containing protein	603	PF00651	53..159
	Nothobranchius rachovii	Chordata	Craniata	Actinopteri	Cyprinodontiformes	451742	A0A1A8PHY7	5.3e-08	36.3	0.1	1.2e-07	35.3	0.1	1.5	1	IPR000210(53...160)	unreviewed	BTB domain-containing protein	603	PF00651	53..159
	Nothocercus julius	Chordata	Craniata	Aves	Tinamiformes	2585813	A0A7K7WEF0	6.7e-08	36	2.1	1.2e-07	35.3	0.7	2.1	1	IPR000210(33...139)	unreviewed	BTB domain-containing protein	592	PF00651	33..138
	Nothocercus nigrocapillus	Chordata	Craniata	Aves	Tinamiformes	1977171	A0A851SZM0	6.7e-08	36	2.1	1.2e-07	35.3	0.7	2.1	1	IPR000210(33...139)	unreviewed	BTB domain-containing protein	592	PF00651	33..138
	Nothoprocta perdicaria	Chordata	Craniata	Aves	Tinamiformes	30464	A0A8C6Z277	4.7e-08	36.5	1.1	1.2e-07	35.2	0.3	2.1	1	IPR000210(80...187)	unreviewed	BTB domain-containing protein	640	PF00651	80..186
	Nothoprocta perdicaria	Chordata	Craniata	Aves	Tinamiformes	30464	A0A8C7EAZ0	4.6e-08	36.5	1.1	1.2e-07	35.3	0.3	2	1	IPR000210(83...190)	unreviewed	BTB domain-containing protein	610	PF00651	83..189
	Oceanites oceanicus	Chordata	Craniata	Aves	Procellariiformes	79653	A0A7K8U6Q8	6.8e-08	36	2.1	1.2e-07	35.3	0.7	2.1	1	IPR000210(34...140)	unreviewed	BTB domain-containing protein	593	PF00651	34..139
	Oncorhynchus kisutch	Chordata	Craniata	Actinopteri	Salmoniformes	8019	A0A8C7K8V9	4.6e-08	36.5	1.1	1.2e-07	35.3	0.3	2.1	1	IPR000210(52...159)	unreviewed	BTB domain-containing protein	612	PF00651	52..158
	Oncorhynchus mykiss	Chordata	Craniata	Actinopteri	Salmoniformes	8022	A0A8C7NQ49	4.8e-08	36.5	1.1	1.2e-07	35.2	0.3	2.1	1	IPR000210(77...184)	unreviewed	BTB domain-containing protein	639	PF00651	77..183
	Oncorhynchus mykiss	Chordata	Craniata	Actinopteri	Salmoniformes	8022	A0A8C7QR78	5e-08	36.4	1.1	1.2e-07	35.2	0.3	2	1	IPR000210(82...189)	unreviewed	BTB domain-containing protein	642	PF00651	82..188
	Oncorhynchus tshawytscha	Chordata	Craniata	Actinopteri	Salmoniformes	74940	A0A8C8F422	6e-08	36.2	0	1.2e-07	35.2	0	1.5	1	IPR000210(129...235)	unreviewed	BTB domain-containing protein	679	PF00651	129..234
	Oncorhynchus tshawytscha	Chordata	Craniata	Actinopteri	Salmoniformes	74940	A0A8C8FFM3	4.8e-08	36.5	1.1	1.2e-07	35.2	0.3	2.1	1	IPR000210(70...177)	unreviewed	BTB domain-containing protein	630	PF00651	70..176
	Oncorhynchus tshawytscha	Chordata	Craniata	Actinopteri	Salmoniformes	74940	A0A8C8FJJ1	4.6e-08	36.5	1.1	1.2e-07	35.3	0.3	2.1	1	IPR000210(52...159)	unreviewed	BTB domain-containing protein	612	PF00651	52..158
	Ophiophagus hannah	Chordata	Craniata	Lepidosauria	Squamata	8665	V8NP43	3.3e-08	37	0.3	1.2e-07	35.2	0.5	1.9	1	IPR000210(26...132)	unreviewed	Zinc finger protein	371	PF00651	26..129
	Oreochromis aureus	Chordata	Craniata	Actinopteri	Cichliformes	47969	A0A668VNK5	4.6e-08	36.5	1.1	1.2e-07	35.2	0.3	2.1	1	IPR000210(61...168)	unreviewed	BTB domain-containing protein	621	PF00651	61..167
	Oreochromis aureus	Chordata	Craniata	Actinopteri	Cichliformes	47969	A0A668VRY4	3.6e-08	36.9	1.1	1.2e-07	35.3	0.3	2.3	1	IPR000210(43...150)	unreviewed	BTB domain-containing protein	612	PF00651	43..149
	Oreochromis niloticus	Chordata	Craniata	Actinopteri	Cichliformes	8128	I3J2B1	4.6e-08	36.5	1.1	1.2e-07	35.2	0.3	2.1	1	IPR000210(61...168)	unreviewed	BTB domain-containing protein	621	PF00651	61..167
	Oryzias javanicus	Chordata	Craniata	Actinopteri	Beloniformes	123683	A0A3S2PAE9	4.4e-08	36.6	1.1	1.2e-07	35.3	0.3	2.1	1	IPR000210(49...156)	unreviewed	BTB domain-containing protein	609	PF00651	49..155
	Oryzias javanicus	Chordata	Craniata	Actinopteri	Beloniformes	123683	A0A3S2PQC2	5.3e-08	36.4	0.1	1.2e-07	35.2	0.1	1.6	1	IPR000210(22...130)	unreviewed	BTB domain-containing protein	597	PF00651	22..129
	Oryzias sinensis	Chordata	Craniata	Actinopteri	Beloniformes	183150	A0A8C7ZVL4	4.4e-08	36.6	1.1	1.2e-07	35.3	0.3	2.1	1	IPR000210(47...154)	unreviewed	BTB domain-containing protein	607	PF00651	47..153
	Ovis ammon	Chordata	Craniata	Mammalia	Artiodactyla	230172	A0AAD4TZF2	5.9e-08	36.2	0	1.2e-07	35.2	0	1.5	1	IPR000210(118...224)	unreviewed	Uncharacterized protein	668	PF00651	118..223
	Pan paniscus	Chordata	Craniata	Mammalia	Primates	9597	A0A2R9C6A0	7.6e-08	35.9	0	1.2e-07	35.2	0	1.3	1	IPR000210(54...143)	unreviewed	BTB domain-containing protein	144	PF00651	54..135
	Pangasianodon hypophthalmus	Chordata	Craniata	Actinopteri	Siluriformes	310915	A0A5N5LU87	4.5e-08	36.6	1.1	1.2e-07	35.2	0.3	2.1	1	IPR000210(71...178)	unreviewed	BTB domain-containing protein	631	PF00651	71..177
	Papio anubis	Chordata	Craniata	Mammalia	Primates	9555	A0A8I5N435	4.6e-08	36.5	0	1.2e-07	35.2	0	1.7	1	IPR000210(135...241)	unreviewed	BTB domain-containing protein	685	PF00651	135..240
	Paramormyrops kingsleyae	Chordata	Craniata	Actinopteri	Osteoglossiformes	1676925	A0A3B3R2M2	4.5e-08	36.6	1.1	1.2e-07	35.3	0.3	2.1	1	IPR000210(51...157)	unreviewed	BTB domain-containing protein	610	PF00651	51..156
	Patagioenas fasciata	Chordata	Craniata	Aves	Columbiformes	372326	A0A1V4KFS9	3.7e-08	36.8	0.3	1.2e-07	35.2	0.5	1.8	1	IPR000210(26...132)	unreviewed	Zinc finger and BTB domain-containing protein 14	368	PF00651	26..129
	Pelecanoides urinatrix	Chordata	Craniata	Aves	Procellariiformes	37079	A0A7L3C5E9	6.8e-08	36	2.1	1.2e-07	35.3	0.7	2.1	1	IPR000210(34...140)	unreviewed	BTB domain-containing protein	593	PF00651	34..139
	Perca flavescens	Chordata	Craniata	Actinopteri	Perciformes	8167	A0A484D5P8	4.6e-08	36.5	1.1	1.2e-07	35.2	0.3	2.1	1	IPR000210(51...158)	unreviewed	BTB domain-containing protein	617	PF00651	51..157
	Phasianus colchicus	Chordata	Craniata	Aves	Galliformes	9054	A0A669PN64	6.3e-08	36.1	0	1.2e-07	35.2	0	1.4	1	IPR000210(145...251)	unreviewed	BTB domain-containing protein	695	PF00651	145..250
	Phasianus colchicus	Chordata	Craniata	Aves	Galliformes	9054	A0A669PQ96	6.3e-08	36.1	0	1.2e-07	35.2	0	1.4	1	IPR000210(145...251)	unreviewed	BTB domain-containing protein	694	PF00651	145..250
	Piliocolobus tephrosceles	Chordata	Craniata	Mammalia	Primates	591936	A0A8C9GYT6	4.6e-08	36.6	0	1.2e-07	35.2	0	1.7	1	IPR000210(134...240)	unreviewed	BTB domain-containing protein	684	PF00651	134..239
	Poecilia latipinna	Chordata	Craniata	Actinopteri	Cyprinodontiformes	48699	A0A3B3UUJ6	4.9e-08	36.5	1.1	1.2e-07	35.2	0.3	2	1	IPR000210(73...180)	unreviewed	BTB domain-containing protein	633	PF00651	73..179
	Poecilia mexicana	Chordata	Craniata	Actinopteri	Cyprinodontiformes	48701	A0A3B3Y9G7	4.9e-08	36.5	1.1	1.2e-07	35.2	0.3	2	1	IPR000210(73...180)	unreviewed	BTB domain-containing protein	633	PF00651	73..179
	Poecilia reticulata	Chordata	Craniata	Actinopteri	Cyprinodontiformes	8081	A0A3P9P0E8	6.4e-08	36.1	1.7	1.2e-07	35.2	1.4	1.7	1	IPR000210(20...68)	unreviewed	BTB domain-containing protein	107	PF00651	20..68
	Poecilia reticulata	Chordata	Craniata	Actinopteri	Cyprinodontiformes	8081	A0A3P9PLG0	4.9e-08	36.5	1.1	1.2e-07	35.2	0.3	2	1	IPR000210(73...180)	unreviewed	BTB domain-containing protein	633	PF00651	73..179
	Poeciliopsis prolifica	Chordata	Craniata	Actinopteri	Cyprinodontiformes	188132	A0A0S7HZH9	4.5e-08	36.6	0.6	1.2e-07	35.2	0.6	1.7	1	IPR000210(2...102)	unreviewed	ZF161	372	PF00651	2..99
	Pongo abelii	Chordata	Craniata	Mammalia	Primates	9601	A0A8I5UBV1	5.6e-08	36.3	0	1.2e-07	35.2	0	1.5	1	IPR000210(134...240)	unreviewed	BTB domain-containing protein	677	PF00651	134..239
	Pongo abelii	Chordata	Craniata	Mammalia	Primates	9601	A0A8I5YJP4	5.9e-08	36.2	0	1.2e-07	35.2	0	1.5	1	IPR000210(134...240)	unreviewed	BTB domain-containing protein	684	PF00651	134..239
	Puma concolor	Chordata	Craniata	Mammalia	Carnivora	9696	A0A6P6HNS7	6e-08	36.2	0	1.2e-07	35.2	0	1.5	1	IPR000210(125...231)	unreviewed	BTB domain-containing protein	675	PF00651	125..230
	Ramphastos sulfuratus	Chordata	Craniata	Aves	Piciformes	322582	A0A852CFD6	6.7e-08	36	2.1	1.2e-07	35.3	0.7	2.1	1	IPR000210(33...139)	unreviewed	BTB domain-containing protein	592	PF00651	33..138
	Rhynochetos jubatus	Chordata	Craniata	Aves	Eurypygiformes	54386	A0A7K6RQQ7	6.8e-08	36	2.1	1.2e-07	35.3	0.7	2.1	1	IPR000210(34...140)	unreviewed	BTB domain-containing protein	593	PF00651	34..139
	Rostratula benghalensis	Chordata	Craniata	Aves	Charadriiformes	118793	A0A7L0CYJ8	6.8e-08	36	2.1	1.2e-07	35.3	0.7	2.1	1	IPR000210(34...140)	unreviewed	BTB domain-containing protein	593	PF00651	34..139
	Salarias fasciatus	Chordata	Craniata	Actinopteri	Blenniiformes	181472	A0A672G8V6	4.4e-08	36.6	1.1	1.2e-07	35.3	0.3	2.1	1	IPR000210(65...165)	unreviewed	BTB domain-containing protein	607	PF00651	65..164
	Salmo salar	Chordata	Craniata	Actinopteri	Salmoniformes	8030	A0A1S3MEJ4	4.7e-08	36.5	1.1	1.2e-07	35.2	0.3	2.1	1	IPR000210(49...156)	unreviewed	BTB domain-containing protein	619	PF00651	49..155
	Salmo salar	Chordata	Craniata	Actinopteri	Salmoniformes	8030	A0A1S3MEY1	4.5e-08	36.6	1.1	1.2e-07	35.3	0.3	2.1	1	IPR000210(49...156)	unreviewed	BTB domain-containing protein	609	PF00651	49..155
	Salmo trutta	Chordata	Craniata	Actinopteri	Salmoniformes	8032	A0A673Z410	5.8e-08	36.2	0	1.2e-07	35.2	0	1.5	1	IPR000210(116...222)	unreviewed	BTB domain-containing protein	666	PF00651	116..221
	Salmo trutta	Chordata	Craniata	Actinopteri	Salmoniformes	8032	A0A674ABY7	4.9e-08	36.5	1.1	1.2e-07	35.2	0.3	2.1	1	IPR000210(91...198)	unreviewed	BTB domain-containing protein	651	PF00651	91..197
	Salmo trutta	Chordata	Craniata	Actinopteri	Salmoniformes	8032	A0A674ACL0	4.7e-08	36.5	1.1	1.2e-07	35.2	0.3	2.1	1	IPR000210(62...169)	unreviewed	BTB domain-containing protein	622	PF00651	62..168
	Salmo trutta	Chordata	Craniata	Actinopteri	Salmoniformes	8032	A0A674CIZ5	4.6e-08	36.6	1.1	1.2e-07	35.3	0.3	2.1	1	IPR000210(50...157)	unreviewed	BTB domain-containing protein	610	PF00651	50..156
	Sander lucioperca	Chordata	Craniata	Actinopteri	Perciformes	283035	A0A8C9X4V6	4.5e-08	36.6	1.1	1.2e-07	35.3	0.3	2.1	1	IPR000210(55...162)	unreviewed	BTB domain-containing protein	612	PF00651	55..161
	Sciurus carolinensis	Chordata	Craniata	Mammalia	Rodentia	30640	A0AA41SUY3	5.9e-08	36.2	0	1.2e-07	35.2	0	1.5	1	IPR000210(118...224)	unreviewed	BTB domain-containing protein	668	PF00651	118..223
	Scleropages formosus	Chordata	Craniata	Actinopteri	Osteoglossiformes	113540	A0A8C9RDV5	4.9e-08	36.5	1.1	1.2e-07	35.2	0.3	2.1	1	IPR000210(78...184)	unreviewed	BTB domain-containing protein	637	PF00651	78..183
	Scleropages formosus	Chordata	Craniata	Actinopteri	Osteoglossiformes	113540	A0A8C9SMT0	4.5e-08	36.6	1.1	1.2e-07	35.3	0.3	2.1	1	IPR000210(48...154)	unreviewed	BTB domain-containing protein	607	PF00651	48..153
	Scophthalmus maximus	Chordata	Craniata	Actinopteri	Pleuronectiformes	52904	A0A8D3B830	4.6e-08	36.5	1.1	1.2e-07	35.3	0.3	2.1	1	IPR000210(59...166)	unreviewed	BTB domain-containing protein	616	PF00651	59..165
	Sinocyclocheilus anshuiensis	Chordata	Craniata	Actinopteri	Cypriniformes	1608454	A0A671PQ65	4.3e-08	36.6	1.1	1.2e-07	35.3	0.3	2.1	1	IPR000210(48...155)	unreviewed	BTB domain-containing protein	609	PF00651	48..154
	Sinocyclocheilus grahami	Chordata	Craniata	Actinopteri	Cypriniformes	75366	A0A672P7I5	4.9e-08	36.5	1.1	1.2e-07	35.2	0.3	2	1	IPR000210(73...180)	unreviewed	BTB domain-containing protein	633	PF00651	73..179
	Sinocyclocheilus grahami	Chordata	Craniata	Actinopteri	Cypriniformes	75366	A0A672PA25	4.7e-08	36.5	1.1	1.2e-07	35.2	0.3	2.1	1	IPR000210(81...188)	unreviewed	BTB domain-containing protein	632	PF00651	81..187
	Sinocyclocheilus grahami	Chordata	Craniata	Actinopteri	Cypriniformes	75366	A0A672PEQ4	4.9e-08	36.5	1.1	1.2e-07	35.2	0.3	2.1	1	IPR000210(81...188)	unreviewed	BTB domain-containing protein	641	PF00651	81..187
	Sphaeramia orbicularis	Chordata	Craniata	Actinopteri	Kurtiformes	375764	A0A672ZWR9	4.7e-08	36.5	1.1	1.2e-07	35.2	0.3	2.1	1	IPR000210(83...188)	unreviewed	BTB domain-containing protein	641	PF00651	83..187
	Steatornis caripensis	Chordata	Craniata	Aves	Caprimulgiformes	48435	A0A7K6VZD2	6.7e-08	36	2.1	1.2e-07	35.3	0.7	2.1	1	IPR000210(34...140)	unreviewed	BTB domain-containing protein	593	PF00651	34..139
	Sus scrofa	Chordata	Craniata	Mammalia	Artiodactyla	9823	A0A8D1LGY9	6e-08	36.2	0	1.2e-07	35.2	0	1.5	1	IPR000210(122...228)	unreviewed	BTB domain-containing protein	672	PF00651	122..227
	Sus scrofa	Chordata	Craniata	Mammalia	Artiodactyla	9823	A0A8D1QLH7	6e-08	36.2	0	1.2e-07	35.2	0	1.5	1	IPR000210(122...228)	unreviewed	BTB domain-containing protein	672	PF00651	122..227
	Synaphobranchus kaupii	Chordata	Craniata	Actinopteri	Anguilliformes	118154	A0A9Q1FFI7	5.5e-08	36.3	0	1.2e-07	35.3	0	1.5	1	IPR000210(59...165)	unreviewed	BTB domain-containing protein	659	PF00651	59..164
	Synaphobranchus kaupii	Chordata	Craniata	Actinopteri	Anguilliformes	118154	A0A9Q1FKS1	4.8e-08	36.5	1.1	1.2e-07	35.2	0.3	2.1	1	IPR000210(68...175)	unreviewed	BTB domain-containing protein	628	PF00651	68..174
	Tachysurus vachellii	Chordata	Craniata	Actinopteri	Siluriformes	175792	A0AA88LW37	4.6e-08	36.5	1.1	1.2e-07	35.2	0.3	2.1	1	IPR000210(72...179)	unreviewed	BTB domain-containing protein	632	PF00651	72..177
	Takifugu bimaculatus	Chordata	Craniata	Actinopteri	Tetraodontiformes	433685	A0A4Z2CFP6	4.3e-08	36.6	0.1	1.2e-07	35.2	0.1	1.8	1	IPR000210(22...130)	unreviewed	BTB domain-containing protein	348	PF00651	22..129
	Takifugu rubripes	Chordata	Craniata	Actinopteri	Tetraodontiformes	31033	A0A674P4J7	6e-08	36.2	0.3	1.2e-07	35.2	0.3	1.6	1	IPR000210(76...183)	unreviewed	BTB domain-containing protein	636	PF00651	76..182
	Triplophysa rosa	Chordata	Craniata	Actinopteri	Cypriniformes	992332	A0A9W7WCF9	7.4e-08	35.9	2.2	1.2e-07	35.2	0.7	2.1	1	IPR000210(30...137)	unreviewed	BTB domain-containing protein	590	PF00651	30..136
	Vombatus ursinus	Chordata	Craniata	Mammalia	Diprotodontia	29139	A0A4X2M954	1.2e-07	35.2	0.3	1.2e-07	35.2	0.3	2	1	IPR000210(82...188)	unreviewed	BTB domain-containing protein	641	PF00651	82..187
	Xiphophorus maculatus	Chordata	Craniata	Actinopteri	Cyprinodontiformes	8083	M3ZNP7	4.9e-08	36.5	1.1	1.2e-07	35.2	0.3	2	1	IPR000210(73...180)	unreviewed	BTB domain-containing protein	633	PF00651	73..179
	Acanthaster planci	Echinodermata		Asteroidea	Valvatida	133434	A0A8B7ZZ74	5.3e-08	36.4	0.1	1.3e-07	35.1	0.1	1.7	1	IPR000210(28...132)	unreviewed	BTB domain-containing protein	584	PF00651	28..131
	Alligator mississippiensis	Chordata	Craniata		Crocodylia	8496	A0A151MIK0	6.5e-08	36.1	0	1.3e-07	35.1	0	1.4	1	IPR000210(121...227)	unreviewed	BTB domain-containing protein	711	PF00651	121..226
	Ameiurus melas	Chordata	Craniata	Actinopteri	Siluriformes	219545	A0A7J6A822	4.9e-08	36.5	1.1	1.3e-07	35.1	0.3	2.1	1	IPR000210(100...207)	unreviewed	BTB domain-containing protein	660	PF00651	100..206
	Aotus nancymaae	Chordata	Craniata	Mammalia	Primates	37293	A0A2K5CH42	7.6e-08	35.9	0	1.3e-07	35.2	0	1.3	1	IPR000210(55...144)	unreviewed	BTB domain-containing protein	145	PF00651	55..136
	Astatotilapia calliptera	Chordata	Craniata	Actinopteri	Cichliformes	8154	A0A3P8Q5D2	1.3e-07	35.1	0.2	1.3e-07	35.1	0.2	2.7	1	IPR000210(15...113)	unreviewed	Zinc finger and BTB domain containing 17	451	PF00651	15..108
	Astatotilapia calliptera	Chordata	Craniata	Actinopteri	Cichliformes	8154	A0A3P8Q680	1.3e-07	35.2	0.2	1.3e-07	35.2	0.2	1.9	1	IPR000210(15...112)	unreviewed	Zinc finger and BTB domain containing 17	415	PF00651	15..107
	Austrofundulus limnaeus	Chordata	Craniata	Actinopteri	Cyprinodontiformes	52670	A0A2I4BTW1	5.2e-08	36.4	1.1	1.3e-07	35.1	0.3	2.1	1	IPR000210(102...209)	unreviewed	BTB domain-containing protein	668	PF00651	102..208
	Austrofundulus limnaeus	Chordata	Craniata	Actinopteri	Cyprinodontiformes	52670	A0A2I4BU01	5.1e-08	36.4	1.1	1.3e-07	35.1	0.3	2.1	1	IPR000210(102...209)	unreviewed	BTB domain-containing protein	662	PF00651	102..208
	Betta splendens	Chordata	Craniata	Actinopteri	Anabantiformes	158456	A0A6P7N0M4	5.3e-08	36.4	1.1	1.3e-07	35.1	0.3	2	1	IPR000210(101...208)	unreviewed	BTB domain-containing protein	661	PF00651	101..207
	Biomphalaria glabrata	Mollusca		Gastropoda		6526	A0A2C9LZK8	6.8e-08	36	0.2	1.3e-07	35.1	0.2	1.4	1	IPR000210(34...123)	unreviewed	BTB domain-containing protein	123	PF00651	34..123
	Branchiostoma belcheri	Chordata	Cephalochordata	Leptocardii	Amphioxiformes	7741	A0A6P5A822	5.6e-08	36.3	0.1	1.3e-07	35.1	0.1	1.7	1	IPR000210(25...138)	unreviewed	BTB domain-containing protein	598	PF00651	25..136
	Callithrix jacchus	Chordata	Craniata	Mammalia	Primates	9483	A0A2R8MQ86	7.6e-08	35.9	0	1.3e-07	35.2	0	1.3	1	IPR000210(55...144)	unreviewed	BTB domain-containing protein	145	PF00651	55..136
	Callorhinchus milii	Chordata	Craniata	Chondrichthyes	Chimaeriformes	7868	A0A4W3J969	6e-08	36.2	0.1	1.3e-07	35.1	0.1	1.6	1	IPR000210(14...116)	unreviewed	Zinc finger and BTB domain-containing protein 17	732	PF00651	14..114
	Callorhinchus milii	Chordata	Craniata	Chondrichthyes	Chimaeriformes	7868	A0A4W3JDE8	6e-08	36.2	0.1	1.3e-07	35.1	0.1	1.6	1	IPR000210(16...118)	unreviewed	Zinc finger and BTB domain-containing protein 17	736	PF00651	16..116
	Callorhinchus milii	Chordata	Craniata	Chondrichthyes	Chimaeriformes	7868	A0A4W3JW57	6e-08	36.2	0.1	1.3e-07	35.1	0.1	1.6	1	IPR000210(14...116)	unreviewed	Zinc finger and BTB domain-containing protein 17	736	PF00651	14..114
	Cebus imitator	Chordata	Craniata	Mammalia	Primates	2715852	A0A2K5PJP6	7.7e-08	35.8	0	1.3e-07	35.2	0	1.3	1	IPR000210(55...144)	unreviewed	BTB domain-containing protein	145	PF00651	55..136
	Cercocebus atys	Chordata	Craniata	Mammalia	Primates	9531	A0A2K5NBI6	7.6e-08	35.8	0	1.3e-07	35.2	0	1.3	1	IPR000210(55...144)	unreviewed	BTB domain-containing protein	145	PF00651	55..136
	Chiloscyllium punctatum	Chordata	Craniata	Chondrichthyes	Orectolobiformes	137246	A0A401SFF4	5.6e-08	36.3	0.1	1.3e-07	35.1	0.1	1.7	1	IPR000210(14...116)	unreviewed	Zinc finger and BTB domain-containing protein 17	721	PF00651	14..113
	Collichthys lucidus	Chordata	Craniata	Actinopteri		240159	A0A4U5UUT5	5.4e-08	36.3	1.1	1.3e-07	35.1	0.3	2	1	IPR000210(109...216)	unreviewed	BTB domain-containing protein	670	PF00651	109..215
	Collichthys lucidus	Chordata	Craniata	Actinopteri		240159	A0A4U5VJJ1	5e-08	36.4	0.6	1.3e-07	35.1	0.6	1.7	1	IPR000210(20...126)	unreviewed	Zinc finger and BTB domain-containing protein 14	390	PF00651	20..123
	Conger conger	Chordata	Craniata	Actinopteri	Anguilliformes	82655	A0A9Q1DAP0	5.9e-08	36.2	1.6	1.3e-07	35.1	0.4	2.1	1	IPR000210(153...263)	unreviewed	BTB domain-containing protein	700	PF00651	153..262
	Erpetoichthys calabaricus	Chordata	Craniata	Cladistia	Polypteriformes	27687	A0A8C4RZZ8	5.2e-08	36.4	0.5	1.3e-07	35.1	0.5	1.7	1	IPR000210(20...126)	unreviewed	Zinc finger and BTB domain-containing protein 14	398	PF00651	20..125
	Falco tinnunculus	Chordata	Craniata	Aves	Falconiformes	100819	A0A8C4U6B8	6.1e-08	36.2	0	1.3e-07	35.1	0	1.5	1	IPR000210(165...271)	unreviewed	BTB domain-containing protein	717	PF00651	165..270
	Geotrypetes seraphini	Chordata	Craniata	Amphibia	Gymnophiona	260995	A0A6P8QPB8	6.3e-08	36.1	0.3	1.3e-07	35.1	0.3	1.5	1	IPR000210(45...152)	unreviewed	BTB domain-containing protein	592	PF00651	45..151
	Gorilla gorilla	Chordata	Craniata	Mammalia	Primates	9595	A0A2I2ZKK7	7.6e-08	35.8	0	1.3e-07	35.2	0	1.3	1	IPR000210(55...144)	unreviewed	BTB domain-containing protein	145	PF00651	55..136
	Gymnodraco acuticeps	Chordata	Craniata	Actinopteri	Perciformes	8218	A0A6P8TMI4	7.6e-08	35.9	2.3	1.3e-07	35.1	0.8	2.1	1	IPR000210(31...146)	unreviewed	BTB domain-containing protein	605	PF00651	31..145
	Gymnodraco acuticeps	Chordata	Craniata	Actinopteri	Perciformes	8218	A0A6P8TMQ6	7.8e-08	35.8	2.3	1.3e-07	35.1	0.8	2.1	1	IPR000210(46...161)	unreviewed	BTB domain-containing protein	614	PF00651	46..160
	Gymnodraco acuticeps	Chordata	Craniata	Actinopteri	Perciformes	8218	A0A6P8UGI8	8e-08	35.8	2.3	1.3e-07	35.1	0.8	2.1	1	IPR000210(46...161)	unreviewed	BTB domain-containing protein	620	PF00651	46..160
	Hipposideros armiger	Chordata	Craniata	Mammalia	Chiroptera	186990	A0A8B7SWI2	6e-08	36.2	0	1.3e-07	35.1	0	1.5	1	IPR000210(54...161)	unreviewed	Kelch-like protein 3	567	PF00651	54..160
	Hipposideros armiger	Chordata	Craniata	Mammalia	Chiroptera	186990	A0A8B7SY57	6.3e-08	36.1	0	1.3e-07	35.1	0	1.5	1	IPR000210(39...146)	unreviewed	Kelch-like protein 3	586	PF00651	39..145
	Homo sapiens	Chordata	Craniata	Mammalia	Primates	9606	B4DFF5	7.6e-08	35.8	0	1.3e-07	35.2	0	1.3	1	IPR000210(55...144)	unreviewed	BTB domain-containing protein	145	PF00651	55..136
	Homo sapiens	Chordata	Craniata	Mammalia	Primates	9606	M0R1N0	7.6e-08	35.8	0	1.3e-07	35.2	0	1.3	1	IPR000210(55...144)	unreviewed	BTB domain-containing protein	145	PF00651	55..136
	Ictalurus punctatus	Chordata	Craniata	Actinopteri	Siluriformes	7998	A0A979F829	5.1e-08	36.4	1.1	1.3e-07	35.1	0.3	2.1	1	IPR000210(106...213)	unreviewed	BTB domain-containing protein	666	PF00651	106..212
	Kryptolebias marmoratus	Chordata	Craniata	Actinopteri	Cyprinodontiformes	37003	A0A3Q3A2K1	1.3e-07	35.2	0.6	1.3e-07	35.2	0.6	2.5	1	IPR000210(20...126)	unreviewed	Zinc finger and BTB domain containing 14	385	PF00651	20..123
	Kryptolebias marmoratus	Chordata	Craniata	Actinopteri	Cyprinodontiformes	37003	A0A3Q3ETG4	1.3e-07	35.1	0.6	1.3e-07	35.1	0.6	2.5	1	IPR000210(22...128)	unreviewed	Zinc finger and BTB domain containing 14	401	PF00651	22..125
	Labrus bergylta	Chordata	Craniata	Actinopteri	Labriformes	56723	A0A3Q3MP49	4.3e-08	36.6	0.1	1.3e-07	35.1	0.1	1.9	1	IPR000210(22...130)	unreviewed	BTB domain-containing protein	598	PF00651	22..129
	Lates japonicus	Chordata	Craniata	Actinopteri		270547	A0AAD3M2A5	5.2e-08	36.4	1.1	1.3e-07	35.2	0.3	2	1	IPR000210(89...196)	unreviewed	Kelch-like protein 17 isoform X1	655	PF00651	89..195
	Lynx pardinus	Chordata	Craniata	Mammalia	Carnivora	191816	A0A485N9B5	5.8e-08	36.2	0.2	1.3e-07	35.1	0.2	1.6	1	IPR000210(53...160)	unreviewed	BTB domain-containing protein	459	PF00651	53..159
	Macaca fascicularis	Chordata	Craniata	Mammalia	Primates	9541	A0A2K5VJQ5	7.7e-08	35.8	0	1.3e-07	35.2	0	1.3	1	IPR000210(55...144)	unreviewed	BTB domain-containing protein	145	PF00651	55..136
	Macaca nemestrina	Chordata	Craniata	Mammalia	Primates	9545	A0A2K6EC17	5.6e-08	36.3	0.2	1.3e-07	35.2	0	1.7	1	IPR000210(55...144)	unreviewed	BTB domain-containing protein	145	PF00651	55..136
	Microcaecilia unicolor	Chordata	Craniata	Amphibia	Gymnophiona	1415580	A0A6P7X259	6.4e-08	36.1	0.3	1.3e-07	35.1	0.3	1.5	1	IPR000210(45...152)	unreviewed	BTB domain-containing protein	592	PF00651	45..151
	Myotis lucifugus	Chordata	Craniata	Mammalia	Chiroptera	59463	G1PTW0	5.7e-08	36.2	0.5	1.3e-07	35.1	0.5	1.6	1	IPR000210(25...131)	unreviewed	Zinc finger and BTB domain containing 14	395	PF00651	25..128
	Neolamprologus brichardi	Chordata	Craniata	Actinopteri	Cichliformes	32507	A0A3Q4HM09	5.1e-08	36.4	0.6	1.3e-07	35.1	0.6	1.7	1	IPR000210(20...126)	unreviewed	Zinc finger and BTB domain containing 14	404	PF00651	20..123
	Nomascus leucogenys	Chordata	Craniata	Mammalia	Primates	61853	A0A2I3G2L0	7.4e-08	35.9	0	1.3e-07	35.2	0	1.3	1	IPR000210(55...144)	unreviewed	BTB domain-containing protein	145	PF00651	55..136
	Nothobranchius furzeri	Chordata	Craniata	Actinopteri	Cyprinodontiformes	105023	A0A8C6M8Y1	5.1e-08	36.4	0.6	1.3e-07	35.1	0.6	1.7	1	IPR000210(20...126)	unreviewed	Zinc finger and BTB domain containing 14	402	PF00651	20..122
	Notothenia coriiceps	Chordata	Craniata	Actinopteri	Perciformes	8208	A0A6I9NJ77	7.2e-08	35.9	2.3	1.3e-07	35.1	0.8	2.1	1	IPR000210(31...146)	unreviewed	BTB domain-containing protein	605	PF00651	31..145
	Notothenia coriiceps	Chordata	Craniata	Actinopteri	Perciformes	8208	A0A6I9NKV0	7e-08	36	2.3	1.3e-07	35.1	0.8	2.1	1	IPR000210(31...146)	unreviewed	BTB domain-containing protein	599	PF00651	31..145
	Nycticryphes semicollaris	Chordata	Craniata	Aves	Charadriiformes	227226	A0A7L1I028	9e-08	35.6	2.9	1.3e-07	35.1	1.1	2.1	1	IPR000210(34...148)	unreviewed	BTB domain-containing protein	601	PF00651	34..147
	Oncorhynchus mykiss	Chordata	Craniata	Actinopteri	Salmoniformes	8022	A0A060Y1D2	3.6e-08	36.9	0.6	1.3e-07	35.1	0.6	2	1	IPR000210(20...126)	unreviewed	Zinc finger and BTB domain-containing protein 14	391	PF00651	20..122
	Oncorhynchus mykiss	Chordata	Craniata	Actinopteri	Salmoniformes	8022	A0A8C7QTV7	5.1e-08	36.4	1.1	1.3e-07	35.2	0.3	2	1	IPR000210(94...201)	unreviewed	BTB domain-containing protein	654	PF00651	94..200
	Ornithorhynchus anatinus	Chordata	Craniata	Mammalia	Monotremata	9258	F7CVQ6	1.3e-07	35.2	0.3	1.3e-07	35.2	0.3	1.9	1	IPR000210(96...202)	unreviewed	BTB domain-containing protein	655	PF00651	96..201
	Pan troglodytes	Chordata	Craniata	Mammalia	Primates	9598	A0A6D2XX11	7.6e-08	35.8	0	1.3e-07	35.2	0	1.3	1	IPR000210(55...144)	unreviewed	BTB domain-containing protein	145	PF00651	55..136
	Pan troglodytes	Chordata	Craniata	Mammalia	Primates	9598	H2RHS1	7.6e-08	35.8	0	1.3e-07	35.2	0	1.3	1	IPR000210(55...144)	unreviewed	BTB domain-containing protein	145	PF00651	55..136
	Papio anubis	Chordata	Craniata	Mammalia	Primates	9555	A0A2I3N6S7	7.6e-08	35.8	0	1.3e-07	35.2	0	1.3	1	IPR000210(55...144)	unreviewed	BTB domain-containing protein	145	PF00651	55..136
	Phascolarctos cinereus	Chordata	Craniata	Mammalia	Diprotodontia	38626	A0A6P5JE80	1.3e-07	35.2	0.3	1.3e-07	35.2	0.3	2	1	IPR000210(96...202)	unreviewed	BTB domain-containing protein	655	PF00651	96..201
	Phasianus colchicus	Chordata	Craniata	Aves	Galliformes	9054	A0A669Q6H8	6.3e-08	36.1	0	1.3e-07	35.2	0	1.5	1	IPR000210(145...251)	unreviewed	BTB domain-containing protein	704	PF00651	145..250
	Piliocolobus tephrosceles	Chordata	Craniata	Mammalia	Primates	591936	A0A8C9I855	7.6e-08	35.8	0	1.3e-07	35.2	0	1.3	1	IPR000210(55...144)	unreviewed	BTB domain-containing protein	145	PF00651	55..136
	Pipra filicauda	Chordata	Craniata	Aves	Passeriformes	649802	A0A7R5L7G4	5.2e-08	36.4	1.1	1.3e-07	35.1	0.3	2.1	1	IPR000210(101...208)	unreviewed	BTB domain-containing protein	661	PF00651	101..207
	Poeciliopsis prolifica	Chordata	Craniata	Actinopteri	Cyprinodontiformes	188132	A0A0S7I2H1	4.8e-08	36.5	0.6	1.3e-07	35.1	0.6	1.7	1	IPR000210(2...102)	unreviewed	ZF161	388	PF00651	2..99
	Pongo abelii	Chordata	Craniata	Mammalia	Primates	9601	A0A2J8T5S3	7.6e-08	35.8	0	1.3e-07	35.2	0	1.3	1	IPR000210(55...144)	unreviewed	BTB domain-containing protein	145	PF00651	55..136
	Rhinopithecus bieti	Chordata	Craniata	Mammalia	Primates	61621	A0A2K6K242	7.6e-08	35.8	0	1.3e-07	35.2	0	1.3	1	IPR000210(55...144)	unreviewed	BTB domain-containing protein	145	PF00651	55..136
	Rhinopithecus roxellana	Chordata	Craniata	Mammalia	Primates	61622	A0A2K6P949	7.6e-08	35.8	0	1.3e-07	35.2	0	1.3	1	IPR000210(55...144)	unreviewed	BTB domain-containing protein	145	PF00651	55..136
	Saimiri boliviensis	Chordata	Craniata	Mammalia	Primates	39432	A0A2K6UEP7	7.7e-08	35.8	0	1.3e-07	35.2	0	1.3	1	IPR000210(55...144)	unreviewed	BTB domain-containing protein	145	PF00651	55..136
	Scophthalmus maximus	Chordata	Craniata	Actinopteri	Pleuronectiformes	52904	A0A8D3DQT3	5.1e-08	36.4	1.1	1.3e-07	35.1	0.3	2.1	1	IPR000210(105...212)	unreviewed	BTB domain-containing protein	665	PF00651	105..211
	Serinus canaria	Chordata	Craniata	Aves	Passeriformes	9135	A0A8C9UIZ0	7.5e-08	35.9	0.3	1.3e-07	35.1	0.3	1.4	1	IPR000210(30...138)	unreviewed	BTB domain-containing protein	659	PF00651	30..125
	Sus scrofa	Chordata	Craniata	Mammalia	Artiodactyla	9823	A0A8D0JYQ0	6.2e-08	36.1	0	1.3e-07	35.1	0	1.5	1	IPR000210(238...344)	unreviewed	BTB domain-containing protein	740	PF00651	238..343
	Sus scrofa	Chordata	Craniata	Mammalia	Artiodactyla	9823	A0A8D0QG79	6.2e-08	36.1	0	1.3e-07	35.1	0	1.5	1	IPR000210(238...344)	unreviewed	BTB domain-containing protein	740	PF00651	238..343
	Sus scrofa	Chordata	Craniata	Mammalia	Artiodactyla	9823	A0A8D0UEM9	6.1e-08	36.2	0	1.3e-07	35.1	0	1.5	1	IPR000210(238...344)	unreviewed	BTB domain-containing protein	730	PF00651	238..343
	Sus scrofa	Chordata	Craniata	Mammalia	Artiodactyla	9823	A0A8D1CI81	6.2e-08	36.1	0	1.3e-07	35.1	0	1.5	1	IPR000210(238...344)	unreviewed	BTB domain-containing protein	740	PF00651	238..343
	Sus scrofa	Chordata	Craniata	Mammalia	Artiodactyla	9823	A0A8D1HWS6	6.1e-08	36.2	0	1.3e-07	35.1	0	1.5	1	IPR000210(238...344)	unreviewed	BTB domain-containing protein	730	PF00651	238..343
	Sus scrofa	Chordata	Craniata	Mammalia	Artiodactyla	9823	A0A8D1LH60	6.1e-08	36.2	0	1.3e-07	35.1	0	1.5	1	IPR000210(238...344)	unreviewed	BTB domain-containing protein	730	PF00651	238..343
	Sus scrofa	Chordata	Craniata	Mammalia	Artiodactyla	9823	A0A8D1LH75	6.2e-08	36.1	0	1.3e-07	35.1	0	1.5	1	IPR000210(238...344)	unreviewed	BTB domain-containing protein	740	PF00651	238..343
	Sus scrofa	Chordata	Craniata	Mammalia	Artiodactyla	9823	A0A8D1VB17	6.2e-08	36.1	0	1.3e-07	35.1	0	1.5	1	IPR000210(238...344)	unreviewed	BTB domain-containing protein	740	PF00651	238..343
	Takifugu rubripes	Chordata	Craniata	Actinopteri	Tetraodontiformes	31033	A0A674NUD5	5.3e-08	36.3	0.6	1.3e-07	35.1	0.6	1.7	1	IPR000210(20...126)	unreviewed	Zinc finger and BTB domain containing 14	408	PF00651	20..122
	Theropithecus gelada	Chordata	Craniata	Mammalia	Primates	9565	A0A8D2F3M6	7.6e-08	35.8	0	1.3e-07	35.2	0	1.3	1	IPR000210(55...144)	unreviewed	BTB domain-containing protein	145	PF00651	55..136
	Tyrannus savana	Chordata	Craniata	Aves	Passeriformes	137541	A0A7L0XX97	6.1e-08	36.2	0.2	1.3e-07	35.1	0.2	1.5	1	IPR000210(45...152)	unreviewed	BTB domain-containing protein	587	PF00651	45..151
	Xiphophorus couchianus	Chordata	Craniata	Actinopteri	Cyprinodontiformes	32473	A0A3B5L1L3	5.3e-08	36.4	0.6	1.3e-07	35.1	0.6	1.7	1	IPR000210(20...126)	unreviewed	Uncharacterized protein	406	PF00651	20..123
	Acinonyx jubatus	Chordata	Craniata	Mammalia	Carnivora	32536	A0A6J2A3C5	7.1e-08	35.9	0.2	1.4e-07	35	0.2	1.5	1	IPR000210(46...153)	unreviewed	BTB domain-containing protein	504	PF00651	46..152
	Anabas testudineus	Chordata	Craniata	Actinopteri	Anabantiformes	64144	A0A3Q1IM77	1.4e-07	35	0.6	1.4e-07	35	0.6	2.7	1	IPR000210(20...126)	unreviewed	Zinc finger and BTB domain containing 14	415	PF00651	20..121
	Anser brachyrhynchus	Chordata	Craniata	Aves	Anseriformes	132585	A0A8B9I482	4.8e-08	36.5	1.1	1.4e-07	35	0.3	2.3	1	IPR000210(30...137)	unreviewed	BTB domain-containing protein	726	PF00651	30..136
	Anser cygnoides	Chordata	Craniata	Aves	Anseriformes	8845	A0A8B9E0D6	4.8e-08	36.5	1.1	1.4e-07	35	0.3	2.3	1	IPR000210(30...137)	unreviewed	BTB domain-containing protein	726	PF00651	30..136
	Callorhinchus milii	Chordata	Craniata	Chondrichthyes	Chimaeriformes	7868	A0A4W3IPB8	5.9e-08	36.2	1.5	1.4e-07	35	1.5	1.7	1	IPR000210(12...46)	unreviewed	BTB domain-containing protein	110	PF00651	12..46
	Calyptomena viridis	Chordata	Craniata	Aves	Passeriformes	135972	A0A851CBI0	5.8e-08	36.2	0.1	1.4e-07	35.1	0.1	1.7	1	IPR000210(14...116)	unreviewed	ZBT17 protein	790	PF00651	14..110
	Cardinalis cardinalis	Chordata	Craniata	Aves	Passeriformes	98964	A0A7K5MIR7	5.1e-08	36.4	2.6	1.4e-07	35	0.9	2.3	1	IPR000210(34...143)	unreviewed	BTB domain-containing protein	306	PF00651	34..142
	Conger conger	Chordata	Craniata	Actinopteri	Anguilliformes	82655	A0A9Q1D5W6	5.8e-08	36.2	1.1	1.4e-07	35	0.3	2.1	1	IPR000210(51...158)	unreviewed	BTB domain-containing protein	714	PF00651	51..157
	Dissostichus mawsoni	Chordata	Craniata	Actinopteri	Perciformes	36200	A0A7J5Z848	1.4e-07	35	0	1.4e-07	35	0	2.3	1	IPR000210(64...170)	unreviewed	BTB domain-containing protein	190	PF00651	64..165
	Eleutherodactylus coqui	Chordata	Craniata	Amphibia	Anura	57060	A0A8J6K911	6.7e-08	36	0.3	1.4e-07	35	0.3	1.5	1	IPR000210(53...160)	unreviewed	BTB domain-containing protein	600	PF00651	53..159
	Equus caballus	Chordata	Craniata	Mammalia	Perissodactyla	9796	A0A9L0RWF6	6.1e-08	36.2	0.5	1.4e-07	35	0.5	1.6	1	IPR000210(26...132)	unreviewed	Zinc finger and BTB domain containing 14	411	PF00651	26..129
	Ficedula albicollis	Chordata	Craniata	Aves	Passeriformes	59894	A0A803W5U8	6.2e-08	36.1	1.1	1.4e-07	35	0.3	2	1	IPR000210(158...265)	unreviewed	BTB domain-containing protein	703	PF00651	158..264
	Fundulus heteroclitus	Chordata	Craniata	Actinopteri	Cyprinodontiformes	8078	A0A3Q2QJD0	5.2e-08	36.4	0.6	1.4e-07	35	0.6	1.8	1	IPR000210(46...152)	unreviewed	Zinc finger and BTB domain-containing protein 14	429	PF00651	46..149
	Gasterosteus aculeatus	Chordata	Craniata	Actinopteri	Perciformes	69293	G3N855	6e-08	36.2	0.6	1.4e-07	35	0.6	1.6	1	IPR000210(20...124)	unreviewed	Zinc finger and BTB domain containing 14	426	PF00651	20..120
	Gasterosteus aculeatus	Chordata	Craniata	Actinopteri	Perciformes	69293	G3N859	6.1e-08	36.2	0.6	1.4e-07	35	0.6	1.6	1	IPR000210(24...128)	unreviewed	Zinc finger and BTB domain containing 14	430	PF00651	24..124
	Hippolais icterina	Chordata	Craniata	Aves	Passeriformes	68497	A0A7L2LAX0	4.9e-08	36.5	2.6	1.4e-07	35	0.9	2.3	1	IPR000210(34...143)	unreviewed	BTB domain-containing protein	302	PF00651	34..142
	Hipposideros armiger	Chordata	Craniata	Mammalia	Chiroptera	186990	A0A8B7SY52	6.4e-08	36.1	0	1.4e-07	35.1	0	1.5	1	IPR000210(50...157)	unreviewed	Kelch-like protein 3	597	PF00651	50..156
	Hipposideros armiger	Chordata	Craniata	Mammalia	Chiroptera	186990	A0A8B7SYL0	6.5e-08	36.1	0	1.4e-07	35	0	1.5	1	IPR000210(54...161)	unreviewed	Kelch-like protein 3	601	PF00651	54..160
	Hylia prasina	Chordata	Craniata	Aves	Passeriformes	208073	A0A7K5W459	4.9e-08	36.5	2.6	1.4e-07	35	0.9	2.3	1	IPR000210(34...143)	unreviewed	BTB domain-containing protein	302	PF00651	34..142
	Lamprotornis superbus	Chordata	Craniata	Aves	Passeriformes	245042	A0A835NG72	5.6e-08	36.3	0	1.4e-07	35	0	1.7	1	IPR000210(54...160)	unreviewed	BTB domain-containing protein	771	PF00651	54..159
	Lates calcarifer	Chordata	Craniata	Actinopteri		8187	A0A4W6EAC7	5.4e-08	36.3	0.6	1.4e-07	35	0.6	1.7	1	IPR000210(20...126)	unreviewed	Zinc finger and BTB domain containing 14	427	PF00651	20..123
	Loxodonta africana	Chordata	Craniata	Mammalia	Proboscidea	9785	G3UDU1	5.8e-08	36.2	0.5	1.4e-07	35.1	0.5	1.6	1	IPR000210(25...131)	unreviewed	Zinc finger and BTB domain containing 14	396	PF00651	25..128
	Lynx pardinus	Chordata	Craniata	Mammalia	Carnivora	191816	A0A485N6R5	6.4e-08	36.1	0.2	1.4e-07	35	0.2	1.5	1	IPR000210(53...160)	unreviewed	BTB domain-containing protein	495	PF00651	53..159
	Lynx pardinus	Chordata	Craniata	Mammalia	Carnivora	191816	A0A485N9I3	6.5e-08	36.1	0.2	1.4e-07	35	0.2	1.5	1	IPR000210(53...160)	unreviewed	BTB domain-containing protein	498	PF00651	53..159
	Mola mola	Chordata	Craniata	Actinopteri	Tetraodontiformes	94237	A0A3Q4AIR3	4.6e-08	36.6	0.6	1.4e-07	35	0.6	1.8	1	IPR000210(25...131)	unreviewed	Uncharacterized protein	414	PF00651	25..126
	Muraenolepis orangiensis	Chordata	Craniata	Actinopteri	Gadiformes	630683	A0A9Q0I451	6.2e-08	36.1	1.1	1.4e-07	35	0.3	2	1	IPR000210(65...172)	unreviewed	BTB domain-containing protein	719	PF00651	65..171
	Onychostoma macrolepis	Chordata	Craniata	Actinopteri	Cypriniformes	369639	A0A7J6DE44	6.8e-08	36	0	1.4e-07	35	0	1.5	1	IPR000210(225...331)	unreviewed	BTB domain-containing protein	775	PF00651	225..330
	Oryzias latipes	Chordata	Craniata	Actinopteri	Beloniformes	8090	H2MZL2	5.8e-08	36.2	0.6	1.4e-07	35	0.6	1.7	1	IPR000210(20...126)	unreviewed	Zinc finger and BTB domain containing 14	427	PF00651	20..123
	Paramuricea clavata	Cnidaria		Anthozoa	Malacalcyonacea	317549	A0A7D9JYC0	5.8e-08	36.2	0.1	1.4e-07	35	0.1	1.7	1	IPR000210(20...127)	unreviewed	Kelch 17, partial	192	PF00651	20..125
	Periophthalmus magnuspinnatus	Chordata	Craniata	Actinopteri	Gobiiformes	409849	A0A3B4BFF8	4.9e-08	36.5	0.6	1.4e-07	35	0.6	1.8	1	IPR000210(20...126)	unreviewed	Uncharacterized protein	431	PF00651	20..123
	Phrynocephalus forsythii	Chordata	Craniata	Lepidosauria	Squamata	171643	A0A9Q1B5X4	4.2e-08	36.7	0.4	1.4e-07	35	0.5	1.9	1	IPR000210(73...179)	unreviewed	BTB domain-containing protein	417	PF00651	73..176
	Pundamilia nyererei	Chordata	Craniata	Actinopteri	Cichliformes	303518	A0A3B4G132	1.4e-07	35	0.2	1.4e-07	35	0.2	2	1	IPR000210(14...112)	unreviewed	Zinc finger and BTB domain containing 17	495	PF00651	14..107
	Quiscalus mexicanus	Chordata	Craniata	Aves	Passeriformes	64278	A0A7L2FKA2	4.9e-08	36.5	2.6	1.4e-07	35	0.9	2.3	1	IPR000210(34...143)	unreviewed	BTB domain-containing protein	302	PF00651	34..142
	Rhinopithecus roxellana	Chordata	Craniata	Mammalia	Primates	61622	A0A2K6PG26	7.1e-08	35.9	0.2	1.4e-07	35	0.2	1.5	1	IPR000210(8...115)	unreviewed	BTB domain-containing protein	507	PF00651	8..114
	Scophthalmus maximus	Chordata	Craniata	Actinopteri	Pleuronectiformes	52904	A0A8D3AHW4	5e-08	36.4	0.6	1.4e-07	35	0.6	1.8	1	IPR000210(20...126)	unreviewed	Zinc finger and BTB domain-containing protein 14	431	PF00651	20..123
	Silurus meridionalis	Chordata	Craniata	Actinopteri	Siluriformes	175797	A0A8T0BU59	4.6e-08	36.5	0.9	1.4e-07	35	0.9	1.9	1	IPR000210(121...227)	unreviewed	BTB domain-containing protein	284	PF00651	121..224
	Sparus aurata	Chordata	Craniata	Actinopteri	Spariformes	8175	A0A671YCB9	3.8e-08	36.8	0.6	1.4e-07	35	0.6	2	1	IPR000210(20...126)	unreviewed	Zinc finger and BTB domain containing 14	415	PF00651	20..124
	Sphaeramia orbicularis	Chordata	Craniata	Actinopteri	Kurtiformes	375764	A0A673ALH5	6.1e-08	36.2	0.6	1.4e-07	35	0.6	1.6	1	IPR000210(20...126)	unreviewed	Zinc finger and BTB domain containing 14	431	PF00651	20..123
	Sus scrofa	Chordata	Craniata	Mammalia	Artiodactyla	9823	A0A8D0QC10	6.7e-08	36	0	1.4e-07	35	0	1.5	1	IPR000210(238...344)	unreviewed	BTB domain-containing protein	788	PF00651	238..343
	Sus scrofa	Chordata	Craniata	Mammalia	Artiodactyla	9823	A0A8D0QC29	6.5e-08	36.1	0	1.4e-07	35	0	1.5	1	IPR000210(238...344)	unreviewed	BTB domain-containing protein	761	PF00651	238..343
	Sus scrofa	Chordata	Craniata	Mammalia	Artiodactyla	9823	A0A8D0Y5X8	6.7e-08	36	0	1.4e-07	35	0	1.5	1	IPR000210(238...344)	unreviewed	BTB domain-containing protein	788	PF00651	238..343
	Sus scrofa	Chordata	Craniata	Mammalia	Artiodactyla	9823	A0A8D0Y936	6.5e-08	36.1	0	1.4e-07	35	0	1.5	1	IPR000210(238...344)	unreviewed	BTB domain-containing protein	761	PF00651	238..343
	Sus scrofa	Chordata	Craniata	Mammalia	Artiodactyla	9823	A0A8D1HNU2	6.7e-08	36	0	1.4e-07	35	0	1.5	1	IPR000210(238...344)	unreviewed	BTB domain-containing protein	788	PF00651	238..343
	Sus scrofa	Chordata	Craniata	Mammalia	Artiodactyla	9823	A0A8D1LH12	6.8e-08	36	0	1.4e-07	35	0	1.5	1	IPR000210(238...344)	unreviewed	BTB domain-containing protein	788	PF00651	238..343
	Sus scrofa	Chordata	Craniata	Mammalia	Artiodactyla	9823	A0A8D1LHB1	6.5e-08	36.1	0	1.4e-07	35	0	1.5	1	IPR000210(238...344)	unreviewed	BTB domain-containing protein	761	PF00651	238..343
	Sus scrofa	Chordata	Craniata	Mammalia	Artiodactyla	9823	A0A8D1V9T4	6.7e-08	36	0	1.4e-07	35	0	1.5	1	IPR000210(238...344)	unreviewed	BTB domain-containing protein	788	PF00651	238..343
	Sus scrofa	Chordata	Craniata	Mammalia	Artiodactyla	9823	A0A8D1VAA7	6.5e-08	36.1	0	1.4e-07	35	0	1.5	1	IPR000210(238...344)	unreviewed	BTB domain-containing protein	761	PF00651	238..343
	Sus scrofa	Chordata	Craniata	Mammalia	Artiodactyla	9823	A0A8D1XFU1	6.5e-08	36.1	0	1.4e-07	35	0	1.5	1	IPR000210(238...344)	unreviewed	BTB domain-containing protein	761	PF00651	238..343
	Takifugu rubripes	Chordata	Craniata	Actinopteri	Tetraodontiformes	31033	H2SBM0	5.5e-08	36.3	0.6	1.4e-07	35	0.6	1.7	1	IPR000210(20...126)	unreviewed	Zinc finger and BTB domain containing 14	426	PF00651	20..122
	Xenopus laevis	Chordata	Craniata	Amphibia	Anura	8355	A0A8J0U561	6.8e-08	36	0.3	1.4e-07	35	0.3	1.5	1	IPR000210(62...169)	unreviewed	BTB domain-containing protein	609	PF00651	62..168
	Xiphophorus maculatus	Chordata	Craniata	Actinopteri	Cyprinodontiformes	8083	A0A3B5QRN3	4.8e-08	36.5	0.6	1.4e-07	35	0.6	1.8	1	IPR000210(20...126)	unreviewed	Zinc finger and BTB domain containing 14	413	PF00651	20..122
	Zosterops borbonicus	Chordata	Craniata	Aves	Passeriformes	364589	A0A8K1GVA5	4.2e-08	36.7	0.4	1.4e-07	35	0.5	1.8	1	IPR000210(97...203)	unreviewed	BTB domain-containing protein	398	PF00651	97..200
	Acanthochromis polyacanthus	Chordata	Craniata	Actinopteri		80966	A0A3Q1GLQ4	6e-08	36.2	0.6	1.5e-07	34.9	0.6	1.7	1	IPR000210(20...126)	unreviewed	Zinc finger and BTB domain containing 14	435	PF00651	20..123
	Acinonyx jubatus	Chordata	Craniata	Mammalia	Carnivora	32536	A0A6J2A3F5	6.9e-08	36	0.2	1.5e-07	34.9	0.2	1.5	1	IPR000210(46...153)	unreviewed	BTB domain-containing protein	527	PF00651	46..152
	Acipenser oxyrinchus	Chordata	Craniata	Actinopteri	Acipenseriformes	40147	A0AAD8GDZ2	4.2e-08	36.7	0.6	1.5e-07	34.9	0.6	2	1	IPR000210(20...126)	unreviewed	Zinc finger and BTB domain-containing protein 14-like	438	PF00651	20..122
	Acipenser oxyrinchus	Chordata	Craniata	Actinopteri	Acipenseriformes	40147	A0AAD8GFY2	4.6e-08	36.6	0.6	1.5e-07	34.9	0.6	1.9	1	IPR000210(20...126)	unreviewed	Zinc finger and BTB domain-containing protein 14-like	443	PF00651	20..122
	Albula glossodonta	Chordata	Craniata	Actinopteri	Albuliformes	121402	A0A8T2P4B7	6e-08	36.2	0	1.5e-07	34.9	0	1.7	1	IPR000210(391...497)	unreviewed	BTB domain-containing protein	848	PF00651	391..491
	Albula goreensis	Chordata	Craniata	Actinopteri	Albuliformes	1534307	A0A8T3DYS6	5.6e-08	36.3	0.6	1.5e-07	34.9	0.6	1.7	1	IPR000210(20...126)	unreviewed	Zinc finger and BTB domain-containing protein 14	444	PF00651	20..122
	Amazona aestiva	Chordata	Craniata	Aves	Psittaciformes	12930	A0A0Q3ML85	5e-08	36.4	0.2	1.5e-07	35	0.2	1.8	1	IPR000210(20...126)	unreviewed	Zinc finger and BTB domain-containing protein 14	442	PF00651	20..123
	Amphilophus citrinellus	Chordata	Craniata	Actinopteri	Cichliformes	61819	A0A3Q0SDM2	4.8e-08	36.5	0.6	1.5e-07	34.9	0.6	1.9	1	IPR000210(26...132)	unreviewed	Zinc finger and BTB domain containing 14	443	PF00651	26..129
	Amphiprion percula	Chordata	Craniata	Actinopteri		161767	A0A3P8RP10	5.9e-08	36.2	0.6	1.5e-07	34.9	0.6	1.7	1	IPR000210(20...126)	unreviewed	Zinc finger and BTB domain containing 14	435	PF00651	20..123
	Anabas testudineus	Chordata	Craniata	Actinopteri	Anabantiformes	64144	A0A3Q1IM92	1.5e-07	34.9	0.6	1.5e-07	34.9	0.6	2.1	1	IPR000210(20...126)	unreviewed	Zinc finger and BTB domain containing 14	445	PF00651	20..123
	Anser cygnoides	Chordata	Craniata	Aves	Anseriformes	8845	A0A8B9E3U6	6.4e-08	36.1	1.1	1.5e-07	35	0.3	2	1	IPR000210(181...288)	unreviewed	BTB domain-containing protein	741	PF00651	181..287
	Aotus nancymaae	Chordata	Craniata	Mammalia	Primates	37293	A0A2K5CQW0	6.7e-08	36	0.5	1.5e-07	34.9	0.5	1.6	1	IPR000210(26...132)	unreviewed	Zinc finger and BTB domain containing 14	432	PF00651	26..130
	Austrofundulus limnaeus	Chordata	Craniata	Actinopteri	Cyprinodontiformes	52670	A0A2I4D0I7	5.6e-08	36.3	0.6	1.5e-07	34.9	0.6	1.7	1	IPR000210(20...126)	unreviewed	Zinc finger and BTB domain-containing protein 14-like	435	PF00651	20..122
	Betta splendens	Chordata	Craniata	Actinopteri	Anabantiformes	158456	A0A6P7MCV8	5.5e-08	36.3	0.6	1.5e-07	34.9	0.6	1.7	1	IPR000210(20...126)	unreviewed	Zinc finger and BTB domain-containing protein 14	435	PF00651	20..123
	Cavia porcellus	Chordata	Craniata	Mammalia	Rodentia	10141	A0A286XS50	6.5e-08	36.1	0.5	1.5e-07	34.9	0.5	1.6	1	IPR000210(20...126)	unreviewed	Zinc finger and BTB domain containing 14	432	PF00651	20..123
	Clupea harengus	Chordata	Craniata	Actinopteri	Clupeiformes	7950	A0A6P3VHT1	5.7e-08	36.3	0.6	1.5e-07	34.9	0.6	1.7	1	IPR000210(20...126)	unreviewed	Zinc finger and BTB domain-containing protein 14	443	PF00651	20..122
	Coregonus sp.	Chordata	Craniata	Actinopteri	Salmoniformes	861768	A0A6F9BY84	4.7e-08	36.5	0.6	1.5e-07	34.9	0.6	1.9	1	IPR000210(20...126)	unreviewed	Zinc finger and BTB domain-containing protein 14	445	PF00651	20..122
	Corvus brachyrhynchos	Chordata	Craniata	Aves	Passeriformes	85066	A0A091EZ36	5e-08	36.4	0.5	1.5e-07	34.9	0.5	1.8	1	IPR000210(26...132)	unreviewed	Zinc finger and BTB domain-containing protein 14	430	PF00651	26..129
	Cyclopterus lumpus	Chordata	Craniata	Actinopteri	Perciformes	8103	A0A8C2Z1L8	5.9e-08	36.2	0.6	1.5e-07	34.9	0.6	1.7	1	IPR000210(20...126)	unreviewed	Zinc finger and BTB domain containing 14	436	PF00651	20..123
	Desmodus rotundus	Chordata	Craniata	Mammalia	Chiroptera	9430	K9IVA0	7e-08	36	0.5	1.5e-07	34.9	0.5	1.6	1	IPR000210(26...132)	unreviewed	Putative c2h2-type zn-finger protein	441	PF00651	26..129
	Dicentrarchus labrax	Chordata	Craniata	Actinopteri		13489	A0A8C4GUY8	5.9e-08	36.2	0.6	1.5e-07	34.9	0.6	1.7	1	IPR000210(20...126)	unreviewed	Zinc finger and BTB domain-containing protein 14	435	PF00651	20..123
	Dicentrarchus labrax	Chordata	Craniata	Actinopteri		13489	A0A8P4G0E1	6.1e-08	36.2	0.6	1.5e-07	34.9	0.6	1.7	1	IPR000210(35...141)	unreviewed	Zinc finger and BTB domain-containing protein 14	450	PF00651	35..138
	Echeneis naucrates	Chordata	Craniata	Actinopteri	Carangiformes	173247	A0A665TWQ5	6e-08	36.2	0.6	1.5e-07	34.9	0.6	1.7	1	IPR000210(20...126)	unreviewed	Zinc finger and BTB domain containing 14	444	PF00651	20..123
	Esox lucius	Chordata	Craniata	Actinopteri	Esociformes	8010	A0A3P8YU09	4.9e-08	36.5	0.6	1.5e-07	34.9	0.6	1.9	1	IPR000210(20...126)	unreviewed	Zinc finger and BTB domain containing 14	443	PF00651	20..122
	Fundulus heteroclitus	Chordata	Craniata	Actinopteri	Cyprinodontiformes	8078	A0A3Q2QJD9	5.3e-08	36.3	0.6	1.5e-07	34.9	0.6	1.8	1	IPR000210(24...130)	unreviewed	Zinc finger and BTB domain containing 14	439	PF00651	24..127
	Gadus morhua	Chordata	Craniata	Actinopteri	Gadiformes	8049	A0A8C4YZI1	5e-08	36.4	0.6	1.5e-07	34.9	0.6	1.8	1	IPR000210(20...126)	unreviewed	Zinc finger and BTB domain-containing protein 14	436	PF00651	20..123
	Haplochromis burtoni	Chordata	Craniata	Actinopteri	Cichliformes	8153	A0A3Q2VEM0	5.6e-08	36.3	0.6	1.5e-07	35	0.6	1.7	1	IPR000210(20...126)	unreviewed	Zinc finger and BTB domain containing 14	433	PF00651	20..123
	Hippocampus comes	Chordata	Craniata	Actinopteri	Syngnathiformes	109280	A0A3Q3D981	5.5e-08	36.3	0.6	1.5e-07	34.9	0.6	1.7	1	IPR000210(20...126)	unreviewed	Zinc finger and BTB domain containing 14	434	PF00651	20..122
	Hucho hucho	Chordata	Craniata	Actinopteri	Salmoniformes	62062	A0A4W5KP99	4.6e-08	36.5	0.6	1.5e-07	34.9	0.6	1.9	1	IPR000210(20...126)	unreviewed	Zinc finger and BTB domain containing 14	445	PF00651	20..122
	Hydra vulgaris	Cnidaria		Hydrozoa	Anthoathecata	6087	T2M386	7.2e-08	35.9	0.2	1.5e-07	34.9	0.2	1.5	1	IPR000210(241...348)	unreviewed	BTB domain-containing protein	794	PF00651	241..347
	Iconisemion striatum	Chordata	Craniata	Actinopteri	Cyprinodontiformes	60296	A0A1A7YAL3	5.4e-08	36.3	0.6	1.5e-07	35	0.6	1.7	1	IPR000210(20...126)	unreviewed	Zinc finger and BTB domain containing 14	433	PF00651	20..123
	Labrus bergylta	Chordata	Craniata	Actinopteri	Labriformes	56723	A0A3Q3GIY7	5.3e-08	36.4	0.6	1.5e-07	34.9	0.6	1.8	1	IPR000210(20...126)	unreviewed	Zinc finger and BTB domain containing 14	435	PF00651	20..123
	Larimichthys crocea	Chordata	Craniata	Actinopteri		215358	A0A6G0HK26	5.9e-08	36.2	0.6	1.5e-07	35	0.6	1.7	1	IPR000210(20...126)	unreviewed	Zinc finger and BTB domain-containing protein 14	433	PF00651	20..123
	Lates calcarifer	Chordata	Craniata	Actinopteri		8187	A0A4W6EBP4	5.8e-08	36.2	0.6	1.5e-07	34.9	0.6	1.7	1	IPR000210(20...126)	unreviewed	Zinc finger and BTB domain containing 14	435	PF00651	20..123
	Lepisosteus oculatus	Chordata	Craniata	Actinopteri	Semionotiformes	7918	W5NMQ5	5.9e-08	36.2	0.6	1.5e-07	34.9	0.6	1.7	1	IPR000210(21...127)	unreviewed	Zinc finger and BTB domain containing 14	445	PF00651	21..123
	Limosa lapponica	Chordata	Craniata	Aves	Charadriiformes	1758121	A0A2I0TMY5	1.5e-07	34.9	0.5	1.5e-07	34.9	0.5	1.8	1	IPR000210(48...149)	unreviewed	BTB domain-containing protein	390	PF00651	48..91
	Lynx pardinus	Chordata	Craniata	Mammalia	Carnivora	191816	A0A485NAA4	7.1e-08	36	0.2	1.5e-07	34.9	0.2	1.5	1	IPR000210(53...160)	unreviewed	BTB domain-containing protein	534	PF00651	53..159
	Marmota monax	Chordata	Craniata	Mammalia	Rodentia	9995	A0A5E4BCC8	1.2e-07	35.3	1.8	1.5e-07	34.9	0.2	2	1	IPR000210(31...137)	unreviewed	BTB domain-containing protein	400	PF00651	31..136
	Mastacembelus armatus	Chordata	Craniata	Actinopteri	Synbranchiformes	205130	A0A3Q3MSA5	4.9e-08	36.5	0.6	1.5e-07	34.9	0.6	1.8	1	IPR000210(20...126)	unreviewed	Zinc finger and BTB domain containing 14	435	PF00651	20..123
	Maylandia zebra	Chordata	Craniata	Actinopteri	Cichliformes	106582	A0A3P9CYE2	5.6e-08	36.3	0.6	1.5e-07	35	0.6	1.7	1	IPR000210(20...126)	unreviewed	Zinc finger and BTB domain containing 14	433	PF00651	20..123
	Merluccius polli	Chordata	Craniata	Actinopteri	Gadiformes	89951	A0AA47M5X5	5e-08	36.4	0.6	1.5e-07	34.9	0.6	1.8	1	IPR000210(20...126)	unreviewed	Zinc finger and BTB domain-containing protein 14	438	PF00651	20..122
	Micrurus lemniscatus	Chordata	Craniata	Lepidosauria	Squamata	129467	A0A2D4JL98	1.5e-07	34.9	0.1	1.5e-07	34.9	0.1	1.7	1	IPR000210(17...119)	unreviewed	BTB domain-containing protein	154	PF00651	17..113
	Micrurus lemniscatus	Chordata	Craniata	Lepidosauria	Squamata	129465	A0A2H6MVN1	1.5e-07	34.9	0.2	1.5e-07	34.9	0.2	2	1	IPR000210(1...95)	unreviewed	BTB domain-containing protein	125	PF00651	1..94
	Monopterus albus	Chordata	Craniata	Actinopteri	Synbranchiformes	43700	A0A3Q3JGR5	5.8e-08	36.2	0.6	1.5e-07	34.9	0.6	1.7	1	IPR000210(20...126)	unreviewed	Zinc finger and BTB domain containing 14	447	PF00651	20..123
	Myripristis murdjan	Chordata	Craniata	Actinopteri	Holocentriformes	586833	A0A667WZT5	4.2e-08	36.7	0.6	1.5e-07	34.9	0.6	2	1	IPR000210(24...130)	unreviewed	Zinc finger and BTB domain containing 14	441	PF00651	24..127
	Myripristis murdjan	Chordata	Craniata	Actinopteri	Holocentriformes	586833	A0A667XDU0	4.7e-08	36.5	0.6	1.5e-07	34.9	0.6	1.9	1	IPR000210(26...132)	unreviewed	Zinc finger and BTB domain containing 14	443	PF00651	26..129
	Nothobranchius furzeri	Chordata	Craniata	Actinopteri	Cyprinodontiformes	105023	A0A1A8VE66	5.7e-08	36.3	0.6	1.5e-07	34.9	0.6	1.7	1	IPR000210(20...126)	unreviewed	Zinc finger and BTB domain containing 14	434	PF00651	20..122
	Nothobranchius kadleci	Chordata	Craniata	Actinopteri	Cyprinodontiformes	1051664	A0A1A8E688	5.7e-08	36.3	0.6	1.5e-07	34.9	0.6	1.7	1	IPR000210(20...126)	unreviewed	Zinc finger and BTB domain containing 14	434	PF00651	20..122
	Nothobranchius korthausae	Chordata	Craniata	Actinopteri	Cyprinodontiformes	1143690	A0A1A8FPC9	5.7e-08	36.3	0.6	1.5e-07	34.9	0.6	1.7	1	IPR000210(20...126)	unreviewed	Zinc finger and BTB domain containing 14	434	PF00651	20..122
	Nothobranchius kuhntae	Chordata	Craniata	Actinopteri	Cyprinodontiformes	321403	A0A1A8KA30	5.7e-08	36.3	0.6	1.5e-07	34.9	0.6	1.7	1	IPR000210(20...126)	unreviewed	Zinc finger and BTB domain containing 14	434	PF00651	20..122
	Nothobranchius rachovii	Chordata	Craniata	Actinopteri	Cyprinodontiformes	451742	A0A1A8QVA1	5.7e-08	36.3	0.6	1.5e-07	34.9	0.6	1.7	1	IPR000210(20...126)	unreviewed	Zinc finger and BTB domain containing 14	434	PF00651	20..122
	Octodon degus	Chordata	Craniata	Mammalia	Rodentia	10160	A0A6P6EED0	7.3e-08	35.9	0.2	1.5e-07	34.9	0.2	1.5	1	IPR000210(8...115)	unreviewed	BTB domain-containing protein	521	PF00651	8..114
	Oncorhynchus mykiss	Chordata	Craniata	Actinopteri	Salmoniformes	8022	A0A8K9V0Y3	6e-08	36.2	1.1	1.5e-07	34.9	0.3	2.1	1	IPR000210(31...138)	unreviewed	BTB domain-containing protein	780	PF00651	31..137
	Oreochromis niloticus	Chordata	Craniata	Actinopteri	Cichliformes	8128	I3JU64	5.9e-08	36.2	0.6	1.5e-07	34.9	0.6	1.7	1	IPR000210(40...146)	unreviewed	Zinc finger and BTB domain containing 14	455	PF00651	40..143
	Oryzias melastigma	Chordata	Craniata	Actinopteri	Beloniformes	30732	A0A834F218	5.8e-08	36.2	0.6	1.5e-07	34.9	0.6	1.7	1	IPR000210(20...126)	unreviewed	Zinc finger and BTB domain containing 14	435	PF00651	20..123
	Panthera pardus	Chordata	Craniata	Mammalia	Carnivora	9691	A0A9V1F6D9	6.9e-08	36	0.2	1.5e-07	34.9	0.2	1.5	1	IPR000210(46...153)	unreviewed	BTB domain-containing protein	527	PF00651	46..152
	Parambassis ranga	Chordata	Craniata	Actinopteri		210632	A0A6P7KJF3	4.9e-08	36.5	0.6	1.5e-07	34.9	0.6	1.8	1	IPR000210(20...126)	unreviewed	Zinc finger and BTB domain-containing protein 14 isoform X2	435	PF00651	20..123
	Parambassis ranga	Chordata	Craniata	Actinopteri		210632	A0A6P7KLX2	4.9e-08	36.5	0.6	1.5e-07	34.9	0.6	1.8	1	IPR000210(20...126)	unreviewed	Zinc finger and BTB domain-containing protein 14 isoform X1	439	PF00651	20..123
	Poecilia formosa	Chordata	Craniata	Actinopteri	Cyprinodontiformes	48698	A0A087XTD6	5.2e-08	36.4	0.6	1.5e-07	34.9	0.6	1.8	1	IPR000210(20...126)	unreviewed	Zinc finger and BTB domain containing 14	435	PF00651	20..123
	Poecilia latipinna	Chordata	Craniata	Actinopteri	Cyprinodontiformes	48699	A0A3B3UX11	5.2e-08	36.4	0.6	1.5e-07	34.9	0.6	1.8	1	IPR000210(20...126)	unreviewed	Zinc finger and BTB domain containing 14	435	PF00651	20..123
	Poecilia mexicana	Chordata	Craniata	Actinopteri	Cyprinodontiformes	48701	A0A3B3WY10	5.2e-08	36.4	0.6	1.5e-07	34.9	0.6	1.8	1	IPR000210(20...126)	unreviewed	Zinc finger and BTB domain containing 14	435	PF00651	20..123
	Polypterus senegalus	Chordata	Craniata	Cladistia	Polypteriformes	55291	A0A8X8BKY0	5.9e-08	36.2	0.5	1.5e-07	34.9	0.5	1.7	1	IPR000210(20...126)	unreviewed	Zinc finger and BTB domain containing 14	444	PF00651	20..125
	Salarias fasciatus	Chordata	Craniata	Actinopteri	Blenniiformes	181472	A0A672F7Z0	5.7e-08	36.3	0.6	1.5e-07	34.9	0.6	1.7	1	IPR000210(20...126)	unreviewed	Zinc finger and BTB domain containing 14	435	PF00651	20..122
	Salmo salar	Chordata	Craniata	Actinopteri	Salmoniformes	8030	A0A1S3NIG1	4.7e-08	36.5	0.6	1.5e-07	34.9	0.6	1.9	1	IPR000210(20...126)	unreviewed	Zinc finger and BTB domain-containing protein 14-like	445	PF00651	20..122
	Salmo salar	Chordata	Craniata	Actinopteri	Salmoniformes	8030	A0A1S3Q9Q9	4.6e-08	36.5	0.6	1.5e-07	34.9	0.6	1.9	1	IPR000210(20...126)	unreviewed	Zinc finger and BTB domain-containing protein 14-like	443	PF00651	20..122
	Salmo trutta	Chordata	Craniata	Actinopteri	Salmoniformes	8032	A0A673YFM8	4.8e-08	36.5	0.6	1.5e-07	34.9	0.6	1.9	1	IPR000210(20...126)	unreviewed	Zinc finger and BTB domain containing 14	440	PF00651	20..122
	Salvelinus namaycush	Chordata	Craniata	Actinopteri	Salmoniformes	8040	A0A8U0UHW9	4.8e-08	36.5	0.6	1.5e-07	34.9	0.6	1.9	1	IPR000210(20...126)	unreviewed	Zinc finger and BTB domain-containing protein 14	443	PF00651	20..122
	Sander lucioperca	Chordata	Craniata	Actinopteri	Perciformes	283035	A0A8C9XTV1	5.1e-08	36.4	0.6	1.5e-07	34.9	0.6	1.8	1	IPR000210(20...126)	unreviewed	Zinc finger and BTB domain containing 14	435	PF00651	20..123
	Sapajus apella	Chordata	Craniata	Mammalia	Primates	9515	A0A6J3H0V9	7.3e-08	35.9	0.2	1.5e-07	34.9	0.2	1.5	1	IPR000210(46...153)	unreviewed	BTB domain-containing protein	537	PF00651	46..152
	Scleropages formosus	Chordata	Craniata	Actinopteri	Osteoglossiformes	113540	A0A0P7VAQ1	5.4e-08	36.3	0.6	1.5e-07	34.9	0.6	1.8	1	IPR000210(20...126)	unreviewed	Zinc finger and BTB domain containing 14	445	PF00651	20..122
	Scyliorhinus torazame	Chordata	Craniata	Chondrichthyes	Carcharhiniformes	75743	A0A401NMY8	7.1e-08	36	0.1	1.5e-07	34.9	0.1	1.6	1	IPR000210(45...147)	unreviewed	Zinc finger and BTB domain-containing protein 17	834	PF00651	45..144
	Seriola dumerili	Chordata	Craniata	Actinopteri	Carangiformes	41447	A0A3B4U688	5.8e-08	36.2	0.6	1.5e-07	34.9	0.6	1.7	1	IPR000210(20...126)	unreviewed	Zinc finger and BTB domain containing 14	434	PF00651	20..123
	Seriola lalandi	Chordata	Craniata	Actinopteri	Carangiformes	1841481	A0A3B4X2N6	5.6e-08	36.3	0.6	1.5e-07	34.9	0.6	1.7	1	IPR000210(22...128)	unreviewed	Zinc finger and BTB domain containing 14	437	PF00651	22..125
	Spermophilus dauricus	Chordata	Craniata	Mammalia	Rodentia	99837	A0A8C9UPT1	6.6e-08	36.1	0.5	1.5e-07	35	0.5	1.6	1	IPR000210(24...130)	unreviewed	Zinc finger and BTB domain-containing protein 14	419	PF00651	24..127
	Sphaeramia orbicularis	Chordata	Craniata	Actinopteri	Kurtiformes	375764	A0A673AIP9	5.9e-08	36.2	0.6	1.5e-07	34.9	0.6	1.7	1	IPR000210(24...130)	unreviewed	Zinc finger and BTB domain containing 14	438	PF00651	24..127
	Stegastes partitus	Chordata	Craniata	Actinopteri		144197	A0A3B5B1C4	5.8e-08	36.2	0.6	1.5e-07	34.9	0.6	1.7	1	IPR000210(20...126)	unreviewed	Zinc finger and BTB domain containing 14	435	PF00651	20..123
	Stegastes partitus	Chordata	Craniata	Actinopteri		144197	A0A9Y4TSV6	6e-08	36.2	0.6	1.5e-07	34.9	0.6	1.7	1	IPR000210(27...133)	unreviewed	Zinc finger and BTB domain containing 14	442	PF00651	27..130
	Suricata suricatta	Chordata	Craniata	Mammalia	Carnivora	37032	A0A673SLZ1	7.7e-08	35.8	0.2	1.5e-07	34.9	0.2	1.5	1	IPR000210(40...147)	unreviewed	BTB domain-containing protein	537	PF00651	40..146
	Sus scrofa	Chordata	Craniata	Mammalia	Artiodactyla	9823	A0A8D0HRL8	6.8e-08	36	0.5	1.5e-07	34.9	0.5	1.6	1	IPR000210(26...132)	unreviewed	Zinc finger and BTB domain-containing protein 14	433	PF00651	26..129
	Synaphobranchus kaupii	Chordata	Craniata	Actinopteri	Anguilliformes	118154	A0A9Q1EE58	5.9e-08	36.2	0.6	1.5e-07	34.9	0.6	1.7	1	IPR000210(20...126)	unreviewed	Zinc finger and BTB domain-containing protein 14	444	PF00651	20..122
	Tetraodon nigroviridis	Chordata	Craniata	Actinopteri	Tetraodontiformes	99883	H3CFJ1	4.9e-08	36.4	0.6	1.5e-07	34.9	0.6	1.8	1	IPR000210(22...128)	unreviewed	Zinc finger and BTB domain containing 14	439	PF00651	22..125
	Trichechus manatus	Chordata	Craniata	Mammalia	Sirenia	127582	A0A2Y9QPV9	7.1e-08	35.9	0.2	1.5e-07	34.9	0.2	1.5	1	IPR000210(40...147)	unreviewed	BTB domain-containing protein	521	PF00651	40..146
	Upupa epops	Chordata	Craniata	Aves	Upupiformes	57439	A0A7K6B484	6.9e-08	36	0.1	1.5e-07	34.9	0.1	1.5	1	IPR000210(4...105)	unreviewed	BTB domain-containing protein	498	PF00651	4..104
	Xiphorhynchus elegans	Chordata	Craniata	Aves	Passeriformes	269412	A0A7L3PLN8	7.3e-08	35.9	0.1	1.5e-07	34.9	0.1	1.5	1	IPR000210(14...113)	unreviewed	BTB domain-containing protein	113	PF00651	14..110
	Zalophus californianus	Chordata	Craniata	Mammalia	Carnivora	9704	A0A6J2DIZ3	7.6e-08	35.9	0.2	1.5e-07	34.9	0.2	1.5	1	IPR000210(1...89)	unreviewed	BTB domain-containing protein	529	PF00651	2..88
	Acanthisitta chloris	Chordata	Craniata	Aves	Passeriformes	57068	A0A091N745	5.6e-08	36.3	0.5	1.6e-07	34.8	0.5	1.8	1	IPR000210(26...132)	unreviewed	Zinc finger and BTB domain-containing protein 14	448	PF00651	26..129
	Accipiter nisus	Chordata	Craniata	Aves	Accipitriformes	211598	A0A8B9NR31	5.2e-08	36.4	0.5	1.6e-07	34.8	0.5	1.8	1	IPR000210(26...132)	unreviewed	Zinc finger and BTB domain-containing protein 14	448	PF00651	26..129
	Acinonyx jubatus	Chordata	Craniata	Mammalia	Carnivora	32536	A0A6J2A3A4	7.4e-08	35.9	0.2	1.6e-07	34.8	0.2	1.5	1	IPR000210(46...153)	unreviewed	BTB domain-containing protein	545	PF00651	46..152
	Acinonyx jubatus	Chordata	Craniata	Mammalia	Carnivora	32536	A0A6J2A3I5	7e-08	36	0.5	1.6e-07	34.8	0.5	1.6	1	IPR000210(26...132)	unreviewed	Zinc finger and BTB domain-containing protein 14	449	PF00651	26..129
	Acinonyx jubatus	Chordata	Craniata	Mammalia	Carnivora	32536	A0A6J2A4F5	7.5e-08	35.9	0.2	1.6e-07	34.8	0.2	1.5	1	IPR000210(46...153)	unreviewed	BTB domain-containing protein	554	PF00651	46..152
	Acrocephalus arundinaceus	Chordata	Craniata	Aves	Passeriformes	39621	A0A7K7PIA2	5.2e-08	36.4	0.5	1.6e-07	34.8	0.5	1.9	1	IPR000210(25...131)	unreviewed	ZBT14 protein	447	PF00651	25..128
	Acropora cervicornis	Cnidaria		Anthozoa	Scleractinia	6130	A0AAD9V6Y4	8.9e-08	35.6	0	1.6e-07	34.8	0	1.4	1	IPR000210(26...131)	unreviewed	Kelch-like protein 8	584	PF00651	26..130
	Aegithalos caudatus	Chordata	Craniata	Aves	Passeriformes	73327	A0A850XUC5	5.2e-08	36.4	0.5	1.6e-07	34.8	0.5	1.9	1	IPR000210(25...131)	unreviewed	ZBT14 protein	447	PF00651	25..128
	Aegotheles bennettii	Chordata	Craniata	Aves	Caprimulgiformes	48278	A0A7K6ULC2	1.6e-07	34.8	0.5	1.6e-07	34.8	0.5	2.4	1	IPR000210(25...131)	unreviewed	ZBT14 protein	447	PF00651	25..128
	Agelaius phoeniceus	Chordata	Craniata	Aves	Passeriformes	39638	A0A7K7KB43	5.2e-08	36.4	0.5	1.6e-07	34.8	0.5	1.9	1	IPR000210(25...131)	unreviewed	ZBT14 protein	447	PF00651	25..128
	Ailuropoda melanoleuca	Chordata	Craniata	Mammalia	Carnivora	9646	D2HQW1	6.8e-08	36	0.5	1.6e-07	34.8	0.5	1.6	1	IPR000210(25...131)	unreviewed	Uncharacterized protein	448	PF00651	25..128
	Ailuropoda melanoleuca	Chordata	Craniata	Mammalia	Carnivora	9646	G1MNW8	6.8e-08	36	0.5	1.6e-07	34.8	0.5	1.6	1	IPR000210(26...132)	unreviewed	Zinc finger and BTB domain containing 14	449	PF00651	26..129
	Alaudala cheleensis	Chordata	Craniata	Aves	Passeriformes	670337	A0A7L2C376	5.2e-08	36.4	0.5	1.6e-07	34.8	0.5	1.9	1	IPR000210(25...131)	unreviewed	ZBT14 protein	447	PF00651	25..128
	Alca torda	Chordata	Craniata	Aves	Charadriiformes	28689	A0A7K6Z1T6	5.2e-08	36.4	0.5	1.6e-07	34.8	0.5	1.8	1	IPR000210(25...131)	unreviewed	ZBT14 protein	447	PF00651	25..128
	Aleadryas rufinucha	Chordata	Craniata	Aves	Passeriformes	461220	A0A7K8HMD7	5.2e-08	36.4	0.5	1.6e-07	34.8	0.5	1.9	1	IPR000210(25...131)	unreviewed	ZBT14 protein	447	PF00651	25..128
	Alectura lathami	Chordata	Craniata	Aves	Galliformes	81907	A0A7L0W8Z7	5.2e-08	36.4	0.5	1.6e-07	34.8	0.5	1.8	1	IPR000210(25...131)	unreviewed	ZBT14 protein	447	PF00651	25..128
	Alligator mississippiensis	Chordata	Craniata		Crocodylia	8496	A0A151NEP4	5.2e-08	36.4	0.5	1.6e-07	34.8	0.5	1.9	1	IPR000210(26...132)	unreviewed	Zinc finger and BTB domain-containing protein 14	448	PF00651	26..129
	Alligator sinensis	Chordata	Craniata		Crocodylia	38654	A0A3Q0H4T6	5.2e-08	36.4	0.5	1.6e-07	34.8	0.5	1.9	1	IPR000210(26...132)	unreviewed	Zinc finger and BTB domain-containing protein 14	448	PF00651	26..129
	Alopecoenas beccarii	Chordata	Craniata	Aves	Columbiformes	262131	A0A7L4FFP2	5.1e-08	36.4	0.5	1.6e-07	34.8	0.5	1.9	1	IPR000210(25...131)	unreviewed	ZBT14 protein	447	PF00651	25..128
	Amazona collaria	Chordata	Craniata	Aves	Psittaciformes	241587	A0A8B9FT54	5.3e-08	36.4	0.5	1.6e-07	34.8	0.5	1.8	1	IPR000210(26...132)	unreviewed	Zinc finger and BTB domain-containing protein 14	448	PF00651	26..129
	Amazona guildingii	Chordata	Craniata	Aves	Psittaciformes	175529	A0A7L0MUT2	5.3e-08	36.4	0.5	1.6e-07	34.8	0.5	1.8	1	IPR000210(25...131)	unreviewed	ZBT14 protein	447	PF00651	25..128
	Anas platyrhynchos	Chordata	Craniata	Aves	Anseriformes	8839	A0A8B9TPI7	5.4e-08	36.3	0.5	1.6e-07	34.8	0.5	1.8	1	IPR000210(26...132)	unreviewed	Zinc finger and BTB domain-containing protein 14	448	PF00651	26..129
	Anas platyrhynchos	Chordata	Craniata	Aves	Anseriformes	8839	R0KFB5	5.4e-08	36.3	0.5	1.6e-07	34.8	0.5	1.8	1	IPR000210(26...132)	unreviewed	Zinc finger protein 161-like protein	448	PF00651	26..129
	Anas platyrhynchos	Chordata	Craniata	Aves	Anseriformes	8840	U3IVL5	5.4e-08	36.3	0.5	1.6e-07	34.8	0.5	1.8	1	IPR000210(26...132)	unreviewed	Zinc finger and BTB domain containing 14	448	PF00651	26..129
	Anas zonorhyncha	Chordata	Craniata	Aves	Anseriformes	75864	A0A8B9UIK5	5.4e-08	36.3	0.5	1.6e-07	34.8	0.5	1.8	1	IPR000210(26...132)	unreviewed	Zinc finger and BTB domain-containing protein 14	448	PF00651	26..129
	Anhinga anhinga	Chordata	Craniata	Aves	Suliformes	56067	A0A851PC10	5.2e-08	36.4	0.5	1.6e-07	34.8	0.5	1.8	1	IPR000210(25...131)	unreviewed	ZBT14 protein	447	PF00651	25..128
	Anhinga rufa	Chordata	Craniata	Aves	Suliformes	317792	A0A7L3G2J9	5.2e-08	36.4	0.5	1.6e-07	34.8	0.5	1.8	1	IPR000210(25...131)	unreviewed	ZBT14 protein	447	PF00651	25..128
	Anolis carolinensis	Chordata	Craniata	Lepidosauria	Squamata	28377	G1KJ47	5.2e-08	36.4	0.5	1.6e-07	34.8	0.5	1.8	1	IPR000210(26...132)	unreviewed	Zinc finger and BTB domain containing 14	448	PF00651	26..129
	Anser brachyrhynchus	Chordata	Craniata	Aves	Anseriformes	132585	A0A8B9BR15	7.4e-08	35.9	1.1	1.6e-07	34.8	0.3	2	1	IPR000210(248...355)	unreviewed	BTB domain-containing protein	808	PF00651	248..354
	Anser brachyrhynchus	Chordata	Craniata	Aves	Anseriformes	132585	A0A8B9BRL1	6e-08	36.2	1.1	1.6e-07	34.8	0.3	2.2	1	IPR000210(120...227)	unreviewed	BTB domain-containing protein	816	PF00651	120..226
	Anser brachyrhynchus	Chordata	Craniata	Aves	Anseriformes	132585	A0A8B9CKE0	5.4e-08	36.3	0.5	1.6e-07	34.8	0.5	1.8	1	IPR000210(26...132)	unreviewed	Zinc finger and BTB domain containing 14	448	PF00651	26..129
	Anser cygnoides	Chordata	Craniata	Aves	Anseriformes	8845	A0A8B9DH62	5.4e-08	36.3	0.5	1.6e-07	34.8	0.5	1.8	1	IPR000210(26...132)	unreviewed	Zinc finger and BTB domain-containing protein 14	448	PF00651	26..129
	Anser cygnoides	Chordata	Craniata	Aves	Anseriformes	8845	A0A8B9E1B1	5.5e-08	36.3	1.2	1.6e-07	34.8	0.3	2.3	1	IPR000210(242...349)	unreviewed	BTB domain-containing protein	802	PF00651	242..348
	Anser cygnoides	Chordata	Craniata	Aves	Anseriformes	8845	A0A8B9E1B7	6e-08	36.2	1.1	1.6e-07	34.8	0.3	2.2	1	IPR000210(120...227)	unreviewed	BTB domain-containing protein	816	PF00651	120..226
	Anseranas semipalmata	Chordata	Craniata	Aves	Anseriformes	8851	A0A7K9UXD3	5.2e-08	36.4	0.5	1.6e-07	34.8	0.5	1.8	1	IPR000210(25...131)	unreviewed	ZBT14 protein	447	PF00651	25..128
	Anthoscopus minutus	Chordata	Craniata	Aves	Passeriformes	156561	A0A7L2EDR6	5.2e-08	36.4	0.5	1.6e-07	34.8	0.5	1.9	1	IPR000210(25...131)	unreviewed	ZBT14 protein	447	PF00651	25..128
	Antrostomus carolinensis	Chordata	Craniata	Aves	Caprimulgiformes	279965	A0A094KJC1	5.2e-08	36.4	0.5	1.6e-07	34.8	0.5	1.9	1	IPR000210(26...132)	unreviewed	Zinc finger and BTB domain-containing protein 14	448	PF00651	26..129
	Aotus nancymaae	Chordata	Craniata	Mammalia	Primates	37293	A0A2K5EQL8	6.8e-08	36	0.5	1.6e-07	34.8	0.5	1.6	1	IPR000210(26...132)	unreviewed	Zinc finger and BTB domain containing 14	449	PF00651	26..129
	Aphelocoma coerulescens	Chordata	Craniata	Aves	Passeriformes	39617	A0A7K7BS97	5.2e-08	36.4	0.5	1.6e-07	34.8	0.5	1.9	1	IPR000210(25...131)	unreviewed	ZBT14 protein	447	PF00651	25..128
	Aptenodytes forsteri	Chordata	Craniata	Aves	Sphenisciformes	9233	A0A087RBG4	5.5e-08	36.3	0.5	1.6e-07	34.8	0.5	1.8	1	IPR000210(26...132)	unreviewed	Zinc finger and BTB domain-containing protein 14	448	PF00651	26..129
	Aptenodytes patagonicus	Chordata	Craniata	Aves	Sphenisciformes	9234	A0A8J4P8I7	5.2e-08	36.4	0.5	1.6e-07	34.8	0.5	1.8	1	IPR000210(25...131)	unreviewed	ZBT14 protein	447	PF00651	25..128
	Aquila chrysaetos	Chordata	Craniata	Aves	Accipitriformes	223781	A0A663EHB0	5.2e-08	36.4	0.5	1.6e-07	34.8	0.5	1.8	1	IPR000210(26...132)	unreviewed	Zinc finger and BTB domain containing 14	448	PF00651	26..129
	Aramus guarauna	Chordata	Craniata	Aves	Gruiformes	54356	A0A7L1SEM2	5.2e-08	36.4	0.5	1.6e-07	34.8	0.5	1.8	1	IPR000210(25...131)	unreviewed	ZBT14 protein	447	PF00651	25..128
	Ardeotis kori	Chordata	Craniata	Aves	Gruiformes	89386	A0A7K8L2P2	5.2e-08	36.4	0.5	1.6e-07	34.8	0.5	1.8	1	IPR000210(25...131)	unreviewed	ZBT14 protein	447	PF00651	25..128
	Arenaria interpres	Chordata	Craniata	Aves	Charadriiformes	54971	A0A7L0HSW4	5.3e-08	36.4	0.5	1.6e-07	34.8	0.5	1.8	1	IPR000210(25...131)	unreviewed	ZBT14 protein	447	PF00651	25..128
	Asarcornis scutulata	Chordata	Craniata	Aves	Anseriformes	75869	A0A7K7KYB6	5.4e-08	36.3	0.5	1.6e-07	34.8	0.5	1.8	1	IPR000210(25...131)	unreviewed	ZBT14 protein	447	PF00651	25..128
	Astatotilapia calliptera	Chordata	Craniata	Actinopteri	Cichliformes	8154	A0A3P8P583	5.9e-08	36.2	0	1.6e-07	34.8	0	1.8	1	IPR000210(20...119)	unreviewed	Zinc finger and BTB domain containing 14	315	PF00651	20..97
	Athene cunicularia	Chordata	Craniata	Aves	Strigiformes	194338	A0A663M7B9	5.2e-08	36.4	0.5	1.6e-07	34.8	0.5	1.8	1	IPR000210(26...132)	unreviewed	Zinc finger and BTB domain containing 14	448	PF00651	26..129
	Atlantisia rogersi	Chordata	Craniata	Aves	Gruiformes	2478892	A0A7L3X2X6	5.2e-08	36.4	0.5	1.6e-07	34.8	0.5	1.8	1	IPR000210(25...131)	unreviewed	ZBT14 protein	447	PF00651	25..128
	Atrichornis clamosus	Chordata	Craniata	Aves	Passeriformes	449594	A0A852P739	5.2e-08	36.4	0.5	1.6e-07	34.8	0.5	1.8	1	IPR000210(25...131)	unreviewed	ZBT14 protein	447	PF00651	25..128
	Aythya fuligula	Chordata	Craniata	Aves	Anseriformes	219594	A0A6J3CKQ9	5.4e-08	36.3	0.5	1.6e-07	34.8	0.5	1.8	1	IPR000210(26...132)	unreviewed	Zinc finger and BTB domain-containing protein 14 isoform X1	448	PF00651	26..129
	Balaeniceps rex	Chordata	Craniata	Aves	Pelecaniformes	33584	A0A7L2U7V7	5.2e-08	36.4	0.5	1.6e-07	34.8	0.5	1.8	1	IPR000210(25...131)	unreviewed	ZBT14 protein	447	PF00651	25..128
	Balaenoptera acutorostrata	Chordata	Craniata	Mammalia	Artiodactyla	310752	A0A383ZNV1	8e-08	35.8	0.2	1.6e-07	34.8	0.2	1.5	1	IPR000210(8...115)	unreviewed	BTB domain-containing protein	555	PF00651	8..114
	Balaenoptera acutorostrata	Chordata	Craniata	Mammalia	Artiodactyla	310752	A0A384AW93	6.8e-08	36	0.5	1.6e-07	34.8	0.5	1.6	1	IPR000210(26...132)	unreviewed	Zinc finger and BTB domain-containing protein 14	449	PF00651	26..129
	Balaenoptera musculus	Chordata	Craniata	Mammalia	Artiodactyla	9771	A0A8B8XHI9	7.8e-08	35.8	0.2	1.6e-07	34.8	0.2	1.5	1	IPR000210(4...106)	unreviewed	BTB domain-containing protein	546	PF00651	4..105
	Balaenoptera musculus	Chordata	Craniata	Mammalia	Artiodactyla	9771	A0A8B8Z774	6.9e-08	36	0.5	1.6e-07	34.8	0.5	1.6	1	IPR000210(26...132)	unreviewed	Zinc finger and BTB domain-containing protein 14	449	PF00651	26..129
	Bambusicola thoracicus	Chordata	Craniata	Aves	Galliformes	9083	A0A2P4SJM7	5.5e-08	36.3	0.5	1.6e-07	34.8	0.5	1.8	1	IPR000210(25...131)	unreviewed	ZBT14 protein	447	PF00651	25..128
	Baryphthengus martii	Chordata	Craniata	Aves	Coraciiformes	176943	A0A7K9DYF9	5.2e-08	36.4	0.5	1.6e-07	34.8	0.5	1.8	1	IPR000210(25...131)	unreviewed	ZBT14 protein	447	PF00651	25..128
	Betta splendens	Chordata	Craniata	Actinopteri	Anabantiformes	158456	A0A6P7MAZ6	6.1e-08	36.1	0.6	1.6e-07	34.8	0.6	1.7	1	IPR000210(50...156)	unreviewed	Zinc finger and BTB domain-containing protein 14 isoform X1	465	PF00651	50..153
	Bison bison	Chordata	Craniata	Mammalia	Artiodactyla	43346	A0A6P3H063	8e-08	35.8	0.2	1.6e-07	34.8	0.2	1.5	1	IPR000210(8...115)	unreviewed	BTB domain-containing protein	555	PF00651	8..114
	Bison bison	Chordata	Craniata	Mammalia	Artiodactyla	43346	A0A6P3J269	6.8e-08	36	0.5	1.6e-07	34.8	0.5	1.6	1	IPR000210(26...132)	unreviewed	Zinc finger and BTB domain-containing protein 14	449	PF00651	26..129
	Bombycilla garrulus	Chordata	Craniata	Aves	Passeriformes	125297	A0A7L1MRV4	5.2e-08	36.4	0.5	1.6e-07	34.8	0.5	1.9	1	IPR000210(25...131)	unreviewed	ZBT14 protein	447	PF00651	25..128
	Bos indicus	Chordata	Craniata	Mammalia	Artiodactyla	30522	A0A4W2C1F1	7.9e-08	35.8	0.2	1.6e-07	34.8	0.2	1.5	1	IPR000210(10...111)	unreviewed	BTB domain-containing protein	551	PF00651	10..110
	Bos indicus	Chordata	Craniata	Mammalia	Artiodactyla	30522	A0A4W2DVJ3	6.8e-08	36	0.5	1.6e-07	34.8	0.5	1.6	1	IPR000210(26...132)	unreviewed	Zinc finger and BTB domain containing 14	449	PF00651	26..129
	Bos indicus	Chordata	Craniata	Mammalia	Artiodactyla	9915	A0A6P5DVS7	6.9e-08	36	0.5	1.6e-07	34.8	0.5	1.6	1	IPR000210(26...132)	unreviewed	Zinc finger and BTB domain-containing protein 14	449	PF00651	26..129
	Bos mutus	Chordata	Craniata	Mammalia	Artiodactyla	30521	A0A8B9YH83	6.7e-08	36	0.5	1.6e-07	34.9	0.5	1.6	1	IPR000210(20...126)	unreviewed	Zinc finger and BTB domain-containing protein 14	443	PF00651	20..123
	Bos mutus	Chordata	Craniata	Mammalia	Artiodactyla	72004	L8IP17	6.8e-08	36	0.5	1.6e-07	34.8	0.5	1.6	1	IPR000210(25...131)	unreviewed	Zinc finger protein 161-like protein	448	PF00651	25..128
	Bos taurus	Chordata	Craniata	Mammalia	Artiodactyla	9913	A0A3Q1MT09	7.9e-08	35.8	0.2	1.6e-07	34.8	0.2	1.5	1	IPR000210(10...111)	unreviewed	BTB domain-containing protein	551	PF00651	10..110
	Bos taurus	Chordata	Craniata	Mammalia	Artiodactyla	9913	F1MB88	6.8e-08	36	0.5	1.6e-07	34.8	0.5	1.6	1	IPR000210(26...132)	unreviewed	Zinc finger and BTB domain containing 14	449	PF00651	26..129
	Brachionus plicatilis	Rotifera		Eurotatoria	Ploima	10195	A0A3M7P2S7	5.3e-08	36.4	0.2	1.6e-07	34.8	0	1.9	1	IPR000210(22...128)	unreviewed	BTB domain-containing protein	334	PF00651	22..127
	Brachypodius atriceps	Chordata	Craniata	Aves	Passeriformes	182895	A0A7K7M8J2	5.2e-08	36.4	0.5	1.6e-07	34.8	0.5	1.9	1	IPR000210(25...131)	unreviewed	ZBT14 protein	447	PF00651	25..128
	Brachypteracias leptosomus	Chordata	Craniata	Aves	Coraciiformes	135165	A0A7L2V2J1	1.6e-07	34.8	0.5	1.6e-07	34.8	0.5	2.4	1	IPR000210(25...131)	unreviewed	ZBT14 protein	447	PF00651	25..128
	Branchiostoma floridae	Chordata	Cephalochordata	Leptocardii	Amphioxiformes	7739	C3Y2K4	8.2e-08	35.8	0	1.6e-07	34.8	0	1.6	1	IPR000210(17...123)	unreviewed	BTB domain-containing protein	519	PF00651	17..122
	Bubo bubo	Chordata	Craniata	Aves	Strigiformes	30461	A0A8C0ERF8	5.2e-08	36.4	0.5	1.6e-07	34.8	0.5	1.8	1	IPR000210(26...132)	unreviewed	Zinc finger and BTB domain-containing protein 14	448	PF00651	26..129
	Bucco capensis	Chordata	Craniata	Aves	Galbuliformes	135168	A0A7K9HEV9	5.1e-08	36.4	0.5	1.6e-07	34.8	0.5	1.9	1	IPR000210(25...131)	unreviewed	ZBT14 protein	447	PF00651	25..128
	Bucorvus abyssinicus	Chordata	Craniata	Aves	Bucerotiformes	153643	A0A7K4YLJ6	5.2e-08	36.4	0.5	1.6e-07	34.8	0.5	1.8	1	IPR000210(25...131)	unreviewed	ZBT14 protein	447	PF00651	25..128
	Buphagus erythrorhynchus	Chordata	Craniata	Aves	Passeriformes	245048	A0A7L3H0C8	5.2e-08	36.4	0.5	1.6e-07	34.8	0.5	1.9	1	IPR000210(25...131)	unreviewed	ZBT14 protein	447	PF00651	25..128
	Burhinus bistriatus	Chordata	Craniata	Aves	Charadriiformes	240201	A0A7K4SKF3	5.2e-08	36.4	0.5	1.6e-07	34.8	0.5	1.9	1	IPR000210(25...131)	unreviewed	ZBT14 protein	447	PF00651	25..128
	Buteo japonicus	Chordata	Craniata	Aves	Accipitriformes	224669	A0A8C0BAF3	5.2e-08	36.4	0.5	1.6e-07	34.8	0.5	1.8	1	IPR000210(25...131)	unreviewed	ZBT14 protein	447	PF00651	25..128
	Cairina moschata	Chordata	Craniata	Aves	Anseriformes	1240228	A0A8C3C838	5.4e-08	36.3	0.5	1.6e-07	34.8	0.5	1.8	1	IPR000210(26...132)	unreviewed	Zinc finger and BTB domain-containing protein 14	448	PF00651	26..129
	Calcarius ornatus	Chordata	Craniata	Aves	Passeriformes	198940	A0A852A843	5.2e-08	36.4	0.5	1.6e-07	34.8	0.5	1.9	1	IPR000210(25...131)	unreviewed	ZBT14 protein	447	PF00651	25..128
	Calidris pygmaea	Chordata	Craniata	Aves	Charadriiformes	425635	A0A8C3PU16	5.2e-08	36.4	0.5	1.6e-07	34.8	0.5	1.8	1	IPR000210(26...132)	unreviewed	Zinc finger and BTB domain-containing protein 14	448	PF00651	26..129
	Callaeas wilsoni	Chordata	Craniata	Aves	Passeriformes	1347786	A0A7L4KPV8	5.2e-08	36.4	0.5	1.6e-07	34.8	0.5	1.9	1	IPR000210(25...131)	unreviewed	ZBT14 protein	447	PF00651	25..128
	Callipepla squamata	Chordata	Craniata	Aves	Galliformes	9009	A0A226NFQ4	5.2e-08	36.4	0.5	1.6e-07	34.9	0.5	1.8	1	IPR000210(20...126)	unreviewed	Zinc finger and BTB domain-containing protein 14	442	PF00651	20..123
	Callithrix jacchus	Chordata	Craniata	Mammalia	Primates	9483	F7HM25	6.8e-08	36	0.5	1.6e-07	34.8	0.5	1.6	1	IPR000210(26...132)	unreviewed	Zinc finger and BTB domain containing 14	449	PF00651	26..129
	Callorhinus ursinus	Chordata	Craniata	Mammalia	Carnivora	34884	A0A3Q7QJW3	6.8e-08	36	0.5	1.6e-07	34.8	0.5	1.6	1	IPR000210(26...132)	unreviewed	Zinc finger and BTB domain-containing protein 14	449	PF00651	26..129
	Caloenas nicobarica	Chordata	Craniata	Aves	Columbiformes	187106	A0A7K6T1V8	5.1e-08	36.4	0.5	1.6e-07	34.8	0.5	1.9	1	IPR000210(25...131)	unreviewed	ZBT14 protein	447	PF00651	25..128
	Calonectris borealis	Chordata	Craniata	Aves	Procellariiformes	1323832	A0A7L3XDG7	5.2e-08	36.4	0.5	1.6e-07	34.8	0.5	1.8	1	IPR000210(25...131)	unreviewed	ZBT14 protein	447	PF00651	25..128
	Calypte anna	Chordata	Craniata	Aves	Apodiformes	9244	A0A091HNI6	5.2e-08	36.4	0.5	1.6e-07	34.8	0.5	1.8	1	IPR000210(26...132)	unreviewed	Zinc finger and BTB domain-containing protein 14	448	PF00651	26..129
	Calyptomena viridis	Chordata	Craniata	Aves	Passeriformes	135972	A0A851BX69	5.2e-08	36.4	0.5	1.6e-07	34.8	0.5	1.8	1	IPR000210(25...131)	unreviewed	ZBT14 protein	447	PF00651	25..128
	Camelus bactrianus	Chordata	Craniata	Mammalia	Artiodactyla	9837	A0A9W3F820	7.9e-08	35.8	0.2	1.6e-07	34.8	0.2	1.5	1	IPR000210(8...115)	unreviewed	BTB domain-containing protein	551	PF00651	8..114
	Camelus bactrianus	Chordata	Craniata	Mammalia	Artiodactyla	9837	A0A9W3G9K8	6.9e-08	36	0.5	1.6e-07	34.8	0.5	1.6	1	IPR000210(26...132)	unreviewed	Zinc finger and BTB domain-containing protein 14	449	PF00651	26..129
	Camelus dromedarius	Chordata	Craniata	Mammalia	Artiodactyla	9838	A0A5N4CH86	7e-08	36	0.5	1.6e-07	34.8	0.5	1.6	1	IPR000210(35...141)	unreviewed	Zinc finger and BTB domain-containing protein 14	458	PF00651	35..138
	Camelus ferus	Chordata	Craniata	Mammalia	Artiodactyla	419612	A0A8B8S1A4	6.9e-08	36	0.5	1.6e-07	34.8	0.5	1.6	1	IPR000210(26...132)	unreviewed	Zinc finger and BTB domain-containing protein 14	449	PF00651	26..129
	Camelus ferus	Chordata	Craniata	Mammalia	Artiodactyla	419612	S9WT35	6.8e-08	36	0.5	1.6e-07	34.9	0.5	1.6	1	IPR000210(20...126)	unreviewed	Zinc finger and BTB domain-containing protein 14	443	PF00651	20..123
	Campylorhamphus procurvoides	Chordata	Craniata	Aves	Passeriformes	190295	A0A851MD91	5.2e-08	36.4	0.5	1.6e-07	34.8	0.5	1.8	1	IPR000210(25...131)	unreviewed	ZBT14 protein	447	PF00651	25..128
	Canis lupus	Chordata	Craniata	Mammalia	Carnivora	286419	A0A8C0LCI7	6.8e-08	36	0.5	1.6e-07	34.8	0.5	1.6	1	IPR000210(26...132)	unreviewed	Zinc finger and BTB domain containing 14	449	PF00651	26..129
	Canis lupus	Chordata	Craniata	Mammalia	Carnivora	9615	A0A8C0MNR0	6.8e-08	36	0.5	1.6e-07	34.8	0.5	1.6	1	IPR000210(26...132)	unreviewed	Zinc finger and BTB domain containing 14	449	PF00651	26..129
	Canis lupus	Chordata	Craniata	Mammalia	Carnivora	9615	A0A8I3MSP2	6.8e-08	36	0.5	1.6e-07	34.8	0.5	1.6	1	IPR000210(26...132)	unreviewed	Zinc finger and BTB domain containing 14	449	PF00651	26..129
	Capra hircus	Chordata	Craniata	Mammalia	Artiodactyla	9925	A0A452DQL6	6.8e-08	36	0.5	1.6e-07	34.8	0.5	1.6	1	IPR000210(25...131)	unreviewed	Zinc finger and BTB domain containing 14	448	PF00651	25..128
	Capra hircus	Chordata	Craniata	Mammalia	Artiodactyla	9925	A0A8C2XX91	5.5e-08	36.3	0.2	1.6e-07	34.8	0.2	1.8	1	IPR000210(40...147)	unreviewed	BTB domain-containing protein	547	PF00651	40..146
	Capra hircus	Chordata	Craniata	Mammalia	Artiodactyla	9925	A0A8C2Y1J3	6.8e-08	36	0.5	1.6e-07	34.8	0.5	1.6	1	IPR000210(26...132)	unreviewed	Zinc finger and BTB domain-containing protein 14	449	PF00651	26..129
	Cardinalis cardinalis	Chordata	Craniata	Aves	Passeriformes	98964	A0A7K5M2U4	5.2e-08	36.4	0.5	1.6e-07	34.8	0.5	1.8	1	IPR000210(25...131)	unreviewed	ZBT14 protein	447	PF00651	25..128
	Carlito syrichta	Chordata	Craniata	Mammalia	Primates	1868482	A0A1U7T0F4	6.9e-08	36	0.5	1.6e-07	34.8	0.5	1.6	1	IPR000210(26...132)	unreviewed	Zinc finger and BTB domain-containing protein 14	449	PF00651	26..129
	Carlito syrichta	Chordata	Craniata	Mammalia	Primates	1868482	A0A3Q0E1G3	1e-07	35.4	1.3	1.6e-07	34.8	0.1	2	1	IPR000210(31...137)	unreviewed	BTB domain-containing protein	450	PF00651	31..136
	Castor canadensis	Chordata	Craniata	Mammalia	Rodentia	51338	A0A250YIE7	6.9e-08	36	0.5	1.6e-07	34.8	0.5	1.6	1	IPR000210(26...132)	unreviewed	Zinc finger and BTB domain-containing protein 14	449	PF00651	26..129
	Casuarius casuarius	Chordata	Craniata	Aves	Casuariiformes	8787	A0A7K8N383	5.2e-08	36.4	0.5	1.6e-07	34.8	0.5	1.8	1	IPR000210(25...131)	unreviewed	ZBT14 protein	447	PF00651	25..128
	Catagonus wagneri	Chordata	Craniata	Mammalia	Artiodactyla	51154	A0A8C3WIL9	6.8e-08	36	0.5	1.6e-07	34.8	0.5	1.6	1	IPR000210(26...132)	unreviewed	Zinc finger and BTB domain-containing protein 14	449	PF00651	26..129
	Catagonus wagneri	Chordata	Craniata	Mammalia	Artiodactyla	51154	A0A8C3X537	7.9e-08	35.8	0.2	1.6e-07	34.8	0.2	1.5	1	IPR000210(10...111)	unreviewed	BTB domain-containing protein	551	PF00651	10..110
	Cathartes aura	Chordata	Craniata	Aves	Accipitriformes	43455	A0A091LAH6	5.2e-08	36.4	0.5	1.6e-07	34.8	0.5	1.8	1	IPR000210(26...132)	unreviewed	Zinc finger and BTB domain-containing protein 14	448	PF00651	26..129
	Catharus fuscescens	Chordata	Craniata	Aves	Passeriformes	159581	A0A7L2D1T9	5.1e-08	36.4	0.5	1.6e-07	34.8	0.5	1.9	1	IPR000210(25...131)	unreviewed	ZBT14 protein	447	PF00651	25..128
	Catharus ustulatus	Chordata	Craniata	Aves	Passeriformes	91951	A0A8C3TY73	5.2e-08	36.4	0.5	1.6e-07	34.8	0.5	1.9	1	IPR000210(26...132)	unreviewed	Zinc finger and BTB domain-containing protein 14	448	PF00651	26..129
	Cebus imitator	Chordata	Craniata	Mammalia	Primates	2715852	A0A2K5S5G6	6.8e-08	36	0.5	1.6e-07	34.8	0.5	1.6	1	IPR000210(26...132)	unreviewed	Zinc finger and BTB domain containing 14	449	PF00651	26..129
	Centropus bengalensis	Chordata	Craniata	Aves	Cuculiformes	1463675	A0A852LF25	5.2e-08	36.4	0.5	1.6e-07	34.8	0.5	1.8	1	IPR000210(25...131)	unreviewed	ZBT14 protein	447	PF00651	25..128
	Centropus unirufus	Chordata	Craniata	Aves	Cuculiformes	1118519	A0A7K4ZEN9	5.2e-08	36.4	0.5	1.6e-07	34.8	0.5	1.9	1	IPR000210(25...131)	unreviewed	ZBT14 protein	447	PF00651	25..128
	Cephalopterus ornatus	Chordata	Craniata	Aves	Passeriformes	114276	A0A7K5UHY9	5.2e-08	36.4	0.5	1.6e-07	34.8	0.5	1.8	1	IPR000210(25...131)	unreviewed	ZBT14 protein	447	PF00651	25..128
	Cepphus grylle	Chordata	Craniata	Aves	Charadriiformes	28697	A0A7L3R5C9	5.2e-08	36.4	0.5	1.6e-07	34.8	0.5	1.8	1	IPR000210(25...131)	unreviewed	ZBT14 protein	447	PF00651	25..128
	Cercocebus atys	Chordata	Craniata	Mammalia	Primates	9531	A0A2K5MXB3	6.8e-08	36	0.5	1.6e-07	34.8	0.5	1.6	1	IPR000210(26...132)	unreviewed	Zinc finger and BTB domain containing 14	449	PF00651	26..129
	Cercocebus atys	Chordata	Craniata	Mammalia	Primates	9531	A0A2K5NSM2	7.4e-08	35.9	0.2	1.6e-07	34.8	0.2	1.5	1	IPR000210(46...153)	unreviewed	BTB domain-containing protein	545	PF00651	46..152
	Certhia brachydactyla	Chordata	Craniata	Aves	Passeriformes	73330	A0A7L1W9F5	5.2e-08	36.4	0.5	1.6e-07	34.8	0.5	1.9	1	IPR000210(25...131)	unreviewed	ZBT14 protein	447	PF00651	25..128
	Certhia familiaris	Chordata	Craniata	Aves	Passeriformes	73333	A0A851S1X0	5.2e-08	36.4	0.5	1.6e-07	34.8	0.5	1.9	1	IPR000210(25...131)	unreviewed	ZBT14 protein	447	PF00651	25..128
	Cettia cetti	Chordata	Craniata	Aves	Passeriformes	68486	A0A7L3QE98	5.2e-08	36.4	0.5	1.6e-07	34.8	0.5	1.9	1	IPR000210(25...131)	unreviewed	ZBT14 protein	447	PF00651	25..128
	Ceuthmochares aereus	Chordata	Craniata	Aves	Cuculiformes	1961834	A0A7L4JIH6	5.2e-08	36.4	0.5	1.6e-07	34.8	0.5	1.8	1	IPR000210(25...131)	unreviewed	ZBT14 protein	447	PF00651	25..128
	Ceyx cyanopectus	Chordata	Craniata	Aves	Coraciiformes	390723	A0A7L4NN17	5.2e-08	36.4	0.5	1.6e-07	34.8	0.5	1.9	1	IPR000210(25...131)	unreviewed	ZBT14 protein	447	PF00651	25..128
	Chaetops frenatus	Chordata	Craniata	Aves	Passeriformes	221966	A0A7L3EDE2	5.2e-08	36.4	0.5	1.6e-07	34.8	0.5	1.9	1	IPR000210(25...131)	unreviewed	ZBT14 protein	447	PF00651	25..128
	Chaetorhynchus papuensis	Chordata	Craniata	Aves	Passeriformes	254446	A0A7K8ICE6	5.2e-08	36.4	0.5	1.6e-07	34.8	0.5	1.9	1	IPR000210(25...131)	unreviewed	ZBT14 protein	447	PF00651	25..128
	Channa argus	Chordata	Craniata	Actinopteri	Anabantiformes	215402	A0A6G1QNL9	6.5e-08	36.1	0.6	1.6e-07	34.8	0.6	1.7	1	IPR000210(64...170)	unreviewed	Zinc finger and BTB domain-containing protein 14 Zinc finger protein 161-like protein	477	PF00651	64..167
	Charadrius vociferus	Chordata	Craniata	Aves	Charadriiformes	50402	A0A0A0A6R4	5.2e-08	36.4	0.5	1.6e-07	34.8	0.5	1.8	1	IPR000210(26...132)	unreviewed	Zinc finger and BTB domain-containing protein 14	448	PF00651	26..129
	Chauna torquata	Chordata	Craniata	Aves	Anseriformes	30388	A0A7L0JRD5	5.2e-08	36.4	0.5	1.6e-07	34.8	0.5	1.8	1	IPR000210(25...131)	unreviewed	ZBT14 protein	447	PF00651	25..128
	Chelydra serpentina	Chordata	Craniata		Testudines	8475	A0A8C3TLZ5	5.2e-08	36.4	0.5	1.6e-07	34.8	0.5	1.8	1	IPR000210(25...131)	unreviewed	ZBT14 protein	447	PF00651	25..128
	Chelydra serpentina	Chordata	Craniata		Testudines	8475	A0A8T1STF6	5.3e-08	36.4	0.5	1.6e-07	34.8	0.5	1.8	1	IPR000210(26...132)	unreviewed	Zinc finger and BTB domain-containing protein 14	448	PF00651	26..129
	Chiloscyllium punctatum	Chordata	Craniata	Chondrichthyes	Orectolobiformes	137246	A0A401S292	6.8e-08	36	0.5	1.6e-07	34.8	0.5	1.6	1	IPR000210(33...139)	unreviewed	Zinc finger and BTB domain-containing protein 14	454	PF00651	33..135
	Chinchilla lanigera	Chordata	Craniata	Mammalia	Rodentia	34839	A0A8C2W1P2	6.9e-08	36	0.5	1.6e-07	34.8	0.5	1.6	1	IPR000210(25...131)	unreviewed	Zinc finger and BTB domain-containing protein 14	448	PF00651	25..128
	Chinchilla lanigera	Chordata	Craniata	Mammalia	Rodentia	34839	A0A8C2W795	6.9e-08	36	0.5	1.6e-07	34.8	0.5	1.6	1	IPR000210(26...132)	unreviewed	Zinc finger and BTB domain-containing protein 14	449	PF00651	26..129
	Chionis minor	Chordata	Craniata	Aves	Charadriiformes	227182	A0A7K7F1V8	5.2e-08	36.4	0.5	1.6e-07	34.8	0.5	1.8	1	IPR000210(25...131)	unreviewed	ZBT14 protein	447	PF00651	25..128
	Chlorocebus sabaeus	Chordata	Craniata	Mammalia	Primates	60711	A0A0D9RYC5	6.8e-08	36	0.5	1.6e-07	34.8	0.5	1.6	1	IPR000210(26...132)	unreviewed	Zinc finger and BTB domain containing 14	449	PF00651	26..129
	Chloroceryle aenea	Chordata	Craniata	Aves	Coraciiformes	176938	A0A7K9TL78	5.2e-08	36.4	0.5	1.6e-07	34.8	0.5	1.9	1	IPR000210(25...131)	unreviewed	ZBT14 protein	447	PF00651	25..128
	Chloropsis cyanopogon	Chordata	Craniata	Aves	Passeriformes	1218682	A0A852B7A1	5.2e-08	36.4	0.5	1.6e-07	34.8	0.5	1.9	1	IPR000210(25...131)	unreviewed	ZBT14 protein	447	PF00651	25..128
	Chloropsis hardwickii	Chordata	Craniata	Aves	Passeriformes	667144	A0A850ULF9	5.2e-08	36.4	0.5	1.6e-07	34.8	0.5	1.9	1	IPR000210(25...131)	unreviewed	ZBT14 protein	447	PF00651	25..128
	Chordeiles acutipennis	Chordata	Craniata	Aves	Caprimulgiformes	118183	A0A7L0TXX3	5.2e-08	36.4	0.5	1.6e-07	34.8	0.5	1.8	1	IPR000210(25...131)	unreviewed	ZBT14 protein	447	PF00651	25..128
	Chroicocephalus maculipennis	Chordata	Craniata	Aves	Charadriiformes	287016	A0A7K5NLD3	5.2e-08	36.4	0.5	1.6e-07	34.8	0.5	1.8	1	IPR000210(25...131)	unreviewed	ZBT14 protein	447	PF00651	25..128
	Chrysemys picta	Chordata	Craniata		Testudines	8478	A0A8C3FH54	5.3e-08	36.4	0.5	1.6e-07	34.8	0.5	1.8	1	IPR000210(26...132)	unreviewed	Zinc finger and BTB domain-containing protein 14	448	PF00651	26..129
	Chrysochloris asiatica	Chordata	Craniata	Mammalia		185453	A0A9B0WU40	6.9e-08	36	0.5	1.6e-07	34.8	0.5	1.6	1	IPR000210(26...132)	unreviewed	Zinc finger and BTB domain-containing protein 14	449	PF00651	26..129
	Chrysolophus pictus	Chordata	Craniata	Aves	Galliformes	9089	A0A8C3LS24	5.2e-08	36.4	0.5	1.6e-07	34.8	0.5	1.8	1	IPR000210(26...132)	unreviewed	Zinc finger and BTB domain-containing protein 14	448	PF00651	26..129
	Chunga burmeisteri	Chordata	Craniata	Aves	Cariamiformes	1352770	A0A7K5GCM1	5.2e-08	36.4	0.5	1.6e-07	34.8	0.5	1.8	1	IPR000210(25...131)	unreviewed	ZBT14 protein	447	PF00651	25..128
	Ciccaba nigrolineata	Chordata	Craniata	Aves	Strigiformes	1118524	A0A7K8UZI1	5.2e-08	36.4	0.5	1.6e-07	34.8	0.5	1.8	1	IPR000210(25...131)	unreviewed	ZBT14 protein	447	PF00651	25..128
	Ciconia maguari	Chordata	Craniata	Aves	Ciconiiformes	52777	A0A7L0AT71	5.2e-08	36.4	0.5	1.6e-07	34.8	0.5	1.8	1	IPR000210(25...131)	unreviewed	ZBT14 protein	447	PF00651	25..128
	Cinclus mexicanus	Chordata	Craniata	Aves	Passeriformes	161649	A0A7L2JYA4	5.2e-08	36.4	0.5	1.6e-07	34.8	0.5	1.9	1	IPR000210(25...131)	unreviewed	ZBT14 protein	447	PF00651	25..128
	Circaetus pectoralis	Chordata	Craniata	Aves	Accipitriformes	321084	A0A7L4A6G2	5.2e-08	36.4	0.5	1.6e-07	34.8	0.5	1.8	1	IPR000210(25...131)	unreviewed	ZBT14 protein	447	PF00651	25..128
	Cisticola juncidis	Chordata	Craniata	Aves	Passeriformes	52622	A0A7L1QTQ5	5.2e-08	36.4	0.5	1.6e-07	34.8	0.5	1.9	1	IPR000210(25...131)	unreviewed	ZBT14 protein	447	PF00651	25..128
	Climacteris rufus	Chordata	Craniata	Aves	Passeriformes	47695	A0A7K6QFR2	5.2e-08	36.4	0.5	1.6e-07	34.8	0.5	1.8	1	IPR000210(25...131)	unreviewed	ZBT14 protein	447	PF00651	25..128
	Cnemophilus loriae	Chordata	Craniata	Aves	Passeriformes	254448	A0A7K8B408	5.2e-08	36.4	0.5	1.6e-07	34.8	0.5	1.9	1	IPR000210(25...131)	unreviewed	ZBT14 protein	447	PF00651	25..128
	Cochlearius cochlearius	Chordata	Craniata	Aves	Pelecaniformes	110676	A0A7K8P1I1	5.3e-08	36.4	0.5	1.6e-07	34.8	0.5	1.8	1	IPR000210(25...131)	unreviewed	ZBT14 protein	447	PF00651	25..128
	Colobus angolensis	Chordata	Craniata	Mammalia	Primates	336983	A0A2K5HU77	6.8e-08	36	0.5	1.6e-07	34.8	0.5	1.6	1	IPR000210(26...132)	unreviewed	Zinc finger and BTB domain containing 14	449	PF00651	26..129
	Columba livia	Chordata	Craniata	Aves	Columbiformes	8932	A0A2I0MWK3	5.1e-08	36.4	0.5	1.6e-07	34.8	0.5	1.9	1	IPR000210(26...132)	unreviewed	Zinc finger and BTB domain containing 14	448	PF00651	26..129
	Columba livia	Chordata	Craniata	Aves	Columbiformes	8932	R7VXY3	5.1e-08	36.4	0.5	1.6e-07	34.8	0.5	1.9	1	IPR000210(26...132)	unreviewed	Zinc finger protein 161 like protein	448	PF00651	26..129
	Columbina picui	Chordata	Craniata	Aves	Columbiformes	115618	A0A7K4RIU6	5.1e-08	36.4	0.5	1.6e-07	34.8	0.5	1.9	1	IPR000210(25...131)	unreviewed	ZBT14 protein	447	PF00651	25..128
	Copsychus sechellarum	Chordata	Craniata	Aves	Passeriformes	797021	A0A851UZI7	5.2e-08	36.4	0.5	1.6e-07	34.8	0.5	1.9	1	IPR000210(25...131)	unreviewed	ZBT14 protein	447	PF00651	25..128
	Corvus moneduloides	Chordata	Craniata	Aves	Passeriformes	1196302	A0A851WE30	5.2e-08	36.4	0.5	1.6e-07	34.8	0.5	1.9	1	IPR000210(25...131)	unreviewed	ZBT14 protein	447	PF00651	25..128
	Corvus moneduloides	Chordata	Craniata	Aves	Passeriformes	1196302	A0A8U7M7Z6	5.1e-08	36.4	0.5	1.6e-07	34.9	0.5	1.9	1	IPR000210(20...126)	unreviewed	Uncharacterized protein	442	PF00651	20..123
	Corythaeola cristata	Chordata	Craniata	Aves	Musophagiformes	103954	A0A851LLJ2	5.2e-08	36.4	0.5	1.6e-07	34.8	0.5	1.8	1	IPR000210(25...131)	unreviewed	ZBT14 protein	447	PF00651	25..128
	Corythaixoides concolor	Chordata	Craniata	Aves	Musophagiformes	103956	A0A7L0FEQ1	5.2e-08	36.4	0.5	1.6e-07	34.8	0.5	1.8	1	IPR000210(25...131)	unreviewed	ZBT14 protein	447	PF00651	25..128
	Coturnix japonica	Chordata	Craniata	Aves	Galliformes	93934	A0A8C2Y999	5.2e-08	36.4	0.5	1.6e-07	34.8	0.5	1.8	1	IPR000210(26...132)	unreviewed	Zinc finger and BTB domain-containing protein 14	448	PF00651	26..129
	Cricetulus griseus	Chordata	Craniata	Mammalia	Rodentia	10029	G3HT51	6.9e-08	36	0.5	1.6e-07	34.8	0.5	1.6	1	IPR000210(26...132)	unreviewed	Zinc finger and BTB domain containing 14	449	PF00651	26..129
	Crocodylus porosus	Chordata	Craniata		Crocodylia	8502	A0A7M4EXY6	5.2e-08	36.4	0.5	1.6e-07	34.8	0.5	1.9	1	IPR000210(26...132)	unreviewed	Zinc finger and BTB domain containing 14	448	PF00651	26..129
	Crotalus adamanteus	Chordata	Craniata	Lepidosauria	Squamata	8729	A0A0F7Z7J2	5.3e-08	36.4	0.5	1.6e-07	34.8	0.5	1.8	1	IPR000210(26...132)	unreviewed	Zinc finger and BTB domain-containing protein 14	448	PF00651	26..129
	Crotophaga sulcirostris	Chordata	Craniata	Aves	Cuculiformes	33598	A0A7K5HTT9	5.2e-08	36.4	0.5	1.6e-07	34.8	0.5	1.8	1	IPR000210(25...131)	unreviewed	ZBT14 protein	447	PF00651	25..128
	Crypturellus soui	Chordata	Craniata	Aves	Tinamiformes	458187	A0A7K4K5G0	5.5e-08	36.3	0.5	1.6e-07	34.8	0.5	1.8	1	IPR000210(25...131)	unreviewed	ZBT14 protein	447	PF00651	25..128
	Crypturellus undulatus	Chordata	Craniata	Aves	Tinamiformes	48396	A0A7K4LDR4	5.5e-08	36.3	0.5	1.6e-07	34.8	0.5	1.8	1	IPR000210(25...131)	unreviewed	ZBT14 protein	447	PF00651	25..128
	Cuculus canorus	Chordata	Craniata	Aves	Cuculiformes	55661	A0A091GHE9	5.2e-08	36.4	0.5	1.6e-07	34.8	0.5	1.8	1	IPR000210(26...132)	unreviewed	Zinc finger and BTB domain-containing protein 14	448	PF00651	26..129
	Cyanistes caeruleus	Chordata	Craniata	Aves	Passeriformes	156563	A0A8C0UZY4	5.2e-08	36.4	0.5	1.6e-07	34.8	0.5	1.9	1	IPR000210(26...132)	unreviewed	Zinc finger and BTB domain-containing protein 14	448	PF00651	26..129
	Cyanoderma ruficeps	Chordata	Craniata	Aves	Passeriformes	181631	A0A8C3R872	5.2e-08	36.4	0.5	1.6e-07	34.8	0.5	1.8	1	IPR000210(25...131)	unreviewed	Zinc finger and BTB domain-containing protein 14	447	PF00651	25..128
	Daphoenositta chrysoptera	Chordata	Craniata	Aves	Passeriformes	254528	A0A7K6FFR0	5.2e-08	36.4	0.5	1.6e-07	34.8	0.5	1.9	1	IPR000210(25...131)	unreviewed	ZBT14 protein	447	PF00651	25..128
	Dasyornis broadbenti	Chordata	Craniata	Aves	Passeriformes	243059	A0A7K6HDM7	5.2e-08	36.4	0.5	1.6e-07	34.8	0.5	1.8	1	IPR000210(25...131)	unreviewed	ZBT14 protein	447	PF00651	25..128
	Delphinapterus leucas	Chordata	Craniata	Mammalia	Artiodactyla	9749	A0A2Y9LE86	6.8e-08	36	0.5	1.6e-07	34.8	0.5	1.6	1	IPR000210(26...132)	unreviewed	Zinc finger and BTB domain-containing protein 14	449	PF00651	26..129
	Delphinapterus leucas	Chordata	Craniata	Mammalia	Artiodactyla	9749	A0A2Y9ME56	8e-08	35.8	0.2	1.6e-07	34.8	0.2	1.5	1	IPR000210(8...115)	unreviewed	BTB domain-containing protein	555	PF00651	8..114
	Dicaeum eximium	Chordata	Craniata	Aves	Passeriformes	667154	A0A7K9K7T3	5.2e-08	36.4	0.5	1.6e-07	34.8	0.5	1.8	1	IPR000210(25...131)	unreviewed	ZBT14 protein	447	PF00651	25..128
	Dicrurus megarhynchus	Chordata	Craniata	Aves	Passeriformes	450177	A0A7L0A9Z8	5.2e-08	36.4	0.5	1.6e-07	34.8	0.5	1.9	1	IPR000210(25...131)	unreviewed	ZBT14 protein	447	PF00651	25..128
	Dipodomys ordii	Chordata	Craniata	Mammalia	Rodentia	10020	A0A1S3FYW0	7.3e-08	35.9	0.2	1.6e-07	34.8	0.2	1.5	1	IPR000210(8...115)	unreviewed	BTB domain-containing protein	555	PF00651	8..114
	Dipodomys ordii	Chordata	Craniata	Mammalia	Rodentia	10020	A0A1S3G1G8	6.8e-08	36	0.5	1.6e-07	34.8	0.5	1.6	1	IPR000210(26...132)	unreviewed	Zinc finger and BTB domain-containing protein 14	449	PF00651	26..129
	Donacobius atricapilla	Chordata	Craniata	Aves	Passeriformes	237420	A0A851J8D2	5.2e-08	36.4	0.5	1.6e-07	34.8	0.5	1.9	1	IPR000210(25...131)	unreviewed	ZBT14 protein	447	PF00651	25..128
	Dromaius novaehollandiae	Chordata	Craniata	Aves	Casuariiformes	8790	A0A7K9AVB7	5.2e-08	36.4	0.5	1.6e-07	34.8	0.5	1.8	1	IPR000210(25...131)	unreviewed	ZBT14 protein	447	PF00651	25..128
	Dromaius novaehollandiae	Chordata	Craniata	Aves	Casuariiformes	8790	A0A8C4JEH1	5.3e-08	36.4	0.5	1.6e-07	34.8	0.5	1.8	1	IPR000210(26...132)	unreviewed	ZBT14 protein	448	PF00651	26..129
	Dromas ardeola	Chordata	Craniata	Aves	Charadriiformes	458190	A0A7K5X6B9	5.2e-08	36.4	0.5	1.6e-07	34.8	0.5	1.8	1	IPR000210(25...131)	unreviewed	ZBT14 protein	447	PF00651	25..128
	Drymodes brunneopygia	Chordata	Craniata	Aves	Passeriformes	626378	A0A7L3K5K1	5.2e-08	36.4	0.5	1.6e-07	34.8	0.5	1.9	1	IPR000210(25...131)	unreviewed	ZBT14 protein	447	PF00651	25..128
	Dryobates pubescens	Chordata	Craniata	Aves	Piciformes	118200	A0A093I8N7	5.1e-08	36.4	0.5	1.6e-07	34.8	0.5	1.9	1	IPR000210(26...132)	unreviewed	Zinc finger and BTB domain-containing protein 14	448	PF00651	26..129
	Dryoscopus gambensis	Chordata	Craniata	Aves	Passeriformes	85069	A0A851E7L5	5.2e-08	36.4	0.5	1.6e-07	34.8	0.5	1.9	1	IPR000210(25...131)	unreviewed	ZBT14 protein	447	PF00651	25..128
	Edolisoma coerulescens	Chordata	Craniata	Aves	Passeriformes	2585810	A0A7K9NZN6	5.2e-08	36.4	0.5	1.6e-07	34.8	0.5	1.9	1	IPR000210(25...131)	unreviewed	ZBT14 protein	447	PF00651	25..128
	Egretta garzetta	Chordata	Craniata	Aves	Pelecaniformes	188379	A0A091IQ87	5.2e-08	36.4	0.5	1.6e-07	34.8	0.5	1.9	1	IPR000210(26...132)	unreviewed	Zinc finger and BTB domain-containing protein 14	448	PF00651	26..129
	Elachura formosa	Chordata	Craniata	Aves	Passeriformes	1463973	A0A851TZ99	5.2e-08	36.4	0.5	1.6e-07	34.8	0.5	1.9	1	IPR000210(25...131)	unreviewed	ZBT14 protein	447	PF00651	25..128
	Eleutherodactylus coqui	Chordata	Craniata	Amphibia	Anura	57060	A0A8J6F1X0	6.6e-08	36	0.5	1.6e-07	34.8	0.5	1.7	1	IPR000210(26...132)	unreviewed	Zinc finger and BTB domain-containing protein 14	453	PF00651	26..128
	Emberiza fucata	Chordata	Craniata	Aves	Passeriformes	337179	A0A7K4UYP2	5.2e-08	36.4	0.5	1.6e-07	34.8	0.5	1.9	1	IPR000210(25...131)	unreviewed	ZBT14 protein	447	PF00651	25..128
	Enhydra lutris	Chordata	Craniata	Mammalia	Carnivora	391180	A0A2Y9ISW0	6.8e-08	36	0.5	1.6e-07	34.8	0.5	1.6	1	IPR000210(26...132)	unreviewed	Zinc finger and BTB domain-containing protein 14	449	PF00651	26..129
	Enhydra lutris	Chordata	Craniata	Mammalia	Carnivora	391180	A0A2Y9KA98	7.4e-08	35.9	0.2	1.6e-07	34.8	0.2	1.5	1	IPR000210(46...153)	unreviewed	BTB domain-containing protein	550	PF00651	46..152
	Eolophus roseicapilla	Chordata	Craniata	Aves	Psittaciformes	176039	A0A851XFU0	5.3e-08	36.4	0.5	1.6e-07	34.8	0.5	1.8	1	IPR000210(25...131)	unreviewed	ZBT14 protein	447	PF00651	25..128
	Eptesicus nilssonii	Chordata	Craniata	Mammalia	Chiroptera	59451	A0AA40HUB8	6.8e-08	36	0.5	1.6e-07	34.9	0.5	1.6	1	IPR000210(20...126)	unreviewed	Zinc finger and BTB domain-containing protein 14	443	PF00651	20..123
	Equus asinus	Chordata	Craniata	Mammalia	Perissodactyla	9793	A0A8C4L2N5	6.9e-08	36	0.5	1.6e-07	34.8	0.5	1.6	1	IPR000210(26...132)	unreviewed	Zinc finger and BTB domain containing 14	449	PF00651	26..129
	Equus asinus	Chordata	Craniata	Mammalia	Perissodactyla	9793	A0A8C4MXQ8	7.6e-08	35.8	0.2	1.6e-07	34.8	0.2	1.5	1	IPR000210(46...153)	unreviewed	BTB domain-containing protein	545	PF00651	46..152
	Equus asinus	Chordata	Craniata	Mammalia	Perissodactyla	83772	A0A8C4PHQ5	6.9e-08	36	0.5	1.6e-07	34.8	0.5	1.6	1	IPR000210(26...132)	unreviewed	Zinc finger and BTB domain containing 14	449	PF00651	26..129
	Equus asinus	Chordata	Craniata	Mammalia	Perissodactyla	9793	A0A9L0IZI6	6.8e-08	36	0.5	1.6e-07	34.9	0.5	1.6	1	IPR000210(20...126)	unreviewed	Zinc finger and BTB domain-containing protein 14	443	PF00651	20..123
	Equus caballus	Chordata	Craniata	Mammalia	Perissodactyla	9796	A0A3Q2HT34	7.6e-08	35.8	0.2	1.6e-07	34.8	0.2	1.5	1	IPR000210(46...153)	unreviewed	BTB domain-containing protein	545	PF00651	46..152
	Equus caballus	Chordata	Craniata	Mammalia	Perissodactyla	9796	A0A3Q2HUS0	8.1e-08	35.8	0.2	1.6e-07	34.8	0.2	1.5	1	IPR000210(10...111)	unreviewed	BTB domain-containing protein	558	PF00651	10..110
	Equus caballus	Chordata	Craniata	Mammalia	Perissodactyla	9796	A0A9L0SPN1	6.8e-08	36	0.5	1.6e-07	34.9	0.5	1.6	1	IPR000210(20...126)	unreviewed	Zinc finger and BTB domain containing 14	443	PF00651	20..123
	Equus caballus	Chordata	Craniata	Mammalia	Perissodactyla	9796	A0A9L0TKV5	6.9e-08	36	0.5	1.6e-07	34.8	0.5	1.6	1	IPR000210(25...131)	unreviewed	Zinc finger and BTB domain containing 14	448	PF00651	25..128
	Equus caballus	Chordata	Craniata	Mammalia	Perissodactyla	9796	A0A9L0TUE9	6.9e-08	36	0.5	1.6e-07	34.8	0.5	1.6	1	IPR000210(26...132)	unreviewed	Zinc finger and BTB domain containing 14	449	PF00651	26..129
	Equus caballus	Chordata	Craniata	Mammalia	Perissodactyla	9796	F7AUF5	6.1e-08	36.2	0.5	1.6e-07	34.8	0.5	1.7	1	IPR000210(36...142)	unreviewed	Zinc finger and BTB domain containing 14	459	PF00651	36..139
	Erinaceus europaeus	Chordata	Craniata	Mammalia	Eulipotyphla	9365	A0A1S2ZIL6	6.9e-08	36	0.5	1.6e-07	34.8	0.5	1.6	1	IPR000210(26...132)	unreviewed	Zinc finger and BTB domain-containing protein 14	448	PF00651	26..129
	Erinaceus europaeus	Chordata	Craniata	Mammalia	Eulipotyphla	9365	A0A1S2ZU46	7.4e-08	35.9	0.2	1.6e-07	34.8	0.2	1.5	1	IPR000210(46...153)	unreviewed	BTB domain-containing protein	550	PF00651	46..152
	Erithacus rubecula	Chordata	Craniata	Aves	Passeriformes	37610	A0A7K7G4U3	5.2e-08	36.4	0.5	1.6e-07	34.8	0.5	1.9	1	IPR000210(25...131)	unreviewed	ZBT14 protein	447	PF00651	25..128
	Erpornis zantholeuca	Chordata	Craniata	Aves	Passeriformes	1112836	A0A7L2XE48	5.2e-08	36.4	0.5	1.6e-07	34.8	0.5	1.9	1	IPR000210(25...131)	unreviewed	ZBT14 protein	447	PF00651	25..128
	Erythrocercus mccallii	Chordata	Craniata	Aves	Passeriformes	107208	A0A7K5Q0A3	5.2e-08	36.4	0.5	1.6e-07	34.8	0.5	1.9	1	IPR000210(25...131)	unreviewed	ZBT14 protein	447	PF00651	25..128
	Eschrichtius robustus	Chordata	Craniata	Mammalia	Artiodactyla	9764	A0A2F0B332	6.7e-08	36	0.5	1.6e-07	34.9	0.5	1.6	1	IPR000210(20...126)	unreviewed	Zinc finger and BTB domain-containing protein 14	443	PF00651	20..123
	Eublepharis macularius	Chordata	Craniata	Lepidosauria	Squamata	481883	A0AA97JQX2	5.4e-08	36.3	0.5	1.6e-07	34.8	0.5	1.8	1	IPR000210(26...132)	unreviewed	Zinc finger and BTB domain-containing protein 14	448	PF00651	26..129
	Eubucco bourcierii	Chordata	Craniata	Aves	Piciformes	91767	A0A7K8XN39	5.1e-08	36.4	0.5	1.6e-07	34.8	0.5	1.9	1	IPR000210(25...131)	unreviewed	ZBT14 protein	447	PF00651	25..128
	Eudromia elegans	Chordata	Craniata	Aves	Tinamiformes	8805	A0A7K7UYQ5	5.5e-08	36.3	0.5	1.6e-07	34.8	0.5	1.8	1	IPR000210(25...131)	unreviewed	ZBT14 protein	447	PF00651	25..128
	Eudyptes chrysocome	Chordata	Craniata	Aves	Sphenisciformes	79626	A0A8J4L694	5.2e-08	36.4	0.5	1.6e-07	34.8	0.5	1.8	1	IPR000210(25...131)	unreviewed	ZBT14 protein	447	PF00651	25..128
	Eudyptes filholi	Chordata	Craniata	Aves	Sphenisciformes	1419345	A0A8K0BHM1	5.2e-08	36.4	0.5	1.6e-07	34.8	0.5	1.8	1	IPR000210(25...131)	unreviewed	ZBT14 protein	447	PF00651	25..128
	Eudyptes sclateri	Chordata	Craniata	Aves	Sphenisciformes	92688	A0A8J4K0J3	5.2e-08	36.4	0.5	1.6e-07	34.8	0.5	1.8	1	IPR000210(25...131)	unreviewed	ZBT14 protein	447	PF00651	25..128
	Eudyptula minor	Chordata	Craniata	Aves	Sphenisciformes	37083	A0A8J4NGJ2	5.2e-08	36.4	0.5	1.6e-07	34.8	0.5	1.8	1	IPR000210(25...131)	unreviewed	ZBT14 protein	447	PF00651	25..128
	Eudyptula novaehollandiae	Chordata	Craniata	Aves	Sphenisciformes	2052820	A0A8S9EXV0	5.2e-08	36.4	0.5	1.6e-07	34.8	0.5	1.8	1	IPR000210(25...131)	unreviewed	ZBT14 protein	447	PF00651	25..128
	Eulacestoma nigropectus	Chordata	Craniata	Aves	Passeriformes	461239	A0A7K8DGY9	5.2e-08	36.4	0.5	1.6e-07	34.8	0.5	1.9	1	IPR000210(25...131)	unreviewed	ZBT14 protein	447	PF00651	25..128
	Eurystomus gularis	Chordata	Craniata	Aves	Coraciiformes	325343	A0A7L4CZC3	5.2e-08	36.4	0.5	1.6e-07	34.8	0.5	1.9	1	IPR000210(25...131)	unreviewed	ZBT14 protein	447	PF00651	25..128
	Falco tinnunculus	Chordata	Craniata	Aves	Falconiformes	100819	A0A8C4UDP7	5.2e-08	36.4	0.5	1.6e-07	34.8	0.5	1.8	1	IPR000210(26...132)	unreviewed	Zinc finger and BTB domain-containing protein 14	448	PF00651	26..129
	Falcunculus frontatus	Chordata	Craniata	Aves	Passeriformes	254539	A0A7K6L7X7	5.2e-08	36.4	0.5	1.6e-07	34.8	0.5	1.9	1	IPR000210(25...131)	unreviewed	ZBT14 protein	447	PF00651	25..128
	Felis catus	Chordata	Craniata	Mammalia	Carnivora	9685	A0A2I2U843	7.4e-08	35.9	0.2	1.6e-07	34.8	0.2	1.5	1	IPR000210(46...153)	unreviewed	BTB domain-containing protein	545	PF00651	46..152
	Felis catus	Chordata	Craniata	Mammalia	Carnivora	9685	A0A5F5XJP7	7.3e-08	35.9	0.2	1.6e-07	34.8	0.2	1.5	1	IPR000210(46...153)	unreviewed	BTB domain-containing protein	546	PF00651	46..152
	Felis catus	Chordata	Craniata	Mammalia	Carnivora	9685	A0A5F5XM27	7.8e-08	35.8	0.2	1.6e-07	34.8	0.2	1.5	1	IPR000210(46...153)	unreviewed	BTB domain-containing protein	543	PF00651	46..152
	Felis catus	Chordata	Craniata	Mammalia	Carnivora	9685	A0A5F5XM39	7.5e-08	35.9	0.2	1.6e-07	34.8	0.2	1.5	1	IPR000210(46...153)	unreviewed	BTB domain-containing protein	554	PF00651	46..152
	Felis catus	Chordata	Craniata	Mammalia	Carnivora	9685	A0A5F5XU03	7.5e-08	35.9	0.2	1.6e-07	34.8	0.2	1.5	1	IPR000210(46...153)	unreviewed	BTB domain-containing protein	559	PF00651	46..152
	Felis catus	Chordata	Craniata	Mammalia	Carnivora	9685	M3WRL4	7e-08	36	0.5	1.6e-07	34.8	0.5	1.6	1	IPR000210(26...132)	unreviewed	Zinc finger and BTB domain containing 14	449	PF00651	26..129
	Ficedula albicollis	Chordata	Craniata	Aves	Passeriformes	59894	A0A803WAQ7	5.2e-08	36.4	0.5	1.6e-07	34.8	0.5	1.9	1	IPR000210(26...132)	unreviewed	Zinc finger and BTB domain containing 14	448	PF00651	26..129
	Formicarius rufipectus	Chordata	Craniata	Aves	Passeriformes	1118560	A0A7L0NDH5	5.5e-08	36.3	0.5	1.6e-07	34.8	0.5	1.8	1	IPR000210(25...131)	unreviewed	ZBT14 protein	447	PF00651	25..128
	Fregata magnificens	Chordata	Craniata	Aves	Suliformes	37042	A0A850W6J4	5.3e-08	36.4	0.5	1.6e-07	34.8	0.5	1.8	1	IPR000210(25...131)	unreviewed	ZBT14 protein	447	PF00651	25..128
	Fregetta grallaria	Chordata	Craniata	Aves	Procellariiformes	79628	A0A7L3YW71	5.2e-08	36.4	0.5	1.6e-07	34.8	0.5	1.8	1	IPR000210(25...131)	unreviewed	ZBT14 protein	447	PF00651	25..128
	Fundulus heteroclitus	Chordata	Craniata	Actinopteri	Cyprinodontiformes	8078	A0A3Q2PB33	5.7e-08	36.2	0.6	1.6e-07	34.8	0.6	1.8	1	IPR000210(46...152)	unreviewed	Zinc finger and BTB domain-containing protein 14	461	PF00651	46..149
	Furnarius figulus	Chordata	Craniata	Aves	Passeriformes	463165	A0A7K5B6X2	5.2e-08	36.4	0.5	1.6e-07	34.8	0.5	1.8	1	IPR000210(25...131)	unreviewed	ZBT14 protein	447	PF00651	25..128
	Galbula dea	Chordata	Craniata	Aves	Galbuliformes	1109041	A0A7K9TH16	5.1e-08	36.4	0.5	1.6e-07	34.8	0.5	1.9	1	IPR000210(25...131)	unreviewed	ZBT14 protein	447	PF00651	25..128
	Galemys pyrenaicus	Chordata	Craniata	Mammalia	Eulipotyphla	202257	A0A8J6DUD7	6.7e-08	36	0.5	1.6e-07	34.9	0.5	1.6	1	IPR000210(20...126)	unreviewed	Zinc finger and BTB domain-containing protein 14	443	PF00651	20..123
	Gallus gallus	Chordata	Craniata	Aves	Galliformes	9031	A0A1D5NU06	5.5e-08	36.3	0.5	1.6e-07	34.8	0.5	1.8	1	IPR000210(26...132)	unreviewed	Zinc finger and BTB domain containing 14	448	PF00651	26..129
	Gallus gallus	Chordata	Craniata	Aves	Galliformes	9031	Q92010	5.5e-08	36.3	0.5	1.6e-07	34.8	0.5	1.8	1	IPR000210(26...132)	reviewed	Zinc finger and BTB domain-containing protein 14	448	PF00651	26..129
	Geococcyx californianus	Chordata	Craniata	Aves	Cuculiformes	8947	A0A7K4JC83	5.2e-08	36.4	0.5	1.6e-07	34.8	0.5	1.8	1	IPR000210(25...131)	unreviewed	ZBT14 protein	447	PF00651	25..128
	Geospiza fortis	Chordata	Craniata	Aves	Passeriformes	48883	A0A8N5EW06	5.2e-08	36.4	0.5	1.6e-07	34.8	0.5	1.9	1	IPR000210(26...132)	unreviewed	Zinc finger and BTB domain-containing protein 14	448	PF00651	26..129
	Geotrypetes seraphini	Chordata	Craniata	Amphibia	Gymnophiona	260995	A0A6P8PPP5	5.6e-08	36.3	0.5	1.6e-07	34.8	0.5	1.8	1	IPR000210(26...132)	unreviewed	Zinc finger and BTB domain-containing protein 14 isoform X2	453	PF00651	26..129
	Geotrypetes seraphini	Chordata	Craniata	Amphibia	Gymnophiona	260995	A0A6P8PUW8	5.5e-08	36.3	0.5	1.6e-07	34.8	0.5	1.8	1	IPR000210(20...126)	unreviewed	Zinc finger and BTB domain-containing protein 14 isoform X3	447	PF00651	20..123
	Glareola pratincola	Chordata	Craniata	Aves	Charadriiformes	43316	A0A7L4MB14	5.3e-08	36.4	0.5	1.6e-07	34.8	0.5	1.8	1	IPR000210(25...131)	unreviewed	ZBT14 protein	447	PF00651	25..128
	Glaucidium brasilianum	Chordata	Craniata	Aves	Strigiformes	78217	A0A7L0RF53	5.2e-08	36.4	0.5	1.6e-07	34.8	0.5	1.9	1	IPR000210(25...131)	unreviewed	ZBT14 protein	447	PF00651	25..128
	Gopherus agassizii	Chordata	Craniata		Testudines	38772	A0A452I7L1	5.3e-08	36.4	0.5	1.6e-07	34.8	0.5	1.8	1	IPR000210(26...132)	unreviewed	Uncharacterized protein	448	PF00651	26..129
	Gopherus evgoodei	Chordata	Craniata		Testudines	1825980	A0A8C4YLR1	5.3e-08	36.4	0.5	1.6e-07	34.8	0.5	1.8	1	IPR000210(26...132)	unreviewed	Zinc finger and BTB domain-containing protein 14	448	PF00651	26..129
	Gorilla gorilla	Chordata	Craniata	Mammalia	Primates	9595	G3RSG2	6.8e-08	36	0.5	1.6e-07	34.8	0.5	1.6	1	IPR000210(23...129)	unreviewed	Zinc finger and BTB domain containing 14	446	PF00651	23..126
	Gorilla gorilla	Chordata	Craniata	Mammalia	Primates	9595	G3RT13	6.8e-08	36	0.5	1.6e-07	34.8	0.5	1.6	1	IPR000210(26...132)	unreviewed	Zinc finger and BTB domain containing 14	449	PF00651	26..129
	Grallaria varia	Chordata	Craniata	Aves	Passeriformes	117165	A0A7K9A7I5	5.5e-08	36.3	0.5	1.6e-07	34.8	0.5	1.8	1	IPR000210(25...131)	unreviewed	ZBT14 protein	447	PF00651	25..128
	Grantiella picta	Chordata	Craniata	Aves	Passeriformes	266360	A0A7K6E1J1	5.2e-08	36.4	0.5	1.6e-07	34.8	0.5	1.9	1	IPR000210(25...131)	unreviewed	ZBT14 protein	447	PF00651	25..128
	Grus americana	Chordata	Craniata	Aves	Gruiformes	9117	A0A850TJF4	5.2e-08	36.4	0.5	1.6e-07	34.8	0.5	1.8	1	IPR000210(25...131)	unreviewed	ZBT14 protein	447	PF00651	25..128
	Gymnorhina tibicen	Chordata	Craniata	Aves	Passeriformes	9132	A0A7L1AR30	5.2e-08	36.4	0.5	1.6e-07	34.8	0.5	1.8	1	IPR000210(25...131)	unreviewed	ZBT14 protein	447	PF00651	25..128
	Halcyon senegalensis	Chordata	Craniata	Aves	Coraciiformes	342381	A0A851Z8R3	5.2e-08	36.4	0.5	1.6e-07	34.8	0.5	1.9	1	IPR000210(25...131)	unreviewed	ZBT14 protein	447	PF00651	25..128
	Haliaeetus albicilla	Chordata	Craniata	Aves	Accipitriformes	8969	A0A7K7NVY5	5.2e-08	36.4	0.5	1.6e-07	34.8	0.5	1.8	1	IPR000210(25...131)	unreviewed	ZBT14 protein	447	PF00651	25..128
	Heliornis fulica	Chordata	Craniata	Aves	Gruiformes	54369	A0A7L2AGV8	5.2e-08	36.4	0.5	1.6e-07	34.8	0.5	1.8	1	IPR000210(25...131)	unreviewed	ZBT14 protein	447	PF00651	25..128
	Hemiprocne comata	Chordata	Craniata	Aves	Apodiformes	243314	A0A7K9DPU4	5.2e-08	36.4	0.5	1.6e-07	34.8	0.5	1.8	1	IPR000210(25...131)	unreviewed	ZBT14 protein	447	PF00651	25..128
	Herpetotheres cachinnans	Chordata	Craniata	Aves	Falconiformes	56343	A0A7L0H0Z4	5.2e-08	36.4	0.5	1.6e-07	34.8	0.5	1.8	1	IPR000210(25...131)	unreviewed	ZBT14 protein	447	PF00651	25..128
	Himantopus himantopus	Chordata	Craniata	Aves	Charadriiformes	225398	A0A7L1L9S1	5.2e-08	36.4	0.5	1.6e-07	34.8	0.5	1.8	1	IPR000210(25...131)	unreviewed	ZBT14 protein	447	PF00651	25..128
	Hippolais icterina	Chordata	Craniata	Aves	Passeriformes	68497	A0A7L2LFK7	5.2e-08	36.4	0.5	1.6e-07	34.8	0.5	1.9	1	IPR000210(25...131)	unreviewed	ZBT14 protein	447	PF00651	25..128
	Hipposideros armiger	Chordata	Craniata	Mammalia	Chiroptera	186990	A0A8B7T895	6.9e-08	36	0.5	1.6e-07	34.8	0.5	1.6	1	IPR000210(26...132)	unreviewed	Zinc finger and BTB domain containing 14	449	PF00651	26..129
	Hirundo rustica	Chordata	Craniata	Aves	Passeriformes	333673	A0A3M0KQV9	5.1e-08	36.4	0.5	1.6e-07	34.9	0.5	1.9	1	IPR000210(20...126)	unreviewed	Zinc finger and BTB domain-containing protein 14	442	PF00651	20..123
	Hirundo rustica	Chordata	Craniata	Aves	Passeriformes	43150	A0A7L4DXJ5	5.2e-08	36.4	0.5	1.6e-07	34.8	0.5	1.9	1	IPR000210(25...131)	unreviewed	ZBT14 protein	447	PF00651	25..128
	Homo sapiens	Chordata	Craniata	Mammalia	Primates	9606	B2R850	6.8e-08	36	0.5	1.6e-07	34.8	0.5	1.6	1	IPR000210(26...132)	unreviewed	cDNA, FLJ93740, highly similar to Homo sapiens zinc finger protein 161 homolog (mouse) (ZFP161), mRNA	449	PF00651	26..129
	Homo sapiens	Chordata	Craniata	Mammalia	Primates	9606	O43829	6.8e-08	36	0.5	1.6e-07	34.8	0.5	1.6	1	IPR000210(26...132)	reviewed	Zinc finger and BTB domain-containing protein 14	449	PF00651	26..129
	Horornis vulcanius	Chordata	Craniata	Aves	Passeriformes	2585811	A0A7L3M6J6	5.2e-08	36.4	0.5	1.6e-07	34.8	0.5	1.9	1	IPR000210(25...131)	unreviewed	ZBT14 protein	447	PF00651	25..128
	Hylia prasina	Chordata	Craniata	Aves	Passeriformes	208073	A0A7K5W4Z9	5.2e-08	36.4	0.5	1.6e-07	34.8	0.5	1.9	1	IPR000210(25...131)	unreviewed	ZBT14 protein	447	PF00651	25..128
	Hymenochirus boettgeri	Chordata	Craniata	Amphibia	Anura	247094	A0A8T2JAC1	5.4e-08	36.3	0.5	1.6e-07	34.8	0.5	1.8	1	IPR000210(26...132)	unreviewed	Zinc finger and BTB domain-containing protein 14	453	PF00651	26..129
	Hypocryptadius cinnamomeus	Chordata	Craniata	Aves	Passeriformes	589841	A0A7L2PXF0	5.2e-08	36.4	0.5	1.6e-07	34.8	0.5	1.9	1	IPR000210(25...131)	unreviewed	ZBT14 protein	447	PF00651	25..128
	Ibidorhyncha struthersii	Chordata	Craniata	Aves	Charadriiformes	425643	A0A7K7U1M7	5.2e-08	36.4	0.5	1.6e-07	34.8	0.5	1.8	1	IPR000210(25...131)	unreviewed	ZBT14 protein	447	PF00651	25..128
	Ictidomys tridecemlineatus	Chordata	Craniata	Mammalia	Rodentia	43179	I3N111	6.9e-08	36	0.5	1.6e-07	34.8	0.5	1.6	1	IPR000210(26...132)	unreviewed	Zinc finger and BTB domain containing 14	448	PF00651	26..129
	Ifrita kowaldi	Chordata	Craniata	Aves	Passeriformes	461245	A0A7K6P6Z1	5.2e-08	36.4	0.5	1.6e-07	34.8	0.5	1.9	1	IPR000210(25...131)	unreviewed	ZBT14 protein	447	PF00651	25..128
	Illadopsis cleaveri	Chordata	Craniata	Aves	Passeriformes	201329	A0A7L1BHP2	5.2e-08	36.4	0.5	1.6e-07	34.8	0.5	1.9	1	IPR000210(25...131)	unreviewed	ZBT14 protein	447	PF00651	25..128
	Indicator maculatus	Chordata	Craniata	Aves	Piciformes	545262	A0A7L1GVU0	5.2e-08	36.4	0.5	1.6e-07	34.8	0.5	1.9	1	IPR000210(25...131)	unreviewed	ZBT14 protein	447	PF00651	25..128
	Irena cyanogastra	Chordata	Craniata	Aves	Passeriformes	175120	A0A7K9QWE0	5.2e-08	36.4	0.5	1.6e-07	34.8	0.5	1.9	1	IPR000210(25...131)	unreviewed	ZBT14 protein	447	PF00651	25..128
	Jacana jacana	Chordata	Craniata	Aves	Charadriiformes	54508	A0A7L2YUT7	5.3e-08	36.4	0.5	1.6e-07	34.8	0.5	1.8	1	IPR000210(25...131)	unreviewed	ZBT14 protein	447	PF00651	25..128
	Jaculus jaculus	Chordata	Craniata	Mammalia	Rodentia	51337	A0A8C5KRK3	6.7e-08	36	0.5	1.6e-07	34.8	0.5	1.6	1	IPR000210(26...131)	unreviewed	Zinc finger and BTB domain-containing protein 14	448	PF00651	26..128
	Junco hyemalis	Chordata	Craniata	Aves	Passeriformes	40217	A0A8C5IEL3	5.2e-08	36.4	0.5	1.6e-07	34.8	0.5	1.9	1	IPR000210(26...132)	unreviewed	ZBT14 protein	448	PF00651	26..129
	Lanius ludovicianus	Chordata	Craniata	Aves	Passeriformes	28713	A0A7K5RRZ3	5.2e-08	36.4	0.5	1.6e-07	34.8	0.5	1.9	1	IPR000210(25...131)	unreviewed	ZBT14 protein	447	PF00651	25..128
	Larus smithsonianus	Chordata	Craniata	Aves	Charadriiformes	243888	A0A852GHE7	5.2e-08	36.4	0.5	1.6e-07	34.8	0.5	1.8	1	IPR000210(25...131)	unreviewed	ZBT14 protein	447	PF00651	25..128
	Laticauda laticaudata	Chordata	Craniata	Lepidosauria	Squamata	8630	A0A8C5WV53	5.2e-08	36.4	0.5	1.6e-07	34.8	0.5	1.8	1	IPR000210(25...131)	unreviewed	ZBT14 protein	447	PF00651	25..128
	Latimeria chalumnae	Chordata	Craniata		Coelacanthiformes	7897	H3ASX2	7.2e-08	35.9	0.5	1.6e-07	34.8	0.5	1.6	1	IPR000210(28...134)	unreviewed	Zinc finger and BTB domain containing 14	453	PF00651	28..133
	Leiothrix lutea	Chordata	Craniata	Aves	Passeriformes	36275	A0A7L1ZLE2	5.2e-08	36.4	0.5	1.6e-07	34.8	0.5	1.9	1	IPR000210(25...131)	unreviewed	ZBT14 protein	447	PF00651	25..128
	Lepidothrix coronata	Chordata	Craniata	Aves	Passeriformes	321398	A0A6J0IQU5	5.3e-08	36.4	0.5	1.6e-07	34.8	0.5	1.8	1	IPR000210(26...132)	unreviewed	Zinc finger and BTB domain-containing protein 14	448	PF00651	26..129
	Leptobrachium leishanense	Chordata	Craniata	Amphibia	Anura	445787	A0A8C5MDZ5	7.1e-08	36	0.3	1.6e-07	34.8	0.3	1.6	1	IPR000210(44...151)	unreviewed	BTB domain-containing protein	586	PF00651	44..150
	Leptobrachium leishanense	Chordata	Craniata	Amphibia	Anura	445787	A0A8C5QHK1	3.5e-08	36.9	0.5	1.6e-07	34.8	0.5	2.2	1	IPR000210(26...132)	unreviewed	Zinc finger and BTB domain-containing protein 14	452	PF00651	26..128
	Leptocoma aspasia	Chordata	Craniata	Aves	Passeriformes	2585812	A0A7L0UXH2	5.2e-08	36.4	0.5	1.6e-07	34.8	0.5	1.9	1	IPR000210(25...131)	unreviewed	ZBT14 protein	447	PF00651	25..128
	Leptosomus discolor	Chordata	Craniata	Aves	Coraciiformes	188344	A0A091PGQ8	5.2e-08	36.4	0.5	1.6e-07	34.8	0.5	1.9	1	IPR000210(26...132)	unreviewed	Zinc finger and BTB domain-containing protein 14	448	PF00651	26..129
	Leucopsar rothschildi	Chordata	Craniata	Aves	Passeriformes	127929	A0A7K8EBN6	5.2e-08	36.4	0.5	1.6e-07	34.8	0.5	1.9	1	IPR000210(25...131)	unreviewed	ZBT14 protein	447	PF00651	25..128
	Limosa lapponica	Chordata	Craniata	Aves	Charadriiformes	1758121	A0A2I0ULM9	5.2e-08	36.4	0.5	1.6e-07	34.9	0.5	1.8	1	IPR000210(20...126)	unreviewed	Zinc finger and btb domain-containing protein 14	442	PF00651	20..123
	Lipotes vexillifer	Chordata	Craniata	Mammalia	Artiodactyla	118797	A0A340YD26	8e-08	35.8	0.2	1.6e-07	34.8	0.2	1.5	1	IPR000210(8...115)	unreviewed	BTB domain-containing protein	555	PF00651	8..114
	Locustella ochotensis	Chordata	Craniata	Aves	Passeriformes	187437	A0A7L1RN91	5.2e-08	36.4	0.5	1.6e-07	34.8	0.5	1.9	1	IPR000210(25...131)	unreviewed	ZBT14 protein	447	PF00651	25..128
	Lonchura striata	Chordata	Craniata	Aves	Passeriformes	299123	A0A218UTX5	5.2e-08	36.4	0.5	1.6e-07	34.8	0.5	1.9	1	IPR000210(26...132)	unreviewed	Zinc finger and BTB domain-containing protein 14	448	PF00651	26..129
	Lophotis ruficrista	Chordata	Craniata	Aves	Gruiformes	172689	A0A7K8JNP2	5.2e-08	36.4	0.5	1.6e-07	34.8	0.5	1.8	1	IPR000210(25...131)	unreviewed	ZBT14 protein	447	PF00651	25..128
	Loxia curvirostra	Chordata	Craniata	Aves	Passeriformes	64802	A0A7K7IVX7	5.2e-08	36.4	0.5	1.6e-07	34.8	0.5	1.9	1	IPR000210(25...131)	unreviewed	ZBT14 protein	447	PF00651	25..128
	Loxia leucoptera	Chordata	Craniata	Aves	Passeriformes	96539	A0A7K9GUT0	5.2e-08	36.4	0.5	1.6e-07	34.8	0.5	1.9	1	IPR000210(25...131)	unreviewed	ZBT14 protein	447	PF00651	25..128
	Lynx canadensis	Chordata	Craniata	Mammalia	Carnivora	61383	A0A667GY59	7e-08	36	0.5	1.6e-07	34.8	0.5	1.6	1	IPR000210(26...132)	unreviewed	Zinc finger and BTB domain containing 14	449	PF00651	26..129
	Lynx canadensis	Chordata	Craniata	Mammalia	Carnivora	61383	A0A667HF22	7.5e-08	35.9	0.2	1.6e-07	34.8	0.2	1.5	1	IPR000210(40...147)	unreviewed	BTB domain-containing protein	548	PF00651	40..146
	Lynx pardinus	Chordata	Craniata	Mammalia	Carnivora	191816	A0A485N9P9	7.7e-08	35.8	0.2	1.6e-07	34.8	0.2	1.5	1	IPR000210(53...160)	unreviewed	BTB domain-containing protein	561	PF00651	53..159
	Lynx pardinus	Chordata	Craniata	Mammalia	Carnivora	191816	A0A485NJZ3	7e-08	36	0.5	1.6e-07	34.8	0.5	1.6	1	IPR000210(26...132)	unreviewed	Zinc finger protein 161 homolog	449	PF00651	26..129
	Macaca fascicularis	Chordata	Craniata	Mammalia	Primates	9541	A0A2K5UZ41	6.8e-08	36	0.5	1.6e-07	34.8	0.5	1.6	1	IPR000210(26...132)	unreviewed	Zinc finger and BTB domain-containing protein 14	449	PF00651	26..129
	Macaca fascicularis	Chordata	Craniata	Mammalia	Primates	9541	G7PWF0	6.8e-08	36	0.5	1.6e-07	34.8	0.5	1.6	1	IPR000210(25...131)	unreviewed	Zinc finger protein 161-like protein	448	PF00651	25..128
	Macaca mulatta	Chordata	Craniata	Mammalia	Primates	9544	A0A1D5Q1Q9	7e-08	36	0.2	1.6e-07	34.8	0.2	1.6	1	IPR000210(46...153)	unreviewed	BTB domain-containing protein	549	PF00651	46..152
	Macaca mulatta	Chordata	Craniata	Mammalia	Primates	9544	F6RIC1	6.8e-08	36	0.5	1.6e-07	34.8	0.5	1.6	1	IPR000210(26...132)	unreviewed	Zinc finger and BTB domain containing 14	449	PF00651	26..129
	Macaca mulatta	Chordata	Craniata	Mammalia	Primates	9544	F7GX89	7.4e-08	35.9	0.2	1.6e-07	34.8	0.2	1.5	1	IPR000210(46...153)	unreviewed	BTB domain-containing protein	545	PF00651	46..152
	Macaca mulatta	Chordata	Craniata	Mammalia	Primates	9544	G7NKD8	6.8e-08	36	0.5	1.6e-07	34.8	0.5	1.6	1	IPR000210(25...131)	unreviewed	Zinc finger protein 161-like protein	448	PF00651	25..128
	Macaca nemestrina	Chordata	Craniata	Mammalia	Primates	9545	A0A2K6DH08	6.8e-08	36	0.5	1.6e-07	34.8	0.5	1.6	1	IPR000210(26...132)	unreviewed	Zinc finger and BTB domain containing 14	449	PF00651	26..129
	Machaerirhynchus nigripectus	Chordata	Craniata	Aves	Passeriformes	1160894	A0A7K6JBD4	5.2e-08	36.4	0.5	1.6e-07	34.8	0.5	1.9	1	IPR000210(25...131)	unreviewed	ZBT14 protein	447	PF00651	25..128
	Malurus cyaneus	Chordata	Craniata	Aves	Passeriformes	2593467	A0A8C5TL39	5.2e-08	36.4	0.5	1.6e-07	34.8	0.5	1.9	1	IPR000210(25...131)	unreviewed	ZBT14 protein	447	PF00651	25..128
	Malurus elegans	Chordata	Craniata	Aves	Passeriformes	720584	A0A7K6GIB5	5.2e-08	36.4	0.5	1.6e-07	34.8	0.5	1.9	1	IPR000210(25...131)	unreviewed	ZBT14 protein	447	PF00651	25..128
	Manacus vitellinus	Chordata	Craniata	Aves	Passeriformes	328815	A0A093Q0Y5	5.2e-08	36.4	0.5	1.6e-07	34.8	0.5	1.8	1	IPR000210(26...132)	unreviewed	Zinc finger and BTB domain-containing protein 14	448	PF00651	26..129
	Mandrillus leucophaeus	Chordata	Craniata	Mammalia	Primates	9568	A0A2K5YRV4	6.8e-08	36	0.5	1.6e-07	34.8	0.5	1.6	1	IPR000210(26...132)	unreviewed	Zinc finger and BTB domain containing 14	449	PF00651	26..129
	Mandrillus leucophaeus	Chordata	Craniata	Mammalia	Primates	9568	A0A2K5YRV8	6.8e-08	36	0.5	1.6e-07	34.8	0.5	1.6	1	IPR000210(23...129)	unreviewed	Zinc finger and BTB domain containing 14	446	PF00651	23..126
	Marmota marmota	Chordata	Craniata	Mammalia	Rodentia	9994	A0A8C5ZIW5	6.9e-08	36	0.5	1.6e-07	34.8	0.5	1.6	1	IPR000210(26...132)	unreviewed	Zinc finger and BTB domain-containing protein 14	448	PF00651	26..129
	Marmota monax	Chordata	Craniata	Mammalia	Rodentia	9995	A0A5E4BI89	6.9e-08	36	0.5	1.6e-07	34.8	0.5	1.6	1	IPR000210(26...132)	unreviewed	Zinc finger and BTB domain-containing protein 14	448	PF00651	26..129
	Marmota monax	Chordata	Craniata	Mammalia	Rodentia	9995	A0A5E4CH62	7.3e-08	35.9	0.2	1.6e-07	34.8	0.2	1.5	1	IPR000210(46...153)	unreviewed	BTB domain-containing protein	546	PF00651	46..152
	Marmota monax	Chordata	Craniata	Mammalia	Rodentia	9995	A0A834QCB6	6.9e-08	36	0.5	1.6e-07	34.8	0.5	1.6	1	IPR000210(26...132)	unreviewed	Zinc finger and BTB domain-containing protein 14	448	PF00651	26..129
	Mauremys mutica	Chordata	Craniata		Testudines	74926	A0A9D4AZZ8	5.3e-08	36.4	0.5	1.6e-07	34.8	0.5	1.8	1	IPR000210(26...132)	unreviewed	Zinc finger and BTB domain-containing protein 14	448	PF00651	26..129
	Melanocharis versteri	Chordata	Craniata	Aves	Passeriformes	254552	A0A7K7ZLE5	5.1e-08	36.4	0.5	1.6e-07	34.8	0.5	1.9	1	IPR000210(25...131)	unreviewed	ZBT14 protein	447	PF00651	25..128
	Meleagris gallopavo	Chordata	Craniata	Aves	Galliformes	9103	G1NRQ7	5.2e-08	36.4	0.5	1.6e-07	34.8	0.5	1.8	1	IPR000210(26...132)	unreviewed	Uncharacterized protein	448	PF00651	26..129
	Melopsittacus undulatus	Chordata	Craniata	Aves	Psittaciformes	13146	A0A8C6J074	5.3e-08	36.4	0.5	1.6e-07	34.8	0.5	1.8	1	IPR000210(26...132)	unreviewed	Uncharacterized protein	448	PF00651	26..129
	Melospiza melodia	Chordata	Craniata	Aves	Passeriformes	44397	A0A7K4PQF2	5.2e-08	36.4	0.5	1.6e-07	34.8	0.5	1.9	1	IPR000210(25...131)	unreviewed	ZBT14 protein	447	PF00651	25..128
	Menura novaehollandiae	Chordata	Craniata	Aves	Passeriformes	47692	A0AA97N7B7	5.2e-08	36.4	0.5	1.6e-07	34.8	0.5	1.8	1	IPR000210(25...131)	unreviewed	ZBT14 protein	447	PF00651	25..128
	Mesembrinibis cayennensis	Chordata	Craniata	Aves	Pelecaniformes	1118748	A0A7L0PXR5	5.2e-08	36.4	0.5	1.6e-07	34.8	0.5	1.9	1	IPR000210(25...131)	unreviewed	ZBT14 protein	447	PF00651	25..128
	Mesitornis unicolor	Chordata	Craniata	Aves	Gruiformes	54374	A0A091RGN2	5.1e-08	36.4	0.5	1.6e-07	34.8	0.5	1.9	1	IPR000210(26...132)	unreviewed	Zinc finger and BTB domain-containing protein 14	448	PF00651	26..129
	Mesocricetus auratus	Chordata	Craniata	Mammalia	Rodentia	10036	A0A1U7QWP2	6.9e-08	36	0.5	1.6e-07	34.8	0.5	1.6	1	IPR000210(26...132)	unreviewed	Zinc finger and BTB domain-containing protein 14	449	PF00651	26..129
	Microcaecilia unicolor	Chordata	Craniata	Amphibia	Gymnophiona	1415580	A0A6P7X5Y9	5.6e-08	36.3	0.5	1.6e-07	34.8	0.5	1.8	1	IPR000210(20...126)	unreviewed	Zinc finger and BTB domain-containing protein 14 isoform X2	447	PF00651	20..123
	Microcaecilia unicolor	Chordata	Craniata	Amphibia	Gymnophiona	1415580	A0A6P7X721	5.6e-08	36.3	0.5	1.6e-07	34.8	0.5	1.8	1	IPR000210(26...132)	unreviewed	Zinc finger and BTB domain-containing protein 14 isoform X1	453	PF00651	26..129
	Microcebus murinus	Chordata	Craniata	Mammalia	Primates	30608	A0A8B7GRZ0	8e-08	35.8	0.2	1.6e-07	34.8	0.2	1.5	1	IPR000210(8...115)	unreviewed	BTB domain-containing protein	555	PF00651	8..114
	Microcebus murinus	Chordata	Craniata	Mammalia	Primates	30608	A0A8C5VVW9	6.9e-08	36	0.5	1.6e-07	34.8	0.5	1.6	1	IPR000210(26...132)	unreviewed	Zinc finger and BTB domain-containing protein 14	449	PF00651	26..129
	Mionectes macconnelli	Chordata	Craniata	Aves	Passeriformes	254557	A0A7K5JPI6	5.3e-08	36.4	0.5	1.6e-07	34.8	0.5	1.8	1	IPR000210(25...131)	unreviewed	ZBT14 protein	447	PF00651	25..128
	Mohoua ochrocephala	Chordata	Craniata	Aves	Passeriformes	874463	A0A7K7XVB0	5.2e-08	36.4	0.5	1.6e-07	34.8	0.5	1.9	1	IPR000210(25...131)	unreviewed	ZBT14 protein	447	PF00651	25..128
	Molossus molossus	Chordata	Craniata	Mammalia	Chiroptera	27622	A0A7J8HKT1	6.9e-08	36	0.5	1.6e-07	34.8	0.5	1.6	1	IPR000210(26...132)	unreviewed	Zinc finger and BTB domain containing 14	449	PF00651	26..129
	Molothrus ater	Chordata	Craniata	Aves	Passeriformes	84834	A0A7L3V5L7	5.2e-08	36.4	0.5	1.6e-07	34.8	0.5	1.9	1	IPR000210(25...131)	unreviewed	ZBT14 protein	447	PF00651	25..128
	Monodelphis domestica	Chordata	Craniata	Mammalia	Didelphimorphia	13616	F7GDU6	6.6e-08	36.1	0.5	1.6e-07	34.8	0.5	1.7	1	IPR000210(26...132)	unreviewed	Zinc finger and BTB domain containing 14	448	PF00651	26..129
	Monodon monoceros	Chordata	Craniata	Mammalia	Artiodactyla	40151	A0A4U1EYU4	6.7e-08	36	0.5	1.6e-07	34.9	0.5	1.6	1	IPR000210(20...126)	unreviewed	Zinc finger and BTB domain-containing protein 14	443	PF00651	20..123
	Monodon monoceros	Chordata	Craniata	Mammalia	Artiodactyla	40151	A0A8C6AUJ9	6.8e-08	36	0.5	1.6e-07	34.8	0.5	1.6	1	IPR000210(26...132)	unreviewed	Zinc finger and BTB domain-containing protein 14	449	PF00651	26..129
	Moschus moschiferus	Chordata	Craniata	Mammalia	Artiodactyla	68415	A0A8C6DU10	6.8e-08	36	0.5	1.6e-07	34.8	0.5	1.6	1	IPR000210(26...132)	unreviewed	Zinc finger and BTB domain-containing protein 14	449	PF00651	26..129
	Moschus moschiferus	Chordata	Craniata	Mammalia	Artiodactyla	68415	A0A8C6G2F1	7.9e-08	35.8	0.2	1.6e-07	34.8	0.2	1.5	1	IPR000210(10...111)	unreviewed	BTB domain-containing protein	551	PF00651	10..110
	Motacilla alba	Chordata	Craniata	Aves	Passeriformes	45807	A0A7K5BN51	5.2e-08	36.4	0.5	1.6e-07	34.8	0.5	1.9	1	IPR000210(25...131)	unreviewed	ZBT14 protein	447	PF00651	25..128
	Muntiacus muntjak	Chordata	Craniata	Mammalia	Artiodactyla	9888	A0A5N3W6H8	7.4e-08	35.9	1.5	1.6e-07	34.8	1.5	1.6	1	IPR000210(29...209)	unreviewed	Zinc finger and BTB domain-containing protein 14	408	PF00651	29..76
	Muntiacus muntjak	Chordata	Craniata	Mammalia	Artiodactyla	9888	A0A5N3WJN8	6.8e-08	36	0.5	1.6e-07	34.8	0.5	1.6	1	IPR000210(26...132)	unreviewed	Zinc finger and BTB domain-containing protein 14	449	PF00651	26..129
	Muntiacus reevesi	Chordata	Craniata	Mammalia	Artiodactyla	9886	A0A5N3XY88	6.8e-08	36	0.5	1.6e-07	34.8	0.5	1.6	1	IPR000210(26...132)	unreviewed	Zinc finger and BTB domain-containing protein 14	449	PF00651	26..129
	Mus caroli	Chordata	Craniata	Mammalia	Rodentia	10089	A0A6P5NQB4	6.9e-08	36	0.5	1.6e-07	34.8	0.5	1.6	1	IPR000210(26...132)	unreviewed	Zinc finger and BTB domain-containing protein 14	449	PF00651	26..129
	Mus musculus	Chordata	Craniata	Mammalia	Rodentia	10090	Q08376	6.9e-08	36	0.5	1.6e-07	34.8	0.5	1.6	1	IPR000210(26...132)	reviewed	Zinc finger and BTB domain-containing protein 14	449	PF00651	26..129
	Mus musculus	Chordata	Craniata	Mammalia	Rodentia	10090	Q544H8	6.9e-08	36	0.5	1.6e-07	34.8	0.5	1.6	1	IPR000210(26...132)	unreviewed	Zinc finger and BTB domain-containing protein 14	449	PF00651	26..129
	Mus spicilegus	Chordata	Craniata	Mammalia	Rodentia	10103	A0A8C6GB14	6.9e-08	36	0.5	1.6e-07	34.8	0.5	1.6	1	IPR000210(26...132)	unreviewed	Zinc finger and BTB domain-containing protein 14	449	PF00651	26..129
	Mustela putorius	Chordata	Craniata	Mammalia	Carnivora	9669	M3Y0U9	6.8e-08	36	0.5	1.6e-07	34.8	0.5	1.6	1	IPR000210(26...132)	unreviewed	Zinc finger and BTB domain containing 14	449	PF00651	26..129
	Myiagra hebetior	Chordata	Craniata	Aves	Passeriformes	381031	A0A7K9IRJ2	5.2e-08	36.4	0.5	1.6e-07	34.8	0.5	1.9	1	IPR000210(25...131)	unreviewed	ZBT14 protein	447	PF00651	25..128
	Myotis brandtii	Chordata	Craniata	Mammalia	Chiroptera	109478	S7MIB3	7.8e-08	35.8	0.2	1.6e-07	34.8	0.2	1.5	1	IPR000210(1...108)	unreviewed	BTB domain-containing protein	556	PF00651	1..107
	Myotis myotis	Chordata	Craniata	Mammalia	Chiroptera	51298	A0A7J7W1T8	6.9e-08	36	0.5	1.6e-07	34.8	0.5	1.6	1	IPR000210(26...132)	unreviewed	Zinc finger and BTB domain containing 14	449	PF00651	26..129
	Mystacornis crossleyi	Chordata	Craniata	Aves	Passeriformes	98133	A0A7L2S9A4	5.2e-08	36.4	0.5	1.6e-07	34.8	0.5	1.9	1	IPR000210(25...131)	unreviewed	ZBT14 protein	447	PF00651	25..128
	Nannospalax galili	Chordata	Craniata	Mammalia	Rodentia	1026970	A0A8C6W9E0	6.8e-08	36	0.5	1.6e-07	34.8	0.5	1.6	1	IPR000210(26...132)	unreviewed	Zinc finger and BTB domain-containing protein 14	449	PF00651	26..129
	Neodrepanis coruscans	Chordata	Craniata	Aves	Passeriformes	254563	A0A7L2RDW1	5.2e-08	36.4	0.5	1.6e-07	34.8	0.5	1.8	1	IPR000210(25...131)	unreviewed	ZBT14 protein	447	PF00651	25..128
	Neomonachus schauinslandi	Chordata	Craniata	Mammalia	Carnivora	29088	A0A2Y9GRG3	6.8e-08	36	0.5	1.6e-07	34.8	0.5	1.6	1	IPR000210(26...132)	unreviewed	Zinc finger and BTB domain-containing protein 14	449	PF00651	26..129
	Neomonachus schauinslandi	Chordata	Craniata	Mammalia	Carnivora	29088	A0A8M1M1Y7	7.3e-08	35.9	0.5	1.6e-07	34.8	0.5	1.6	1	IPR000210(26...132)	unreviewed	Zinc finger and BTB domain-containing protein 14	452	PF00651	26..129
	Neophocaena asiaeorientalis	Chordata	Craniata	Mammalia	Artiodactyla	1706337	A0A341CYI5	6.8e-08	36	0.5	1.6e-07	34.8	0.5	1.6	1	IPR000210(26...132)	unreviewed	Zinc finger and BTB domain-containing protein 14	449	PF00651	26..129
	Neophocaena asiaeorientalis	Chordata	Craniata	Mammalia	Artiodactyla	1706337	A0A341CYU7	8e-08	35.8	0.2	1.6e-07	34.8	0.2	1.5	1	IPR000210(8...115)	unreviewed	BTB domain-containing protein	555	PF00651	8..114
	Neopipo cinnamomea	Chordata	Craniata	Aves	Passeriformes	456388	A0A7K4R3J8	5.2e-08	36.4	0.5	1.6e-07	34.8	0.5	1.8	1	IPR000210(25...131)	unreviewed	ZBT14 protein	447	PF00651	25..128
	Nesospiza acunhae	Chordata	Craniata	Aves	Passeriformes	381881	A0A7K7SD66	5.2e-08	36.4	0.5	1.6e-07	34.8	0.5	1.9	1	IPR000210(25...131)	unreviewed	ZBT14 protein	447	PF00651	25..128
	Nicator chloris	Chordata	Craniata	Aves	Passeriformes	237433	A0A852HHS8	5.2e-08	36.4	0.5	1.6e-07	34.8	0.5	1.9	1	IPR000210(25...131)	unreviewed	ZBT14 protein	447	PF00651	25..128
	Nipponia nippon	Chordata	Craniata	Aves	Pelecaniformes	128390	A0A091VJP7	5.2e-08	36.4	0.5	1.6e-07	34.8	0.5	1.8	1	IPR000210(26...132)	unreviewed	Zinc finger and BTB domain-containing protein 14	448	PF00651	26..129
	Nomascus leucogenys	Chordata	Craniata	Mammalia	Primates	61853	G1R5F3	6.9e-08	36	0.5	1.6e-07	34.8	0.5	1.6	1	IPR000210(26...132)	unreviewed	Zinc finger and BTB domain containing 14	449	PF00651	26..129
	Notechis scutatus	Chordata	Craniata	Lepidosauria	Squamata	8663	A0A6J1U9P7	5.3e-08	36.4	0.5	1.6e-07	34.8	0.5	1.8	1	IPR000210(26...132)	unreviewed	Zinc finger and BTB domain-containing protein 14	448	PF00651	26..129
	Nothocercus julius	Chordata	Craniata	Aves	Tinamiformes	2585813	A0A7K7W2B2	5.5e-08	36.3	0.5	1.6e-07	34.8	0.5	1.8	1	IPR000210(25...131)	unreviewed	ZBT14 protein	447	PF00651	25..128
	Nothocercus nigrocapillus	Chordata	Craniata	Aves	Tinamiformes	1977171	A0A851STI4	5.5e-08	36.3	0.5	1.6e-07	34.8	0.5	1.8	1	IPR000210(25...131)	unreviewed	ZBT14 protein	447	PF00651	25..128
	Nothoprocta ornata	Chordata	Craniata	Aves	Tinamiformes	83376	A0A7K7BAE2	5.5e-08	36.3	0.5	1.6e-07	34.8	0.5	1.8	1	IPR000210(25...131)	unreviewed	ZBT14 protein	447	PF00651	25..128
	Nothoprocta pentlandii	Chordata	Craniata	Aves	Tinamiformes	2585814	A0A7K6ZHP4	5.5e-08	36.3	0.5	1.6e-07	34.8	0.5	1.8	1	IPR000210(25...131)	unreviewed	ZBT14 protein	447	PF00651	25..128
	Notiomystis cincta	Chordata	Craniata	Aves	Passeriformes	366454	A0A7K6VGI2	5.2e-08	36.4	0.5	1.6e-07	34.8	0.5	1.9	1	IPR000210(25...131)	unreviewed	ZBT14 protein	447	PF00651	25..128
	Nyctereutes procyonoides	Chordata	Craniata	Mammalia	Carnivora	34880	A0A811YGI6	6.8e-08	36	0.5	1.6e-07	34.8	0.5	1.6	1	IPR000210(26...132)	unreviewed	Zinc finger and BTB domain containing 14	449	PF00651	26..129
	Nyctibius bracteatus	Chordata	Craniata	Aves	Caprimulgiformes	48426	A0A7K8T9E9	5.2e-08	36.4	0.5	1.6e-07	34.8	0.5	1.8	1	IPR000210(25...131)	unreviewed	ZBT14 protein	447	PF00651	25..128
	Nyctibius grandis	Chordata	Craniata	Aves	Caprimulgiformes	48427	A0A7L2GDP1	5.2e-08	36.4	0.5	1.6e-07	34.8	0.5	1.8	1	IPR000210(25...131)	unreviewed	ZBT14 protein	447	PF00651	25..128
	Nycticryphes semicollaris	Chordata	Craniata	Aves	Charadriiformes	227226	A0A7L1HEF7	5.3e-08	36.4	0.5	1.6e-07	34.8	0.5	1.8	1	IPR000210(25...131)	unreviewed	ZBT14 protein	447	PF00651	25..128
	Nyctiprogne leucopyga	Chordata	Craniata	Aves	Caprimulgiformes	382315	A0A7L4C8D7	5.2e-08	36.4	0.5	1.6e-07	34.8	0.5	1.8	1	IPR000210(25...131)	unreviewed	ZBT14 protein	447	PF00651	25..128
	Oceanites oceanicus	Chordata	Craniata	Aves	Procellariiformes	79653	A0A7K8UBC7	5.2e-08	36.4	0.5	1.6e-07	34.8	0.5	1.8	1	IPR000210(25...131)	unreviewed	ZBT14 protein	447	PF00651	25..128
	Oceanodroma tethys	Chordata	Craniata	Aves	Procellariiformes	79633	A0A7K9LSZ3	5.2e-08	36.4	0.5	1.6e-07	34.8	0.5	1.8	1	IPR000210(25...131)	unreviewed	ZBT14 protein	447	PF00651	25..128
	Octodon degus	Chordata	Craniata	Mammalia	Rodentia	10160	A0A6P3ERW0	8e-08	35.8	0.2	1.6e-07	34.8	0.2	1.5	1	IPR000210(8...115)	unreviewed	BTB domain-containing protein	555	PF00651	8..114
	Odobenus rosmarus	Chordata	Craniata	Mammalia	Carnivora	9708	A0A2U3WQC7	8e-08	35.8	0.2	1.6e-07	34.8	0.2	1.5	1	IPR000210(8...115)	unreviewed	BTB domain-containing protein	555	PF00651	8..114
	Odobenus rosmarus	Chordata	Craniata	Mammalia	Carnivora	9708	A0A2U3WRL4	6.8e-08	36	0.5	1.6e-07	34.8	0.5	1.6	1	IPR000210(26...132)	unreviewed	Zinc finger and BTB domain-containing protein 14	449	PF00651	26..129
	Odocoileus virginianus	Chordata	Craniata	Mammalia	Artiodactyla	9880	A0A6J0YW76	6.8e-08	36	0.5	1.6e-07	34.8	0.5	1.6	1	IPR000210(26...132)	unreviewed	Zinc finger and BTB domain-containing protein 14	449	PF00651	26..129
	Odontophorus gujanensis	Chordata	Craniata	Aves	Galliformes	886794	A0A7K9YT59	5.2e-08	36.4	0.5	1.6e-07	34.8	0.5	1.8	1	IPR000210(25...131)	unreviewed	ZBT14 protein	447	PF00651	25..128
	Oenanthe oenanthe	Chordata	Craniata	Aves	Passeriformes	279966	A0A7L1E3G8	5.2e-08	36.4	0.5	1.6e-07	34.8	0.5	1.9	1	IPR000210(25...131)	unreviewed	ZBT14 protein	447	PF00651	25..128
	Onychorhynchus coronatus	Chordata	Craniata	Aves	Passeriformes	360224	A0A7K5ZM64	5.2e-08	36.4	0.5	1.6e-07	34.8	0.5	1.8	1	IPR000210(25...131)	unreviewed	ZBT14 protein	447	PF00651	25..128
	Opisthocomus hoazin	Chordata	Craniata	Aves	Opisthocomiformes	30419	A0A091VUK0	5.2e-08	36.4	0.5	1.6e-07	34.8	0.5	1.9	1	IPR000210(26...132)	unreviewed	Zinc finger and BTB domain-containing protein 14	448	PF00651	26..129
	Oreocharis arfaki	Chordata	Craniata	Aves	Passeriformes	979223	A0A7K6JQU7	5.2e-08	36.4	0.5	1.6e-07	34.8	0.5	1.9	1	IPR000210(25...131)	unreviewed	ZBT14 protein	447	PF00651	25..128
	Oreochromis niloticus	Chordata	Craniata	Actinopteri	Cichliformes	8128	A0A669E7T1	6.3e-08	36.1	0.6	1.6e-07	34.8	0.6	1.7	1	IPR000210(63...169)	unreviewed	Zinc finger and BTB domain containing 14	478	PF00651	63..166
	Oreotrochilus melanogaster	Chordata	Craniata	Aves	Apodiformes	689266	A0A7L3N1H8	5.2e-08	36.4	0.5	1.6e-07	34.8	0.5	1.8	1	IPR000210(25...131)	unreviewed	ZBT14 protein	447	PF00651	25..128
[truncated: 36,114 more rows]
